# Supplementary material for: Systematic Analysis of AU-Rich Element Expression in Cancer Reveals Common Functional Clusters Regulated by Key RNA-Binding Proteins
Source: Oxford University Press journal article supplement (doi:10.1158/0008-5472.can-15-3110), 2016-05-17
Supplement: 00085472can153110-sup-158192_1_supp_3393887_43qhlm.xlsx [file 00085472can153110-sup-158192_1_supp_3393887_43qhlm.xlsx]

## Sheet: 414 overexpressed ARE-genes
genesymbol	TTP	HUR	TTP/HUR	NEK2	NUF2	TOP2A	CENPA	NCAPG	PRC1	CDC6	CENPE	KIF11	KIF18A	PBK	RRM2	CCNE2	ESCO2	LCORL	CKAP2L	E2F7	DEPDC1	KIF20A	ARHGAP11A	MCM10	SHCBP1	MLF1IP			MMP13	COL10A1	COL11A1	FN1		DSCR6	ESM1	KIAA1199	CNTNAP2	WISP1	FAM72A	FAM72B			MLF1IP		EZR	CEACAM7	EDN2	RTKN2	MARVELD2
ARED & RBP	1			3	1	1	1	2	1	1	2	1	1	1	1	1	2	1	1	2	1	1	1	1	1	1			1	2	1	1		1	1	2	1	1	3	3			1		1	2	2	1	1
Q-value	2.94e-13	7.1e-19		9.833e-39	3.6156e-41	7.39365e-41	6.48336e-39	3.2524e-41	3.36568e-52	3.23228e-41	2.83953e-44	1.64771e-57	6.79159e-32	5.1818e-32	6.12849e-36	1.07748e-50	8.76988e-29	3.2524e-41	1.06138e-31	2.10438e-37	1.95613e-33	1.83471e-39	3.23494e-32	1.15305e-42	1.07177e-28	5.70521e-30			4.57987e-53	2.69133e-49	1.23499e-68	3.25901e-48		4.82933e-34	4.6131e-25	3.41472e-34	2.05693e-25	2.90488e-44	5.72957e-39	5.72957e-39			5.70521e-30		7.3518e-22	2.83435e-28	2.8935e-17	1.18631e-22	3.16503e-13
Fold Change	-6.28	1.497	-7.777	13.7287	9.65197	8.76807	8.1289	5.89642	5.15621	4.61216	4.24731	4.23912	4.19804	5.77432	5.2992	8.6469	6.73825	5.89642	7.27839	7.4607	6.99642	5.26906	3.75921	4.77422	4.01501	3.78809			14.1709	43.718	40.9063	5.8008		5.46294	5.39116	8.23289	8.14068	7.11303	5.10844	5.10844			3.78809		3.6788	3.63008	3.6066	3.58017	3.5683
TCGA-A7-A13E-11	3.2035	-0.269	3.4725	-4.3235	-5.7765	-5.09	-4.95133	-4.9205	-4.4615	-4.353	-4.0845	-4.1595	-4.475	-5.5555	-4.8565	-3.96467	-5.1345	-4.9205	-5.5805	-6.0335	-5.496	-4.2475	-3.9245	-3.904	-4.293	-3.5425			-1.253	1.761	0.991	-1.9975		-1.984	-4.2595	-2.1065	-1.1285	0.52133	-4.925	-4.925			-3.5425		-2.2675	-0.008	-0.345	-3.635	-0.203
TCGA-A7-A13F-11	3.9695	-0.5725	4.542	-5.26	-6.253	-5.267	-5.1205	-4.931	-4.2555	-4.679	-3.883	-4.153	-4.8355	-5.5235	-4.753	-3.7165	-5.506	-4.931	-5.134	-6.0655	-5.382	-4.2935	-4.6235	-4.6025	-4.219	-3.3135			-0.0515	0.913	-0.578	-2.555		-2.064	-2.5415	-4.3645	-4.2125	-0.70717	-4.7455	-4.7455			-3.3135		-1.404	-0.508	-0.8105	-3.5375	-0.1375
TCGA-E2-A1BC-11	3.7645	-0.427	4.1915	-5.356	-6.771	-5.54	-6.02333	-5.046	-4.463	-4.961	-3.842	-4.069	-5.5365	-5.5385	-5.645	-4.78	-6.4865	-5.046	-5.6185	-8.164	-5.421	-4.0045	-4.7685	-4.2705	-4.9715	-3.568			0.119	0.9555	-1.0245	-2.041		-3.3215	-5.569	-6.7145	-4.0695	-1.359	-5.4705	-5.4705			-3.568		-3.842	-1.019	-2.597	-4.986	-2.6505
TCGA-BH-A0AY-11	3.137	-0.399	3.536	-4.8725	-5.592	-5.2935	-4.09267	-5.368	-3.83	-3.848	-4.1295	-4.004	-3.8885	-5.177	-4.4625	-3.91833	-4.737	-5.368	-4.4085	-6.2715	-4.6975	-4.017	-4.477	-4.544	-4.133	-3.868			-0.466	0.8105	0.8385	-2.8505		-1.264	-2.5815	-5.4395	-3.927	0.08867	-5.453	-5.453			-3.868		-0.8605	-0.2175	0.281	-3.108	0.7515
TCGA-BH-A0B3-11	2.3515	-0.379	2.7305	-5.196	-5.403	-5.074	-5.11683	-5.113	-3.701	-4.436	-4.018	-3.94	-3.816	-5.271	-4.7085	-3.6305	-4.537	-5.113	-4.6055	-5.7375	-4.392	-4.0945	-4.3575	-4.976	-4.411	-3.0995			-1.053	1.2075	0.162	-3.418		-1.768	-2.8845	-4.794	-3.8035	-0.36817	-5.546	-5.546			-3.0995		-1.036	-0.5195	1.127	-2.7595	0.805
TCGA-BH-A0B8-11	3.566	-0.5145	4.0805	-5.295	-6.568	-5.9305	-6.59917	-5.881	-4.6915	-4.342	-4.4	-4.1525	-5.118	-5.807	-5.377	-4.8725	-6.401	-5.881	-5.3445	-7.1615	-5.9565	-4.246	-4.299	-4.681	-4.812	-4.0285			-0.631	0.2635	-0.0085	-2.189		-3.1045	-6.549	-4.0955	-2.3505	0.0245	-5.4395	-5.4395			-4.0285		-3.0005	-1.0005	-1.7605	-4.557	-1.9355
TCGA-BH-A0BC-11	3.604	-1.827	5.431	-4.183	-3.9345	-4.689	-3.975	-3.774	-3.92	-4.5265	-2.934	-3.2335	-3.038	-3.388	-5.094	-3.463	-2.32	-3.774	-3.154	-3.789	-3.514	-3.937	-4.451	-4.0035	-3.455	-0.9255			-0.402	1.3575	1.2475	-2.107		-3.773	-4.1895	-4.861	-1.3815	-1.276	-4.4205	-4.4205			-0.9255		-1.1665	-0.1375	-1.088	-0.9455	-0.689
TCGA-BH-A0BM-11	2.766	-0.323	3.089	-3.7965	-4.767	-4.42	-4.814	-4.2065	-3.5505	-3.437	-3.676	-3.202	-3.011	-4.5465	-3.666	-3.235	-3.614	-4.2065	-3.549	-4.604	-3.273	-3.515	-4.139	-3.788	-3.412	-2.9515			-1.82	-0.2245	0.746	-3.438		-1.2285	-3.701	-4.9475	-3.334	-0.70367	-5.0025	-5.0025			-2.9515		-1.155	-0.058	0.67	-2.77	1.618
TCGA-BH-A0DZ-11	2.0225	-0.0455	2.068	-3.335	-4.1965	-4.047	-3.94067	-3.718	-3.035	-2.619	-3.26	-2.8565	-2.931	-3.412	-2.453	-2.12567	-2.4965	-3.718	-2.653	-4.299	-3.5965	-3.101	-3.66	-3.397	-2.9135	-2.0885			1.054	0.4085	1.216	-3.041		-0.9665	-1.128	-5.656	-1.7655	0.25667	-4.921	-4.921			-2.0885		-0.9485	2.737	1.684	-1.282	1.6005
TCGA-E2-A153-11	0.158	-1.773	1.931	-1.611	-2.6315	-4.7745	-3.7695	-2.9045	-2.7905	``	-1.765	-4.4235	-2.21	-3.6815	-1.793	-3.612	-3.569	-2.9045	-1.6575	-5.044	-1.0445	-1.5125	-1.15	-1.201	-0.816	-3.628			1.5565	1.611	1.1345	-0.477		-0.9845	-3.72	-1.61	1.0295	-0.79783	-2.234	-2.234			-3.628		-2.156	1.676	-0.3335	-2.2285	-4.406
TCGA-E2-A158-11	3.8715	-0.6405	4.512	-4.233	-4.408	-5.285	-3.82633	-4.979	-3.457	-4.4755	-3.205	-3.3195	-3.887	-5.802	-4.6935	-4.1	-5.3135	-4.979	-4.1265	-5.16	-3.806	-4.5295	-3.9975	-4.21	-4.316	-2.8145			-0.638	1.0015	-0.9365	-1.05		-2.704	-3.124	-3.9465	-3.57	1.12067	-3.887	-3.887			-2.8145		-1.978	-1.143	-1.705	-3.817	-1.423
TCGA-E2-A15I-11	4.2405	-0.878	5.1185	-6.131	-6.3205	-5.6445	-5.83117	-4.5825	-4.3725	-4.406	-3.6025	-3.5905	-5.2045	-5.636	-4.789	-3.37383	-5.515	-4.5825	-5.3985	-6.391	-5.7275	-4.1095	-4.8555	-4.118	-3.7965	-3.752			-0.4325	1.2155	-0.394	-2.015		-2.7215	-4.642	-5.565	-3.884	-1.1865	-5.3015	-5.3015			-3.752		-2.85	-0.2135	-2.4235	-3.694	-1.385
TCGA-A7-A0CE-11	2.889	-0.5825	3.4715	-3.512	-3.937	-4.003	-4.319	-4.2675	-2.9755	-3.112	-3.301	-3.653	-3.1115	-3.936	-3.666	-2.65167	-3.4675	-4.2675	-4.3685	-5.303	-3.5115	-3.5985	-3.872	-3.9555	-3.682	-1.9205			-0.5515	0.622	0.729	-3.1085		-0.7205	-2.447	-3.772	-4.1255	0.38667	-4.3445	-4.3445			-1.9205		-0.6475	1.312	-0.331	-2.6815	0.871
TCGA-A7-A0CH-11	3.157	-0.607	3.764	-3.616	-4.783	-4.394	-4.76683	-4.6465	-3.9365	-4.12	-3.526	-3.438	-4.574	-4.8655	-4.508	-3.5115	-3.8315	-4.6465	-3.5825	-5.1	-4.2565	-3.779	-4.5265	-3.863	-3.851	-3.237			-0.5605	2.362	0.093	-2.185		-1.1505	-4.7365	-4.643	0.6375	-1.39217	-4.62	-4.62			-3.237		-1.4505	-0.1255	0.969	-3.0525	1.306
TCGA-A7-A0D9-11	3.95575	-0.72175	4.6775	-4.45975	-5.78225	-5.44275	-5.25358	-5.50575	-4.23925	-4.79475	-3.62275	-3.92025	-5.30375	-5.62375	-5.39675	-3.86792	-5.14125	-5.50575	-4.39725	-6.62525	-4.63775	-4.20625	-4.32375	-4.63075	-4.87375	-4.18875			0.71875	1.37325	0.72175	-2.27825		-3.50725	-6.53225	-7.24525	-2.50025	-0.23558	-4.36825	-4.36825			-4.18875		-1.97725	-1.77075	-1.32075	-4.53025	-1.75875
TCGA-A7-A0DB-11	3.1395	-0.3865	3.526	-3.6145	-4.136	-3.49	-3.01517	-3.3545	-2.557	-2.88	-2.5975	-2.679	-3.372	-3.353	-3.377	-3.28817	-2.6775	-3.3545	-3.0105	-5.135	-2.9545	-1.8555	-3.395	-3.505	-2.36	-3.379			-0.5535	0.1835	-1.2755	-0.7925		-3.2615	-4.742	-5.963	-3.867	-0.1615	-3.7285	-3.7285			-3.379		-1.582	-1.035	-1.8735	-4.5055	-2.2465
TCGA-BH-A0BJ-11	3.2285	-0.329	3.5575	-4.5685	-4.977	-4.531	-4.2935	-4.6155	-3.477	-3.6155	-3.8205	-3.704	-3.5525	-4.229	-4.079	-3.61717	-4.1255	-4.6155	-3.525	-4.8935	-4.285	-3.7995	-4.238	-4.5115	-4.261	-2.943			-0.31	0.5655	1.8315	-2.458		-0.874	-1.9285	-4.1335	-3.157	-0.5615	-5.1315	-5.1315			-2.943		-1.3995	-0.247	1.277	-2.404	0.8445
TCGA-BH-A0BV-11	3.4635	-0.168	3.6315	-3.692	-4.3105	-3.8465	-4.08933	-4.2675	-3.094	-3.6375	-3.501	-3.583	-2.9155	-3.9655	-3.4725	-3.625	-3.6285	-4.2675	-3.1185	-4.8925	-3.432	-3.23	-3.895	-4.5855	-3.93	-2.323			2.5135	0.625	2.045	-2.509		-0.0795	-2.1555	-5.597	-2.944	-0.27567	-4.6935	-4.6935			-2.323		-1.0635	0.242	0.2205	-2.5285	1.1995
TCGA-BH-A0C0-11	1.93	-0.2225	2.1525	-5.606	-5.984	-5.585	-6.04383	-5.6265	-4.304	-4.4955	-4.2555	-4.0745	-3.925	-5.4995	-4.8595	-3.9505	-5.25	-5.6265	-4.773	-5.503	-4.933	-4.376	-4.943	-5.0805	-4.203	-3.2425			-1.0845	0.1825	0.969	-3.144		-1.797	-1.9965	-4.8845	-2.95	-0.5605	-5.924	-5.924			-3.2425		-1.3975	0.749	0.398	-3.7305	0.9605
TCGA-BH-A0DH-11	2.06	-0.9105	2.9705	-4.517	-5.4635	-5.4305	-5.29517	-5.1795	-4.183	-4.3	-4.238	-3.5175	-4.557	-5.087	-4.9205	-3.3105	-4.6555	-5.1795	-4.6505	-4.8735	-4.54	-4.112	-4.852	-4.5345	-4.0995	-2.9965			-0.9105	2.1615	0.652	-2.2995		-1.4505	-2.7175	-4.4065	-1.899	-1.11617	-5.549	-5.549			-2.9965		-1.9215	-1.158	-0.6695	-2.384	0.687
TCGA-BH-A0DK-11	3.1035	-0.225	3.3285	-3.138	-4.0075	-4.226	-4.064	-4.2335	-3.357	-3.0745	-3.557	-3.1615	-3.1215	-3.741	-3.8805	-2.941	-3.3005	-4.2335	-3.155	-5.1515	-3.6975	-3.8245	-4.307	-3.881	-3.3565	-1.9895			-0.8425	2.5205	0.1925	-3.1115		-1.031	-1.5	-5.125	1.741	0.17833	-4.775	-4.775			-1.9895		0.422	1.671	0.667	-2.1885	1.407
TCGA-BH-A0DQ-11	1.707	-0.1315	1.8385	-4.1265	-4.7555	-4.4595	-4.54933	-4.6485	-3.6945	-3.8425	-3.8395	-3.821	-3.5155	-4.648	-3.9495	-3.59833	-4.1515	-4.6485	-3.4895	-5.6105	-4.1985	-3.858	-3.979	-4.3875	-3.9205	-2.6			-0.163	0.459	1.114	-2.7295		-0.58	-3.121	-5.166	0.3325	-0.14433	-5.1265	-5.1265			-2.6		-0.7845	0.107	0.2035	-2.7555	1.482
TCGA-BH-A0E0-11	2.646	-0.771	3.417	-3.9405	-5.0335	-4.8925	-4.68733	-5.011	-4.1895	-4.045	-4.174	-3.646	-4.129	-4.8955	-4.4445	-3.49467	-3.9685	-5.011	-3.706	-5.2345	-2.8545	-3.9785	-4.8615	-4.551	-3.688	-2.513			-0.435	0.514	0.5	-3.003		-0.8255	-0.842	-6.079	-1.5735	1.77	-5.303	-5.303			-2.513		-0.2645	-0.479	-0.3095	-2.013	2.172
TCGA-BH-A0E1-11	3.113	-0.5425	3.6555	-4.9465	-5.6885	-5.4955	-5.71417	-5.546	-3.8705	-4.068	-4.3215	-3.85	-3.9125	-5.4525	-4.7375	-4.0075	-4.4595	-5.546	-4.597	-5.7935	-3.8175	-4.352	-4.8205	-4.6295	-4.293	-2.612			-1.134	0.2535	0.9745	-3.161		-1.3725	-2.865	-5.1235	-2.714	-0.6315	-5.539	-5.539			-2.612		-0.269	-0.767	-0.4425	-2.1185	2.0665
TCGA-BH-A0H7-11	2.1535	-0.868	3.0215	-2.3735	-3.5265	-3.251	-3.34817	-3.905	-2.6305	-3.49	-3.474	-3.371	-3.434	-3.901	-3.7585	-1.47517	-3.874	-3.905	-2.292	-3.892	-2.699	-3.5715	-3.8555	-3.769	-3.217	-1.0895			0.1415	3.8755	-0.1295	-2.7155		1.13	-3.9475	-3.379	0.606	-0.12017	-4.051	-4.051			-1.0895		-0.904	1.322	0.5915	-1.95	2.2905
TCGA-BH-A0H9-11	3.948	-0.404	4.352	-3.3475	-5.114	-7.34	-6.57333	-5.8515	-4.7445	-3.247	-4.0075	-3.331	-3.2035	-7.436	-4.74	-2.62567	-3.3395	-5.8515	-2.4465	-4.074	-3.629	-5.4035	-3.676	-3.968	-3.5525	-3.864			-0.0135	0.2125	-0.5235	-1.9875		-0.531	-3.9325	-5.133	-1.49	-0.191	-4.907	-4.907			-3.864		-1.553	-0.3765	0.1465	-1.0385	-0.7345
TCGA-BH-A0HK-11	3.319	-0.4505	3.7695	-5.12	-5.7155	-5.3475	-4.97633	-5.4835	-4.0915	-4.455	-3.9805	-3.9185	-3.947	-5.257	-4.484	-4.21867	-4.8615	-5.4835	-4.3345	-6.381	-4.4775	-4.332	-4.87	-4.69	-4.221	-4.282			-1.335	1.6075	-0.771	-2.42		-1.7635	-2.4145	-4.3815	-2.6155	-0.23333	-4.83	-4.83			-4.282		-0.255	-0.5745	1.3925	-2.63	1.443
TCGA-E2-A15M-11	6.247	-0.6395	6.8865	-5.073	-4.7475	-5.7175	-5.73317	-4.9925	-4.3065	-3.2695	-3.665	-3.713	-2.753	-5.361	-4.738	-3.4535	-3.8085	-4.9925	-3.3515	-5.438	-5.7335	-4.011	-5.846	-3.552	-3.772	-3.199			0.39	0.9905	-0.333	-2.2075		-1.171	-3.3635	-3.588	-3.214	-0.33283	-4.4815	-4.4815			-3.199		-0.894	0.197	0.434	-2.855	-0.925
TCGA-BH-A0DP-11	3.018	-0.417	3.435	-5.6265	-4.6815	-5.8715	-6.12517	-5.7085	-4.264	-4.9825	-4.2405	-4.1575	-3.839	-5.797	-5.1035	-3.87383	-5.187	-5.7085	-4.37	-5.8945	-5.4065	-4.562	-4.921	-5.333	-4.4035	-3.246			-1.3865	1.2625	-0.5855	-3.1195		-1.3305	-2.8305	-4.1255	-2.78	-0.03783	-5.626	-5.626			-3.246		-0.6655	-0.227	0.5025	-3.1395	1.0255
TCGA-BH-A0BA-11	4.95	-0.4935	5.4435	-4.059	-4.841	-4.744	-5.33983	-3.953	-3.7275	-3.1955	-4.2275	-3.4195	-3.6185	-4.485	-3.9295	-2.35083	-2.3035	-3.953	-3.94	-3.6865	-4.2405	-2.5645	-3.949	-4.1885	-5.777	-3.4415			-0.6525	-0.773	-0.5315	-2.7115		-0.2805	-3.8385	-3.596	-0.8035	-0.6465	-4.3275	-4.3275			-3.4415		-1.145	-0.9615	-0.4175	-2.5535	0.2005
TCGA-BH-A0AU-11	1.24	-0.764	2.004	-5.3885	-5.6775	-5.3805	-5.24183	-4.9945	-3.8135	-4.4205	-3.643	-3.888	-4.145	-5.767	-4.5845	-4.3785	-5.1885	-4.9945	-4.603	-5.241	-5.287	-4.308	-4.6585	-4.6625	-3.255	-3.0715			-2.3045	-0.0435	0.4625	-2.756		-1.2575	-1.104	-4.176	-3.3885	-2.16817	-5.0925	-5.0925			-3.0715		-1.351	0.085	-0.0025	-2.9475	0.4705
TCGA-BH-A0B5-11	3.7925	-0.466	4.2585	-5.8885	-6.626	-5.6275	-4.786	-4.6145	-4.6035	-5.141	-3.856	-3.429	-5.6255	-5.6095	-5.1335	-3.81967	-6.1815	-4.6145	-4.9525	-7.145	-5.606	-3.744	-4.821	-4.214	-4.081	-3.5725			-2.146	1.2535	-1.637	-1.911		-3.0945	-3.0175	-6.455	-3.6295	-1.63967	-5.4705	-5.4705			-3.5725		-2.9635	-0.419	-4.3625	-4.1545	-5.0655
TCGA-BH-A0B7-11	3.3045	-0.419	3.7235	-4.2825	-4.9135	-4.418	-4.92833	-4.518	-3.423	-3.6105	-3.671	-4.02	-3.0395	-4.783	-3.933	-4.84267	-3.9365	-4.518	-5.2845	-5.115	-4.4685	-3.951	-4.29	-4.147	-3.8195	-2.95			-0.399	0.225	1.117	-3.1285		-1.0915	-3.8415	-5.2995	-4.474	-1.148	-4.8205	-4.8205			-2.95		-1.376	-0.313	-0.1345	-2.645	0.4155
TCGA-BH-A0BQ-11	3.9285	-0.86	4.7885	-3.7455	-4.7495	-4.5585	-4.29167	-4.4225	-3.316	-3.863	-4.227	-4.033	-4.0445	-5.191	-4.2495	-2.79533	-3.1705	-4.4225	-5.0185	-4.3825	-4.382	-4.138	-4.748	-3.9075	-3.963	-3.33			0.8065	3.2885	1.207	-2.5475		-0.669	-3.547	-4.2885	-0.196	-0.53	-4.5915	-4.5915			-3.33		1.0855	-0.1825	0.559	-1.681	1.348
TCGA-BH-A0BS-11	2.5775	-0.683	3.2605	-4.54	-5.582	-4.8125	-4.994	-4.3165	-4.026	-3.923	-3.8965	-4.0345	-3.6705	-5.4285	-4.487	-3.376	-4.1635	-4.3165	-4.123	-4.281	-4.7755	-4.4925	-5.409	-4.494	-3.4125	-2.5695			0.293	0.505	0.7605	-2.7925		-2.133	-2.503	-4.1405	-3.093	-1.537	-5.2545	-5.2545			-2.5695		-1.4675	-0.736	0.5995	-1.9735	1.3045
TCGA-BH-A0BW-11	3.3885	-0.062	3.4505	-2.3695	-3.061	-2.3695	-2.4905	-2.251	-2.488	-2.6295	-1.792	-2.24	-2.602	-2.8935	-2.0895	-2.33183	-2.269	-2.251	-2.9215	-3.965	-3.165	-2.3735	-2.584	-2.364	-1.457	-2.566			-0.1245	2.357	-0.6265	-2.2515		-1.3825	-3.704	-2.096	-2.65	0.1225	-2.6495	-2.6495			-2.566		-0.772	-0.039	1.657	-1.8535	-0.539
TCGA-BH-A0BZ-11	4.704	-0.7385	5.4425	-5.1415	-5.6595	-5.5485	-5.54883	-5.6675	-4.627	-4.4245	-4.015	-4.4515	-5.1655	-5.9295	-5.283	-4.76917	-5.7	-5.6675	-5.6585	-6.4165	-5.944	-4.6355	-4.6165	-5.18	-4.491	-3.6735			-1.1015	1.736	-0.1605	-3.013		-1.56	-4.085	-4.1755	-3.79	-1.47817	-4.7865	-4.7865			-3.6735		-1.5775	-0.564	-0.7265	-3.574	-0.027
TCGA-BH-A0C3-11	1.4215	-0.734	2.1555	-4.6725	-5.1035	-4.619	-4.84933	-4.587	-3.717	-4.2475	-3.7525	-4.16	-4.3225	-4.907	-4.666	-3.80367	-4.803	-4.587	-5.079	-5.267	-4.7975	-4.0525	-4.6885	-4.5185	-4.152	-2.6065			-1.4785	1.002	1.082	-2.7305		-1.584	-2.919	-6.108	-3.2255	-1.10167	-4.829	-4.829			-2.6065		-1.2235	-0.1195	0.151	-2.7395	0.397
TCGA-BH-A0DD-11	4.298	-0.8225	5.1205	-3.9195	-4.7815	-3.4615	-5.13283	-4.819	-3.939	-2.8075	-2.8805	-4.0045	-4.453	-5.079	-4.6565	-4.15683	-4.582	-4.819	-5.265	-6.1225	-5.6435	-4.255	-3.734	-4.342	-3.834	-3.054			-0.7565	0.768	0.361	-1.8745		-2.407	-4.2195	-6.2665	-3.5265	0.08417	-3.8775	-3.8775			-3.054		-3.089	-0.221	-1.0675	-5.1245	-1.5285
TCGA-BH-A0DL-11	1.9865	-0.513	2.4995	-4.4965	-4.7315	-4.1535	-4.47833	-3.999	-3.554	-3.5635	-3.195	-3.212	-3.7055	-4.6205	-4.186	-3.37333	-3.811	-3.999	-3.7875	-5.322	-3.8745	-3.362	-4.0635	-3.7035	-3.5425	-2.3065			-0.878	1.3545	-1.089	-2.4395		-2.069	-3.7665	-3.4315	-3.2185	-0.651	-4.5655	-4.5655			-2.3065		-0.4725	-0.2345	1.2915	-3.5195	0.887
TCGA-BH-A0DO-11	3.2675	-0.7525	4.02	-4.619	-5.303	-5	-5.16483	-4.4835	-3.8405	-4.383	-3.8965	-3.351	-3.9385	-5.142	-4.0685	-4.1095	-4.7805	-4.4835	-4.234	-5.1155	-4.559	-4.039	-4.6985	-4.1125	-3.818	-2.8925			-1.71	0.5105	1.197	-2.5865		-1.409	-2.9965	-4.3475	-3.666	-1.33783	-5.6495	-5.6495			-2.8925		0.0705	0.0115	-0.5375	-3.107	0.3905
TCGA-BH-A0DT-11	3.72625	-0.35525	4.0815	-3.79775	-4.35825	-4.58825	-4.38092	-4.35625	-3.81775	-4.04925	-3.59525	-4.18925	-3.35875	-4.32625	-4.57325	-2.98825	-3.79175	-4.35625	-3.71825	-4.80775	-4.87825	-4.41825	-4.59425	-4.31225	-3.67775	-2.12375			-1.16775	1.21475	0.48475	-2.72225		-1.62525	-3.60725	-4.97075	-1.34275	-1.15792	-4.86375	-4.86375			-2.12375		-0.59675	0.22625	-0.27175	-2.26325	-0.12475
TCGA-BH-A0DV-11	2.728	-0.952	3.68	-4.402	-5.1745	-4.9	-5.5545	-4.562	-3.686	-3.701	-3.7965	-3.8575	-3.5205	-5.22	-3.7375	-4.11717	-4.76	-4.562	-4.8995	-5.109	-3.9595	-4.1585	-4.7365	-4.138	-3.6395	-2.161			-1.2545	-0.549	2.2685	-3.277		-2	-2.9895	-4.2675	-4.0625	-1.13317	-5.3865	-5.3865			-2.161		-0.233	-0.1115	-0.2655	-2.489	0.6925
TCGA-BH-A0H5-11	2.916	-1.112	4.028	-2.325	-5.127	-4.4445	-4.386	-4.256	-3.44	-3.757	-3.4375	-3.27	-4.0785	-4.7285	-4.0775	-3.721	-4.4515	-4.256	-4.0565	-5.903	-3.963	-3.3145	-4.306	-3.4905	-3.6055	-2.8265			-0.708	0.7195	1.679	-2.6575		-1.3715	-2.9135	-5.2815	-2.4685	-1.32	-4.635	-4.635			-2.8265		-0.354	0.717	-0.384	-2.686	1.0915
TCGA-BH-A0HA-11	3.4575	-0.4965	3.954	-6.2365	-6.2955	-5.729	-6.045	-5.014	-3.9345	-4.803	-4.4835	-4.295	-4.725	-6.432	-5.22	-4.469	-6.005	-5.014	-6.325	-6.708	-5.701	-4.728	-5.7195	-5.55	-4.402	-4.327			-1.428	0.7385	-0.0765	-3.2945		-2.15	-3.4505	-4.6135	-1.2775	-0.792	-6.344	-6.344			-4.327		-0.559	-0.241	2.8215	-2.7865	0.6865
TCGA-BH-A18J-11	4.0325	-0.7735	4.806	-4.627	-4.608	-4.1395	-3.30017	-4.013	-3.6355	-3.836	-3.2655	-3.9215	-4.009	-4.3235	-4.779	-2.8155	-3.62	-4.013	-5.16	-4.7905	-3.9835	-4.1485	-4.3	-4.3155	-3.4465	-2.5345			-1.801	0.9295	-0.9465	-2.7205		-1.934	-4.2595	-4.8355	-3.2015	-1.77917	-4.0155	-4.0155			-2.5345		-0.6905	-0.257	-0.2185	-2.1755	-0.141
TCGA-BH-A18K-11	2.442	-0.2575	2.6995	-5.775	-5.9165	-5.6385	-6.02183	-5.379	-4.414	-4.674	-4.2115	-3.984	-4.3465	-5.8465	-5.1075	-4.4435	-5.6975	-5.379	-5.2395	-6.4135	-5.8475	-4.372	-4.539	-4.723	-3.983	-3.817			-0.6485	2.5775	-0.134	-3.1815		-2.097	-3.922	-4.2655	-3.1345	-0.51683	-5.612	-5.612			-3.817		-2.3705	-0.339	-0.097	-3.9745	-0.6775
TCGA-BH-A18L-11	4.063	-1.0355	5.0985	-4.545	-5.7065	-5.0665	-5.33733	-4.7455	-3.9915	-4.3505	-3.8885	-3.7105	-4.757	-5.4465	-4.2285	-3.82833	-4.9765	-4.7455	-5.33	-5.524	-4.812	-4.4355	-5.0125	-4.4345	-4.4855	-3.0605			-0.2065	0.426	1.0855	-2.194		-1.1155	-4.0815	-5.4445	-3.147	-0.99533	-4.971	-4.971			-3.0605		0.118	-0.5715	-0.6735	-3.3075	0.5135
TCGA-BH-A18M-11	3.7305	-1.174	4.9045	-3.6375	-4.733	-4.6085	-3.6255	-4.8665	-3.3995	-3.541	-3.724	-4.017	-3.996	-4.601	-4.367	-3.2905	-4.0975	-4.8665	-5.9945	-5.553	-4.0365	-4.0485	-4.4895	-4.282	-3.001	-2.441			-0.072	5.0055	1.8575	-2.1155		-1.488	-4.1515	-4.885	-0.79	0.71817	-4.6835	-4.6835			-2.441		-0.5385	-0.2685	0.0115	-2.678	0.242
TCGA-BH-A18N-11	3.688	-0.799	4.487	-4.6365	-5.1635	-6.2635	-4.95233	-5.5415	-4.133	-4.2355	-3.792	-4.4665	-3.918	-5.828	-6.113	-3.77033	-4.6345	-5.5415	-3.5915	-5.7035	-5.1095	-5.233	-4.5785	-5.007	-4.395	-4.026			-0.637	1.1245	0.8115	-3.309		-1.8325	-3.498	-3.1225	-2.6395	-0.227	-5.178	-5.178			-4.026		-0.8825	-0.6715	0.16	-2.816	0.53
TCGA-BH-A18P-11	3.4915	-0.9845	4.476	-5.723	-6.13	-6.8155	-6.48417	-5.9585	-4.5755	-4.969	-4.658	-3.9335	-4.797	-6.5135	-6.096	-3.9425	-4.7905	-5.9585	-4.415	-7.0025	-5.772	-5.064	-5.118	-4.9235	-4.675	-4.0315			-0.804	1.055	0.0765	-3.344		-1.4075	-3.553	-6.1055	-1.7855	-1.29783	-6.2005	-6.2005			-4.0315		-1.3855	-0.9825	0.6755	-3.4385	0.247
TCGA-BH-A18Q-11	3.433	-0.7945	4.2275	-4.8705	-5.146	-4.6825	-4.73467	-4.494	-3.622	-4.4145	-3.672	-3.7395	-4.368	-5.026	-4.5205	-3.412	-4.766	-4.494	-3.895	-4.7485	-4.588	-3.8785	-4.7895	-4.181	-3.332	-3.5145			-1.7505	0.6245	0.9195	-2.4895		-2.432	-3.4075	-3.9015	-2.1895	-1.518	-5.0845	-5.0845			-3.5145		-0.1085	-0.0415	-0.023	-2.9995	0.3655
TCGA-BH-A18R-11	3.7505	-1.391	5.1415	-3.959	-4.502	-5.393	-5.06283	-4.8115	-4.307	-3.7675	-3.4745	-3.644	-3.9105	-5.135	-3.879	-3.57117	-6.317	-4.8115	-3.3915	-5.5745	-4.7155	-4.5805	-4.73	-3.957	-2.7435	-3.5815			-1.635	1.822	1.09	-2.54		-1.754	-3.089	-3.8565	-2.8815	-1.8175	-5.064	-5.064			-3.5815		-1.135	0.3355	-1.8745	-3.266	-1.987
TCGA-BH-A18S-11	4.40967	-0.71033	5.12	-4.55633	-5.29483	-4.79633	-4.41517	-4.42133	-3.62533	-4.59233	-3.44033	-3.70533	-4.07933	-5.26883	-4.73333	-3.87917	-4.62133	-4.42133	-5.00383	-5.66783	-4.72983	-4.02283	-4.60033	-4.37383	-3.80183	-3.05983			-2.90933	0.96867	-0.43683	-2.48383		-1.99283	-4.67533	-4.09133	-1.80133	-0.85117	-4.38233	-4.38233			-3.05983		-0.26383	0.24817	1.44917	-1.66283	0.07417
TCGA-BH-A18U-11	3.797	-0.2645	4.0615	-4.759	-4.9625	-5.048	-4.2665	-4.783	-3.8345	-4.015	-3.6515	-3.9585	-3.7965	-4.826	-4.62	-3.7285	-4.497	-4.783	-4.7765	-5.5875	-5.262	-3.9725	-4.5675	-4.1025	-3.8165	-2.391			-0.3955	1.6425	1.4485	-2.673		-1.3655	-3.797	-3.7895	-3.6545	-0.63583	-4.9445	-4.9445			-2.391		-1.2085	-0.011	-0.065	-2.53	-0.1045
TCGA-BH-A18V-11	2.833	-1.174	4.007	-5.948	-6.313	-5.8195	-6.08383	-5.244	-4.4085	-4.9215	-4.0095	-4.1275	-5.0905	-6.3075	-5.1555	-4.76417	-6.543	-5.244	-6.883	-6.1555	-4.7265	-4.715	-5.3385	-5.0245	-4.292	-3.4765			-1.2745	0.2255	-1.301	-2.5155		-1.925	-3.4645	-5.888	-2.601	-1.3215	-5.586	-5.586			-3.4765		0.6265	-0.235	-0.4125	-3.1955	1.908
TCGA-BH-A1EO-11	4.194	-0.869	5.063	-4.8755	-5.3075	-4.9775	-4.58017	-4.1055	-4.2025	-3.822	-2.7685	-3.316	-4.5795	-5.0085	-4.504	-3.60517	-4.1615	-4.1055	-4.7785	-5.8405	-4.8075	-3.6785	-4.246	-3.8215	-3.274	-2.447			-1.558	2.6985	1.927	-0.7615		-2.5225	-3.47	-4.955	-3.5735	0.28983	-4.446	-4.446			-2.447		-2.662	-0.477	-2.0025	-3.811	-2.122
TCGA-BH-A1ET-11	4.2455	-0.992	5.2375	-6.281	-6.2105	-5.9295	-4.49883	-5.084	-4.2065	-4.7105	-4.1115	-4.681	-4.8435	-6.2995	-5.2545	-4.3305	-6.19	-5.084	-5.7055	-5.769	-5.9665	-4.6885	-5.1045	-4.665	-4.211	-3.378			-1.621	0.5245	-0.354	-2.376		-2.7505	-2.097	-4.78	-4.181	-0.9005	-4.8855	-4.8855			-3.378		-2.3065	-0.594	0.1715	-3.374	0.0665
TCGA-BH-A1EU-11	2.697	-1.002	3.699	-5.1715	-5.5805	-5.6345	-6.01617	-5.5065	-4.3225	-4.4095	-3.99	-4.7015	-5.192	-6.3725	-4.962	-4.58083	-5.468	-5.5065	-5.4025	-5.946	-5.8685	-4.8145	-4.8665	-4.925	-4.0115	-3.099			-0.4855	0.195	-0.161	-2.814		-3.0215	-4.488	-4.533	-3.0755	-1.2195	-5.329	-5.329			-3.099		-2.0435	0.081	0.064	-3.235	-0.472
TCGA-BH-A1EW-11	3.8345	-1.017	4.8515	-1.918	-2.7245	-3.075	-3.39733	-3.348	-2.9455	-3.03	-2.379	-3.8965	-3.346	-2.909	-4.305	-1.88067	-3.243	-3.348	-3.719	-3.684	-4.3875	-3.6015	-3.4175	-3.9235	-1.45	-1.0885			-0.268	4.58	2.2575	-2.1595		-1.767	-2.275	-3.737	-1.9825	-0.84867	-3.243	-3.243			-1.0885		-1.156	-0.2085	-1.2505	-0.413	-0.203
TCGA-BH-A1F0-11	4.083	-1.0065	5.0895	-5.411	-5.8285	-5.7005	-4.50533	-4.7105	-4.5255	-4.795	-3.8035	-4.059	-4.4185	-5.9915	-5.069	-3.66967	-5.71	-4.7105	-5.3715	-5.532	-5.503	-4.616	-4.6795	-4.6595	-3.98	-3.069			-2.558	0.125	-0.1705	-1.885		-2.3515	-3.8035	-4.563	-3.172	-0.86367	-5.097	-5.097			-3.069		-2.7615	-0.1305	0.9585	-3.0235	-0.3245
TCGA-A1-A0SH-01	1.0275	-0.3275	1.355	-2.1205	-4.1525	-3.156	-3.26983	-3.745	-2.569	-3.0975	-3.024	-3.0355	-3.203	-3.517	-3.8315	-2.24917	-2.815	-3.745	-2.314	-4.8215	-3.112	-3.0785	-3.582	-3.9005	-2.481	-1.836			5.242	7.946	9.1955	1.8465		-0.0715	-0.4645	0.076	1.193	4.79683	-4.1625	-4.1625			-1.836		-0.4015	-0.251	2.238	-2.15	1.525
TCGA-A1-A0SJ-01	2.1	-0.458	2.558	-0.646	-1.6395	-1.3945	-1.84867	-2.1555	-1.469	-1.947	-2.3095	-2.711	-1.951	-1.3285	-1.041	-0.908	-1.1395	-2.1555	-1.5615	-3.243	-1.451	-1.353	-2.7505	-2.5045	-1.677	-0.518			5.1475	6.673	4.8	-0.615		1.5695	-1.3125	-3.3615	0.719	1.798	-2.376	-2.376			-0.518		0.7195	0.0615	0.483	-0.8145	2.907
TCGA-A1-A0SO-01	0.672	0.0125	0.6595	0.2595	-0.45	-0.4895	0.98533	-0.029	0.3805	-0.723	0.322	0.753	0.418	-1.723	-0.1045	0.572	-0.765	-0.029	1.271	-1.097	-0.443	-0.665	-0.8795	0.956	-1.9825	-1.3675			3.018	4.2965	3.318	-1.684		0.862	-3.7945	-4.432	0.6515	0.184	-0.5375	-0.5375			-1.3675		-1.154	3.4995	-0.056	0.251	1.486
TCGA-A1-A0SP-01	0.802	0.3305	0.4715	0.325	-1.4905	-1.781	-0.637	-0.962	-1.675	-1.386	-0.759	-1.7235	-0.798	-1.9085	-0.819	-0.39133	-1.147	-0.962	-0.3785	-1.5965	0.2755	-0.929	-1.453	-1.5105	-2.479	0.0065			2.189	6.308	5.243	-0.388		-1.617	-2.3145	-1.7615	1.2365	1.05133	-0.7415	-0.7415			0.0065		0.4885	-1.257	1.3445	-0.4565	1.1935
TCGA-A7-A0CJ-01	0.2735	-0.1185	0.392	-1.0775	-1.8985	-2.452	-1.1135	-1.799	-1.006	-2.12	-0.607	-1.335	-1.601	-2.31	-1.6765	0.2415	-1.839	-1.799	-0.778	-2.6065	-2.034	-1.3785	-2.682	-1.951	-2.564	-0.365			0.6545	5.239	5.0745	-0.101		0.0495	0.926	-1.4775	0.103	0.92283	-4.452	-4.452			-0.365		0.406	-0.897	4.0025	-1.2135	2.4645
TCGA-A7-A0DA-01	0.535	0.154	0.381	0.2065	-0.4695	-1.1485	-0.7335	-1.898	0.08	-2.468	-1.47	-1.223	-1.425	-1.394	-0.987	-2.3005	-2.277	-1.898	-1.3205	-3.835	-1.452	-1.9965	-1.6195	-1.5215	-1.74	-1.73			5.2095	5.929	6.9925	-0.4165		-2.155	0.637	-0.552	-3.804	4.27817	-2.2135	-2.2135			-1.73		-0.4535	0.698	3.853	-2.2195	-1.326
TCGA-A7-A13D-01	1.0385	-0.572	1.6105	0.219	-0.6305	-1.0645	-0.07233	-1.475	-0.998	-1.3045	-0.924	-1.673	-2.274	-3.205	-1.2195	-1.503	-1.866	-1.475	-1.788	-2.561	-0.4435	-1.4495	-1.74	-0.055	-1.1535	0.2595			2.437	7.3225	7.6285	2.2065		-0.885	1.7	-0.145	-3.211	1.38567	-1.7775	-1.7775			0.2595		-0.357	0.4885	3.667	2.1655	0.1585
TCGA-A7-A13E-01	2.76	-0.1905	2.9505	-0.0295	-0.986	-2.0395	-0.05883	-1.471	-1.5345	-2.0615	-1.065	-1.0295	-2.0955	-0.8115	-2.4755	-1.53917	-1.6845	-1.471	-3.265	-2.7425	-2.4505	-1.5185	-1.3715	0.1405	-1.059	-0.3395			0.829	6.097	6.1015	0.154		-0.248	-1.0855	0.0805	-4.0515	1.0605	-0.982	-0.982			-0.3395		-1.3285	-0.747	-0.1175	1.607	0.72
TCGA-A7-A13F-01	1.8755	-0.022	1.8975	0.42	-1.569	-0.951	-2.4445	-1.8385	-0.3165	-0.0755	-0.9015	-0.9735	-1.2085	-0.806	0.3145	-1.1555	-0.33	-1.8385	-2.4455	-2.717	-1.2105	-0.8475	-1.348	-0.988	-0.4215	-0.713			-0.011	6.0225	3.614	-0.7925		3.094	-1.4785	-3.2165	-2.014	1.87883	-3.2125	-3.2125			-0.713		-0.3855	4.691	2.7665	-1.4935	1.509
TCGA-A8-A08G-01	0.7315	0.265	0.4665	-0.0105	-0.945	-0.338	-2.38367	-2.189	-0.577	-1.2115	-0.895	-1.667	-1.541	-2.657	-1.2045	-1.234	-2.751	-2.189	-2.7835	-1.9495	-1.7955	-1.3575	-2.274	-1.953	-1.506	-0.554			4.8525	7.5045	6.758	-0.3305		2.436	-2.3855	-1.083	0.264	3.10433	-2.06	-2.06			-0.554		1.116	4.698	-0.172	-2.5225	3.0045
TCGA-AN-A03X-01	1.89875	-0.47075	2.3695	-0.66975	-2.92475	-2.93175	-3.16492	-2.77375	-2.46275	-2.72425	-2.54775	-2.56875	-2.92525	-2.20725	-2.38325	-0.44625	-1.22925	-2.77375	-1.73825	-4.41775	-2.26175	-2.33225	-3.63575	-2.71775	-2.41275	-1.50575			6.30725	8.08275	8.35675	1.91575		-0.23125	-0.42075	0.53075	2.99875	3.34675	-3.21875	-3.21875			-1.50575		1.34375	3.60575	1.56225	-1.60375	1.86425
TCGA-AN-A03Y-01	0.189	0.9795	-0.7905	1.865	-0.7265	-0.9285	-2.406	-1.628	-1.0805	-0.4725	-1.074	-1.1145	-1.1025	-1.819	-2.451	0.48167	-2.066	-1.628	-2.2855	-2.248	-1.6405	-0.2225	-1.9345	-1.8735	-1.484	-1.6485			2.647	7.466	5.839	-1.059		0.24	-1.5755	-1.4885	-0.5365	2.48567	-1.5435	-1.5435			-1.6485		0.384	-0.837	1.1665	-1.589	2.49
TCGA-AN-A041-01	0.2685	-0.0725	0.341	-1.209	-2.3425	-2.0845	-2.7345	-3.0425	-1.929	-1.5865	-2.2075	-2.352	-2.7065	-2.94	-2.4235	-1.2775	-1.947	-3.0425	-0.9825	-2.698	-2.402	-2.3635	-2.7435	-2.285	-2.2625	-2.2255			3.9035	7.9615	7.8365	1.253		3.0415	1.0685	-0.266	-0.6205	3.09883	-2.381	-2.381			-2.2255		0.0585	4.335	0.1765	-1.6345	1.9345
TCGA-AN-A046-01	2.754	0.0395	2.7145	-1.515	-3.104	-2.981	-2.86117	-3.379	-2.732	-2.5575	-2.162	-2.368	-2.5955	-3.005	-2.0555	-1.8855	-2.5675	-3.379	-1.5875	-3.301	-3.2345	-1.8905	-3.538	-3.091	-2.6505	-1.955			6.3185	7.5795	6.959	0.626		-1.761	-2.406	-2.044	1.5195	3.1015	-4.336	-4.336			-1.955		0.789	0.0845	2.5135	-2.538	1.8305
TCGA-AN-A049-01	1.3015	0.0295	1.272	-0.504	-2.339	-1.1605	-2.318	-1.7545	-1.462	-1.2115	-2.133	-1.2475	-1.811	-2.779	-1.6875	1.00733	-1.761	-1.7545	-2.496	-2.4605	-1.531	-1.5515	-2.4225	-2.3765	-1.59	-1.657			4.639	6.999	6.6825	0.9605		1.921	-0.778	-0.7385	-2.264	2.68533	-2.6465	-2.6465			-1.657		1.16	4.3955	1.1165	-1.714	2.2585
TCGA-AN-A04A-01	1.178	-0.2525	1.4305	-1.6095	-2.211	-2.985	-2.37267	-2.9685	-1.121	-2.589	-2.519	-1.7405	-2.799	-2.8745	-1.9725	-1.01967	-1.406	-2.9685	-1.5455	-3.744	-1.8075	-2.246	-3.236	-2.2065	-2.029	-1.125			4.688	7.3545	7.192	1.9005		-0.2125	-1.1925	0.007	2.617	2.30533	-3.2215	-3.2215			-1.125		0.986	4.891	1.907	-0.955	2.005
TCGA-AN-A04C-01	2.664	0.163	2.501	-0.5725	-1.279	-2.016	-0.57583	-0.3195	-1.621	-1.847	-0.019	-0.6605	-0.954	-3.382	-1.8145	0.10717	-1.9905	-0.3195	-0.1075	-3.77	-0.7285	-1.3035	-1.679	-0.636	-1.3825	-0.001			3.3205	4.214	3.7915	-0.818		0.297	-1.34	-2.123	3.365	0.91517	-2.8265	-2.8265			-0.001		0.096	5.4215	2.637	0.2565	1.3695
TCGA-AN-A04D-01	0.2335	0.3785	-0.145	1.147	0.466	0.2235	-0.39083	-1.0185	0.379	-0.962	0.9965	-0.359	0.129	-1.006	-1.2575	2.15483	0.0025	-1.0185	1.063	1.2005	1.25	0.002	-2.5625	-0.339	-0.7645	1.302			3.577	4.7185	3.244	-1.4185		2.118	-2.8495	-1.6725	-3.5295	0.20883	-0.756	-0.756			1.302		0.2685	-1.414	3.588	0.3325	1.448
TCGA-AN-A0AJ-01	0.4835	0.1045	0.379	0.3955	-0.2055	-0.2055	-0.68433	-0.364	-0.867	-0.94	-0.527	-1.063	-0.712	-1.7815	-1.389	1.709	-1.6045	-0.364	-1.565	0.6075	-1.4465	-0.3	-1.2665	1.749	-0.871	-1.2815			1.183	7.048	6.9625	0.055		3.1995	-0.503	-2.9745	3.2135	2.81067	-2.1345	-2.1345			-1.2815		0.4945	0.0045	2.334	0.1675	2
TCGA-AN-A0AK-01	1.26525	0.61125	0.654	0.57025	-0.44125	0.01175	-1.17425	-1.08325	-0.19925	0.51075	-0.29575	-0.78275	-0.43125	-0.70175	0.38925	0.34542	0.07675	-1.08325	-1.74475	-1.33825	-3.32325	-0.21425	-0.92225	-1.37125	-0.09175	-0.15975			2.85925	5.80675	5.20725	-0.86925		1.82725	-1.29625	-2.34975	1.33675	1.79708	-1.94525	-1.94525			-0.15975		0.02275	3.08075	0.41125	-1.63325	1.83875
TCGA-AN-A0AL-01	2.284	-0.6575	2.9415	-1.342	-0.904	-1.623	-0.5675	-0.2175	-0.6175	-1.3275	-1.0925	-0.448	-1.378	-1.017	-1.183	-0.2135	-0.297	-0.2175	-2.603	-1.2105	-0.259	-1.0245	-1.4205	-1.033	-1.1875	-0.1435			4.4855	8.095	6.7595	0.8545		2.2525	-0.045	-0.1735	-2.0055	2.21883	-2.282	-2.282			-0.1435		0.4805	1.9305	0.481	1.255	2.092
TCGA-AN-A0AM-01	0.445	-0.4255	0.8705	-0.494	-1.5015	-2.5895	-1.39167	-2.4195	-0.325	-1.465	-1.5205	-1.949	-2.006	-2.3855	-1.2185	-0.55367	-1.7385	-2.4195	-1.5345	-2.894	-0.845	-1.0965	-1.7635	-1.5895	-0.893	-1.148			4.6055	7.87	7.4965	2.281		1.452	-1.6695	0.7405	1.629	1.314	-2.5495	-2.5495			-1.148		0.468	-0.2355	0.328	-1.1125	2.023
TCGA-AN-A0AR-01	-0.703	-0.1485	-0.5545	1.1215	-1.029	-2.305	-0.17083	-1.9995	-0.321	-1.489	-1.408	0.6825	-0.133	-1.682	-1.555	-1.52717	-1.387	-1.9995	-1.6825	-1.8925	-0.95	-1.108	-1.7775	1.1725	-0.2735	-0.6685			-0.351	4.7615	4.571	-0.268		0.817	-1.561	-3.2435	0.668	0.43217	-1.7055	-1.7055			-0.6685		-0.095	-0.6535	2.339	2.0125	1.1775
TCGA-AN-A0AS-01	0.61	-0.6795	1.2895	-1.097	-2.0465	-3.0505	-2.5975	-2.766	-2.109	-1.8465	-1.9795	-2.626	-3.124	-3.94	-3.606	-1.38517	-3.41	-2.766	-1.504	-4.4405	-2.598	-1.9345	-3.099	-2.83	-1.7425	-2.195			5.5095	8.9015	9.1265	1.607		0.6495	0.1795	1.8785	-1.308	3.27017	-3.1655	-3.1655			-2.195		-0.001	3.2035	4.0345	-0.8675	1.0855
TCGA-AN-A0AT-01	-0.4495	0.0595	-0.509	-0.5485	-0.833	-1.332	-0.3725	-0.6405	0.1895	-0.766	0.2305	-0.3465	-0.2055	-1.602	-1.4445	0.3695	-0.9615	-0.6405	0.467	-0.8965	-0.9185	-0.6135	-1.08	1.0315	-0.622	-0.4335			2.569	5.916	4.694	0.073		1.6595	-2.0705	-0.719	-3.6615	1.11317	-1.016	-1.016			-0.4335		1.294	-1.3545	1.4145	0.0655	0.96
TCGA-AN-A0FD-01	1.577	0.0885	1.4885	-0.513	-2.53	-2.8895	-1.8415	-2.9045	-2.5705	-3.4625	-1.8485	-1.4305	-2.2655	-3.9485	-1.69	-1.21883	-2.003	-2.9045	-1.5965	-1.646	-2.1215	-1.7605	-2.87	-2.6795	-2.0105	-3.2735			4.582	8.043	7.4475	1.3235		2.666	0.7685	-2.7325	1.4765	2.49417	-2.7135	-2.7135			-3.2735		0.9365	0.7885	1.3315	-1.38	2.9875
TCGA-AN-A0FF-01	2.25825	0.29975	1.9585	0.05325	-0.67675	-1.47925	-1.70142	-1.86375	-0.86875	-2.65475	-1.25975	-1.17725	-2.37625	-1.68075	-2.53275	-1.12742	-1.22175	-1.86375	-0.39325	-1.92725	-1.78225	-1.26475	-2.19475	-3.16375	-1.66775	-0.79125			5.86075	6.67475	5.85725	0.07625		2.87425	-1.80975	-2.76825	2.37375	1.28758	-2.04675	-2.04675			-0.79125		1.06775	2.30525	-0.10875	-0.63325	2.49625
TCGA-AN-A0FJ-01	0.181	0.8455	-0.6645	0.243	-1.3915	-0.837	-0.77633	-2.0635	-0.463	-0.1015	-0.9445	-0.9355	-0.6405	-1.653	-1.038	-0.561	-0.9765	-2.0635	-2.483	-1.435	-1.026	-0.6715	-1.959	-0.753	-1.544	-0.844			2.206	6.08	6.1465	-1.342		-0.634	0.8785	-1.7775	1.134	1.34633	-0.9365	-0.9365			-0.844		-0.873	-1.39	0.5035	0.5795	0.3855
TCGA-AN-A0FK-01	1.386	-0.2405	1.6265	-0.111	0.4405	-2.3175	-2.98333	-2.6965	-2.3575	-1.717	-2.3905	-1.9535	-2.5125	-2.3115	-2.605	-0.01933	-0.4385	-2.6965	-2.1605	-2.6535	-2.8	-2.129	-3.2655	-2.606	-1.992	-1.5275			2.1505	7.764	6.3365	0.181		2.1825	-0.1405	-2.51	3.76	2.04033	-2.629	-2.629			-1.5275		1.072	4.5575	-0.6765	-0.565	3.2105
TCGA-AN-A0FL-01	0.453	-0.2035	0.6565	0.088	-2.3245	-2.964	-2.97967	-2.121	-2.649	-2.4395	-2.1995	-1.408	-2.6845	-3.099	-3.6235	-0.70967	-1.719	-2.121	-1.6845	-4.4665	-0.8055	-2.4555	-3.171	-0.613	-1.688	-2.354			2.0095	5.1265	3.596	-0.894		1.1955	1.6955	-2.6645	-3.3915	-0.08167	-3.263	-3.263			-2.354		1.2555	0.2375	0.108	-0.153	1.951
TCGA-AN-A0FN-01	3.6695	-0.401	4.0705	-1.8325	-3.3235	-3.096	-3.00133	-2.977	-2.5295	-3.644	-2.547	-2.569	-3.302	-3.6415	-3.4365	-1.69533	-2.4205	-2.977	-2.476	-3.0295	-3.701	-2.401	-3.445	-3.2155	-2.8955	-2.016			5.3175	8.353	8.451	1.63		1.8765	-0.032	0.622	-1.7705	4.96233	-3.485	-3.485			-2.016		0.8605	1.9125	2.126	-1.5045	1.3995
TCGA-AN-A0FS-01	3.439	-0.4005	3.8395	-1.2925	-3.077	-3.1355	-3.40433	-3.336	-3.049	-2.9365	-2.8955	-2.9015	-3.2505	-4.41	-3.6885	-1.24633	-2.993	-3.336	-3.683	-3.0085	-2.8685	-3.2225	-3.7235	-3.4025	-3.5515	-2.429			1.1035	7.7895	5.0815	-0.4625		0.5865	-0.156	-5.487	0.9895	2.30367	-3.683	-3.683			-2.429		0.5735	-0.155	2.3815	-1.976	1.8925
TCGA-AN-A0FT-01	3.251	-0.7675	4.0185	0.035	-2.749	-1.81	-3.76583	-2.8085	-3.075	-2.171	-2.4975	-2.3785	-3.8925	-4.216	-4.549	1.20883	-4.013	-2.8085	-1.6495	-3.361	-2.5065	-2.4005	-4.3885	-3.067	-3.327	-1.5475			3.3695	8.237	7.1705	1.0855		2.8305	-0.7275	0.336	4.1915	1.08617	-1.421	-1.421			-1.5475		3.1185	2.882	1.434	-1.3065	3.2065
TCGA-AN-A0FV-01	-0.2325	-0.1475	-0.085	-0.9495	-2.3595	-2.5315	-1.74	-2.5195	-2.2425	-0.1045	-1.205	-2.195	-2.41	-2.4605	-1.956	-0.42933	-1.8535	-2.5195	-1.4	-3.0335	-1.735	-2.2715	-3.3625	-2.802	-1.358	-1.322			4.5	7.6375	7.785	1.3725		-0.2165	0.8875	-0.341	3.3675	1.86267	-1.5615	-1.5615			-1.322		1.416	4.983	0.506	-1.129	2.173
TCGA-AN-A0FW-01	1.022	0.0005	1.0215	1.0725	-0.9865	-2.5205	-1.54333	-2.718	-0.7915	-2.9145	-1.7915	-2.6425	-1.9455	-2.2375	-1.826	-0.84967	-0.442	-2.718	-1.0995	-1.7935	-1.9235	-1.5595	-2.648	-2.82	-1.577	-1.4925			-0.5495	7.003	3.5435	-0.224		0.7285	-3.161	-3.738	-3.2935	1.96267	-1.8185	-1.8185			-1.4925		0.949	3.359	-0.428	-1.77	2.2505
TCGA-AN-A0FX-01	0.8495	-0.014	0.8635	-0.3195	-0.933	-2.141	-0.4625	-1.732	-1.1725	-1.8565	-0.645	-2.222	-1.2405	-2.4845	-2.5755	0.05317	-1.1505	-1.732	-0.9535	-1.442	-1.3775	-0.8915	-2.4215	-1.7375	-2.84	-0.1875			4.36	7.1975	6.9155	0.385		1.534	1.1615	-0.686	-3.8255	1.78017	-1.9735	-1.9735			-0.1875		-1.2945	-0.8615	3.195	-0.9615	0.535
TCGA-AN-A0FY-01	0.5155	0.012	0.5035	-0.113	-0.854	-1.5285	-0.80883	-0.709	-1.1875	-1.701	-0.8615	-1.67	-1.279	-2.7785	-2.8035	1.38017	-2.133	-0.709	0.0065	-0.783	-0.948	-1.1415	-2.634	-1.5845	-1.6145	-1.641			4.396	7.9785	8	1.2445		2.4595	0.0675	-0.393	-0.4785	2.25017	-2.1215	-2.1215			-1.641		1.042	1.621	3.3985	-0.248	1.7875
TCGA-AN-A0FZ-01	-0.10475	-0.25375	0.149	-1.02375	-2.26575	-2.71825	-1.52025	-2.49275	-1.77275	-2.76125	-1.84875	-2.73425	-3.06125	-3.43125	-3.24275	-0.96958	-2.40525	-2.49275	-2.14025	-1.33875	-1.20175	-2.16525	-3.20475	-2.37725	-2.05975	-1.62275			4.02425	8.08425	7.50425	1.04375		3.55175	0.56775	-1.13025	0.74775	1.97442	-1.34425	-1.34425			-1.62275		1.57975	0.29475	-0.29975	-2.69075	1.99425
TCGA-AN-A0G0-01	0.7585	-0.1705	0.929	0.3255	-0.22	-1.1795	-0.3855	-0.3675	-0.37	-0.469	-0.1425	-0.2875	-0.71	-0.722	-1.1515	0.3495	-0.4395	-0.3675	-1.061	-1.7985	-0.5965	-1.6605	-0.88	-0.4275	-0.1465	0.436			5.147	7.453	8.1915	0.3605		-0.614	-0.7105	0.716	-4.153	0.6805	-1.1905	-1.1905			0.436		1.234	-1.3875	-0.7125	1.038	1.7905
TCGA-AN-A0XL-01	3.1595	-0.1515	3.311	-0.1835	-2.094	-1.1995	-2.40017	-3.1	-2.0455	-2.579	-1.5755	-2.532	-1.3845	-3.452	-2.579	-0.32317	-3.289	-3.1	-1.0305	-3.246	-1.523	-1.843	-2.8725	-3.2165	-3.2385	-1.385			1.6785	6.7245	4.723	-0.508		0.154	-1.351	-2.227	-4.1175	2.13217	-3.426	-3.426			-1.385		1.3415	0.619	0.771	-1.7325	1.6525
TCGA-AN-A0XN-01	2.6185	0.0765	2.542	-0.6335	-2.8235	-2.362	-2.48067	-3.0195	-2.5615	-2.4425	-2.1245	-1.3445	-2.1685	-3.721	-2.4975	-1.359	-3.17	-3.0195	-1.8195	-3.928	-2.0515	-2.377	-3.058	-2.624	-2.367	-1.34			7.036	8.7685	9.2655	2.779		-0.885	0.4575	2.6585	2.5455	3.26167	-3.6525	-3.6525			-1.34		-0.6845	0.366	3.1795	-2.08	-0.497
TCGA-AN-A0XO-01	1.2905	0.2245	1.066	-0.813	-2.8885	-2.1165	-2.66767	-3.7905	-2.2475	-2.314	-2.339	-1.464	-2.1845	-3.37	-1.995	-0.74667	-2.917	-3.7905	-1.8935	-3.5025	-3.4445	-1.4695	-2.7585	-2.387	-2.1175	-1.984			5.3055	7.6545	7.57	1.092		0.74	-0.174	-0.453	1.2685	2.236	-3.94	-3.94			-1.984		0.4975	0.867	3.3695	-1.019	2.115
TCGA-AN-A0XP-01	0.595	-0.363	0.958	-2.3355	-3.521	-2.904	-3.683	-3.5035	-2.577	-3.186	-3.087	-2.8645	-4.1035	-3.5995	-2.751	-1.58133	-2.1735	-3.5035	-2.9915	-3.1635	-3.2225	-2.82	-3.873	-3.8415	-3.3065	-1.699			5.1105	8.0335	7.405	1.425		1.6395	0.325	-0.431	-0.615	2.05567	-3.515	-3.515			-1.699		1.078	4.9025	1.4055	-1.939	2.3015
TCGA-AN-A0XR-01	0.2085	0.023	0.1855	-0.1915	-1.4115	-1.983	-1.71717	-1.7095	-0.565	-1.6515	-1.3495	-0.5765	-1.9695	-1.5925	-1.732	0.26017	-1.0795	-1.7095	-0.784	-1.1625	-2.053	-1.002	-2.0075	-1.632	-2.1305	-0.4065			3.586	7.457	7.146	0.869		2.5845	0.365	-1.6095	4.727	2.09483	-2.4225	-2.4225			-0.4065		0.8615	2.824	1.4995	-0.5065	2.0695
TCGA-AN-A0XS-01	1.2355	-0.0795	1.315	-2.5285	-3.8655	-2.631	-3.05183	-3.4515	-2.747	-3.2105	-2.3135	-3.0395	-3.2505	-4.1325	-4.07	-1.2815	-3.2135	-3.4515	-2.3735	-3.989	-3.564	-2.6175	-3.6055	-3.935	-2.3165	-2.5445			3.649	8.2255	7.8085	1.552		0.988	-1.486	1.078	0.89	2.1365	-4.0125	-4.0125			-2.5445		0.0705	-0.7305	3.588	-2.191	1.879
TCGA-AN-A0XT-01	0.846	-0.0905	0.9365	-2.256	-3.5505	-3.7235	-3.7705	-4.1185	-1.956	-3.55	-2.635	-2.559	-3.899	-3.932	-3.315	-2.68983	-3.1645	-4.1185	-2.702	-3.883	-2.7585	-3.14	-3.6755	-3.4775	-2.976	-2.1285			-0.5955	5.7945	2.9845	-1.405		-0.1125	1.5365	-4.009	-3.048	1.23083	-5.1005	-5.1005			-2.1285		-0.058	2.166	-0.601	-2.3715	2.424
TCGA-AN-A0XU-01	0.839	-0.007	0.846	-0.5845	-0.5425	-0.771	-0.03317	-0.7835	-0.1505	-0.923	-1.161	-0.18	-0.172	-1.481	-1.03	-0.03383	-1.2615	-0.7835	-0.673	-2.3495	-0.281	-0.929	0.062	-0.203	-0.308	0.2755			0.7825	5.887	5.327	0.09		1.9705	-1.7355	-1.2725	-0.1375	0.6215	-1.5915	-1.5915			0.2755		1.297	-0.512	3.296	-0.133	0.369
TCGA-AN-A0XV-01	2.812	0.1085	2.7035	-1.2455	-2.6005	-2.1155	-2.28917	-2.7475	-1.669	-2.848	-1.1795	-1.9135	-2.442	-2.8735	-2.715	-0.17083	-3.185	-2.7475	-1.3905	-3.989	-2.519	-1.703	-2.6735	-2.671	-1.7515	-0.843			4.3855	6.5325	6.061	0.161		-1.26	-2.621	-0.2155	2.3145	2.07817	-3.7285	-3.7285			-0.843		0.357	1.461	1.7045	-1.841	1.2515
TCGA-AN-A0XW-01	2.346	0.531	1.815	-0.1315	-1.681	-1.156	-1.43517	-1.681	-1.113	-2.236	-1.4575	-1.8245	-0.8205	-1.783	-1.699	-1.12717	-1.4325	-1.681	-0.488	-1.7655	-2.2645	-0.789	-2.1275	-1.914	-0.807	-2.265			5.1835	7.917	8.1175	1.0895		1.0065	-0.608	-0.1515	1.3095	4.18417	-1.511	-1.511			-2.265		0.098	3.259	2.6445	-0.848	1.119
TCGA-AO-A03L-01	1.074	0.1	0.974	-0.438	-1.627	-0.151	-1.73383	-1.619	-0.092	-0.39	-1.08	-0.904	-1.035	-1.479	-0.832	-0.62317	-0.161	-1.619	-1.0155	-1.658	-1.866	-0.259	-1.516	-1.522	-0.6585	-0.5475			4.7575	7.386	4.2965	0.7605		0.6965	-2.4525	-2.3165	2.465	2.93217	-2.553	-2.553			-0.5475		1.34	4.6545	2.158	0.4075	3.166
TCGA-AO-A03M-01	1.4445	-0.316	1.7605	-1.271	-2.1735	-2.1075	-1.96167	-2.244	-2.09	-2.022	-1.534	-2.0245	-2.0755	-2.218	-0.986	-0.34333	-1.1915	-2.244	-1.285	-2.777	-0.8615	-1.2825	-2.969	-1.9265	-2.0135	-0.181			-0.3395	6.2225	4.357	-0.412		-0.0515	-1.766	-3.809	0.3155	1.29833	-3.4295	-3.4295			-0.181		1.9685	-0.5565	2.076	-1.866	1.4605
TCGA-AO-A03N-01	1.261	-0.5595	1.8205	0.4395	-1.6835	-1.5425	-2.17983	-2.044	-1.617	-2.396	-2.0935	-2.2315	-1.5615	-3.671	-3.593	0.6425	-1.339	-2.044	-1.488	-0.706	-1.9385	-0.5945	-2.6235	-2.5685	-0.2105	-1.233			4.417	8.2375	7.982	1.698		1.9365	2.2265	-0.418	4.848	1.3025	-2.232	-2.232			-1.233		1.011	3.1985	0.953	0.4915	2.39
TCGA-AO-A03U-01	1.827	-0.552	2.379	-3.546	-3.7945	-3.569	-3.40917	-3.404	-2.8105	-3.0525	-2.947	-3.0355	-3.4415	-4.554	-3.7385	-2.91017	-2.6765	-3.404	-2.259	-4.0715	-3.8115	-3.038	-3.455	-3.775	-2.391	-2.6045			2.378	7.1035	6.991	0.855		-2.2975	-0.414	-0.9415	-3.981	2.38283	-3.2335	-3.2335			-2.6045		-0.092	0.4235	1.572	-2.888	1.581
TCGA-AO-A03V-01	0.882	-0.152	1.034	-1.961	-3.616	-3.2475	-2.91133	-3.6365	-1.3575	-3.9835	-3.364	-2.238	-2.315	-3.879	-3.2555	-0.83667	-3.5155	-3.6365	-2.194	-4.392	-2.41	-2.0225	-3.9515	-2.556	-2.9055	-2.372			2.063	6.016	3.9825	-0.2645		0.686	-0.5275	-3.949	0.928	3.07733	-4.2565	-4.2565			-2.372		1.3055	2.6215	3.1845	-2.134	2.293
TCGA-AO-A0JI-01	1.5645	-0.358	1.9225	-1.229	-1.627	-2.104	-2.1625	-1.947	-0.755	-1.543	-1.227	-1.5135	-2.0095	-0.9285	-2.7635	-0.56083	-0.7765	-1.947	-0.688	-3.3255	-3.026	-2.375	-2.6615	-2.1705	-2.7305	-0.1435			-0.0225	5.7055	2.257	-2.463		1.7295	-1.4165	-3.3235	2.6115	-0.13217	-2.38	-2.38			-0.1435		-0.6285	-1.583	-1.3275	-0.649	1.625
TCGA-AO-A126-01	1.3275	-0.5415	1.869	-2.0525	-3.047	-2.032	-2.59617	-2.527	-2.3675	-3.034	-2.1195	-2.212	-2.6075	-4.059	-4.9525	-0.83317	-3.666	-2.527	-1.945	-3.2465	-2.2835	-2.05	-3.899	-4.259	-3.1965	-1.647			2.024	8.191	8.214	0.9075		0.3005	-0.9285	-1.357	2.6575	3.24417	-4.0745	-4.0745			-1.647		1.088	-1.1555	1.97	-1.7895	2.0225
TCGA-AO-A128-01	1.599	-0.1865	1.7855	-0.882	-1.2775	-1.8935	-1.26083	-1.5685	-1.709	-1.0445	-1.429	-1.053	-1.5475	-1.9525	-1.705	-0.57017	-0.504	-1.5685	-0.712	-2.438	-0.9175	-1.6545	-2.437	-1.271	-0.6225	-1.1215			-0.9745	4.6345	3.833	-0.456		-2.1685	-1.72	-1.603	-3.05	1.34817	-1.892	-1.892			-1.1215		1.017	-0.371	0.037	-2.673	0.388
TCGA-AO-A129-01	1.022	0.09	0.932	0.52	0.2115	-1.7335	-0.5915	-0.4075	-0.256	-1.6295	-1.08	-0.5915	-0.1505	-2.321	-3.267	0.04517	-1.875	-0.4075	-0.1085	-1.812	-0.1665	-0.723	-1.9615	0.2295	-0.979	-0.6955			1.864	5.7175	5.672	0.281		1.1515	-0.2835	-1.517	-1.705	1.29417	-1.7775	-1.7775			-0.6955		2.0515	-0.7835	2.427	0.3615	0.755
TCGA-AO-A12A-01	2.269	0.083	2.186	-1.1785	-3.351	-3.161	-2.87133	-3.0585	-2.193	-2.849	-2.545	-2.072	-2.761	-3.686	-2.9725	-2.041	-2.138	-3.0585	-3.816	-3.3405	-3.791	-1.9845	-3.7245	-2.724	-2.5185	-2.2165			2.055	6.5135	6.0235	0.1145		-0.586	-0.916	-3.196	0.9975	3.10867	-3.2185	-3.2185			-2.2165		-0.453	0.832	2.588	-1.943	1.66
TCGA-AO-A12B-01	0.642	-0.6675	1.3095	-1.21	-2.12	-2.1385	-2.47033	-2.72	-1.638	-0.9285	-2.645	-2.079	-2.6735	-2.3475	-2.7065	-0.56967	-0.909	-2.72	-2.1685	-2.5435	-2.2985	-2.358	-2.5175	-3.77	-3.14	-1.3065			1.1475	4.986	3.3735	-2.0295		-0.1345	1.8395	-1.1745	-2.053	0.48433	-3.099	-3.099			-1.3065		-0.1595	0.9425	0.0805	-1.1195	2.57
TCGA-AO-A12C-01	1.4255	-0.3485	1.774	-1.904	-3.339	-3.966	-3.20233	-4.2735	-2.916	-3.969	-3.0205	-3.2265	-3.34	-3.801	-3.5145	-2.51167	-2.8635	-4.2735	-2.9065	-5.1605	-2.7475	-2.8835	-3.8325	-3.381	-2.7265	-2.566			4.8465	7.978	7.565	1.4845		-0.993	0.3495	-0.792	-0.663	2.37367	-3.9495	-3.9495			-2.566		0.992	1.7885	0.8095	-3.0445	2.004
TCGA-AO-A12D-01	1.54775	0.10375	1.444	-0.78475	-1.32425	-1.93475	-2.30008	-1.90125	-0.25225	1.93825	-1.00925	-1.49475	-1.27025	-2.29675	-0.72125	0.18525	-2.03075	-1.90125	-1.76625	-4.13675	-2.08575	-1.11925	-2.66475	-2.33275	-1.03325	-1.08725			5.69625	6.74475	8.01075	-0.68775		-1.55625	0.11425	0.28025	-0.53225	3.33058	-1.40325	-1.40325			-1.08725		-0.63275	5.18625	2.34075	-0.95875	0.28875
TCGA-AO-A12F-01	1.455	-0.225	1.68	0.995	-0.1135	-1.079	-0.81517	-1.346	-1.398	-1.01	-1.293	-1.1945	-1.775	-2.067	-2.1315	0.20083	-1.0825	-1.346	-1.2435	-2.062	-0.118	-1.211	-1.6915	-0.7565	-1.431	-0.504			1.7675	6.9955	5.676	0.3565		0.2985	-0.236	1.705	-3.304	2.46517	-1.3365	-1.3365			-0.504		2.64	-0.751	-0.5385	-0.7435	1.173
TCGA-AR-A0TP-01	0.8355	0.058	0.7775	-0.2535	-0.4435	-1.702	-1.44883	-1.954	0.249	-1.027	-1.907	-0.429	-2.143	-2.089	-1.088	-0.1755	-1.881	-1.954	-0.48	-1.045	-0.871	-1.414	-1.8065	-1.451	-0.84	-0.7395			4.844	4.7305	4.592	-0.547		0.3345	0.6415	-2.7205	-3.631	0.6515	-2.5325	-2.5325			-0.7395		-0.884	-1.3415	2.7465	-0.7305	0.6885
TCGA-AR-A0TQ-01	1.914	-0.3435	2.2575	-1.0295	-1.498	-1.592	-1.10117	-1.134	-0.3115	-0.97	-1.4975	-1.1935	-1.197	-1.1425	0.538	0.00217	-0.373	-1.134	-0.291	-1.6345	-0.984	-0.9725	-1.652	-1.1265	-0.4135	-0.3275			4.5385	5.797	3.506	-0.254		2.084	-2.4525	-3.073	1.5695	1.4875	-1.921	-1.921			-0.3275		1.518	2.948	-1.076	-0.392	1.8975
TCGA-AR-A0TR-01	0.4215	0.0475	0.374	-2.3915	1.449	-3.068	-3.846	-4.6655	-3.132	-4.353	-2.84	-3.0665	-3.085	-3.179	-3.5745	-2.641	-3.006	-4.6655	-2.5295	-5.363	-3.4455	-3.3545	-3.938	-4.621	-3.135	-2.4245			-2.8705	3.724	-1.8515	-3.2815		0.413	-5.707	-2.843	-1.3885	0.02267	-3.872	-3.872			-2.4245		0.1255	2.505	0.153	-2.497	2.3505
TCGA-AR-A0TS-01	1.2875	0.3445	0.943	0.1095	-0.913	-1.094	-0.00783	-1.3315	0.33	-1.5515	-1.104	-1.1355	-1.2045	-2.575	-1.5225	1.04083	-1.5705	-1.3315	-1.7995	-1.2265	-0.957	-0.7085	-1.2485	-0.9915	-1.504	0.2955			0.318	5.498	3.7645	-0.447		1.7545	-2.399	1.073	-0.1755	1.6635	-0.1365	-0.1365			0.2955		-0.607	-0.7245	3.2575	0.048	0.933
TCGA-AR-A0TT-01	0.8755	-0.3215	1.197	-1.15	-1.181	-1.9565	-2.17017	-2.149	-1.364	-2.5515	-0.9755	-1.9215	-2.2985	-3.609	-1.6505	-0.82783	-2.41	-2.149	-1.022	-2.4525	-1.7225	-1.904	-2.58	-1.9025	-1.5665	-2.6765			2.9675	7.217	6.8345	0.885		-0.5855	-1.147	0.71	-1.584	1.67817	-2.146	-2.146			-2.6765		1.51	-0.9525	0.5495	-0.8325	1.1245
TCGA-AR-A0TU-01	0.7125	0.635	0.0775	1.014	0.255	-0.9135	0.1005	-0.147	-0.3	-0.3585	0.872	1.2735	0.8415	-0.77	-0.6335	0.07083	-0.1315	-0.147	-0.267	-1.692	0.655	0.301	-0.581	0.8085	-0.7265	-0.733			-0.8185	2.278	3.0905	-1.841		-1.221	0.041	-4.657	-0.969	0.47183	0.2495	0.2495			-0.733		0.4805	-0.6735	0.1145	2.1855	0.536
TCGA-AR-A0TV-01	1.904	0.1275	1.7765	-0.094	-1.4005	-0.761	-1.27883	-1.1475	-0.8085	-0.787	-1.268	-1.61	-2.116	-1.821	-0.4105	0.76617	-1.4795	-1.1475	-0.1565	-2.964	-0.6565	-1.648	-1.9805	-1.339	-1.524	0.7515			1.4095	4.394	4.2245	-1.518		1.918	-1.945	-2.2855	1.3315	1.13983	-2.4035	-2.4035			0.7515		1.508	-0.7975	1.273	-3.0125	0.9865
TCGA-AR-A0TW-01	2.74	-0.055	2.795	-1.6675	-2.8345	-2.855	-2.2585	-1.685	-1.908	-1.76	-2.6745	-2.6105	-2.232	-3.548	-1.439	-0.52917	-2.862	-1.685	-1.4775	-3.6245	-4.7935	-2.6745	-2.774	-2.031	-1.5785	-0.883			3.906	6.1025	5.294	-0.361		-0.2095	-1.03	-3.3515	2.253	2.6415	-3.0215	-3.0215			-0.883		-0.6455	3.4965	-0.359	-2.798	1.498
TCGA-AR-A0TX-01	2.1715	-0.0335	2.205	-1.7445	-2.64	-2.446	-1.16933	-2.247	-2.576	0.6835	-1.6885	-2.182	-1.6965	-2.962	0.691	-1.15367	-1.897	-2.247	-0.929	-3.9945	-1.6985	-1.0655	-3.0795	-2.2085	-1.648	0.051			4.1345	6.5255	6.4175	-0.3575		0.246	-1.0995	-2.4415	0.148	2.677	-3.069	-3.069			0.051		0.144	2.2255	0.749	-1.8115	1.838
TCGA-AR-A0TY-01	0.9435	-0.0635	1.007	-0.036	-0.9275	-1.784	-0.35333	-2.1305	0.0665	-1.641	-1.578	-0.528	-0.434	-0.2465	-0.385	0.78267	1.8905	-2.1305	0.431	-0.964	0.1595	-0.7875	-0.9735	-1.1245	0.082	-0.55			5.2915	4.489	2.6405	-0.7265		4.083	-1.509	-1.8435	-3.684	0.919	-0.868	-0.868			-0.55		2.2535	3.159	1.1585	-0.1455	3.373
TCGA-AR-A0TZ-01	2.296	0.5945	1.7015	-0.952	-1.889	-0.592	-2.34233	-2.053	-0.22	-0.0405	-1.1225	-1.341	-0.9455	-0.743	-1.459	-1.414	-0.4075	-2.053	0.3035	-2.385	-0.9375	-1.44	-1.865	-1.1435	-1.327	1.1475			5.275	6.2785	5.105	-0.3435		2.4865	-0.276	-2.6665	-0.494	2.72933	-2.195	-2.195			1.1475		0.3495	2.7465	-1.101	-0.926	2.841
TCGA-AR-A0U0-01	2.212	0.4675	1.7445	-0.506	-1.37	-1.315	-0.59033	-1.0085	-1.287	-1.0785	-1.1325	-0.527	-1.1715	-1.8335	-0.23	-0.739	-1.491	-1.0085	0.7455	-3.2045	-2.2315	-0.43	-0.7465	-1.0855	-0.5935	-0.4925			2.1455	4.7645	4.7885	-0.771		-3.2575	-0.249	-2.561	-0.6035	1.96167	-1.0855	-1.0855			-0.4925		0.6955	0.45	2.004	-1.6635	0.0375
TCGA-AR-A0U1-01	0.7915	-0.5705	1.362	-0.408	-2.396	-2.0025	-0.9305	-1.9025	-1.43	-2.117	-1.601	-1.0605	-2.073	-2.5285	-2.9405	-1.32117	-1.8775	-1.9025	-2.026	-0.365	-0.93	-1.8345	-2.6805	-2.0935	-1.827	-0.9485			-1.2495	5.94	4.83	-1.348		2.0435	-2.605	-0.1745	-3.3605	1.83117	-2.67	-2.67			-0.9485		3.271	4.41	1.528	0.7975	3.1895
TCGA-AR-A0U2-01	0.582	0.4515	0.1305	1.1005	-0.0545	0.5265	-0.85467	-0.685	1.1135	-0.78	-0.039	-0.3195	0.3085	-0.1545	0.214	0.668	-0.1465	-0.685	1.1415	-1.7225	-0.4555	-0.365	0.168	0.1835	-0.527	0.6075			1.66	3.752	3.4475	-0.914		2.5785	-3.6635	-2.5435	3.5445	1.00767	-0.3095	-0.3095			0.6075		-0.0355	5.0515	-0.047	-0.483	1.265
TCGA-AR-A0U3-01	0.1245	0.042	0.0825	-0.123	-1.7805	-1.8865	-1.16483	-2.24	-0.9005	-1.9715	-1.7495	-0.4845	-0.722	-1.9015	-0.3865	0.0155	-1.129	-2.24	-0.006	-1.77	-2.59	-1.186	-1.299	-1.4695	-1.319	-0.7105			4.6525	6.262	4.6915	-0.8065		0.1425	-2.034	-1.932	2.004	0.6855	-2.5105	-2.5105			-0.7105		0.2815	0.73	1.662	-0.0855	2.2485
TCGA-AR-A0U4-01	0.8525	0.101	0.7515	-0.3345	-1.1285	-2.1895	-0.4105	-1.949	-0.3855	-1.547	-1.154	-0.937	-2.3935	-2.0205	-2.194	-1.02017	-1.442	-1.949	-0.8245	-1.991	-1.3285	-1.927	-1.535	-0.6585	-0.753	-0.0025			2.789	5.278	5.5945	0.84		-0.334	-1.4695	0.5655	-2.6445	1.1755	-1.4395	-1.4395			-0.0025		0.719	-1.3445	1.045	-1.184	0.565
TCGA-BH-A0RX-01	0.309	-0.3495	0.6585	0.175	-0.8675	-1.2835	-0.355	-2.2465	-2.0985	-0.859	-1.6785	-1.077	-0.989	-2.4615	-1.7075	0.20133	-1.447	-2.2465	-1.069	-2.875	-0.386	-1.023	-2.3045	-0.604	-1.0935	-2.264			2.629	7.1445	5.431	0.4145		0.456	-0.183	0.0885	-1.787	1.85733	-2.23	-2.23			-2.264		0.2255	-0.585	3.5675	-0.308	1.4445
TCGA-BH-A0W3-01	1.1025	-0.157	1.2595	-0.781	-1.887	-1.5885	-1.88967	-2.4255	-0.9035	-1.764	-1.7585	-1.363	-2.4005	-1.92	-1.177	-0.729	-1.021	-2.4255	-0.7655	-1.269	-2.2325	-1.9205	-2.723	-1.894	-2.089	-0.5035			2.2285	6.4315	4.6695	-0.6935		3.646	-3.0015	-4.1135	3.128	0.95333	-3.179	-3.179			-0.5035		1.245	1.2225	1.847	-0.4095	2.653
TCGA-BH-A0W4-01	2.128	-0.087	2.215	-1.6295	-3.272	-2.2785	-2.3295	-3.036	-1.985	-2.592	-2.07	-2.529	-2.385	-2.623	-2.5415	-1.78483	-1.9805	-3.036	-1.969	-2.6295	-2.567	-2.1225	-3.095	-3.315	-3.0435	-1.358			3.511	7.468	6.102	0.7615		1.2785	-0.0495	-2.8805	0.207	2.62317	-3.6065	-3.6065			-1.358		-0.5455	-0.778	2.1	-1.148	1.6505
TCGA-BH-A0W5-01	1.228	-0.0875	1.3155	-2.239	-3.4435	-2.8445	-3.15867	-2.857	-2.3745	-2.793	-2.3945	-2.7235	-2.8885	-3.909	-2.391	-1.864	-2.8115	-2.857	-2.5095	-3.784	-2.7085	-2.392	-3.1015	-3.155	-2.691	-2.578			3.4215	7.384	7.634	-0.3965		-0.191	-1.2	0.0215	3.3945	3.48467	-4.2115	-4.2115			-2.578		1.413	3.633	2.8325	-2.0895	1.3725
TCGA-BH-A0W7-01	1.1655	-0.362	1.5275	-0.7205	-2.0485	-2.1435	-1.75117	-2.1225	-1.669	-2.2585	-2.167	-1.662	-1.5095	-1.312	-2.0725	-0.72683	-0.415	-2.1225	-2.196	-0.3245	-1.725	-1.3745	-2.6615	-2.6925	-2.5315	-0.494			4.7835	7.153	7.487	-0.15		1.6355	-0.5595	-1.933	2.081	4.2575	-2.72	-2.72			-0.494		1.75	0.798	2.7515	0.088	2.746
TCGA-BH-A0WA-01	0.18	0.1835	-0.0035	-0.8035	-1.7375	-1.4525	-0.32917	-1.437	-0.3195	-1.0225	-1.169	-1.235	-1.2875	-2.8005	-1.571	0.2415	-2.398	-1.437	-0.1505	-1.948	-1.2365	-0.6615	-2.159	-1.0525	-1.018	-0.973			5.8045	6.7505	7.1425	0.256		1.2785	-0.329	-0.914	-4.1585	2.06783	-1.108	-1.108			-0.973		0.205	-0.0575	4.3865	-0.4025	0.7875
TCGA-C8-A12N-01	0.555	0.098	0.457	-2.492	-4.295	-3.47	-3.419	-3.5435	-3.544	-3.665	-3.0465	-2.9515	-2.843	-4.597	-3.487	-1.704	-3.837	-3.5435	-3.9765	-3.9745	-4.1805	-2.493	-3.9825	-3.67	-3.566	-2.3645			6.5385	6.7595	8.0205	1.1945		-0.718	-0.0055	0.0435	-1.1975	4.566	-5.0475	-5.0475			-2.3645		0.469	-0.154	3.4005	-2.288	2.3565
TCGA-C8-A133-01	-0.0165	-1.006	0.9895	-2.629	-3.747	-3.7	-3.929	-3.4425	-2.7695	-2.98	-2.701	-2.7785	-4.3125	-3.459	-3.109	-2.14267	-2.912	-3.4425	-4.1555	-4.5665	-2.715	-2.869	-3.1125	-3.8295	-3.092	-2.9765			-0.6415	4.6185	2.0635	-2.184		-2.005	-0.2415	-5.025	2.9905	-0.35433	-4.3705	-4.3705			-2.9765		1.0575	2.599	-0.4145	-1.8265	2.857
TCGA-E2-A1BC-01	2.95825	-0.82975	3.788	-4.64075	-5.84675	-5.25775	-5.25225	-5.34625	-4.48275	-4.13525	-3.92525	-4.23475	-3.09625	-5.80025	-4.73775	-3.12358	-4.60775	-5.34625	-4.10875	-5.51725	-5.07375	-4.27275	-5.36825	-5.01675	-4.21775	-2.79225			4.49875	6.70775	7.71875	1.46725		1.19075	-1.18475	-1.21875	2.41475	3.89742	-5.66175	-5.66175			-2.79225		-0.33625	0.30775	3.45375	-2.54025	2.07925
TCGA-A8-A09G-01	0.838	-0.503	1.341	-0.685	-1.9915	-2.888	-1.88633	-2.8315	-1.1605	-2.0015	-1.923	-1.173	-1.693	-2.1905	-1.23	-0.469	-1.2525	-2.8315	-2.4015	-3.59	0.4	-1.5945	-1.929	-1.766	-1.485	-0.5245			0.643	6.6325	5.3505	-0.2635		-1.24	-0.578	-4.5905	2.311	1.66267	-2.706	-2.706			-0.5245		0.5365	4.083	1.0995	-0.301	2.379
TCGA-A2-A04N-01	1.61	0.0065	1.6035	-1.7125	-2.734	-2.678	-2.32517	-2.8305	-2.688	-2.709	-2.237	-2.5835	-2.316	-3.2285	-4.1725	0.0735	-2.5265	-2.8305	-1.7565	-2.502	-2.696	-2.154	-3.503	-2.954	-2.1965	-0.9285			5.266	6.655	7.864	-0.601		0.0465	0.769	-0.3145	2.557	4.17383	-3.5475	-3.5475			-0.9285		1.302	0.4625	2.999	-1.263	1.9745
TCGA-A2-A04P-01	3.9715	-0.5475	4.519	-0.801	-1.466	-1.703	-1.02717	-0.1805	-1.6535	-2.6215	-1.168	0.1695	-1.318	-4.0515	-3.975	-0.30683	-2.8815	-0.1805	-1.39	-3.0325	-0.4675	0.5995	-2.9285	-1.544	-1.017	-1.7075			-1.453	7.7595	4.291	-0.0665		-1.091	-0.06	-1.781	-2.305	2.1755	-1.526	-1.526			-1.7075		2.741	0.21	5.366	-0.1065	1.3695
TCGA-A2-A04Q-01	2.357	0.3325	2.0245	-0.006	-0.9685	-1.3275	-1.13583	-1.4275	-1.676	-2.293	-0.499	-1.359	-1.5035	-2.8035	-2.5105	-0.4635	-1.2315	-1.4275	0.581	-3.017	-0.913	-1.412	-2.513	-0.7185	-1.1625	-1.2545			3.936	7.3195	6.118	0.5955		0.3425	-1.941	-1.889	-2.647	3.24783	-1.634	-1.634			-1.2545		0.9075	-0.8805	2.1495	-1.1665	1.243
TCGA-A2-A04R-01	1.2525	0.071	1.1815	-0.228	-1.3815	-1.2565	-0.8225	-1.628	-0.5575	-1.32	-0.4245	-1.433	-1.7275	-1.2965	-2.336	-0.17683	-0.4955	-1.628	-0.305	-1.3705	-0.992	-1.4645	-1.724	-1.93	-1.1185	-0.497			2.777	8.0125	6.4575	1.4295		3.859	-0.279	-0.3815	0.8465	1.72717	-2.3905	-2.3905			-0.497		1.4915	3.42	-0.8335	0.6355	3.6905
TCGA-A2-A04T-01	0.62	0.082	0.538	0.5995	-0.2265	-1.1425	-0.60267	-1.0275	0.2415	-1.398	0.65	-0.7925	-1.3205	-1.6965	-0.907	1.01333	-1.0015	-1.0275	0.43	-0.239	-0.557	-0.704	-0.8225	-0.7715	-0.944	0.0305			0.316	5.739	5.077	-0.928		0.658	-2.3785	-1.346	-0.057	2.085	-1.326	-1.326			0.0305		0.547	-1.1165	2.658	-1.5735	1.7235
TCGA-A2-A04U-01	-0.0875	-0.392	0.3045	0.2295	-0.692	-0.829	-0.80633	-1.6145	-1.819	-1.5975	-0.332	-0.9475	-0.941	-2.4395	-2.2615	0.98233	-1.9885	-1.6145	-1.1295	-0.9885	1.3785	-0.9925	-2.0925	-0.3465	-1.6665	0.7855			3.871	6.542	6.654	-0.112		1.9455	-0.6585	-1.5485	0.874	2.20433	-0.8695	-0.8695			0.7855		0.4315	-0.598	1.3445	2.099	1.457
TCGA-A2-A04V-01	1.358	0.108	1.25	-1.188	-2.072	-0.6645	-2.127	-1.9895	-1.5435	-2.2435	-1.3875	-1.8605	-2.1425	-3.1955	-3.429	-0.307	-2.631	-1.9895	-0.599	-2.012	-1.161	-1.038	-2.63	-2.621	-2.909	-0.895			5.6375	8.008	8.1225	1.178		1.159	-1.0195	-0.3595	3.07	2.01833	-3.119	-3.119			-0.895		0.7095	-0.681	1.4575	-1.8235	2.3995
TCGA-A2-A04X-01	1.358	-0.4085	1.7665	-2.154	-3.1875	-2.6945	-1.94183	-0.9875	-1.073	-2.345	-1.2345	-0.555	-1.6605	-3.0085	-2.151	0.0605	-1.599	-0.9875	-0.6915	-2.0995	-1.2585	-1.0285	-2.459	-1.451	-1.087	-0.7865			2.07	6.733	6.537	-0.317		1.4745	-0.1275	-2.0345	2.3535	1.72517	-2.8675	-2.8675			-0.7865		0.4175	6.8725	1.432	0.0505	3.055
TCGA-A2-A04Y-01	2.5545	-0.5935	3.148	-0.424	-1.6635	-1.631	-2.09783	-1.655	-1.2145	-1.912	-1.355	-1.0825	-2.4015	-3.323	-3.0975	0.57017	-2.7105	-1.655	-0.6885	-2.3445	-1.2615	-1.371	-2.6295	-2.4585	-2.0835	-0.847			2.5795	6.6745	5.1935	-0.326		1.315	-2.642	-3.7365	2.256	1.26517	-2.205	-2.205			-0.847		2.7165	-0.7755	-0.4485	-2.462	2.7125
TCGA-A2-A0CL-01	1.978	-0.208	2.186	-1.2375	-1.88	-1.49	-0.69817	-2.238	-1.739	-1.779	-1.22	-1.5465	-1.2555	-2.1635	0.1205	-0.08183	-1.9675	-2.238	0.14	-4.3385	-0.7825	-1.717	-1.998	-1.12	-1.6535	-0.858			2.7545	5.361	2.8195	-0.1235		3.86	-2.8915	-1.864	2.7275	3.68883	-2.488	-2.488			-0.858		2.184	-0.739	2.2055	1.902	1.058
TCGA-A2-A0CP-01	1.886	-0.4165	2.3025	-3.5285	-5.0525	-4.3665	-4.40783	-4.047	-3.7205	-3.721	-3.506	-3.5705	-4.183	-5.0475	-4.9275	-1.89817	-4.19	-4.047	-3.0525	-4.3795	-3.603	-3.443	-4.8035	-4.416	-4.4005	-2.3875			4.695	8.6945	8.1895	0.3285		-0.769	0.072	0.053	4.882	3.94517	-5.04	-5.04			-2.3875		1.4385	-0.8585	4.0125	-1.934	2.022
TCGA-A2-A0CQ-01	2.628	-0.224	2.852	-0.363	-2.3735	-2.346	-2.77433	-2.645	-2.0175	-2.571	-2.273	-1.9425	-3.3245	-3.093	-3.6055	-0.39833	-2.4615	-2.645	-1.7085	-1.6645	-2.1955	-2.0135	-3.082	-3.6535	-3.544	-2.0595			-0.09	6.835	5.484	-0.581		2.239	-2.325	-3.86	0.633	1.334	-3.153	-3.153			-2.0595		0.2795	2.325	1.28	-1.773	2.3365
TCGA-A2-A0CS-01	0.9185	0.3235	0.595	-1.0435	-3.5125	-3.141	-3.40883	-4.207	-2.8355	-3.4275	-3.1885	-2.479	-2.5175	-3.674	-3.4785	-0.9545	-1.528	-4.207	-3.6585	-3.0015	-3.605	-2.4815	-4.2375	-3.402	-3.1115	-3.441			3.402	7.7175	8.486	-0.186		2.2165	-0.6025	-1.8705	-2.608	5.21917	-3.752	-3.752			-3.441		1.36	0.952	1.3415	-1.2315	3.27
TCGA-A2-A0CT-01	1.134	-0.049	1.183	-0.438	-1.893	-1.339	-2.5755	-1.951	-2.3595	-0.9985	-1.5735	-2.1765	-1.4325	-0.5245	-1.9705	-0.05917	0.231	-1.951	-0.5345	-3.576	-0.767	-2.221	-3.454	-2.2165	-2.619	0.194			2.502	6.591	3.356	-1.0335		1.7305	-0.163	-3.888	-0.337	1.86717	-2.7975	-2.7975			0.194		0.713	0.597	1.782	-1.2725	3.376
TCGA-A2-A0CU-01	2.563	0.068	2.495	-0.73	-2.8965	-0.9895	-2.1755	-2.1685	-1.399	-1.0565	-1.262	-3.2975	-2.5365	-2.869	-1.404	-0.59817	-2.2045	-2.1685	-1.38	-2.5235	-1.474	-2.1685	-2.6815	-3.4265	-2.4035	-0.7105			2.4945	6.9565	4.1035	-0.5015		2.345	-1.4125	-1.3915	-0.325	1.92817	-2.4635	-2.4635			-0.7105		1.366	1.972	-0.249	-2.093	2.3735
TCGA-A2-A0CV-01	3.133	-0.4425	3.5755	-1.9145	-5.0595	-5.2135	-5.55217	-4.642	-3.577	-4.8815	-3.5775	-3.661	-3.115	-5.5315	-4.65	-1.96983	-4.395	-4.642	-5.139	-3.124	-4.429	-4.066	-4.6425	-4.539	-4.08	-3.936			2.161	6.4075	2.9835	-0.8785		-2.436	-1.494	-3.496	2.3145	2.92817	-5.259	-5.259			-3.936		-0.7795	3.5275	2.7325	-2.3375	2.05
TCGA-A2-A0CW-01	1.0815	-0.531	1.6125	-0.1105	-1.302	-1.624	-0.38133	-1.604	-1.1995	-1.81	-0.846	-0.0875	0.006	-1.8965	-1.3485	0.89433	-0.7545	-1.604	0.1895	-2.1045	-0.8585	-1.334	-2.0815	-1.2275	-0.5325	-0.2715			2.464	6.0825	4.5305	-0.608		2.664	-2.3465	-4.524	0.6565	1.775	-1.8445	-1.8445			-0.2715		2.046	1.049	0.576	0.29	2.6555
TCGA-A2-A0CX-01	1.268	0.176	1.092	0.3545	-1.322	-0.9465	-1.55467	-1.6685	-2.0945	-1.257	-1.168	-0.9995	-1.9355	-2.5315	-0.619	1.04467	-0.2725	-1.6685	-1.9115	-2.853	-0.065	-1.551	-2.884	-1.6015	-0.589	-0.3185			5.1455	8.087	8.0675	0.5385		3.551	0.7085	0.6435	0.22	1.77633	-2.1215	-2.1215			-0.3185		1.1	1.3445	2.4885	-1.179	2.044
TCGA-A2-A0CY-01	0.7445	-0.8715	1.616	-1.089	-1.944	-2.872	-2.199	-3.267	-2.2605	-2.641	-1.5935	-1.4415	-2.246	-3.886	-2.66	-1.352	-3.6165	-3.267	-1.848	-3.35	-1.8815	-1.842	-3.0985	-1.636	-1.9895	-1.711			6.2325	7.2195	4.6205	2.528		-1.063	-0.0185	-2.368	0.987	0.66033	-2.052	-2.052			-1.711		3.0305	3.311	3.437	-0.315	1.5585
TCGA-A2-A0CZ-01	2.0635	-0.6395	2.703	-3.3385	-4.748	-4.187	-4.16667	-4.066	-3.255	-4.2295	-3.2645	-3.7715	-4.577	-4.9855	-4.599	-2.81133	-4.1885	-4.066	-3.0745	-4.3875	-3.3285	-3.5555	-4.23	-4.3815	-3.6245	-3.0115			7.3145	8.3815	8.0865	1.4805		-1.6	-1.314	-0.0635	2.8435	2.70633	-4.3465	-4.3465			-3.0115		-0.2025	-0.544	1.383	-2.45	1.24
TCGA-A2-A0D0-01	1.676	0.497	1.179	0.717	0.133	0.193	0.78783	-0.1805	-0.1345	0.1075	0.221	0.1545	-0.235	-0.97	-0.627	-0.28883	-0.076	-0.1805	0.0275	-1.58	-0.471	0.9575	-0.5005	0.3035	-0.2535	-1.653			5.2485	3.305	3.596	-0.446		-0.2915	-2.4215	-3.854	-1.92	0.98383	-0.566	-0.566			-1.653		0.055	-1.7575	2.7945	0.7365	-0.776
TCGA-A2-A0D1-01	0.318	-0.5875	0.9055	-0.9935	-1.7975	-1.8025	-0.82783	-1.0365	-1.033	0.6365	-1.093	-0.801	-2.579	-2.864	-1.491	1.48617	-1.144	-1.0365	-0.8575	-2.209	-0.9105	-1.7155	-2.429	-1.296	-0.6195	0.341			1.7985	7.5535	6.434	0.123		2.877	0.9145	-1.571	6.028	2.42017	-2.1375	-2.1375			0.341		2.16	0.1655	2.776	-0.069	2.7305
TCGA-A2-A0D2-01	1.396	0.0945	1.3015	0.7835	-0.524	-0.9995	-0.21733	-0.5355	0.4655	-0.9305	-0.57	-1.104	-0.453	-0.8495	-1.9975	0.264	-0.474	-0.5355	0.1395	-0.497	0.603	-0.76	-1.2065	-0.022	-0.114	0.2115			3.4915	6.188	4.8975	0.474		-2.354	-1.185	-1.4555	-3.403	2.77367	-0.4695	-0.4695			0.2115		-1.8795	-1.0775	3.4675	1.7675	1.149
TCGA-A2-A0D3-01	1.906	-0.161	2.067	-1.7545	-4.205	-5.292	-4.9655	-4.681	-4.5345	-4.223	-3.3225	-3.615	-2.764	-5.0295	-4.193	-2.61017	-3.928	-4.681	-5.0695	-5.2135	-4.96	-4.083	-4.2755	-4.4115	-3.553	-3.523			1.4715	5.735	4.1825	-1.102		-1.755	-2.2965	-2.805	2.421	2.69083	-5.271	-5.271			-3.523		-0.145	2.504	2.568	-2.613	2.003
TCGA-A2-A0D4-01	1.066	0.0085	1.0575	0.6035	-0.056	0.1815	-0.91	-0.735	-0.242	-0.5975	0.1685	-2.0115	-1.2355	-0.862	-1.3995	1.54367	-1.0955	-0.735	0.3045	-1.5715	-0.13	-0.82	-2.2205	-1.82	-1.4755	0.847			1.311	3.6785	0.671	-1.9175		3.2245	-1.8745	-2.6535	2.4925	1.116	-2.3925	-2.3925			0.847		1.858	3.9875	0.3855	-0.779	2.8195
TCGA-A2-A0EM-01	0.2	-0.1505	0.3505	-1.1425	-2.7345	-3.332	-3.002	-3.109	-1.9765	-2.3505	-2.968	-2.598	-3.167	-3.3735	-2.9475	-1.61567	-1.4855	-3.109	-2.5115	-3.337	-3.0125	-3.0705	-3.16	-3.3085	-2.86	-2.5015			3.734	7.5875	7.877	0.822		1.4775	-0.045	-0.7735	-0.544	3.11133	-3.426	-3.426			-2.5015		0.437	0.979	0.0175	-1.419	2.0145
TCGA-A2-A0EO-01	2.7295	-0.5925	3.322	-1.485	-3.84	-2.769	-3.41733	-3.314	-2.859	-3.59	-2.738	-2.8825	-3.28	-3.3205	-3.915	-1.00667	-2.652	-3.314	-2.776	-3.106	-2.8455	-3.05	-3.811	-3.8335	-3.61	-1.8465			2.3305	8.597	7.6115	1.1985		0.3185	-1.2015	-1.6005	3.4065	3.71733	-3.082	-3.082			-1.8465		0.6915	-1.032	3.3235	-1.467	2.651
TCGA-A2-A0EQ-01	1.807	-0.2385	2.0455	-0.5465	-1.877	-1.082	-0.506	-1.2855	-1.6805	-1.2825	-1.2515	-0.23	-1.4505	-1.718	-1.524	1.584	-1.0195	-1.2855	-0.835	-0.8195	-1.6035	-1.7465	-2.1945	-1.1965	-1.362	-0.684			1.103	5.407	2.17	-0.5975		0.9995	-2.355	-2.2375	3.3845	1.99833	-2.2005	-2.2005			-0.684		2.895	-0.333	-0.3915	-0.0125	1.9355
TCGA-A2-A0ER-01	2.286	-0.2605	2.5465	-0.31	-1.8685	-1.1845	-1.43433	-2.3015	-0.742	-2.2395	-1.3405	-1.727	-1.126	-2.01	-1.8595	-1.16533	-1.9055	-2.3015	-0.195	-1.6445	-1.584	-1.9705	-2.5185	-2.496	-1.4585	-0.1135			1.808	6.1895	4.1525	-1.0545		2.523	-2.9435	-3.7475	3.2805	0.99667	-3.0765	-3.0765			-0.1135		2.243	3.0565	-0.044	-0.8475	2.4105
TCGA-A2-A0ET-01	1.741	-0.067	1.808	-0.9575	-2.131	-2.0735	-2.64833	-2.119	-1.713	-3.01	-1.8015	-2.5275	-3.022	-2.366	-3.5475	-1.536	-2.102	-2.119	-2.1155	-2.0775	-3.0985	-2.662	-3.3335	-3.3145	-2.726	-1.3765			-1.177	3.751	2.596	-1.9345		2.8875	-0.3755	-3.509	0.631	-0.279	-3.0875	-3.0875			-1.3765		0.274	3.2675	-1.093	-1.174	2.6575
TCGA-A2-A0EU-01	1.9325	0.356	1.5765	-1.283	-2.6985	-1.9085	-2.14817	-2.914	-1.683	-1.321	-1.749	-2.768	-1.226	-4.1465	-3.463	-0.5005	-3.269	-2.914	-1.1505	-2.5625	-1.5835	-2.0535	-3.028	-2.665	-1.1275	-0.727			5.5395	7.4875	6.9845	-0.3715		0.944	-0.6605	-2.155	2.047	3.88617	-4.2875	-4.2875			-0.727		1.861	3.181	1.0645	-2.288	2.6365
TCGA-A2-A0EV-01	1.4165	-0.224	1.6405	-0.577	-2.571	-1.7085	-2.07717	-2.9305	-1.68	-1.7765	-2.199	-2.2835	-1.9875	-3.0355	-2.4455	-0.34317	-1.75	-2.9305	-2.067	-2.446	-2.238	-1.9895	-1.8215	-1.728	-1.4655	-1.7705			4.2735	8.4175	7.8915	1.017		1.434	-2.1685	-1.149	-0.0695	3.44183	-3.0465	-3.0465			-1.7705		1.561	2.8885	2.4235	-1.1655	2.6635
TCGA-A2-A0EY-01	1.6525	-0.2425	1.895	-0.044	-2.0415	-2.637	-1.8865	-2.427	-2.037	-2.6775	-2.0415	-2.651	-1.4955	-3.058	-1.1385	-0.75183	-1.2325	-2.427	-1.6365	-2.047	-1.9015	-2.3985	-3.721	-2.3385	-2.113	-2.7215			5.9675	7.464	5.7535	0.8605		-0.255	-2.156	0.3615	3.2935	-0.00383	-2.3155	-2.3155			-2.7215		1.453	2.463	-1.0335	-1.484	2.46
TCGA-A2-A0ST-01	2.232	0.01	2.222	-0.6175	-2.1285	-1.1265	-1.49167	-2.3425	-1.794	-1.692	-1.412	-1.51	-1.948	-2.869	-1.3945	-1.516	-1.6445	-2.3425	-1.3555	-2.907	-0.711	-1.664	-2.2195	-1.1825	-1.186	-1.0555			1.034	3.5815	2.0605	-1.19		-1.965	-3.105	-3.153	-1.7115	1.73667	-2.3845	-2.3845			-1.0555		0.52	1.28	1.077	-1.622	0.7195
TCGA-A2-A0SU-01	1.726	-0.2165	1.9425	-1.3785	-2.973	-2.001	-2.66333	-2.975	-1.781	-1.791	-2.626	-2.3255	-2.9495	-2.7335	-2.4175	-1.37533	-1.464	-2.975	-1.355	-3.3285	-2.0225	-1.88	-3.4905	-2.876	-2.709	-1.4335			3.438	6.8385	6.2065	-0.1845		-1.1335	-0.7275	-2.249	4.358	1.86733	-3.621	-3.621			-1.4335		1.084	5.725	-0.745	-2.7095	2.375
TCGA-A2-A0SV-01	2.597	-0.0075	2.6045	0.6195	-1.4785	-1.1945	-1.28567	-1.452	-0.666	-1.101	-0.737	-2.3045	-1.015	-1.8655	-0.842	0.34667	-1.1175	-1.452	-0.44	-0.828	-1.319	-0.931	-1.623	-1.575	-0.8735	-0.552			1.1955	7.51	8.0055	1.0205		1.272	-1.3325	0.7725	3.0645	3.30167	-1.394	-1.394			-0.552		-0.314	1.693	4.014	-1.424	1.658
TCGA-A2-A0T0-01	0.9915	-0.097	1.0885	-0.4455	-1.2235	-1.6435	-1.6465	-1.423	-0.722	-1.5655	-0.7725	-0.574	-0.5415	-1.743	-1.0515	-0.10283	-1.3195	-1.423	-0.121	-2.291	-0.934	-0.846	-0.8945	0.153	-1.025	-1.914			0.38	7.6335	8.0795	1.131		-1.2435	0.6325	0.3985	-2.8515	2.3785	-1.8565	-1.8565			-1.914		-0.2555	3.6625	3.9425	-1.357	0.9665
TCGA-A2-A0T1-01	0.832	0.012	0.82	-1.0935	-1.2865	-2.6115	-1.3605	-2.3435	-2.0495	-1.876	-1.794	-1.604	-1.7665	-3.8355	-2.154	1.1035	-2.2655	-2.3435	-0.7605	-3.3935	-1.427	-1.296	-2.391	-1.816	-1.19	-1.3795			6.3155	7.3155	6.968	1.031		-0.647	-0.0085	-0.259	-0.063	2.05617	-3.245	-3.245			-1.3795		0.1835	5.033	0.0875	-0.074	0.7355
TCGA-A2-A0T3-01	2.388	1.1355	1.2525	0.2085	-0.814	-0.1485	-0.78033	-0.261	-1.198	-0.7415	0.1455	-0.543	-0.007	-1.445	-2.27	0.774	-1.229	-0.261	-1.224	-2.0925	-2.65	-0.8055	-1.3855	-0.5185	-0.0835	1.26			5.0935	5.247	3.9155	-0.277		2.5795	-1.1425	-2.7265	-1.34	2.991	-2.2605	-2.2605			1.26		-1.0505	2.259	1.502	-0.4925	1.0555
TCGA-A2-A0T5-01	1.4295	-0.24	1.6695	-0.419	-1.885	-2.5865	-3.259	-2.6305	-2.216	-1.1455	-2.179	-1.8805	-2.227	-2.292	-2.7655	-1.14533	-0.8145	-2.6305	-2.076	-3.5405	-2.601	-2.3475	-2.909	-2.317	-2.639	-1.5625			4.301	7.072	5.5395	0.6635		-1.29	-0.883	-1.7995	2.1985	2.27533	-2.4055	-2.4055			-1.5625		-0.56	4.016	2.627	-1.948	1.3035
TCGA-A2-A0T7-01	2.535	0.1635	2.3715	-0.7865	-1.3995	-1.9125	-2.266	-2.722	-2.257	-2.082	-1.7845	-1.864	-1.615	-2.51	-2.4055	-0.28367	-1.667	-2.722	-2.1465	-2.248	-1.9985	-1.629	-3.2275	-2.5675	-2.4005	-1.256			4.351	7.542	7.9015	0.0235		1.5415	-1.421	-0.3565	1.05	3.17033	-2.903	-2.903			-1.256		-0.2035	2.722	2.902	-0.625	1.9915
TCGA-A2-A0YC-01	1.97525	0.40425	1.571	-0.73775	-2.63975	-1.31625	-2.52608	-2.39925	-1.76425	-1.99325	-1.88025	-1.66725	-2.24375	-2.22375	-1.27475	-1.44075	-1.42225	-2.39925	-1.43575	-3.34875	-2.55375	-1.77625	-2.33025	-3.16325	-2.57525	-1.39025			2.37725	7.09375	6.46025	-0.20475		1.32725	0.16325	-0.49375	-0.19875	2.22925	-3.48225	-3.48225			-1.39025		0.78675	1.20825	1.58375	-1.90875	1.79575
TCGA-A2-A0YE-01	-0.0235	0.288	-0.3115	-0.2485	-1.3715	-0.5485	-0.15583	-1.7755	0.1105	-1.468	-0.797	-1.4585	-0.5395	-1.801	-1.6115	-0.35517	-1.1385	-1.7755	0.3765	-1.826	-1.297	-0.493	-2.342	-0.9865	-1.1835	-1.0255			3.19	7.0595	6.255	0.204		1.728	-1.143	-0.345	-0.933	1.3085	-1.464	-1.464			-1.0255		1.1565	-1.1325	1.5845	-0.91	1.3425
TCGA-A2-A0YF-01	1.067	-0.2165	1.2835	-0.817	-2.521	-1.5765	-2.135	-2.235	-1.127	-2.1105	-1.601	-1.807	-2.7165	-1.9425	-1.832	-0.943	-0.918	-2.235	-1.23	-2.1485	-2.2325	-1.9295	-2.487	-2.815	-2.1445	-1.5755			4.3545	6.5315	4.1245	-0.907		2.4475	-0.5335	-2.721	0.0085	0.90067	-2.879	-2.879			-1.5755		0.299	5.8945	0.659	-1.5	2.297
TCGA-A2-A0YG-01	0.879	-0.4295	1.3085	0.0655	0.295	-1.8655	-1.23983	-1.5465	-0.5995	1.851	-0.466	-1.478	-1.6695	-1.2375	-0.7725	0.26883	-0.624	-1.5465	-0.529	-2.325	-1.112	-0.6235	-1.846	-0.561	-0.47	0.4735			5.3815	6.6515	5.892	0.0775		-1.504	-0.538	-1.49	3.4445	1.54383	-1.986	-1.986			0.4735		0.969	4.1415	0.446	-0.7445	2.776
TCGA-A2-A0YH-01	0.9135	0.133	0.7805	0.0615	-1.212	-1.4295	-1.23483	-2.0415	-1.3585	-0.898	-1.4525	-1.06	-1.015	-2.33	-2.0305	0.49917	-2.0145	-2.0415	-1.84	-2.6735	-1.54	-1.6975	-1.7015	-1.4835	-1.4055	-0.8475			4.8665	6.801	7.1445	0.013		0.9335	-0.608	-1.257	3.019	3.9735	-2.1215	-2.1215			-0.8475		1.4285	3.1995	1.435	-1.0285	1.6235
TCGA-A2-A0YJ-01	1.8235	0.283	1.5405	-0.292	-1.145	-1.7015	-0.30283	-1.857	-1.0515	-1.946	-1.294	-1.599	-1.9365	-1.5925	-1.051	-0.9355	-2.2045	-1.857	-0.065	-2.1355	-1.558	-1.312	-1.369	-0.8145	-1.3295	-0.868			0.346	6.751	5.115	-0.3065		0.718	-1.105	-1.297	-3.972	0.8055	-1.252	-1.252			-0.868		-0.6085	-0.9365	3.04	-1.213	0.6165
TCGA-A2-A0YM-01	1.2725	0.1305	1.142	0.085	-0.654	-0.9595	0.02717	-0.7115	-0.827	-0.8975	-0.164	-0.457	-0.722	-1.436	-1.241	1.15817	-1.046	-0.7115	0.309	-0.0925	-1.205	-0.6275	-0.8995	-0.6695	-1.3715	-0.5835			3.5505	6.1725	5.798	0.0365		2.931	-1.009	-1.5735	1.166	0.50883	0.2215	0.2215			-0.5835		0.4235	-0.948	0.491	0.5305	1.0985
TCGA-A2-A0YT-01	1.7815	-0.248	2.0295	-0.396	-1.381	-1.6385	-1.08767	-1.163	-0.7905	-2.1315	-0.7755	-1.817	-2.368	-2.048	-1.4125	-0.152	-1.8645	-1.163	-1.19	-1.696	-1.2505	-1.8435	-2.1175	-1.9085	-0.4975	0.3395			0.8905	5.6515	0.962	-0.3085		0.3645	-2.6235	-3.9985	2.626	1.188	-1.7635	-1.7635			0.3395		1	1.718	1.3235	-1.2775	3.083
TCGA-A8-A06N-01	0.16875	-0.13325	0.302	-2.05975	-3.27775	-2.23625	-2.76408	-2.60375	-2.33825	-1.93075	-1.93925	-3.74675	-2.71775	-3.86575	-2.98875	-0.38942	-3.56275	-2.60375	-2.55775	-2.76325	-2.62075	-2.96525	-3.02025	-3.31925	-3.22775	-0.27825			-0.13875	0.79825	-0.50025	-2.72975		0.37425	-0.44075	-3.77525	-4.14575	-1.01375	-3.51025	-3.51025			-0.27825		-0.57375	1.91075	-0.47825	-2.54175	3.24225
TCGA-A8-A06O-01	1.609	-0.0865	1.6955	-0.054	-1.197	-1.6215	-2.121	-1.428	-0.9205	-0.902	-1.0485	-1.984	-2.951	-2.156	-1.929	0.549	-1.157	-1.428	-2.801	-3.1615	-1.4615	-1.4345	-1.8175	-1.211	-1.8705	0.3615			2.096	7.5735	5.165	-0.444		1.23	-2.116	-3.393	2.671	1.70933	-1.8225	-1.8225			0.3615		-0.337	3.1075	2.0115	-1.92	2.1125
TCGA-A8-A06P-01	0.649	-0.573	1.222	-2.2615	-4.246	-3.4145	-3.11233	-3.8985	-2.878	-1.4745	-3.099	-3.1075	-3.1685	-4.092	-3.576	-2.113	-3.5065	-3.8985	-2.619	-3.9745	-2.8115	-3.211	-3.8135	-3.426	-3.098	-1.7275			4.571	7.606	7.8275	1.136		0.507	-1.419	0.742	2.825	3.175	-4.357	-4.357			-1.7275		1.044	0.981	1.479	-1.4115	2.142
TCGA-A8-A06Q-01	0.1495	-0.225	0.3745	-0.6585	-1.3005	-2.6205	-1.47867	-1.2165	-0.9675	-1.813	-2.425	-2.2735	-1.6985	-1.8705	-1.5935	-1.39933	-0.8645	-1.2165	-1.54	-0.632	-1.183	-1.572	-1.82	-1.7245	-1.478	-0.726			-0.044	4.427	0.957	-1.965		1.4765	-3.8175	-3.3485	1.1065	0.47	-2.324	-2.324			-0.726		0.4475	-0.0705	1.804	-1.2715	2.337
TCGA-A8-A06R-01	0.209	-0.236	0.445	-0.8985	-2.7175	-1.7735	-1.67283	-1.5725	-1.5815	-2.3195	-1.732	-1.6125	-2.464	-4.1265	-2.4345	-1.1395	-3.726	-1.5725	-1.6245	-3.039	-2.2475	-1.1495	-3.3055	-2.498	-2.211	-2.958			2.3765	8.3505	7.759	1.8245		-0.294	1.6105	0.101	1.7535	3.23417	-2.7445	-2.7445			-2.958		1.369	-0.338	0.712	-1.1715	1.7215
TCGA-A8-A06T-01	1.1675	-0.4885	1.656	-2.0705	-2.8795	-3.0815	-3.223	-3.0205	-1.55	-1.8555	-2.0385	-2.4665	-3.203	-3.7695	-3.124	-0.32733	-3.0155	-3.0205	-3.5	-3.438	-3.2295	-2.6205	-3.5555	-2.5335	-2.6715	-1.0875			2.5505	7.234	6.412	-0.7625		-0.733	-0.5155	-3.643	2.668	2.58033	-3.241	-3.241			-1.0875		0.0375	1.8575	1.466	-3.4205	2.471
TCGA-A8-A06U-01	0.96	0.327	0.633	-0.649	-2.0975	-1.509	-1.95967	-2.054	-2.1255	-1.8305	-1.229	-1.1595	-3.1945	-2.3865	-1.148	-0.03933	-1.112	-2.054	-0.5635	-3.0815	-1.4075	-1.708	-3.3505	-1.5495	-1.305	-0.7745			2.2475	6.7025	5.4395	-0.38		1.9395	-1.753	-1.843	-3.3525	2.27233	-2.9895	-2.9895			-0.7745		1.769	4.585	1.603	-2.3805	2.7535
TCGA-A8-A06X-01	1.2535	0.8495	0.404	-0.189	-1.3355	-1.5225	-1.08683	-2.0475	0.3675	-1.4285	-0.6755	0.012	-1.9135	-2.5055	0.369	-1.17617	-2.5175	-2.0475	-1.813	-3.201	-1.496	-0.8355	-1.5485	-0.5535	-0.7045	-1.326			5.624	7.0105	5.8975	-0.6		-3.9475	-1.7975	-2.5675	-1.624	2.91917	-2.4065	-2.4065			-1.326		1.1455	0.355	1.845	-1.1775	2.3195
TCGA-A8-A06Y-01	0.40025	0.16875	0.2315	-1.58675	-2.90525	-3.49925	-3.65108	-3.75825	-3.53025	-2.21025	-2.69375	-2.35575	-3.62975	-3.24375	-3.34475	-1.26442	-1.93525	-3.75825	-4.61625	-4.31975	-3.78775	-3.05025	-4.32275	-3.18075	-1.82925	-1.88525			2.66875	6.33775	4.12825	-1.04425		1.04575	1.06525	-3.15075	-1.48725	0.53925	-3.83725	-3.83725			-1.88525		1.11725	3.93475	1.72975	-2.23925	2.92175
TCGA-A8-A06Z-01	0.472	-0.5615	1.0335	-0.3535	-2.108	-1.4725	-2.33267	-1.5715	-2.1545	-1.646	-1.617	-1.7225	-2.48	-3.1365	-1.8315	0.12267	-2.511	-1.5715	-1.227	-2.0775	-1.047	-1.64	-2.8775	-2.521	-2.0225	-1.186			2.6935	5.184	3.431	-1.262		1.9815	0.6335	-4.7385	1.097	0.88933	-2.324	-2.324			-1.186		0.7015	1.7555	1.297	-1.5005	3.2305
TCGA-A8-A075-01	0.733	-0.3565	1.0895	-0.026	-1.999	-2.186	-1.72467	-0.8905	-0.97	-2.256	-1.405	-0.6485	-1.4265	-2.0535	-1.8245	1.15167	-1.029	-0.8905	0.0365	-1.9345	-1.5035	-1.7225	-1.21	-1.159	-1.202	-0.9035			4.142	7.696	7.2375	1.2275		1.362	-0.646	0.5315	2.489	1.77767	-1.5465	-1.5465			-0.9035		0.5175	3.961	1.781	0.4695	1.4845
TCGA-A8-A076-01	0.329	-0.2035	0.5325	-0.7725	-1.715	1.119	-1.44967	-1.619	-1.8975	0.431	-1.3535	-1.0285	-1.4715	-2.509	-1.0755	0.01433	-1.674	-1.619	-1.227	-1.913	-0.8215	-1.447	-2.41	-2.323	-1.325	0.0125			5.032	7.41	7.5795	1.1185		0.2215	-1.903	1.038	2.433	2.31967	-2.407	-2.407			0.0125		1.0245	2.8185	1.2235	-0.4025	2.031
TCGA-A8-A079-01	0.2715	0.0255	0.246	0.666	-1.182	-0.811	-0.78	-0.9685	0.2875	-0.898	0.2665	-0.9535	-0.3955	-1.466	-1.6805	0.009	-0.8715	-0.9685	-0.77	-1.5665	-0.6525	-1.102	-1.2305	-0.881	-1.6715	0.164			1.022	6.819	5.237	-0.4205		3.026	-2.729	-1.3075	2.535	1.221	-2.407	-2.407			0.164		0.7385	-1.2605	1.7025	-0.414	2.1545
TCGA-A8-A07B-01	0.7915	0.0245	0.767	-0.502	-2.292	-1.498	-1.53617	-2.5785	-1.464	-1.388	-1.274	-2.022	-1.8025	-1.9115	-2.6485	0.1315	-1.376	-2.5785	-0.837	-3.709	-1.9345	-1.308	-2.359	-0.807	-1.987	-1.103			5.651	7.974	7.704	0.623		-2.348	0.781	-0.5025	-1.3545	2.55517	-3.011	-3.011			-1.103		1.342	4.085	0.0445	1.3365	1.803
TCGA-A8-A07C-01	0.95325	0.39675	0.5565	0.75125	0.08425	0.04775	0.52142	-0.30025	-0.63275	-0.38675	-0.54825	-0.97875	0.40825	-1.66375	-1.81625	1.02075	-0.82675	-0.30025	0.16325	-0.84975	-0.31175	-0.76425	-1.49175	-0.10575	-1.43925	-0.97425			0.26375	6.40325	5.76475	-0.15975		0.95675	-1.76625	-0.36625	-3.72375	0.77675	-0.92375	-0.92375			-0.97425		0.12175	-0.93525	0.32075	0.35775	0.82175
TCGA-A8-A07E-01	1.2625	0.1715	1.091	-0.486	-2.0345	-1.9605	-1.55233	-1.7075	-0.894	-2.817	-1.8565	-1.402	-1.942	-2.549	-0.9305	-0.66533	-1.5785	-1.7075	-0.5015	-1.757	-1.6005	-1.118	-1.9725	-0.136	-2.06	-1.263			3.302	6.794	6.45	0.152		2.14	-0.2705	-2.186	2.962	3.77633	-3.1495	-3.1495			-1.263		0.2445	2.65	3.0375	-0.4135	1.667
TCGA-A8-A07F-01	1.2405	0.055	1.1855	-0.886	-2.546	-2.6395	-1.71817	-2.418	-2.105	-2.308	-1.7795	-2.0505	-1.5475	-1.892	-2.974	-1.8005	-1.252	-2.418	-2.9095	-3.1595	-2.612	-1.877	-3.3095	-2.6215	-1.978	-1.6095			2.818	7.6425	5.522	-0.162		-1.58	-0.2925	-2.632	3.4375	2.55917	-2.5825	-2.5825			-1.6095		0.1845	0.9525	2.73	-0.8735	2.316
TCGA-A8-A07G-01	0.3305	-0.272	0.6025	-1.9165	-2.673	-3.348	-3.227	-3.272	-2.863	-3.0325	-2.6445	-2.993	-3.232	-4.3085	-3.0975	-1.94667	-2.9045	-3.272	-2.3625	-4.141	-2.9945	-2.681	-3.5905	-2.961	-1.958	-2.104			6.4215	8.247	8.6	1.674		-0.057	-0.4755	1.22	-1.278	3.479	-3.856	-3.856			-2.104		0.7475	1.4235	3.726	-1.5395	2.413
TCGA-A8-A07I-01	1.365	0.122	1.243	0.086	-1.597	-2.246	-1.4295	-1.2895	-0.869	-2.454	-1.032	-1.5405	-1.755	-3.2565	-1.023	0.3805	-2.038	-1.2895	-0.3535	-2.451	-1.837	-0.8515	-2.1655	-2.314	-0.8225	-0.7235			5.7315	7.4425	7.441	1.0185		0.114	-1.681	0.123	1.3845	4.1845	-1.8185	-1.8185			-0.7235		1.6695	0.924	2.1765	-1.221	2.667
TCGA-A8-A07J-01	1.234	0.143	1.091	-3.17	-4.5605	-3.7345	-4.59283	-4.202	-3.2005	-3.8175	-3.264	-2.8395	-3.6075	-5.0385	-3.021	-3.19883	-3.0395	-4.202	-4.576	-5.1815	-3.3545	-3.031	-4.1895	-4.074	-2.7015	-2.8965			4.5145	8.2825	8.1335	0.927		-1.877	-1.1175	-1.564	-2.533	3.24817	-4.415	-4.415			-2.8965		-1.714	-1.3635	2.295	-4.1955	2.259
TCGA-A8-A07L-01	-0.0395	-0.442	0.4025	-0.773	0.213	-1.0645	-0.02833	-0.358	0.1365	-1.0905	-0.8535	-0.582	-0.091	-1.5955	-0.9855	0.98567	-0.9435	-0.358	-0.2535	-1.104	-1.145	-0.3755	-2.496	-1.6885	-1.381	-0.2605			4.5025	7.279	6.973	0.471		2.751	-0.5335	-1.387	1.583	2.34167	-1.074	-1.074			-0.2605		1.084	-0.891	1.816	-0.1905	2.0605
TCGA-A8-A07O-01	-0.558	-0.04	-0.518	0.804	0.2685	-0.761	-0.42167	-1.41	-0.6895	-0.126	-0.477	-0.796	-1.017	-0.899	-1.162	0.272	-0.6985	-1.41	-1.33	-1.5675	0.24	-0.725	-0.376	-0.738	-0.182	-0.1405			2.0455	5.6655	5.3915	-0.188		-0.806	-0.33	-2.663	-2.0535	1.79933	0.8935	0.8935			-0.1405		-0.014	-0.828	4.243	0.0135	0.4675
TCGA-A8-A07P-01	0.9675	-0.241	1.2085	-1.215	-2.4275	-1.795	-2.41467	-2.8645	-2.2225	-1.0405	-3.0475	-1.957	-2.116	-2.88	-1.764	-1.18767	-1.8055	-2.8645	-3.23	-4.0305	-1.2525	-2.259	-3.192	-2.6915	-2.0235	-0.8255			2.9685	6.882	6.113	-0.419		-2.711	-1.0605	-2.465	2.7155	0.90067	-3.5025	-3.5025			-0.8255		0.6945	3.0185	-0.468	-1.152	2.4735
TCGA-A8-A07R-01	0.6735	0.2795	0.394	0.3775	-0.6835	-0.6785	-0.70383	-0.5135	0.967	-0.7015	-2.1895	-0.639	-1.9205	-2.732	-1.931	1.40817	-1.2585	-0.5135	-0.083	0.1325	-0.0005	-0.292	-1.5865	0.8215	-1.206	-2.6295			-0.583	5.808	4.858	-0.045		1.499	-1.1355	0.101	-0.605	1.52117	-1.1575	-1.1575			-2.6295		0.1535	-0.4765	2.6125	0.8	0.686
TCGA-A8-A07U-01	1.834	-0.1745	2.0085	-0.274	0.258	-1.54	0.16617	-1.147	-0.4115	-1.8395	-1.3805	-1.109	-1.394	-1.9965	-1.628	-2.24683	-1.57	-1.147	-0.222	-3.9655	-0.679	-0.812	-2.153	0.235	-1.071	-1.3265			2.0065	5.5225	4.8645	0.32		-0.8265	-0.185	-2.7615	2.31	2.12983	-0.862	-0.862			-1.3265		0.071	-0.423	1.9325	-0.275	-0.331
TCGA-A8-A07W-01	0.327	-0.19	0.517	0.308	-1.637	-0.4175	-1.08867	-1.5305	-0.5315	-0.625	-0.9225	-1.7435	-2.19	-1.8745	-1.181	1.00867	-1.185	-1.5305	-2.0295	-2.45	-1.223	-1.0925	-1.7035	-1.735	-0.469	-0.866			6.589	8.2025	7.789	1.92		2.1875	-0.765	0.7195	1.6715	1.476	-0.9305	-0.9305			-0.866		1.457	3.0785	1.5095	-0.6765	1.971
TCGA-A8-A07Z-01	0.434	0.129	0.305	-0.2955	-1.96	-1.8475	-2.56717	-2.68	-1.1945	-1.784	-1.825	-1.9155	-2.2855	-2.043	-2.257	-1.55483	-1.5105	-2.68	-1.337	-1.471	-1.9385	-1.7505	-3.0035	-2.509	-1.8405	-0.803			1.362	4.1915	3.1955	-0.4825		2.6285	-1.17	-4.1415	-1.8425	0.93417	-2.513	-2.513			-0.803		1.048	1.871	0.408	-1.1245	2.675
TCGA-A8-A081-01	-0.32	-0.269	-0.051	-0.0375	-1.6215	-0.6925	-0.93333	-2.0825	-1.376	-0.688	-1.204	-2.178	-1.567	-2.996	-1.2605	-0.19067	-1.8475	-2.0825	-0.448	-0.4945	-2.0545	-2.305	-2.72	-1.705	-1.9955	-0.35			0.619	5.2425	4.6275	-0.897		2.362	-2.35	-1.967	0.8155	1.53433	-1.72	-1.72			-0.35		1.5315	1.6285	0.0625	-0.8845	1.3135
TCGA-A8-A082-01	0.724	-0.174	0.898	-0.34	-1.3995	-0.588	-1.23917	-1.6805	-0.8635	-1.4405	-0.9465	-1.7865	-1.3245	-1.3185	-1.1585	-0.98783	-1.978	-1.6805	-0.4115	-2.0975	-0.8105	-1.7095	-1.577	-2.0545	-1.5555	-0.34			5.4895	7.8215	6.476	0.6785		0.4715	-1.2215	-0.699	1.8195	1.53417	-2.87	-2.87			-0.34		2.5895	3.1915	0.7505	0.8065	2.0145
TCGA-A8-A083-01	0.3685	0.136	0.2325	-1.6675	-3.773	-4.1385	-5.37683	-4.8455	-3.427	-3.3685	-3.5185	-3.1695	-3.966	-4.8265	-3.8605	-2.22817	-3.9505	-4.8455	-4.6145	-2.914	-3.601	-2.7315	-4.1165	-4.125	-4.9	-2.9145			0.5	6.446	4.62	-1.5945		0.4085	0.838	-3.01	-4.546	0.2455	-5.5585	-5.5585			-2.9145		1.031	2.595	1.7475	-2.8765	3.263
TCGA-A8-A084-01	0.34775	0.43225	-0.0845	0.25375	-1.44375	-1.50375	-1.54408	-2.21325	-1.68575	-2.23125	-1.57625	-1.17025	-1.73025	-2.31225	-0.46675	-0.24508	-0.97825	-2.21325	-2.61775	-2.37225	-2.91725	-1.34925	-2.46525	-1.97425	-1.04725	-0.37575			5.58975	7.46775	7.14725	1.51625		0.21525	-0.45275	-1.61925	2.40075	2.67292	-2.57675	-2.57675			-0.37575		1.54975	3.03625	1.40475	-0.68075	2.10425
TCGA-A8-A086-01	-0.2605	-0.2285	-0.032	-1.552	-2.689	-1.51	-1.88983	-2.133	-1.742	-1.272	-1.8765	-2.471	-1.6625	-3.0205	-2.7345	-0.0115	-2.449	-2.133	-2.8945	-1.9735	-2.2285	-1.4955	-2.9605	-2.0635	-2.487	-1.301			3.7545	7.4475	7.712	1.381		1.2435	0.202	0.013	1.87	2.35883	-2.8965	-2.8965			-1.301		0.374	1.875	1.2045	-1.7845	1.7365
TCGA-A8-A08A-01	0.2155	-0.2315	0.447	-0.9935	-3.1635	-2.805	-3.11017	-2.911	-2.443	-3.182	-2.6025	-2.48	-3.289	-3.0665	-2.448	-2.3845	-1.987	-2.911	-2.132	-3.51	-1.966	-2.4545	-3.0935	-3.7185	-3.055	-1.9185			4.9605	7.4215	7.383	0.717		1.8015	-2.243	-2.162	2.4055	3.49617	-3.3055	-3.3055			-1.9185		0.4705	1.6195	0.6635	-2.601	2.07
TCGA-A8-A08B-01	0.727	-0.048	0.775	1.0155	-1.5845	1.4765	-2.4745	-1.301	-1.0925	1.9095	-1.4985	-1.623	-1.0845	-1.2375	-1.6975	1.5285	-0.677	-1.301	-0.7885	-2.654	-1.06	-0.874	-2.309	-0.449	-1.3725	-1.08			2.628	6.339	5.258	1.2595		-1.0035	-2.1965	-1.146	3.4495	1.74183	-2.139	-2.139			-1.08		0.6435	4.4495	3.558	-0.7985	1.505
TCGA-A8-A08C-01	0.1575	-0.151	0.3085	-1.0205	-2.839	-3.2475	-3.2595	-3.169	-2.5065	-3.558	-2.791	-2.4525	-3.785	-2.889	-3.222	-2.57683	-2.0825	-3.169	-3.45	-4.118	-3.455	-2.956	-3.397	-3.953	-3.3655	-2.197			2.2225	7.8315	6.5225	0.152		-1.3545	-1.1945	-1.9925	2.288	2.07817	-2.63	-2.63			-2.197		0.8565	-0.123	2.596	-3.165	1.437
TCGA-A8-A08F-01	0.6165	0.039	0.5775	0.302	-0.739	-0.568	-1.51433	-1.3155	-0.5625	-0.147	-0.32	-1.7225	-1.726	-0.8165	-0.458	-0.085	-0.1425	-1.3155	-0.357	-2.42	0.2585	-0.8865	-1.283	0.012	-0.24	-0.903			5.6385	6.975	7.423	0.9885		2.1135	-1.232	-1.1095	4.0785	2.55833	-1.1985	-1.1985			-0.903		0.139	0.459	1.9785	-1.0835	0.7805
TCGA-A8-A08H-01	0.8665	-0.636	1.5025	-2.2705	-2.033	-2.441	-1.3725	-1.493	-1.402	-2.1825	-1.0425	-2.286	-2.205	-1.8965	-2.0455	-1.8465	-1.404	-1.493	-3.062	-1.594	-0.9895	-1.656	-1.986	-2.2555	-0.772	-1.4175			5.155	5.9855	4.5195	1.3015		-0.8255	-1.9885	-1.2825	1.693	2.18217	-2.453	-2.453			-1.4175		-0.495	2.6555	-0.0785	-1.258	-0.0515
TCGA-A8-A08I-01	0.559	-0.5695	1.1285	-0.1125	-1.5355	-0.746	-1.46283	-1.739	-1.7225	-1.7525	-1.523	-1.885	-1.4405	-1.254	-1.959	0.77183	-1.0255	-1.739	-0.7525	-0.855	-0.2485	-2.1645	-2.45	-2.735	-0.955	-1.689			1.1875	5.243	3.389	-1.4325		2.791	-1.8275	-3.5145	-3.9355	1.0385	-1.7915	-1.7915			-1.689		0.475	2.179	1.132	-1.435	2.3175
TCGA-A8-A08L-01	0.945	0.049	0.896	0.307	-0.6445	0.0085	-1.53267	-1.6905	-1.3485	-0.6685	-1.108	-1.443	-2.0455	-1.2595	-0.0135	1.95367	-0.4185	-1.6905	-0.5525	-0.488	0.161	-0.2855	-2.466	-0.623	-1.245	-1.534			1.0415	5.165	5.436	-0.241		2.843	-0.2335	-3.0925	1.4065	1.761	-1.4975	-1.4975			-1.534		1.814	1.867	1.5	-0.8995	1.855
TCGA-A8-A08O-01	1.3615	-0.3025	1.664	-1.56	-2.395	-1.6515	-2.42583	-2.533	-1.6715	-2.3045	-2.029	-2.2755	-2.218	-2.0005	-3.1085	-2.03183	-1.525	-2.533	-2.1355	-3.0695	-2.2035	-1.718	-2.997	-2.4335	-2.7645	-1.549			3.098	7.1565	7.4125	0.98		1.054	-1.562	-1.558	0.0335	2.52317	-2.6175	-2.6175			-1.549		0.1345	-0.699	1.252	-1.436	2.1545
TCGA-A8-A08P-01	0.2505	-0.1535	0.404	0.352	-1.9105	-1.341	-0.73133	-1.675	-0.9725	-1.1595	-1.4675	-1.7075	-1.828	-2.329	-1.9395	0.13933	-1.5705	-1.675	-0.914	-2.1255	-1.523	-1.3435	-1.929	-1.238	-1.8745	-1.7175			4.7315	7.212	6.576	0.8485		2.5325	-1.7995	1.4785	-3.855	3.24167	-2.487	-2.487			-1.7175		0.8735	0.5685	1.9795	-1.2975	1.652
TCGA-A8-A08R-01	0.018	-0.2105	0.2285	0.887	-0.1295	0.0815	-0.5575	-1.528	0.174	-0.182	-0.895	-0.8725	-2.3055	-1.235	-1.4585	0.04383	-1.4465	-1.528	0.8795	-2.3055	-0.5505	-0.7505	-1.086	0.2685	-1.049	-1.7015			4.0245	6.8555	6.578	-0.1805		0.904	-1.821	-0.9395	-3.634	2.85017	0.1905	0.1905			-1.7015		1.621	-0.341	3.2525	-1.051	0.8205
TCGA-A8-A08S-01	0.243	-0.232	0.475	-1.1105	-2.3655	0.5275	-2.24933	-2.047	-1.2315	-0.4045	-1.3745	-1.93	-2.5475	-2.368	-2.3445	-0.22167	-1.6905	-2.047	-0.79	-2.6315	-2.4005	-1.542	-2.787	-2.034	-2.407	-0.662			4.9055	7.31	7.1205	0.546		1.746	-0.533	-1.124	0.5925	2.28267	-2.8645	-2.8645			-0.662		2.8575	3.0195	-0.1475	-1.2075	3.122
TCGA-A8-A08T-01	-0.1035	-0.1075	0.004	-1.2225	-3.0315	-2.614	-2.7965	-2.4645	-2.142	-3.276	-1.843	-2.4795	-3.438	-3.448	-2.8555	-1.81383	-3.272	-2.4645	-2.2345	-4.277	-2.9715	-2.869	-3.282	-3.5065	-3.1775	-1.409			1.398	8.103	7.3245	0.3615		0.243	0.159	-1.0305	0.788	3.0015	-2.242	-2.242			-1.409		0.558	0.9735	3.2585	-1.682	0.9425
TCGA-A8-A08X-01	0.9575	-0.0375	0.995	-0.273	-0.365	-1.7795	-1.23817	-2.188	-1.7725	-2.1395	-1.2265	-0.6155	-1.623	-2.7105	-1.42	-0.2235	-1.9645	-2.188	-0.638	-2.8305	-0.2695	-1.214	-1.698	-0.2905	-1.4225	-0.63			4.4065	7.646	7.723	0.918		1.4005	-0.5435	1.6295	1.4625	3.3055	-2.0885	-2.0885			-0.63		1.112	3.456	2.704	-1.3745	1.2805
TCGA-A8-A08Z-01	1.655	0.4815	1.1735	-0.559	-2.305	-1.6485	-2.3335	-2.464	-1.748	-2.613	-1.4325	-2.1315	-2.4425	-3.5055	-3.2735	-2.5395	-2.9025	-2.464	-3.225	-1.874	-2.284	-1.8	-2.734	-2.7215	-2.494	-2.417			5.729	8.468	9.309	1.787		0.6825	-0.2005	0.9565	-1.986	3.6295	-2.4235	-2.4235			-2.417		0.396	0.4285	3.626	-1.931	1.6835
TCGA-A8-A090-01	0.845	-0.212	1.057	-0.983	-1.8425	-1.3015	-2.22833	-1.908	-1.167	-1.1255	-1.1545	-2.0755	-2.0955	-1.092	-1.25	-0.17467	-0.2635	-1.908	-0.891	-2.396	-1.4625	-1.491	-2.672	-2.5075	-1.911	-0.5745			4.625	7.252	6.8605	0.4665		2.928	-0.5085	-0.8985	4.4195	2.75867	-2.665	-2.665			-0.5745		0.56	-0.254	0.774	-1.721	2.865
TCGA-A8-A091-01	0.2115	-0.1205	0.332	-2.391	-2.894	-1.94	-2.46433	-3.0875	-1.943	-2.5125	-1.8975	-2.958	-2.929	-2.6655	-2.8275	-1.06533	-3.0845	-3.0875	-3.158	-3.0075	-2.8615	-2.686	-3.1465	-3.4205	-3.0835	-1.5505			1.1015	6.289	4.679	-0.4025		-0.308	0.273	-2.4985	3.158	1.13133	-3.097	-3.097			-1.5505		0.611	2.976	1.5655	-1.9685	2.0395
TCGA-A8-A092-01	0.1625	-0.081	0.2435	0.9365	-0.442	-0.375	-1.52	-1.1445	-1.489	-0.3365	-0.692	-0.7115	-1.061	-2.3155	-2.016	0.607	-1.629	-1.1445	-2.2265	-2.754	-1.543	-0.5565	-1.877	-0.881	-0.859	-0.534			2.77	6.204	5.62	0.1325		3.197	-2.066	-2.0495	1.214	1.07867	-1.128	-1.128			-0.534		-0.0805	4.502	1.697	0.6195	1.443
TCGA-A8-A093-01	-0.0115	-0.284	0.2725	0.1765	-2.4565	-1.9165	-2.80533	-2.608	-2.854	-2.595	-2.4315	-2.282	-2.481	-2.1555	-2.765	-1.48633	-1.567	-2.608	-1.8125	-4.2675	-1.72	-1.7045	-3.2485	-3.5055	-2.8435	-1.3255			1.5675	7.68	7.9655	0.107		2.648	-1.1325	-2.337	-3.314	3.795	-3.5825	-3.5825			-1.3255		0.6205	3.0565	-0.136	-2.4735	2.4015
TCGA-A8-A094-01	0.198	-0.293	0.491	-1.3175	-2.084	-2.546	-0.88783	-2.31	-0.458	-2.171	-0.9105	-2.0665	-1.513	-1.486	-1.951	-0.95217	-0.6535	-2.31	-0.4085	-2.976	-1.352	-1.7295	-1.448	-0.7265	-0.647	-0.9845			3.165	7.1355	7.1335	0.57		0.2135	-0.4435	0.553	0.4345	3.0515	-2.1785	-2.1785			-0.9845		1.5825	5.056	2.678	-0.061	2.3945
TCGA-A8-A095-01	0.368	0.1885	0.1795	0.2935	-1.1055	-1.5905	-1.278	-1.546	-0.9805	-1.1935	-1.255	-1.0015	-1.368	-2.087	-1.405	0.417	-0.196	-1.546	-0.4995	-1.2735	-1.555	-1.2265	-1.995	-1.9065	-1.625	-0.1805			4.03	7.3895	6.4135	-0.25		2.2935	-1.5075	-1.854	2.847	2.27967	-2.065	-2.065			-0.1805		0.279	3.303	3.0965	-0.403	2.0545
TCGA-A8-A096-01	2.19325	-0.40175	2.595	-0.86375	-2.40275	-2.18975	-2.46208	-2.77225	-1.39125	-2.61225	-2.02275	-1.85475	-2.37425	-2.54625	-1.76275	-1.50075	-1.60175	-2.77225	-1.31875	-3.19675	-1.75925	-1.65875	-2.39175	-2.85125	-2.84975	-0.88975			5.01875	7.91875	8.30525	0.86175		1.75025	-0.29625	1.72725	-1.77925	2.95692	-2.66825	-2.66825			-0.88975		0.74325	5.40125	2.37325	-1.14925	1.63925
TCGA-A8-A097-01	0.9825	-0.1945	1.177	0.036	-0.9285	0.752	-1.57917	-1.7395	-0.819	0.7165	-0.971	-2.2855	-2.6185	-2.5695	-1.0725	-0.43183	-2.1045	-1.7395	-0.016	-2.3575	-0.332	-1.398	-2.631	-1.4605	-0.8055	-0.073			6.2795	7.7875	7.7985	1.5885		2.694	-1.6285	0.358	-3.06	2.95617	-1.797	-1.797			-0.073		1.2605	3.698	2.1365	-2.1285	2.6715
TCGA-A8-A099-01	0.9	0.1215	0.7785	-1.817	-3.0115	-3.189	-4.08617	-3.8655	-2.103	-2.237	-2.74	-2.459	-3.197	-3.754	-1.863	-2.7235	-2.9895	-3.8655	-3.8525	-5.541	-3.7825	-2.566	-2.961	-3.455	-2.7875	-2.1625			2.7355	7.1125	6.968	-0.6285		2.283	-1.7215	-1.818	-3.3765	2.4225	-4.266	-4.266			-2.1625		0.7075	5.67	2.134	-2.314	2.5265
TCGA-A8-A09A-01	0.471	0.2415	0.2295	-1.304	-2.5635	-1.508	-1.97183	-3.214	-1.6065	-1.3125	-2.0845	-2.5765	-2.011	-1.2025	-1.3295	-1.7275	-1.0055	-3.214	-3.1845	-3.6375	-2.1455	-2.2	-2.665	-2.7465	-0.901	-1.505			4.44	7.466	5.791	1.0605		-1.0965	-0.925	-2.899	1.2025	2.30117	-2.8365	-2.8365			-1.505		1.314	-0.4615	0.557	-2.634	1.443
TCGA-A8-A09B-01	2.387	-0.0355	2.4225	-0.7715	-3.0975	-2.576	-3.00833	-2.634	-2.336	-2.431	-2.025	-2.804	-2.819	-2.888	-2.354	-1.621	-1.661	-2.634	-3.286	-3.7605	-2.4785	-1.983	-3.325	-2.7565	-2.5805	-1.798			2.724	6.9455	5.7015	0.0425		-0.5915	-2.4015	-2.61	0.2855	3.25533	-4.1885	-4.1885			-1.798		1.4735	0.1425	2.5415	-3.287	2.723
TCGA-A8-A09C-01	0.579	-0.3165	0.8955	-0.3555	-2.1585	-2.6755	-2.62833	-2.4425	-1.932	-2.4355	-2.0835	-1.1495	-2.477	-1.7685	-2.0475	-0.83067	-0.4885	-2.4425	-0.7965	-1.251	-1.912	-1.556	-2.7435	-1.8785	-1.8215	-0.4565			4.483	7.7195	7.0765	0.041		1.4085	-1.0725	-1.5985	3.0335	2.01733	-2.9665	-2.9665			-0.4565		0.117	2.0655	0.872	-0.5895	1.8855
TCGA-A8-A09D-01	0.6435	-0.126	0.7695	-1.306	-2.4895	-2.4505	-2.24533	-2.437	-1.5045	-2.973	-1.823	-1.9775	-2.195	-1.1695	-1.2125	1.565	-1.2825	-2.437	-1.645	-3.039	-0.437	-1.992	-2.4555	-0.2635	-1.487	-1.4455			1.963	8.042	7.28	0.9015		0.7955	-2.2495	-0.3115	0.253	2.07767	-2.389	-2.389			-1.4455		0.7185	1.0875	1.405	-0.9765	2.9745
TCGA-A8-A09E-01	1.5185	0.2025	1.316	0.0815	-1.357	-0.55	-2.0225	-2.2705	-0.703	-0.285	-1.402	-2.316	-1.846	-0.762	-0.855	-0.1705	-0.13	-2.2705	-0.562	-2.7915	-1.5045	-1.215	-2.33	-1.433	-0.842	-0.6365			3.8675	6.8565	6.26	-0.1565		3.1975	-3.3215	-2.1605	3.417	2.29617	-2.9085	-2.9085			-0.6365		1.0785	5.8055	0.98	-2.351	2.547
TCGA-A8-A09I-01	1.059	-0.217	1.276	0.317	-0.32	0.5655	-0.92083	-1.495	-0.551	1.0315	-0.7645	-1.1895	-1.6965	-2.077	-1.1675	0.2015	-0.863	-1.495	0.08	-1.969	-1.7445	-1.199	-1.598	-0.499	-0.2655	-0.035			4.9795	7.766	7.0895	0.7225		0.305	-0.8415	-0.811	1.1255	2.52717	-1.7855	-1.7855			-0.035		1.6685	4.877	0.2525	0.832	2.9755
TCGA-A8-A09K-01	0.4665	0.046	0.4205	-0.1545	-2.234	-2.145	-2.5895	-2.3055	-1.461	-3.196	-1.422	-2.46	-2.2065	-3.4335	-1.827	-1.1525	-3.025	-2.3055	-1.009	-2.629	-2.633	-2.817	-2.3865	-2.7575	-2.8645	-1.249			1.8195	4.827	-0.8335	-2.4675		0.7395	-5.305	-5.394	0.755	0.18783	-2.6195	-2.6195			-1.249		0.674	-1.3065	-0.674	-2.73	1.854
TCGA-A8-A09M-01	0.099	-0.0175	0.1165	-1.109	-1.879	-1.4095	-2.0005	-1.768	-0.5105	-0.984	-0.882	-1.951	-1.9845	-2.0655	-2.0665	-0.44483	-1.9315	-1.768	-2.564	-1.7395	-1.082	-2.0115	-2.715	-2.0675	-1.5445	0.066			1.5635	7.4525	6.4325	0.194		0.9205	-2.2065	-1.401	2.497	1.48317	-2.633	-2.633			0.066		1.609	0.206	1.4405	-1.1695	1.723
TCGA-A8-A09N-01	1.008	0.5245	0.4835	-0.4295	-2.689	-1.474	-2.16567	-1.5165	-0.5605	-1.303	-0.72	-0.153	-1.219	-1.9765	-1.4305	-0.17767	-1.213	-1.5165	-2.6105	-2.3835	-1.742	-0.3295	-2.916	-0.671	-1.059	-0.3305			4.1265	7.0015	6.8915	-0.4125		-0.759	-0.9255	-2.635	5.043	3.40033	-2.761	-2.761			-0.3305		0.3325	4.8285	3.975	-0.1115	2.8245
TCGA-A8-A09Q-01	1.48	0.2335	1.2465	0.5	-1.5985	-1.6755	-2.03417	-2.051	-1.6875	-1.707	-1.395	-1.5265	-1.4705	-2.905	-2.782	-0.5405	-2.581	-2.051	-0.781	-4.8885	-0.73	-1.5895	-1.8035	-1.8215	-1.773	-1.0575			3.835	7.3115	6.7645	0.711		0.026	-1.6165	-1.622	4.217	1.25783	-3.0555	-3.0555			-1.0575		0.343	1.754	0.7275	-0.8925	1.376
TCGA-A8-A09R-01	0.4075	-0.117	0.5245	-0.325	-1.7525	-1.185	-1.7715	-2.2165	-0.804	-1.5585	-1.6005	-2.27	-2.198	-1.6015	-1.054	-1.50683	-0.9465	-2.2165	-2.665	-3.155	-2.54	-1.575	-2.333	-3.3745	-1.733	-1.4045			6.2355	7.309	7.956	1.3125		1.0355	1.0285	-0.6315	-1.1425	2.7525	-1.631	-1.631			-1.4045		1.002	6.135	0.949	-2.1335	1.9065
TCGA-A8-A0A9-01	1.5285	0.1065	1.422	-0.217	-1.965	-1.584	-2.3655	-2.1605	-1.5285	-1.991	-1.3835	-2.1735	-2.306	-2.2265	-2.9125	-1.67217	-1.2405	-2.1605	-2.9675	-3.562	-1.7755	-1.197	-2.324	-2.613	-2.5475	-1.6175			4.7155	7.5245	7.112	0.771		2.0905	-1.093	-0.0265	0.5295	2.31917	-2.9775	-2.9775			-1.6175		0.4895	0.377	1.9785	-1.888	2.216
TCGA-AR-A1AR-01	2.1055	0.2705	1.835	0.142	-0.3475	-1.4125	-0.22367	-1.1395	-1.014	-1.59	-0.0145	-0.646	-0.582	-1.422	-1.484	-1.014	-0.999	-1.1395	-1.769	-1.663	-0.7015	-1.0265	-1.068	-0.268	-0.7545	-0.747			2.284	5.8795	6.3295	0.844		-0.857	-0.9735	1.941	-2.716	2.63	-1.558	-1.558			-0.747		-1.0825	-1.2765	1.5585	0.2655	0.5865
TCGA-B6-A0RE-01	0.8465	0.374	0.4725	-0.1645	-0.705	-1.3795	-0.53733	-1.452	-1.315	-1.5115	-0.618	-0.891	-1.1435	-1.9235	-1.2215	-1.21633	-1.6685	-1.452	-0.1605	-2.761	-0.707	-0.9145	-1.7665	0.3045	-1.505	-0.567			3.027	7.1165	6.277	0.2465		-0.357	-1.2415	-0.9995	-4.0635	2.65767	-2.038	-2.038			-0.567		0.8435	0.073	2.516	1.739	1.8475
TCGA-B6-A0RG-01	2.3085	0.3585	1.95	-0.364	-2.023	-1.2695	-1.943	-2.567	-1.2855	-1.923	-1.3325	-1.565	-1.6835	-3.785	-2.6265	-0.901	-2.2375	-2.567	-1.6665	-2.3505	-1.281	-1.242	-2.9505	-2.545	-2.2675	-1.2955			2.469	7.479	5.398	0.3005		1.4815	-0.64	-5.6345	2.018	2.80233	-2.883	-2.883			-1.2955		1.299	-1.086	-0.424	-1.838	3.087
TCGA-B6-A0RH-01	0.033	-0.178	0.211	-0.7785	-1.426	-0.6395	-2.6235	-1.9015	-2.027	-0.3985	-2.3675	-1.232	-1.625	-3.169	-2.3575	0.0865	-2.4855	-1.9015	-2.3225	-3.7435	-1.5095	-0.603	-3.4615	-2.2185	-2.592	-1.3935			5.7455	6.564	7.0895	1.5105		-0.513	-0.1515	-2.2405	1.8605	4.26583	-3.9615	-3.9615			-1.3935		0.226	0.8455	3.719	-1.4355	2.3655
TCGA-B6-A0RI-01	1.544	-0.001	1.545	-0.167	-1.8995	-0.926	-1.51033	-1.914	-0.835	-0.912	-1.2315	-1.6865	-1.851	-1.963	-1.277	-0.94233	-1.0815	-1.914	-1.67	-2.449	-1.602	-1.0125	-2.3235	-2.3125	-1.9255	-0.8375			4.486	7.7185	8.377	1.569		0.859	-0.187	0.7925	2.86	3.61167	-2.168	-2.168			-0.8375		1.3115	2.6415	1.8885	-1.363	2.0165
TCGA-B6-A0RL-01	1.283	-0.018	1.301	0.3825	-1.062	-0.1795	-0.892	-1.4095	-0.0515	-1.114	-0.3175	-2.008	-0.207	-1.7805	-1.556	0.096	-0.8865	-1.4095	0.2545	-0.876	-1.1315	-0.7475	-1.715	-1.136	-1.966	0.168			0.293	2.9055	-0.1125	-2.7905		3.6035	-4.3885	-2.2715	3.0705	-0.107	-2.123	-2.123			0.168		1.244	1.275	-0.258	-1.7125	2.808
TCGA-B6-A0RM-01	-0.0175	0.0345	-0.052	-1.362	-2.232	-1.8895	-2.16533	-2.57	-1.69	-1.81	-1.733	-2.2555	-1.944	-3.253	-3.3765	0.932	-2.855	-2.57	-0.8245	-3.268	-1.706	-1.9135	-2.6485	-2.7585	-1.973	-1.1175			2.6235	6.2755	5.2885	0.6145		0.3885	-3.0995	-1.204	2.753	0.597	-3.2935	-3.2935			-1.1175		1.561	-0.5855	2.233	-1.9015	2.502
TCGA-B6-A0RN-01	1.798	-0.079	1.877	-2.01	-3.7975	-3.909	-4.8845	-4.2415	-3.5625	-3.85	-3.729	-3.344	-3.4505	-4.321	-3.903	-2.7025	-3.3815	-4.2415	-3.298	-5.0635	-3.6185	-3.565	-4.229	-4.4775	-4.1795	-2.707			4.0295	7.9735	8.7435	1.157		-0.1115	-1.28	-0.6595	0.2065	3.72783	-4.954	-4.954			-2.707		0.237	-0.7085	2.9725	-2.247	2.1965
TCGA-B6-A0RO-01	1.217	-0.339	1.556	-0.973	-3.712	-4.077	-3.7345	-4.34	-3.371	-3.393	-4.322	-2.4305	-3.296	-3.426	-2.578	-2.4305	-2.368	-4.34	-2.329	-2.505	-3.6905	-3.042	-4.267	-3.5585	-2.6855	-2.125			0.7485	6.207	2.0595	-1.8675		2	-2.8155	-5.134	2.6985	1.5185	-4.508	-4.508			-2.125		-0.784	2.3375	1.7025	-0.981	2.3845
TCGA-B6-A0RS-01	3.363	0.242	3.121	-0.5255	-1.1655	-1.719	-1.8025	-2.1505	-1.264	-0.7335	-2.021	-0.41	-1.0885	-3.185	-0.4495	-0.03517	-2.1005	-2.1505	-1.381	-3.729	-1.474	-1.155	-1.7345	-0.215	-0.1575	-0.5715			3.7695	6.973	5.944	-0.7035		0.1305	-0.871	-0.44	-3.278	2.3635	-3.193	-3.193			-0.5715		0.425	4.085	2.486	0.3145	1.4575
TCGA-B6-A0RT-01	1.611	0.3015	1.3095	-1.2045	-0.0905	-1.7075	-0.493	-1.6515	-1.5705	-1.604	-1.3805	-0.26	-1.5505	-0.952	-1.845	-0.02733	-0.703	-1.6515	-0.4335	-2.152	-1.0725	-1.4765	-1.135	-0.601	-1.099	-1.2665			1.1175	5.5355	3.3275	-0.459		1.8715	-3.511	-3.0405	0.0295	1.96767	-0.7445	-0.7445			-1.2665		-0.1885	-0.8145	2.07	-0.3535	0.6365
TCGA-B6-A0WS-01	0.6055	-0.256	0.8615	-1.6285	-3.039	-2.5445	-1.73967	-2.3025	-2.1195	-2.6175	-2.0785	-2.8205	-2.5275	-2.888	-2.4195	-1.70067	-2.3595	-2.3025	-2.582	-3.5695	-2.5425	-2.6035	-3.003	-2.4845	-2.906	-1.364			4.0995	6.4855	7.346	0.2125		1.6065	-2.542	-1.3345	3.0215	4.189	-3.6895	-3.6895			-1.364		0.549	4.6945	3.495	-1.965	1.735
TCGA-B6-A0WT-01	0.9315	0.39	0.5415	-0.873	-2.8655	-1.602	-2.75933	-2.82	-0.9425	-1.8145	-1.706	-2.3125	-1.6415	-3.016	-1.7675	-0.971	-2.378	-2.82	-1.146	-2.6675	-3.2725	-2.251	-2.4595	-2.2335	-1.357	-0.786			5.273	7.5065	7.7005	0.6725		0.9585	-2.146	-0.069	2.231	3.152	-4.006	-4.006			-0.786		-0.3335	2.6105	2.4855	-1.767	2.059
TCGA-B6-A0WV-01	1.304	0.268	1.036	-0.554	-2.5235	-0.8245	-1.50517	-2.048	-1.5585	-0.9885	-1.133	-1.1535	-1.3565	-2.379	-0.419	-0.79517	-1.675	-2.048	-0.5485	-1.0645	-2.48	-0.8525	-2.6145	-1.7585	-1.036	-1.089			3.5655	6.7535	5.187	-0.077		2.705	-2.336	-3.419	-1.297	2.04317	-2.989	-2.989			-1.089		0.846	1.708	1.3625	-1.001	1.463
TCGA-B6-A0WW-01	0.8595	0.53	0.3295	-0.3445	-2.489	-2.0245	-2.28583	-2.297	-2.256	-1.6865	-1.718	-1.2135	-3.034	-2.8485	-2.6505	-0.17717	-2.386	-2.297	-1.0955	-3.4545	-2.708	-1.2475	-2.4615	-2.008	-2.0605	-1.3145			3.7755	7.5035	6.9445	0.4875		0.715	-0.761	-0.5385	-1.2825	2.5175	-3.548	-3.548			-1.3145		1.0205	3.625	1.429	-2.508	2.993
TCGA-B6-A0WY-01	1.1065	-0.4915	1.598	-2.274	-3.4155	-2.4375	-2.93967	-3.34	-2.4085	-2.522	-2.8385	-2.51	-2.9135	-4.297	-2.561	-1.02867	-2.9645	-3.34	-2.57	-2.8315	-3.4095	-2.2595	-3.7095	-2.8205	-2.3835	-1.8515			2.8305	7.5435	4.3295	0.1745		0.531	-1.711	-3.743	-1.855	2.385	-3.602	-3.602			-1.8515		0.005	-0.0035	2.889	-1.889	2.0315
TCGA-B6-A0WZ-01	1.119	-0.208	1.327	-1.0535	-3.0845	-2.3085	-1.91867	-2.5835	-2.1715	-2.5235	-2.3355	-1.5515	-3.0925	-3.106	-2.294	-0.41333	-1.757	-2.5835	-1.1195	-2.8195	-2.6995	-2.1025	-3.7135	-2.8235	-2.063	-1.165			4.917	7.97	6.726	0.982		1.6755	-1.49	-0.995	0.2265	2.50867	-3.5325	-3.5325			-1.165		0.8615	0.0215	2.3555	-0.7145	2.428
TCGA-B6-A0X1-01	0.7495	-0.2665	1.016	-0.5495	0.179	-0.0945	0.92517	-1.015	0.052	-0.4715	-0.3645	-0.6105	-0.123	0.33	-1.5175	-2.04517	-0.145	-1.015	-0.2415	-1.2205	1.5825	-1.2695	-1.1185	-0.675	0.064	-1.2235			0.6585	2.725	1.455	-0.402		0.68	-1.272	-2.0595	1.9425	2.4765	-0.53	-0.53			-1.2235		1.7505	-1.258	1.1865	-0.713	1.3875
TCGA-B6-A0X4-01	0.49475	-0.55825	1.053	-3.29275	-2.90325	-3.51825	-3.93608	-3.85975	-2.50925	-3.50625	-2.55225	-3.33825	-3.69925	-3.50425	-3.41125	-2.74042	-3.42525	-3.85975	-3.31275	-3.73275	-3.85525	-3.28125	-4.01475	-3.85375	-2.93125	-2.20475			0.85925	3.97175	3.90975	-0.58625		-1.05075	0.53075	-1.97575	-1.14475	0.25325	-4.03875	-4.03875			-2.20475		0.28525	3.30025	0.80775	-3.78075	1.45825
TCGA-B6-A0X5-01	0.413	0.2525	0.1605	0.1385	-1.324	-0.4405	-0.9785	-1.175	0.0165	-0.9665	-0.268	-0.443	-1.0505	-1.607	-0.316	0.30117	-1.129	-1.175	0.3915	-0.435	-4.2245	-0.612	-0.5755	-0.9065	-1.2385	0.072			2.4295	5.927	5.886	-0.685		3.3135	-3.7395	0.3355	-3.1865	0.89483	-6.9415	-6.9415			0.072		1.3375	3.097	1.412	-0.2645	1.6285
TCGA-BH-A0AW-01	0.513	-0.393	0.906	-1.0665	-1.946	-2.857	-1.13917	-1.749	-2.0045	-2.698	-2.252	-1.426	-2.304	-2.976	-1.7875	0.38917	-0.8985	-1.749	-0.995	-2.4685	-1.3595	-1.6735	-2.2345	-1.848	-2.367	-0.379			3.38	7.4455	6.2085	0.3815		0.1365	-0.719	-1.026	4.8365	1.9795	-2.7185	-2.7185			-0.379		1.9125	3.924	0.599	0.7855	2.939
TCGA-BH-A0AY-01	2.3285	-0.2625	2.591	-0.8895	-2.4885	-2.7655	-2.04117	-1.918	-1.791	-2.36	-1.6985	-1.4785	-2.279	-2.478	-2.021	-0.0575	-1.706	-1.918	-1.699	-3.912	-2.037	-1.584	-2.877	-1.7555	-1.8705	-1.3145			3.165	7.051	7.6745	0.1745		-1.0565	0.7625	-0.3375	1.7935	3.18083	-3.1135	-3.1135			-1.3145		0.0835	0.3185	3.2235	-1.1395	1.438
TCGA-BH-A0B1-01	2.291	-0.0765	2.3675	0.003	-2.2755	-2.011	-2.37667	-2.747	-1.5155	-1.7275	-1.2055	-2.938	-1.663	-2.8555	-1.6965	0.515	-1.791	-2.747	-0.7295	-4.055	-1.285	-1.585	-2.992	-2.12	-2.081	-1.2475			4.421	6.9945	4.7575	-0.36		1.125	-2.1245	-2.766	3.3785	3.16367	-2.479	-2.479			-1.2475		0.8705	2.882	2.749	-1.531	2.88
TCGA-BH-A0B3-01	1.206	0.311	0.895	0.2125	-0.584	-0.692	0.37283	-0.96	-0.395	-0.9845	-0.614	-0.7305	-1.221	-1.2035	-0.6535	0.49083	-0.708	-0.96	-0.0505	-1.401	0.139	-0.7475	-1.245	-0.215	-0.179	-1.432			3.542	7.6705	6.717	2.1285		0.8615	-0.1365	-1.1845	-2.7805	3.2945	-0.9065	-0.9065			-1.432		0.813	-1.183	4.634	0.7515	0.675
TCGA-BH-A0B8-01	1.3625	0.2705	1.092	-1.3315	-2.5475	-2.361	-2.4385	-3.3295	-2.368	-1.7425	-2.1065	-2.261	-2.2005	-3.035	-1.634	-0.8755	-1.8605	-3.3295	-0.695	-3.886	-1.928	-2.6255	-3.237	-2.591	-2.0135	-1.8275			2.3975	7.4545	6.0435	0.099		3.423	-0.457	-1.6125	-0.3915	2.43217	-4.141	-4.141			-1.8275		-0.256	4.983	0.433	-1.5475	2.8295
TCGA-BH-A0B9-01	-0.44675	-0.28375	-0.163	-0.04875	-1.20175	-1.62225	-0.90225	-1.21075	-1.25125	-1.18925	-0.89425	-1.23475	-0.81725	-2.14975	-1.81775	-0.72758	-0.71175	-1.21075	-0.96025	-1.69525	-0.66275	-0.39325	-2.18675	-1.04325	-1.71075	-0.00125			2.15375	5.30875	3.50675	-1.32625		-0.68425	-1.98875	-3.81225	1.08275	0.50242	-1.04825	-1.04825			-0.00125		0.29325	-1.00375	2.79825	0.19875	0.24425
TCGA-BH-A0BC-01	1.2335	0.0705	1.163	-0.4885	-2.182	-2.5875	-2.04	-2.061	-1.2405	-2.633	-2.766	-1.12	-2.1515	-2.1365	-1.3405	-0.58	-0.756	-2.061	-1.0245	-2.281	-1.42	-1.814	-2.366	-1.832	-2.076	-0.877			1.5635	7.3315	5.67	0.177		0.769	-1.9795	-4.6535	1.64	2.95167	-4.091	-4.091			-0.877		0.2865	0.341	3.261	-0.079	2.203
TCGA-BH-A0BD-01	1.507	-0.0865	1.5935	1.008	-0.524	-0.9785	-1.41067	-1.525	-0.6655	-1.8575	-1.327	-1.395	-1.3225	-0.6985	-1.437	-0.91133	-0.073	-1.525	-0.474	-2.8055	-0.895	-1.088	-1.941	-2.0185	-1.2305	-0.92			3.6105	7.0885	5.46	-0.2735		1.8675	-1.7595	-2.589	2.117	2.407	-1.798	-1.798			-0.92		-0.1425	-0.688	1.6555	-0.7275	1.8235
TCGA-BH-A0BM-01	2.8165	-0.436	3.2525	-4.1445	-5.4925	-4.8745	-5.185	-4.331	-4.198	-3.93	-4.1415	-3.668	-4.621	-5.4725	-4.582	-1.736	-4.5	-4.331	-4.0545	-5.112	-4.6375	-3.7615	-4.853	-4.3985	-4.281	-3.2375			3.6685	8.068	6.7025	0.2885		0.391	-0.686	-1.2135	-2.1345	2.16367	-5.1875	-5.1875			-3.2375		-0.0085	3.927	4.162	-3.284	2.2755
TCGA-BH-A0DZ-01	1.858	-0.151	2.009	-0.6525	-1.9995	-2.363	-1.361	-1.9785	-1.032	-2.075	-1.909	-1.2955	-2.601	-2.188	-0.764	-0.08867	-0.3175	-1.9785	-0.742	-2.233	-1.315	-0.5345	-1.604	-1.969	-2.05	-0.1945			5.468	8.29	7.63	2.0745		1.2605	0.398	-0.3315	-0.107	3.42367	-2.4115	-2.4115			-0.1945		1.6775	5.053	2.084	0.8505	2.225
TCGA-BH-A0HW-01	0.5905	-0.3145	0.905	-1.702	-2.3335	-1.062	-1.6115	-2.3815	-1.196	-1.0305	-1.364	-2.811	-1.922	-2.5695	-3.197	0.3625	-2.1895	-2.3815	-1.602	-2.1405	-2.8225	-2.1	-2.8255	-3.0275	-1.91	-0.7755			1.484	4.991	4.419	-1.383		2.839	2.133	-2.833	3.0655	-0.0975	-1.9525	-1.9525			-0.7755		0.5965	-0.4435	-0.445	-1.292	2.3955
TCGA-BH-A0HX-01	2.0315	-0.401	2.4325	-0.625	-2.633	-2.1035	-2.30783	-2.2675	-2.1485	-2.2985	-1.4615	-1.973	-3.041	-3.171	-2.449	-0.0805	-2.231	-2.2675	-1.0905	-2.9185	-1.196	-1.641	-4.0485	-2.5765	-2.3165	-0.787			5.048	7.7855	7.4535	0.735		0.415	-1.074	1.139	0.6775	2.7885	-2.6985	-2.6985			-0.787		-0.0825	3.8505	2.671	-1.9605	2.765
TCGA-C8-A12K-01	0.492	0.1935	0.2985	1.106	-0.6815	-1.5675	-0.068	-0.3135	-0.514	-0.8455	-1.1555	-0.535	-0.2145	-0.4045	-1.615	1.661	0.545	-0.3135	-0.995	-1.062	-0.057	-0.9125	-1.7925	-0.853	-0.9715	-0.726			4.587	6.225	5.7755	-1.3075		-0.45	-1.563	-0.9185	-3.7705	4.075	-0.146	-0.146			-0.726		0.3965	-0.0155	1.9785	-0.1385	0.8085
TCGA-C8-A12L-01	0.6315	0.3945	0.237	-0.1005	-0.0605	-1.487	-0.10233	-0.121	-0.4145	-1.1665	-1.457	-0.714	-0.332	-1.744	-0.8655	0.68167	-0.6305	-0.121	-1.365	-0.5055	-0.825	-1.2805	-1.494	1.0535	1.0175	-1.275			5.584	6.714	6.9575	-0.233		-1.31	0.721	-0.382	-0.649	2.51767	-0.0185	-0.0185			-1.275		0.715	2.5485	2.47	0.767	1.239
TCGA-C8-A12M-01	-0.5245	-0.748	0.2235	-2.893	-1.943	-3.8215	-2.37483	-2.3605	-1.997	-3.848	-2.15	-2.871	-2.4865	-3.609	-1.9205	0.26083	-3.36	-2.3605	-2.9975	-2.869	-4.5025	-2.6145	-3.107	-2.956	-1.9675	-0.848			0.693	6.1675	4.2865	-1.3025		-1.5725	1.254	-2.64	2.0835	1.11517	-2.989	-2.989			-0.848		0.3095	0	-0.1745	-2.1785	2.5315
TCGA-C8-A12O-01	1.1045	0.1785	0.926	-0.887	-2.3745	-2.236	-1.342	-1.756	-1.3465	-0.898	-1.974	-1.981	-1.333	-2.928	-2.1175	-0.801	-1.786	-1.756	-2.1765	-2.94	-2.373	-1.732	-1.8435	-1.25	-1.129	-1.975			5.1895	6.579	7.3355	0.838		2.5545	-0.834	0.523	3.1375	3.72167	-1.5925	-1.5925			-1.975		-1.2005	4.087	1.8295	-1.0025	-0.859
TCGA-C8-A12P-01	0.7705	-0.0055	0.776	-0.952	-1.152	-3.2785	-0.72567	-2.0705	-1.7815	-1.3655	-1.6385	-1.3405	-1.2835	-2.8515	-1.2165	0.118	-2.1905	-2.0705	-1.7655	-3.8355	-2.3835	-0.808	-1.7365	-1.057	-0.8365	-0.2085			5.964	6.163	8.0965	0.48		-1.7435	-0.531	-0.0435	1.019	3.52433	-3.7135	-3.7135			-0.2085		-0.7485	3.388	1.148	0.5635	1.8255
TCGA-C8-A12Q-01	0.7075	-0.5415	1.249	-0.474	-2.549	-3.2525	-1.9145	-2.474	-1.7185	-2.847	-1.8425	-1.8985	-2.7805	-2.9485	-2.1605	-1.17583	-1.841	-2.474	-0.8545	-2.8685	-1.8415	-1.91	-3.11	-2.3285	-1.435	-0.983			5.144	6.307	6.8055	0.91		-1.7625	-0.8825	-0.13	2.153	2.92617	-2.5325	-2.5325			-0.983		1.5355	3.213	2.8585	-1.175	2.37
TCGA-C8-A12T-01	0.4015	-0.338	0.7395	-0.6845	-1.0795	-1.447	-0.91533	-0.679	-0.696	-1.2875	-1.252	-0.058	-0.5485	-0.3875	-0.266	0.94133	-0.24	-0.679	-1.2145	-3.1585	-0.155	-0.1615	-1.93	-1.216	-0.4875	-1.046			5.8795	6.2315	8.3565	0.3925		0.064	1.4315	0.754	3.979	3.58267	-1.7975	-1.7975			-1.046		1.0765	0.9505	2.9245	1.0715	2.1725
TCGA-C8-A12U-01	0.533	-0.2595	0.7925	0.881	-0.576	-1.3635	-0.9065	-1.095	-0.684	-2.057	-0.817	-0.792	0.3975	-0.726	-0.127	1.67117	-0.581	-1.095	0.5665	-1.86	-0.1985	-0.7155	-1.9175	-1.1835	-0.3955	-1.2935			-0.442	4.23	3.1815	-1.7355		3.3825	-1.1115	-4.5525	4.5135	1.26083	-1.511	-1.511			-1.2935		0.8015	0.247	-0.487	-0.5715	3.2605
TCGA-C8-A12V-01	1.1005	0.2325	0.868	-0.284	-1.684	-2.078	0.24167	-1.942	-1.9905	-2.04	-1.2815	-1.431	-0.285	-1.074	-1.275	-0.046	0.1045	-1.942	-1.3155	-2.9375	-1.205	-1.504	-2.1255	-1.7205	-0.8405	-1.3485			1.442	5.9445	5.1855	-1.3625		-2.4275	-0.86	-1.706	-2.8885	4.76433	-2.147	-2.147			-1.3485		-0.0855	-0.1785	2.8	-1.7925	0.419
TCGA-C8-A12W-01	-0.0465	-0.601	0.5545	0.202	-1.5015	-1.1455	-1.6405	-1.0845	-0.971	-0.926	-1.5995	-2.3655	-1.4955	-2.502	-1.855	0.03483	-1.45	-1.0845	-2.3055	-2.0585	-2.127	-1.7705	-2.3745	-1.1915	-0.996	-0.4775			6.526	7.1995	7.5605	1.967		2.389	-2.3165	0.3215	4.9355	3.05017	-1.1075	-1.1075			-0.4775		0.989	0.2465	3.463	-0.3775	1.3445
TCGA-C8-A12Y-01	1.0825	0.2315	0.851	-0.226	-0.943	-1.7365	-1.38667	-1.979	-2.484	-1.655	-1.6385	-1.424	-1.4815	-3.041	-4.0525	-0.92867	-2.573	-1.979	-1.8255	-2.599	-1.371	-1.449	-3.381	-2.045	-2.4895	-1.845			4.152	6.8195	6.672	-0.021		0.695	-0.9545	-2.6495	3.7275	4.22767	-2.545	-2.545			-1.845		0.4715	1.2535	1.1025	-0.8505	2.1665
TCGA-C8-A12Z-01	0.8855	0.108	0.7775	-0.0935	-1.2305	-0.9135	-1.38383	-2.17	-1.1035	1.0035	-1.0745	-0.918	-0.912	-2.255	-0.9815	1.03017	-1.1845	-2.17	-1.492	-3.995	-1.156	-0.9345	-1.7475	-1.6445	-1.4455	-1.6255			5.681	6.827	7.667	0.771		2.048	-0.4595	-0.857	2.5575	3.07017	-2.274	-2.274			-1.6255		-0.445	3.769	2.6365	0.1795	1.4005
TCGA-C8-A130-01	0.903	0.6005	0.3025	0.0625	-0.944	-1.0225	-0.65667	-0.7915	-0.7905	-0.6985	-0.0925	-1.14	-1.547	-1.5585	-1.799	0.80067	-1.2285	-0.7915	-2.321	-2.491	-0.979	-0.854	-2.1005	-0.669	-1.186	-0.328			1.9455	6.645	6.8185	0.36		1.8235	0.9895	-1.6025	2.624	2.93233	-1.8975	-1.8975			-0.328		0.5395	-0.4505	2.456	-0.265	0.7975
TCGA-C8-A131-01	1.9035	-0.033	1.9365	0.3235	-1.1365	-1.681	-0.46167	-1.236	-0.9615	-1.6465	-0.7145	-0.6505	-0.73	-3.226	-2.7465	0.524	-2.031	-1.236	-0.3595	-2.726	-0.2285	-1.3395	-2.076	-0.8965	-0.8385	-0.619			5.7175	5.6965	6.9815	1.6245		1.424	-0.2865	0.047	3.7125	2.65367	-1.793	-1.793			-0.619		1.614	4.371	2.889	-0.3215	2.2605
TCGA-C8-A132-01	1.5055	-0.2655	1.771	-1.197	-2.297	-2.023	-1.92617	-2.331	-1.583	-2.6745	-1.6365	-2.329	-2.367	-3.11	-1.7935	-0.87717	-2.5785	-2.331	-2.6735	-2.538	-1.5625	-1.393	-2.744	-2.756	-1.4935	-1.727			5.7725	6.1215	6.576	0.354		-0.099	-1.2085	-1.7015	1.4495	3.76117	-3.0855	-3.0855			-1.727		1.3145	3.537	1.129	-1.466	2.3635
TCGA-C8-A134-01	0.4845	-0.0925	0.577	0.3785	-0.636	-1.0165	1.90517	-0.81	0.479	-1.7575	-0.113	-1.044	-0.6365	-1.168	-0.708	1.83717	-0.5655	-0.81	0.8425	-0.508	1.2885	-1.2375	-1.651	-1.746	-0.739	-0.4545			4.01	4.9155	3.983	-1.3235		2.84	-2.7605	-3.6425	-3.913	1.6105	-0.5885	-0.5885			-0.4545		0.7345	-0.6505	1.7895	0.1715	0.916
TCGA-C8-A135-01	1.1285	-0.2005	1.329	-0.7185	-2.4815	-1.4715	-0.75033	-2.1785	-2.425	-1.227	-0.89	-0.7005	-1.533	-3.308	-0.225	1.01067	-1.5765	-2.1785	-1.922	-3.1695	-0.975	-0.647	-2.849	-1.114	-1.6195	-0.915			4.2725	6.454	6.6415	0.3415		1.9725	-0.4	-2.091	1.9505	3.02533	-2.512	-2.512			-0.915		0.3185	2.6945	3.502	0.2695	1.827
TCGA-C8-A137-01	0.171	-0.022	0.193	-0.666	-1.983	-2.315	-1.2165	-1.339	-1.203	-2.9175	-1.119	-0.278	-0.598	-1.3025	-0.312	-1.0375	-0.827	-1.339	-1.564	-2.61	-0.486	-0.5885	-1.767	-1.491	-0.5605	-0.8135			5.487	6.856	6.9505	1.033		-2.2485	-0.9985	-1.491	3.7865	3.13517	-3.4475	-3.4475			-0.8135		1.5405	1.4545	2.1715	-0.2385	2.4625
TCGA-C8-A138-01	0.995	-0.4585	1.4535	1.1705	-1.257	0.3335	-2.99517	-2.245	-2.0345	-1.352	-2.386	-0.756	-1.548	-3.1235	-3.227	-0.50717	-2.674	-2.245	-1.844	0.8815	-2.311	-0.3115	-2.811	-2.9375	-2.152	-1.986			5.7265	6.3195	6.787	0.8855		1.8315	-2.039	-2.245	2.566	3.18617	-3.0105	-3.0105			-1.986		1.562	4.298	0.96	-0.426	2.3085
TCGA-C8-A1HF-01	1.1885	0.052	1.1365	0.111	-1.1615	-1.16	-0.50967	-0.847	-1.4335	-0.8545	-0.937	-0.3925	-0.9635	-0.5095	-1.7375	1.938	-0.022	-0.847	-2.295	-0.0335	-0.758	-0.327	-2.672	-1.176	-0.9175	0.482			4.8175	6.014	7.576	1.439		1.1025	0.0495	0.769	3.644	3.067	-1.3755	-1.3755			0.482		-0.301	0.1915	3.304	0.185	1.6935
TCGA-C8-A1HG-01	0.545	-0.202	0.747	0.2155	-0.707	-0.5675	-1.18983	-0.683	-0.6775	-0.673	-0.7415	-2.0145	-2.2165	-2.0715	-2.194	0.9255	-2.1825	-0.683	-2.3115	-2.121	-1.258	-1.246	-2.215	-1.864	-1.2115	-1.1315			3.1755	6.3035	6.79	-0.5125		2.025	-1.139	-0.4395	1.99	3.38483	-1.024	-1.024			-1.1315		-1.2	-0.4305	1.077	-1.1035	2.0335
TCGA-C8-A1HI-01	1.735	-0.0335	1.7685	-1.1445	-1.2635	-2.7595	-3.035	-3.1355	-2.82	-3.0685	-2.4465	-2.953	-2.699	-3.8205	-2.3135	-0.49333	-3.585	-3.1355	-3.6125	-3.3005	-3.162	-2.1855	-3.29	-3.6295	-2.218	-2.318			2.339	6.075	5.383	-1.3875		-1.3755	-2.0315	-4.545	0.482	2.9	-2.72	-2.72			-2.318		-1.3675	5.381	2.153	-3.2685	2.446
TCGA-C8-A1HM-01	0.6295	-0.0275	0.657	0.607	0.3025	-0.0465	-1.02133	-0.8895	-0.1555	-0.3645	-0.639	-0.886	-0.708	-0.776	-0.8315	1.634	-0.4505	-0.8895	-2.01	-1.2395	-1.473	-1.0245	-1.636	0.1515	1.0165	-1.0255			1.2445	5.269	4.771	0.9355		2.7605	-1.5555	-2.137	2.4635	1.45433	-0.519	-0.519			-1.0255		0.778	2	2.21	2.3505	1.1505
TCGA-C8-A1HN-01	1.0785	-0.0205	1.099	0.25	-1.1055	-0.161	-0.75867	-1.1405	-0.912	-0.6815	-0.7265	-2.0335	-2.0485	-1.454	-0.9145	1.001	-0.9735	-1.1405	-1.6005	-1.529	-1.5825	-1.314	-2.667	-2.0825	-1.2845	-0.427			3.6045	5.7715	6.5855	0.692		2.4185	0.2335	-0.974	1.3525	2.08467	-0.488	-0.488			-0.427		-0.5555	4.188	0.932	-2.718	1.951
TCGA-D8-A13Z-01	1.662	0.34	1.322	0.0505	-0.869	-2.1105	-0.1395	-2.294	-1.321	-1.264	-1.9725	-1.964	-1.1445	-3.327	-0.04	0.71583	-2.1075	-2.294	-0.9995	-1.611	-1.5405	-0.5535	-2.4445	-0.5045	-1.1765	-1.387			4.051	6.3765	7.256	0.5165		-1.6395	-0.532	0.6945	2.213	3.58383	-2.279	-2.279			-1.387		0.3395	5.488	3.6215	0.3385	0.6475
TCGA-D8-A141-01	1.954	-0.3725	2.3265	-2.002	-2.8745	-3.123	-2.72517	-2.582	-2.847	-2.976	-2.523	-2.556	-2.952	-3.2005	-2.599	-1.9805	-1.906	-2.582	-3.4215	-3.668	-2.3005	-2.677	-3.1535	-3.3645	-2.48	-2.275			6.1705	7.109	8.908	1.09		-1.361	0.3325	1.019	2.673	4.15417	-3.2255	-3.2255			-2.275		0.618	-0.2915	1.7935	-2.146	1.463
TCGA-D8-A146-01	1.668	-0.005	1.673	-1.9345	-2.031	-3.656	-3.04483	-3.429	-2.905	-4.201	-2.7005	-2.5885	-3.0595	-3.3065	-2.9935	-2.08983	-2.8185	-3.429	-3.7605	-4.2795	-3.036	-2.403	-3.488	-3.5485	-3.082	-1.743			4.917	6.7135	7.5985	0.8465		0.3825	-2.2055	0.9955	-2.8005	3.9815	-3.435	-3.435			-1.743		0.0765	3.14	1.028	-2.2275	1.7025
TCGA-D8-A147-01	0.1185	0.1405	-0.022	-0.61	-0.131	-0.6775	0.15167	-1.1775	-0.808	-1.1385	-0.5335	-0.776	-1.2585	-1.437	-1.7715	0.36867	-0.837	-1.1775	-1.586	-1.026	-0.333	-0.275	-0.762	-1.4565	-1.752	-0.0845			5.3585	5.3645	5.677	-0.9575		1.0105	-1.315	-1.5955	-0.443	1.727	-0.7035	-0.7035			-0.0845		-1.2595	0.166	0.719	1.7155	0.8145
TCGA-E2-A105-01	0.503	-0.102	0.605	-1.054	-2.2665	-0.3645	-1.44567	-2.433	-1.24	-1.8615	-1.2555	-2.393	-2.2655	-2.6755	-1.873	-0.89833	-2.08	-2.433	-1.1015	-2.2305	-3.353	-1.837	-2.5985	-3.3505	-2.351	-0.396			1.251	6.72	4.366	-0.416		0.567	-1.877	-2.536	-2.368	0.832	-2.7455	-2.7455			-0.396		0.6965	-0.521	0.106	-2.6075	2.1635
TCGA-E2-A106-01	1.389	-0.192	1.581	-2.2375	-1.282	-2.701	-3.48017	-3.9645	-2.235	-2.418	-2.973	-3.624	-3.3425	-4.9825	-3.3615	-1.3175	-3.7725	-3.9645	-2.161	-3.9585	-3.5365	-2.736	-3.4035	-3.294	-2.6225	-2.4385			0.715	5.77	3.8045	-1.188		1.499	0.1365	-4.256	2.403	0.62383	-3.4655	-3.4655			-2.4385		0.422	5.7585	-0.058	-2.998	2.9055
TCGA-E2-A108-01	2.6735	-0.568	3.2415	-0.8795	-1.778	-2.7215	-1.72067	-2.694	-1.889	-2.3995	-2.1265	-2.7075	-1.932	-2.9715	-2.5655	-0.101	-1.583	-2.694	-1.088	-3.4385	-1.4185	-2.509	-2.741	-2.0575	-1.4955	-1.3595			1.224	7.1835	6.177	-0.327		0.757	-1.553	-0.7155	-1.9205	2.47567	-2.1405	-2.1405			-1.3595		-0.2965	2.242	2.6085	-2.4695	-0.049
TCGA-E2-A109-01	-0.1215	-0.4055	0.284	-0.7575	-1.041	-0.7085	-0.40483	-0.8355	-0.571	-1.071	-0.508	-0.856	-1.589	-2.5765	-1.834	0.5825	-1.7585	-0.8355	-0.406	-2.039	-0.7715	-1.4485	-2.005	-1.591	-1.9945	-0.084			5.694	7.2335	6.9315	0.378		1.463	-1.9945	-0.6515	3.374	3.17583	-1.4785	-1.4785			-0.084		1.0845	2.7665	0.5915	0.3285	2.323
TCGA-E2-A10A-01	0.92	-0.1285	1.0485	-0.6685	-1.238	-1.2235	-1.52883	-1.5005	-0.324	-2.138	-0.7455	-1.453	-1.0845	-2.095	-2.325	-1.02483	-1.415	-1.5005	-1.618	-2.0515	-0.748	-1.565	-1.7125	-1.82	-1.5635	-1.391			4.741	6.6505	7.351	0.218		2.5485	-0.8585	-0.176	1.2475	3.28417	-1.775	-1.775			-1.391		0.747	4.782	2.017	-0.6345	2.5975
TCGA-E2-A10B-01	0.1445	-0.238	0.3825	-0.8335	-2.2675	-2.55	-2.59867	-2.7005	-1.7465	-2.3255	-2.218	-1.9565	-2.305	-2.786	-2.4035	-2.29467	-1.4625	-2.7005	-2.092	-1.879	-2.2325	-1.8615	-2.3395	-3.2335	-2.3365	-1.1315			2.5945	7.2565	7.4785	0.4995		1.974	-1.1475	0.006	1.361	1.81	-2.978	-2.978			-1.1315		-0.2845	4.7455	0.8685	-1.442	2.4155
TCGA-E2-A10C-01	0.9715	-0.0295	1.001	-0.3875	-1.449	-1.488	-1.758	-1.4905	-1.3915	-2.0465	-1.7415	-1.8555	-2.434	-2.7505	-3.175	0.37267	-1.561	-1.4905	-0.831	-2.893	-1.9985	-1.4165	-3.444	-2.4325	-2.177	-1.125			5.3945	6.7845	6.101	0.3825		2.2985	-2.1015	-1.3485	4.7875	0.91433	-1.8145	-1.8145			-1.125		1.314	3.7035	0.402	0.803	2.408
TCGA-E2-A10E-01	1.488	0.0275	1.4605	-1.6085	-2.866	-2.1055	-2.67717	-3.2565	-1.6675	-1.865	-2.3545	-2.0565	-3.045	-2.89	-2.2815	-0.8335	-1.2955	-3.2565	-1.6965	-3.1595	-2.8755	-1.8245	-3.253	-2.2575	-2.65	-1.2805			3.4035	7.3205	6.399	0.822		2.0515	-0.3335	-2.169	-0.6875	1.46983	-4.1065	-4.1065			-1.2805		2.0735	3.0645	1.688	-0.7555	1.8415
TCGA-E2-A14N-01	1.774	0.23	1.544	0.381	-0.2145	-1.016	0.405	-0.194	-0.773	-1.239	-0.221	0.2125	-0.8495	-1.55	-0.983	-0.17233	-1.8965	-0.194	-1.8375	-2.2075	0.7515	-0.52	-1.207	0.219	-0.7675	0.27			0.265	5.638	4.294	-0.0435		-1.8675	-3.043	-4.102	0.1985	0.959	-1.652	-1.652			0.27		-0.2095	-1.0675	3.9005	0.791	0.806
TCGA-E2-A14O-01	1.251	0.1005	1.1505	-0.186	-1.7955	-1.269	-2.71583	-2.5635	-1.908	-1.1005	-1.9585	-1.963	-1.346	-1.83	-3.2515	-0.03917	-0.559	-2.5635	-1.8505	-2.2245	-3.0455	-0.896	-3.657	-2.138	-1.6975	-1.111			4.7395	6.3455	7.1835	-0.0295		3.518	-1.499	-3.654	3.982	3.6875	-2.6335	-2.6335			-1.111		-0.8	0.351	0.6045	-1.3765	2.142
TCGA-E2-A14P-01	1.208	-0.4675	1.6755	-0.505	-1.9255	-2.4685	-1.325	-2.513	0.085	2.1475	-0.4915	-0.804	-1.992	-3.583	-0.0755	0.10667	-2.417	-2.513	-2.4205	-2.6915	-0.796	-1.035	-0.974	-1.53	-0.881	0.292			2.27	5.3215	2.638	-0.027		-1.7595	-3.9795	-4.533	3.923	1.23167	-3.0215	-3.0215			0.292		1.6575	3.1185	2.629	-1.054	2.725
TCGA-E2-A14Q-01	2.486	0.036	2.45	-0.6985	-1.931	-3.124	-2.487	-3.2155	-1.7275	-3.385	-3.0365	-1.3725	-2.258	-3.028	-3.1785	-1.07267	-1.2755	-3.2155	-1.4115	-4.034	-2.262	-2.105	-2.9025	-3.0715	-2.5325	-2.8575			1.5315	6.394	4.732	-1.256		0.6485	-2.811	-2.629	2.8945	1.28367	-2.4555	-2.4555			-2.8575		0.728	2.67	1.1895	-0.9695	2.3475
TCGA-E2-A14R-01	1.598	-0.144	1.742	-0.3035	-0.703	-1.1815	-0.148	-1.322	-0.5405	-1.665	0.0885	-0.581	-0.342	-1.022	-1.886	1.959	-0.3225	-1.322	-0.402	0.1745	1.03	-0.446	-1.8195	-1.152	-0.9755	-1.3165			-1.0055	5.099	4.7095	0.1075		2.29	-1.4	-2.467	-3.0095	2.963	-0.661	-0.661			-1.3165		1.544	0.2515	3.889	1.041	1.6565
TCGA-E2-A14S-01	1.16075	-0.14225	1.303	-1.31425	-2.16725	-1.30875	-1.45758	-2.08925	-1.02575	-1.50725	-0.53925	-1.98575	-2.49175	-2.86425	-2.57525	0.62275	-2.30175	-2.08925	-0.50425	-2.08775	-2.57875	-1.08275	-2.40825	-2.41075	-2.51925	0.05525			-0.90325	5.95325	2.42025	-1.47825		2.16825	-1.59125	-3.82125	-0.17125	1.05175	-2.87475	-2.87475			0.05525		-0.59975	-0.92475	2.53275	-1.69575	2.14775
TCGA-E2-A14T-01	1.019	-0.3675	1.3865	-0.6295	-1.8485	-1.3055	-1.72233	-1.816	-1.237	-2.4645	-1.7325	-2.3095	-2.32	-3.274	-0.566	-0.07767	-2.5835	-1.816	-2.0685	-2.818	-1.3725	-1.533	-2.6575	-3.0745	-2.0845	-1.9005			4.0155	5.7595	5.466	-0.652		1.3375	-2.449	-2.689	3.5455	1.987	-1.5225	-1.5225			-1.9005		1.178	4.663	0.2915	-2.889	3.3795
TCGA-E2-A14V-01	1.5685	0.1385	1.43	1.07	-0.1105	0.168	-1.01417	-1.0915	-0.246	-0.174	-0.656	-0.7605	-0.4645	-1.5685	-1.4395	0.0895	-0.557	-1.0915	-0.2615	-0.8875	-0.575	-0.4825	-1.955	-1.2825	0.574	-0.0365			3.333	6.3	6.5615	0.3365		2.074	-0.2385	-1.4065	-1.2425	2.26117	-1.042	-1.042			-0.0365		0.806	2.754	2.991	-0.35	2.129
TCGA-E2-A14W-01	0.748	0.103	0.645	-0.7855	-2.1915	-1.4235	-2.06733	-1.6625	-0.652	-1.507	-0.81	-1.395	-1.9005	-3.114	-3.2115	0.37033	-2.2735	-1.6625	-1.16	-1.5805	-1.6345	-1.3055	-4.093	-2.126	-1.8795	-0.6215			4.281	6.768	6.9815	0.181		1.7175	-1.8475	0.4985	4.378	3.05833	-1.74	-1.74			-0.6215		1.732	-0.3235	3.9015	-0.398	2.8645
TCGA-E2-A14X-01	1.57225	-0.74375	2.316	0.03675	-1.05875	-2.18025	-1.80875	-1.20025	-1.07625	-2.23625	-1.46825	-1.70825	-2.15875	-2.37175	-1.42625	1.38858	-2.59325	-1.20025	-2.60375	-2.64425	-0.67675	-1.41525	-1.33425	-2.10075	-1.51125	-0.29975			2.36475	5.65525	1.69025	-1.68525		-0.75325	-3.02175	-3.01825	-3.43875	1.30592	-1.68475	-1.68475			-0.29975		1.60475	1.12775	2.26075	-0.60325	2.07875
TCGA-E2-A14Y-01	2.4305	-0.1355	2.566	-0.5935	-0.9835	-1.9095	-0.833	-0.7485	-0.403	-1.946	0.1675	-0.1575	-0.7055	-2.4015	-1.9275	1.33567	-2.1845	-0.7485	-1.436	-1.602	-0.9065	-0.1305	-1.062	-1.192	-1.551	0.3215			3.552	5.9355	5.4235	0.6325		-0.8315	-0.42	-1.2215	-0.2165	1.41533	-1.0845	-1.0845			0.3215		0.5875	1.4545	3.989	0.5025	1.1635
TCGA-E2-A14Z-01	1.588	0.449	1.139	-0.164	-1.9935	-1.938	-1.49267	-1.538	-1.6555	-2.668	-1.3915	-1.6725	-1.7295	-1.2975	-2.647	0.46667	0.1625	-1.538	-2.225	-3.245	-2.041	-1.282	-2.635	-1.9015	-0.772	-1.3005			4.0585	6.5955	5.8675	0.0915		1.4665	-1.544	-3.1205	1.4455	3.176	-2.914	-2.914			-1.3005		1.5215	-0.0855	1.9215	-0.9235	2.184
TCGA-E2-A150-01	1.365	0.2225	1.1425	-0.472	-0.876	-1.9035	-0.74767	-2.335	-1.587	-2.0485	-0.5335	-1.36	-0.913	-1.8565	-2.8165	-1.855	-1.664	-2.335	-0.164	-3.407	-0.728	-1.552	-1.91	-0.9215	-1.8245	-1.0015			2.15	5.825	5.436	0.059		-1.156	0.9655	-1.916	-4.007	2.27333	-1.6315	-1.6315			-1.0015		1.5765	-0.2975	-0.3455	1.8095	0.57
TCGA-E2-A152-01	0.7205	-0.857	1.5775	-1.0005	-2.223	-2.274	-1.625	-2.2925	-1.043	-3.3135	-1.941	-1.5655	-2.7895	-2.8665	-2.1945	-0.979	-1.634	-2.2925	-3.459	-3.53	-0.943	-1.5475	-3.067	-2.3865	-2.2225	-0.313			6.727	7.022	7.3495	2.1455		0.204	0.1825	1.6205	1.7985	3.39867	-3.3915	-3.3915			-0.313		1.751	4.9005	3.1105	0.1355	2.8785
TCGA-E2-A153-01	2.3485	-1.0245	3.373	-2.0675	-3.234	-3.4435	-3.82117	-3.7035	-2.7695	-3.677	-3.137	-2.9175	-3.877	-4.223	-3.387	-2.23917	-3.21	-3.7035	-3.894	-3.8405	-3.4935	-3.1405	-4.025	-4.0835	-3.5825	-2.6745			5.8015	7.193	8.1255	2.6015		-0.372	0.2285	2.459	1.991	4.12317	-3.4205	-3.4205			-2.6745		0.4645	1.3805	4.129	-1.9995	1.416
TCGA-E2-A154-01	1.295	-0.003	1.298	-0.219	-2.1035	-2.2475	-3.0045	-2.702	-2.105	-1.785	-2.6295	-1.762	-2.146	-1.799	-1.8875	-0.41117	-1.0665	-2.702	-2.4835	-1.9355	-2.521	-2.2505	-2.6865	-1.9175	-2.5935	-1.4315			5.8265	6.8075	7.225	0.5425		3.314	-0.1905	0.3475	2.6375	3.9345	-4.2605	-4.2605			-1.4315		1.196	2.528	2.5005	-0.8125	1.698
TCGA-E2-A155-01	1.6185	0.263	1.3555	-0.6855	-1.664	-0.5155	-1.15067	-1.962	-0.5695	-0.7385	-0.7075	-1.6335	-1.2495	-0.6435	-1.7055	-1.48133	-0.87	-1.962	0.308	-2.565	-0.373	-2.105	-1.952	-2.2065	-1.7475	0.843			-0.148	5.135	2.39	-1.3345		-3.554	-2.586	-2.9385	0.1345	0.704	-2.247	-2.247			0.843		2.0015	1.376	0.277	-1.639	1.647
TCGA-E2-A156-01	0.9555	-0.197	1.1525	-2.097	-3.011	-2.9945	-2.8125	-2.968	-2.2885	-2.4985	-2.9445	-2.6655	-2.703	-2.983	-3.0765	-1.68017	-1.8505	-2.968	-1.762	-3.9155	-2.72	-3.221	-3.563	-2.928	-2.9895	-1.3825			2.691	5.9775	5.318	-0.6825		-0.0325	1.5045	-1.6525	3.1565	0.3835	-3.6715	-3.6715			-1.3825		0.666	-0.3215	1.5045	-1.857	1.529
TCGA-E2-A158-01	2.1625	-0.2965	2.459	-1.778	-1.274	-2.381	-0.293	-2.238	-0.751	-2.7365	-0.9935	-1.581	-1.2385	-3.062	-2.555	-1.8	-2.4655	-2.238	-2.5655	-1.802	-1.456	-2.3675	-2.004	-1.7795	-1.5665	-0.103			-1.6735	3.92	4.112	-1.1245		-0.46	-1.492	-2.486	-2.7835	0.07067	-0.697	-0.697			-0.103		-1.506	-0.458	-0.0275	-0.249	0.367
TCGA-E2-A159-01	1.006	0.3725	0.6335	-0.1865	-0.949	-1.186	-0.1585	-1.227	-1.262	-1.7595	-0.9715	-0.565	-0.991	-0.9275	-0.7835	1.38283	-1.0835	-1.227	-1.5025	-1.356	-0.661	-0.01	-1.274	-0.4155	-1.4605	-1.4865			3.2345	6.0355	6.183	-0.501		2.7625	-1.6125	-0.6885	2.3475	3.9945	-1.689	-1.689			-1.4865		0.9135	2.8255	1.544	0.1385	1.078
TCGA-E2-A15A-01	0.2755	0.005	0.2705	-0.092	-1.3875	-0.8685	-0.82283	-1.684	-0.9055	-1.321	-0.8215	-1.9625	-0.8505	-1.429	-1.085	0.30683	-0.646	-1.684	-0.2165	-1.7105	-2.4165	-2.0195	-1.938	-1.332	-0.864	0.0555			5.021	5.988	6.683	0.233		2.214	-1.1215	-0.11	2.147	3.3145	-2.051	-2.051			0.0555		1.343	-0.47	1.634	-0.945	1.1045
TCGA-E2-A15C-01	2.16325	-0.04425	2.2075	-3.10075	-3.84625	-3.10725	-2.74025	-3.27075	-2.59575	-3.29925	-2.77725	-2.92825	-3.57525	-4.39475	-3.93825	-1.61892	-3.51475	-3.27075	-3.87675	-3.91125	-4.03425	-2.95475	-3.70425	-3.56225	-3.68625	-2.21475			5.99375	6.50125	7.58775	1.28925		-0.33725	0.02375	0.76325	1.96875	3.11008	-3.96125	-3.96125			-2.21475		0.09625	0.44425	4.04125	-1.46325	1.30225
TCGA-E2-A15D-01	2.0505	-0.0295	2.08	-0.884	-3.5685	-4.066	-4.63583	-3.975	-2.9455	-4	-3.136	-3.358	-3.736	-4.3205	-3.9755	-2.81317	-2.983	-3.975	-4.357	-2.8305	-3.8595	-3.2245	-4.111	-4.0495	-4.162	-3.176			5.092	6.5495	6.311	-0.04		-2.732	-1.9115	-1.437	3.2415	2.85417	-4.084	-4.084			-3.176		-1.0745	2.4575	3.1025	-3.4045	1.6625
TCGA-E2-A15E-01	2.1415	0.2295	1.912	-1.608	-2.7795	-1.599	-2.77117	-2.722	-2.181	-1.821	-2.1755	-2.399	-2.4405	-3.4885	-2.7945	-1.30617	-3.254	-2.722	-3.881	-4.4445	-2.8885	-1.138	-2.768	-2.27	-2.4725	-1.343			2.6545	6.2945	5.8715	-1.317		-1.177	-1.4715	-2.9175	0.449	2.4405	-4.298	-4.298			-1.343		-1.159	0.858	2.5705	-2.5495	1.2075
TCGA-E2-A15F-01	1.509	0.1125	1.3965	-1.1825	-2.128	-2.122	-1.2775	-2.176	-1.425	-0.8715	-1.007	-2.257	-1.4825	-2.46	-2.689	-0.61917	-1.92	-2.176	-1.817	-1.8605	-2.6245	-2.0635	-2.658	-2.1135	-1.1595	-0.771			3.178	6.2735	4.8605	-1.007		2.159	-0.484	-1.0965	1.476	2.67017	-2.311	-2.311			-0.771		-1.788	1.52	0.5915	-1.328	0.973
TCGA-E2-A15H-01	0.456	-0.5395	0.9955	-0.307	-1.677	-0.4355	-2.4985	-2.331	-1.8295	-0.7095	-1.653	-1.126	-2.5225	-2.84	-2.515	-0.58217	-2.1485	-2.331	-3.2635	-2.7735	-1.346	-1.6095	-2.671	-2.127	-1.742	-1.735			4.013	6.724	6.1005	1.725		0.058	-1.4765	-1.396	3.6295	2.2015	-2.2495	-2.2495			-1.735		0.8315	1.988	0.7195	-1.7755	2.5135
TCGA-E2-A15I-01	2.2165	-0.3255	2.542	-2.49	-3.781	-4.1305	-5.16333	-4.552	-4.549	-4.535	-3.5445	-3.5925	-3.7935	-5.0295	-4.43	-2.93633	-4.3225	-4.552	-4.738	-2.093	-4.579	-3.6705	-4.5765	-4.604	-3.8495	-2.847			3.234	5.979	4.0785	-0.467		1.0855	-2.5445	-3.2065	2.647	2.16867	-5.09	-5.09			-2.847		-0.6135	0.0135	1.3825	-2.2345	2.1925
TCGA-E2-A15J-01	2.1695	0.0605	2.109	-0.6075	-2.2655	-2.4965	-2.9355	-2.7285	-2.313	-2.584	-1.839	-2.221	-2.3585	-3.8195	-2.5745	-1.29517	-2.637	-2.7285	-3.471	-4.196	-3.293	-2.1785	-3.2655	-2.945	-2.959	-2.1295			3.5855	6.1705	6.747	0.3495		-2.989	0.024	0.0395	2.6545	2.0895	-2.907	-2.907			-2.1295		-1.056	3.515	2.35	-2.119	1.092
TCGA-E2-A15K-01	1.506	-0.022	1.528	0.8125	-1.0625	-1.167	-1.163	-1.0565	-0.9175	-1.0755	-0.933	-0.894	-1.0435	-2.362	-1.602	-0.09867	-1.0015	-1.0565	-2.417	-1.9385	-1.8145	-1.2455	-1.9435	-1.3205	-1.518	0.4055			5.2255	6.5645	6.056	-0.9365		2.779	-0.133	-1.0965	-0.034	3.248	-2.3305	-2.3305			0.4055		-0.06	4.8095	2.788	-1.0045	1.958
TCGA-E2-A15O-01	0.7935	-0.198	0.9915	-0.43	-1.7945	-1.084	-1.48633	-2.0605	-1.1325	-1.5875	-0.8315	-1.4525	-1.407	-2.087	-2.363	-0.38333	-1.721	-2.0605	-0.7565	-2.657	-1.4505	-1.5875	-2.154	-1.688	-0.834	-0.707			3.315	5.083	4.409	-0.849		2.327	-2.0825	-2.2785	1.53	1.55567	-2.7	-2.7			-0.707		1.549	2.907	1.069	-1.163	2.5015
TCGA-E2-A15P-01	0.9305	-0.9315	1.862	-1.9715	-3.328	-2.7665	-2.77217	-3.35	-2.064	-2.375	-2.244	-2.9325	-2.935	-2.775	-3.27	-1.93117	-2.381	-3.35	-1.901	-3.078	-2.6095	-2.5555	-3.2855	-3.085	-2.5525	-1.8525			1.6405	6.092	4.4605	-1.7715		-0.6305	-1.593	-3.51	-0.314	2.71817	-3.83	-3.83			-1.8525		0.826	2.1965	1.4295	-3.1655	2.464
TCGA-E2-A15R-01	0.053	-0.2805	0.3335	-0.4045	-1.8115	-1.574	-1.71817	-1.5315	-1.876	-2.018	-0.8295	-1.6865	-0.047	-1.704	-1.9775	0.05217	-1.4915	-1.5315	-1.7615	-3.0315	-1.0305	-2.3995	-2.6665	-2.725	-2.503	-0.225			0.0375	5.94	5.3075	-1.2465		1.793	0.4795	-1.4835	4.2975	2.85683	-2.234	-2.234			-0.225		0.1695	0.1885	1.243	-2.264	2.629
TCGA-E2-A15S-01	-0.7335	-0.1445	-0.589	-0.2685	-0.26	-0.2325	-0.49183	-0.2725	-0.2345	-1.074	-0.949	-0.5145	-0.0135	-0.7695	-0.133	1.56917	-1.21	-0.2725	-0.6225	-1.2915	-0.156	-0.92	-1.477	-1.772	-0.3655	0.049			-0.4135	4.831	-1.2875	-2.223		3.1965	-1.5895	-1.848	-0.8095	1.27283	-1.9775	-1.9775			0.049		1.5105	2.776	-0.622	-0.1275	2.0255
TCGA-E2-A15T-01	1.74075	0.14875	1.592	-0.18175	-1.86475	-0.05675	-1.68792	-1.90125	-0.77275	-0.15525	-1.23875	-1.67525	-1.55175	-1.58275	-0.11975	-0.19692	-1.83675	-1.90125	-1.53475	-2.68825	-1.50125	-1.21275	-1.53075	-1.90275	-1.17575	-0.64175			2.51225	4.74675	3.84125	-1.84125		2.46325	0.39925	-1.37575	1.02225	1.47742	-2.69275	-2.69275			-0.64175		0.63075	2.31675	1.71475	-1.52575	2.35275
TCGA-E2-A1AZ-01	1.8275	0.09	1.7375	0.7325	-0.978	-0.9625	0.31317	-1.002	-2.012	-1.2595	-0.297	0.0675	-0.957	-0.014	-1.231	-0.95783	-0.542	-1.002	-1.482	-1.479	-0.5455	0.2065	-2.2865	0.2315	-0.902	-0.3705			2.338	6.282	4.1595	0.2035		-0.0015	0.7355	-1.5505	-0.792	3.69583	-0.9195	-0.9195			-0.3705		-0.809	-1.131	2.372	1.135	0.646
TCGA-E2-A1B0-01	2.1705	0.464	1.7065	0.2775	-0.8825	-2.695	-1.81233	-1.876	-1.534	-1.949	-1.1465	-1.0065	-1.1115	-3.2915	-1.4815	-0.09733	-2.4495	-1.876	-2.4035	-2.262	-1.5535	-1.393	-1.9835	-1.719	0.027	-0.809			4.388	6.906	6.275	0.9975		0.0285	0.32	-0.197	0.347	3.159	-1.277	-1.277			-0.809		-0.0475	3.4225	4.29	-1.1085	1.228
TCGA-E2-A1B1-01	2.8885	-1.2235	4.112	-2.377	-3.0165	-1.881	-2.79317	-2.879	-1.5125	-1.5365	-2.4555	-3.0845	-2.889	-3.3005	-1.377	-1.9365	-3.338	-2.879	-3.1285	-4.0455	-2.5365	-2.5465	-2.8835	-3.117	-2.3185	-1.407			5.373	5.981	6.0755	0.178		-1.1365	-1.704	-2.3445	-0.1635	3.2275	-2.541	-2.541			-1.407		0.716	4.7355	1.879	-1.0245	0.6545
TCGA-E2-A1B4-01	1.4165	0.1585	1.258	-3.3495	-4.298	-3.7215	-4.125	-4.1345	-3.1805	-4.402	-3.5465	-3.307	-3.2855	-4.5755	-4.5645	-0.85933	-3.8295	-4.1345	-3.801	-4.253	-4.887	-2.8475	-4.8625	-4.764	-3.6975	-2.3925			3.4545	6.4905	6.312	-0.9795		-0.9265	0.1335	-1.5085	0.475	3.21533	-5.4355	-5.4355			-2.3925		0.0045	-0.367	3.9055	-1.624	1.8595
TCGA-E2-A1B6-01	3.038	-0.259	3.297	-2.3775	-2.7975	-3.755	-2.94717	-3.241	-2.655	-3.082	-2.8325	-2.719	-3.427	-4.0965	-3.03	-1.2825	-3.0925	-3.241	-3.4535	-4.266	-3.71	-2.304	-3.566	-3.3405	-2.3715	-0.8175			-1.136	6.2965	2.048	-1.759		-0.19	-1.6715	-2.8685	0.985	2.35517	-3.296	-3.296			-0.8175		-1.039	4.6375	0.1895	-2.7215	2.389
TCGA-E2-A1BD-01	0.158	-0.007	0.165	0.0365	-1.217	-1.6865	-3.26517	-2.62	-2.416	-2.262	-1.8615	-1.811	-2.4965	-2.3945	-3.1075	-1.9625	-2.625	-2.62	-2.6725	-3.7225	-2.2235	-1.485	-3.1615	-3.2105	-2.1395	-1.1795			2.988	6.69	5.0745	-1.1975		0.0745	0.268	-3.0975	0.2285	2.58217	-2.9395	-2.9395			-1.1795		0.21	0.0315	0.861	-2.0985	0.7545
TCGA-A2-A0YI-01	1.603	-0.001	1.604	-3.479	-2.0075	-3.9235	-4.42767	-4.5845	-3.4445	-3.9895	-3.3665	-3.7395	-3.7555	-5.188	-3.8025	-3.32967	-3.493	-4.5845	-3.177	-5.406	-3.274	-3.7965	-4.3095	-4.1645	-3.224	-2.4605			2.2635	6.7435	4.8075	-0.2285		0.5635	-2.0535	-3.6295	-2.8435	2.13267	-4.625	-4.625			-2.4605		1.5045	6.4005	1.3725	-2.4615	1.812
TCGA-A8-A08J-01	0.212	-0.459	0.671	-1.169	-2.369	-2.5835	-2.08267	-2.121	-1.5955	0.8025	-1.7215	-1.857	-3.111	-3.305	-0.728	1.03133	-2.2775	-2.121	-0.9765	-2.7385	-2.9255	-1.6495	-2.5855	-1.9085	-1.7865	-1.258			7.6515	7.972	7.665	1.2435		-0.0425	-0.7045	0.84	4.153	2.916	-1.291	-1.291			-1.258		0.7215	6.559	-0.1565	-1.153	2.543
TCGA-AO-A03O-01	0.6965	-0.0805	0.777	-0.1985	-1.137	-0.9685	-1.62333	-1.66	-1.291	-1.752	-1.409	-1.5425	-1.9255	-2.865	-1.505	0.04067	-2.1715	-1.66	-0.366	-1.7365	-0.851	-0.9495	-2.719	-1.43	-1.351	0.3445			1.238	5.938	4.513	-0.776		0.5055	-1.2085	-2.931	-0.4965	1.87467	-2.048	-2.048			0.3445		1.3355	3.73	1.673	-0.6135	2.008
TCGA-AO-A03R-01	2.4735	-0.1615	2.635	1.1675	-0.7055	-0.078	-1.64117	-0.805	-0.5895	-1.45	0.111	-0.39	-0.6615	-1.504	-2.526	1.19883	-1.72	-0.805	-0.6895	-1.295	0.1495	-0.199	-1.443	-1.56	-1.825	0.6695			1.0115	3.246	1.877	-1.1865		2.6385	-2.688	-4.014	1.108	0.95117	-2.0795	-2.0795			0.6695		0.7985	0.09	2.9515	-0.411	2.3965
TCGA-AO-A03T-01	2.365	-0.828	3.193	0.2545	-1.8015	-1.352	-2.236	-1.37	-0.4715	-2.5635	-1.215	-2.577	-2.3295	-2.4635	-2.471	0.19733	-1.7325	-1.37	-1.153	-1.6715	-0.741	-1.0145	-2.701	-2.4155	-2.1035	0.0935			-0.118	5.9935	2.2715	-0.83		0.909	-1.8955	-3.335	-0.0695	1.40833	-2.212	-2.212			0.0935		0.455	3.0965	2.294	-2.2045	2.6515
TCGA-AO-A0J2-01	1.3555	-0.6155	1.971	1.11	-1.16	-0.6915	-0.58267	-1.265	-0.237	-0.596	-0.0745	-0.867	-0.977	-1.99	-0.6405	1.22667	-1.1255	-1.265	-0.138	-1.153	-1.5905	-0.3185	-1.354	-0.4345	-1.205	0.2865			1.9625	6.497	6.752	0.1625		2.94	-1.0065	-2.3215	1.8715	0.833	-1.0535	-1.0535			0.2865		-0.8125	1.2125	2.426	-0.019	1.4685
TCGA-AO-A0J3-01	-0.14	-0.191	0.051	-0.9665	-1.101	-1.678	-1.226	-2.3555	-0.6945	-2.1225	-0.088	-1.436	-1.45	-2.808	-2.8285	-0.18967	-2.5875	-2.3555	-0.9435	-1.72	-2.7345	-1.737	-1.692	-2.5775	-2.0835	0.6905			-0.689	4.8965	3.4025	-1.8955		1.729	-1.465	-0.676	3.0985	0.507	-2.165	-2.165			0.6905		-0.8175	-0.488	-0.6125	-1.3165	2.603
TCGA-AO-A0J4-01	1.1635	-0.2955	1.459	-0.1705	-0.2875	-1.53	-0.20033	-1.2315	0.083	-1.893	-1.0715	-0.452	-1.7085	-2.0235	-2.2595	-0.21767	-2.0705	-1.2315	0.445	-1.8415	-1.1985	-1.3595	-0.6795	-1.144	-1.206	-1.3145			3.411	7.446	5.4805	0.517		1.346	-1.0665	-0.753	-3.8615	1.21967	-0.744	-0.744			-1.3145		1.026	-0.9035	4.1245	1.194	0.98
TCGA-AO-A0J6-01	0.5905	-0.068	0.6585	-0.368	-0.2915	-1.079	0.36883	-0.308	-1.455	-1.0405	0.0855	-0.7525	-0.8685	-1.864	-1.2185	-2.00283	-1.5355	-0.308	-0.2305	-1.9775	-0.942	-0.26	-2.0805	-0.2595	-0.2225	-0.698			4.723	5.206	4.826	0.559		1.715	-1.941	-4.4045	-2.535	1.6535	-0.973	-0.973			-0.698		-0.097	2.123	1.7255	-0.3445	0.103
TCGA-AO-A0J7-01	1.9895	-0.1045	2.094	-0.0705	-1.3545	-0.615	-1.46633	-2.124	-1.212	-0.593	-1.447	-1.4345	-2.4325	-1.2345	-0.692	-0.314	0.1355	-2.124	-0.3755	-1.6205	-2.2345	-1.562	-2.648	-2.131	-2.1095	-1.224			1.7565	7.627	6.825	-0.0145		3.853	-1.0465	-2.2315	-2.6805	1.92533	-2.1525	-2.1525			-1.224		0.467	5.5135	0.53	-1.6525	2.312
TCGA-AO-A0JB-01	1.405	-0.514	1.919	-0.723	-2.1215	-2.1075	-2.55517	-1.652	-0.557	-2.4095	-2.238	-0.5595	-4.0745	-4.4005	-3.9555	0.04383	-3.3155	-1.652	-2.3215	-2.4445	-1.5105	-1.71	-3.1665	-2.826	-2.2925	-2.105			-3.7705	7.537	2.772	0.489		-1.892	-1.523	-4.312	-1.4925	0.4175	-2.763	-2.763			-2.105		0.1725	-0.051	1.7045	-1.5885	2.001
TCGA-AO-A0JC-01	2.6505	-0.2155	2.866	-2.1135	-2.611	-2.134	-2.77317	-2.2005	-2.7505	-3.087	-1.778	-1.7775	-2.409	-3.659	-3.289	-1.44983	-2.6235	-2.2005	-1.542	-3.391	-2.0375	-2.194	-3.089	-2.9755	-1.776	-2.246			-2.429	1.1775	-1.922	-1.886		-1.142	-2.068	-2.046	1.066	-0.40383	-2.546	-2.546			-2.246		2.019	-0.9075	-1.07	-1.7745	-0.0885
TCGA-AO-A0JD-01	1.3165	0.6465	0.67	1.441	-0.977	-1.1955	-1.3045	-0.8615	-0.1075	-1.0385	-1.4525	-1.231	-0.845	-0.8275	-1.27	0.17817	0.4215	-0.8615	-0.4535	-1.3505	-0.5645	0.2415	-1.591	-1.047	-0.3085	0.2465			5.291	5.0115	2.2385	-0.95		-1.8895	-0.9615	-5.2815	1.1925	0.9505	-1.852	-1.852			0.2465		2.143	0.132	0.357	-1.1785	2.747
TCGA-AO-A0JE-01	0.787	-0.349	1.136	-1.403	-1.9855	-3.1865	-2.20033	-2.6625	-1.752	-2.268	-2.1795	-1.606	-1.718	-3.5635	-2.362	-0.973	-1.659	-2.6625	-2.201	-3.269	-2.3555	-2.045	-3.371	-0.798	0.113	-1.5905			6.3975	7.85	8.6755	1.465		-2.218	1.0815	0.9215	-2.5305	4.16933	-2.8245	-2.8245			-1.5905		-0.055	-0.0805	2.986	-1.4425	2.3965
TCGA-AO-A0JF-01	2.0355	-0.071	2.1065	-2.241	-3.5285	-3.226	-3.67383	-3.7105	-2.7315	-3.174	-3.5075	-3.0645	-3.4815	-3.5075	-2.277	-2.12883	-2.1805	-3.7105	-1.862	-4.674	-3.07	-2.8355	-3.507	-3.969	-3.1845	-1.7145			5.169	7.4785	6.92	0.0255		0.0285	0.4385	-1.588	-0.0775	3.4695	-4.2705	-4.2705			-1.7145		0.113	2.679	2.9385	-2.266	1.469
TCGA-AO-A0JG-01	2.388	0.154	2.234	-3.7305	-3.9585	-4.3615	-4.38283	-4.086	-3.0325	-4.5385	-2.881	-3.2345	-3.8715	-4.712	-4.0765	-2.3625	-4.0135	-4.086	-2.768	-4.508	-3.8985	-3.7675	-4.4385	-4.314	-3.5755	-2.359			-0.068	7.001	4.265	-1.224		-1.6	1.136	-4.63	0.614	2.23983	-4.187	-4.187			-2.359		-0.7815	1.358	-0.4115	-2.6815	2.5735
TCGA-AO-A0JL-01	1.2595	-0.717	1.9765	0.955	0.1035	0.867	-1.09767	-1.5935	-1.0885	-1.163	-0.375	-1.533	-1.702	-2.8875	-4.1875	0.66267	-2.7935	-1.5935	-0.7795	-2.026	-1.4005	0.2155	-2.077	-1.5805	-0.354	-1.345			-2.1495	6.213	4.9675	0.195		0.474	1.3875	-1.982	0.647	0.296	-0.4365	-0.4365			-1.345		-0.9935	-2.0865	2.8675	-1.182	0.9035
TCGA-AO-A0JM-01	2.099	-0.2065	2.3055	-0.363	-1.1405	1.0035	-1.5455	-2.116	-0.7665	0.4295	-0.971	-0.1655	-2.604	-0.465	-1.8035	0.10683	0.31	-2.116	0.085	-2.233	-0.7725	-0.657	-1.54	-0.754	-0.873	-0.3785			6.454	7.732	7.7185	1.418		-0.0925	-1.2275	-0.722	-2.294	3.07283	-2.9665	-2.9665			-0.3785		1.8435	4.2365	2.204	1.1565	2.692
TCGA-D8-A13Y-01	-0.588	-0.159	-0.429	0.7955	-0.312	-1.126	0.6585	-0.388	2.0535	-0.87	-0.9515	-0.7865	-0.18	-0.2485	1.061	3.16183	0.294	-0.388	-1.0915	0.0805	1.117	-0.0765	-0.2855	-0.28	-1.348	0.6295			-1.656	6.6865	6.639	-1.5185		5.231	-0.64	-1.1685	3.802	1.6205	-0.5695	-0.5695			0.6295		-0.0595	-0.0695	3.352	1.753	1.331
TCGA-A7-A0CD-01	0.856	0.0605	0.7955	-1.0835	-3.0405	-1.4765	-3.0025	-2.5675	-1.759	-1.584	-2.148	-2.722	-2.2375	-2.22	-2.152	-2.05583	-1.3475	-2.5675	-1.1855	-2.4145	-1.661	-2.1085	-3.112	-2.821	-2.8855	-1.156			0.6115	7.0395	5.19	-0.605		1.893	-0.5615	-2.75	-1.567	1.86217	-3.163	-3.163			-1.156		0.92	4.69	2.3755	-2.2775	1.792
TCGA-A7-A0CE-01	0.17325	0.22225	-0.049	0.32825	-0.77325	-0.41475	-1.60775	-1.08775	-0.71925	-1.11325	-0.34575	-0.59275	-1.62025	-1.29225	-1.21225	0.10892	-1.13025	-1.08775	-0.41575	-1.43525	-0.28425	-0.35725	-2.65175	-0.55175	-1.08025	-0.69975			0.57725	5.51425	4.59775	-0.06725		-0.10975	-1.17275	-0.46975	-3.18475	0.84625	-1.79925	-1.79925			-0.69975		0.65175	-0.47675	3.35625	-1.02975	1.33275
TCGA-A7-A0CH-01	1.3805	-0.27	1.6505	-1.4505	-2.6705	-2.829	-3.49683	-3.1375	-2.256	-2.8435	-2.477	-2.662	-3.427	-3.289	-2.9415	-1.92317	-2.1365	-3.1375	-2.535	-3.28	-3.321	-2.6575	-3.685	-3.538	-3.33	-2.142			5.175	7.879	7.7855	0.5685		1.512	-1.3805	-0.5405	0.8495	3.46617	-3.035	-3.035			-2.142		0.6245	2.9515	3.086	-2.6655	1.77
TCGA-A7-A0D9-01	0.6165	0.029	0.5875	-3.363	-4.108	-3.8895	-3.90783	-4.336	-3.113	-4.0345	-2.73	-3.4	-3.6445	-4.5485	-3.124	-2.1415	-4.0455	-4.336	-2.4425	-4.3795	-2.6985	-3.3825	-4.16	-4.138	-3.528	-2.186			3.9915	6.916	6.1825	0.2975		-1.446	-0.95	-1.397	0.0075	2.4445	-5.0835	-5.0835			-2.186		2.804	-0.662	-1.676	-2.058	2.6045
TCGA-A7-A0DB-01	0.9635	-0.2215	1.185	-1.1795	-3.46	-2.9645	-3.283	-3.0115	-2.5275	-3.0275	-2.7035	-1.753	-3.437	-3.509	-1.934	-1.84067	-1.8635	-3.0115	-1.6225	-2.977	-1.9635	-2.0625	-3.1905	-3.1485	-2.872	-2.204			3.5125	7.4605	6.5815	0.118		0.2245	-2.499	-2.454	-1.0095	2.45967	-3.9975	-3.9975			-2.204		0.168	2.6225	0.969	-2.6705	2.252
TCGA-AO-A03P-01	0.128	0.141	-0.013	-1.126	-1.6345	-0.956	-1.85833	-2.1145	-1.489	-1.4005	-1.344	-2.4435	-2.548	-3.345	-2.403	-0.79067	-2.838	-2.1145	-1.5215	-2.015	-2.7395	-1.764	-2.53	-1.7755	-1.6685	-1.246			1.4965	7.354	6.107	-0.357		1.4125	0.5335	-1.811	0.0115	1.465	-1.842	-1.842			-1.246		-0.026	1.7185	1.4825	-1.2295	2.208
TCGA-AO-A0JA-01	1.6335	0.033	1.6005	-0.8745	-2.0875	-1.973	-1.9915	-2.514	-0.564	-2.8705	-1.9495	-2.1355	-3.0835	-1.7195	-1.3475	-1.60483	-0.188	-2.514	-1.4375	-2.9095	-3.222	-1.149	-2.244	-1.893	-1.539	-1.068			3.246	7.4735	7.5185	1.2005		-0.152	-0.929	-0.9435	2.249	3.38483	-2.5465	-2.5465			-1.068		0.288	0.64	1.3145	-2.0715	1.909
TCGA-AQ-A04J-01	1.5785	0.235	1.3435	-0.5095	-1.675	-1.529	-1.275	-1.443	-1.133	-1.781	-0.3875	-1.2295	-0.9535	-1.593	-1.9735	0.55467	-0.834	-1.443	-0.1775	-2.534	0.2615	-1.0665	-1.6335	-1.0765	-0.937	-0.842			0.0225	6.562	4.7785	-0.331		1.1095	-0.2155	-0.7855	-2.1715	2.60333	-1.7055	-1.7055			-0.842		0.664	-0.245	3.731	-1.121	0.974
TCGA-B6-A0I2-01	1.008	0.11	0.898	-0.281	-1.616	-1.8935	0.17717	-1.659	-1.838	-1.426	-1.511	-1.3465	-0.5005	-3.37	-2.5555	-0.61117	-1.8955	-1.659	-0.916	-2.081	-0.8075	-0.937	-2.841	-1.7555	-1.2375	-0.8815			-1.624	3.864	3.826	-1.22		-1.937	-0.552	-3.9525	-3.136	2.1565	-1.1335	-1.1335			-0.8815		-0.1455	0.4715	0.7315	-2.111	0.1385
TCGA-B6-A0I9-01	1.29	-0.2945	1.5845	0.384	-0.089	-1.2825	-1.25983	-1.2425	-0.661	-2.043	-0.447	-1.223	-0.426	-1.626	-2.6045	0.49917	-0.5285	-1.2425	-1.046	-1.3155	-5.306	-1.4575	-1.765	-1.3825	0.396	-1.1985			2.568	7.167	5.928	-0.388		0.5395	0.823	-2.4965	-3.0835	2.49817	-1.317	-1.317			-1.1985		0.7805	2.821	1.28	-1.2665	2.5405
TCGA-B6-A0IB-01	0.2635	0.054	0.2095	0.608	-1.198	-1.6925	-1.19717	-2.3965	-1.9195	-2.1655	-1.807	-1.652	-1.3885	-1.0645	-3.0705	-0.1075	0.411	-2.3965	-0.51	-2.1845	-1.2985	-1.5935	-3.186	-1.715	-2.1095	-0.709			2.0345	7.5765	5.6725	-0.806		1.263	-0.9695	-3.959	3.7575	1.93783	-2.013	-2.013			-0.709		1.141	0.76	0.61	0.041	2.636
TCGA-B6-A0IG-01	2.162	0.1615	2.0005	-1.4915	-2.07	-0.693	-1.8525	-2.5515	-1.0095	3.5725	-1.6275	-1.33	-2.1255	-2.73	-2.584	-0.53483	-1.24	-2.5515	-1.815	-3.766	-2.398	-1.189	-2.0275	-0.9105	-0.938	0.4675			3.162	7.0515	4.884	0.443		-0.0745	0.4815	-3.977	3.2345	2.07017	-2.2125	-2.2125			0.4675		1.5155	5.9925	1.4195	-0.04	1.934
TCGA-B6-A0IJ-01	1.7745	-0.0025	1.777	1.091	0.4295	-0.5435	0.6995	0.0905	-0.333	-0.731	0.6165	0.1785	-1.016	-1.8485	-1.563	0.54417	-1.214	0.0905	1.3575	-0.6945	-1.7595	-0.5975	-0.8295	0.038	-1.013	0.32			1.9155	4.525	2.9385	0.441		2.4115	-0.6045	-2.522	-1.434	1.1305	-0.2515	-0.2515			0.32		-0.14	-0.5545	2.158	1.1045	0.171
TCGA-B6-A0IO-01	2.4045	0.1565	2.248	-0.892	-1.5775	-1.904	-1.913	-2.081	-1.5095	-2.0505	-1.532	-2.3765	-2.7565	-2.9285	-2.3845	-0.903	-1.8895	-2.081	-2.1375	-2.515	-2.5605	-1.5315	-2.524	-2.551	-1.782	-1.157			1.85	7.255	4.993	-0.7185		1.0605	-1.516	-3.589	-0.5595	1.58767	-2.944	-2.944			-1.157		1.348	6.121	1.653	-0.7085	1.5375
TCGA-B6-A0IQ-01	1.5925	0.3695	1.223	0.803	1.088	-0.098	-0.1495	-0.263	-0.639	-1.4345	0.078	-0.113	-0.517	-2.165	-2.2275	0.0725	-0.872	-0.263	0.6555	-0.289	-0.434	0.5635	-1.013	-0.0315	-1.538	-0.4375			-0.3075	5.5935	3.186	-1.179		1.6075	0.998	-1.2705	-0.5305	-0.25517	-0.0605	-0.0605			-0.4375		-0.0535	-0.894	2.7775	2.832	-0.729
TCGA-D8-A140-01	1.3635	0.0705	1.293	-1.1415	-1.7405	-0.7965	-1.84283	-2.26	-1.8535	-0.946	-1.8235	-1.9765	-1.203	-2.69	-2.8605	-0.34183	-2.64	-2.26	-1.492	-3.5605	-0.8585	-2.1675	-2.0845	-2.4745	-2.402	-0.8565			0.756	5.849	4.824	-1.222		1.144	-1.8485	-2.251	-3.428	2.71483	-2.941	-2.941			-0.8565		-0.03	0.696	0.1505	-2.181	2.292
TCGA-D8-A142-01	1.064	-0.169	1.233	-0.8675	-0.5685	-1.9655	-1.03483	-1.7075	-1.784	-1.196	-1.4765	-1.977	-2.1635	-2.358	-1.6685	-0.2745	-1.9915	-1.7075	-1.2875	-2.691	-1.814	-1.8275	-2.7155	-0.28	-1.138	-0.926			5.021	6.864	7.9775	1.1465		-1.5565	0.6045	1.252	-3.22	3.58617	-2.256	-2.256			-0.926		1.587	2.381	2.368	-0.795	0.492
TCGA-D8-A143-01	0.5425	0.561	-0.0185	0.951	0.081	0.115	1.04367	0.163	-1.1165	-0.175	-1.712	-0.1335	0.193	-1.647	0.8845	1.71433	-0.535	0.163	-1.482	0.367	0.3065	-0.812	-0.839	-0.725	0.1465	-0.787			1.9445	5.5185	4.4905	-1.342		2.317	0.294	-1.5835	4.046	2.04167	-0.319	-0.319			-0.787		1.0265	-0.053	1.677	0.1275	1.609
TCGA-D8-A145-01	2.412	0.0405	2.3715	-2.815	-3.506	-3.6515	-4.57467	-3.9645	-3.4045	-4.106	-3.3175	-3.1555	-3.3115	-4.334	-4.017	-2.90033	-3.484	-3.9645	-4.19	-4.3405	-3.0435	-3.592	-3.544	-4.189	-3.499	-2.142			1.6455	6.575	3.8535	-1.674		-2.18	-2.371	-2.9235	-1.4235	3.96667	-4.502	-4.502			-2.142		0.6	2.59	1.993	-3.776	2.19
TCGA-A2-A0SW-01	1.3225	-0.0495	1.372	0.001	-1.109	-2.454	-1.43517	-1.7135	-1.8385	-2.1165	-1.138	-1.335	-1.5535	-0.7005	-0.6685	-0.03217	0.026	-1.7135	-0.3655	-1.832	-1.194	-0.735	-2.175	-1.0715	-0.2005	-1.101			3.033	7.025	6.988	0.286		-2.4805	-1.6455	0.633	-1.5975	1.40117	-2.6115	-2.6115			-1.101		0.18	4.054	1.161	-0.476	1.32
TCGA-A2-A0SX-01	2.652	0.457	2.195	0.496	-0.4175	-1.3235	-0.68283	-0.7705	-1.114	-1.7375	-1.245	-1.176	-1.4365	-3.7355	-0.6015	-0.19483	-1.9775	-0.7705	0.0885	-1.0495	-0.8335	-0.707	-1.692	-2.2745	-1.421	0.0205			4.4395	6.764	6.7115	-0.075		0.903	-2.611	0.0235	0.3035	2.74983	-0.9445	-0.9445			0.0205		-0.0625	0.382	-0.755	-1.552	0.0075
TCGA-A2-A0T2-01	1.384	-0.4515	1.8355	-2.321	-2.4935	-3.443	-2.03033	-2.5235	-1.865	-2.5985	-2.266	-1.7235	-1.459	-2.447	-3.651	-1.16333	-1.979	-2.5235	-2.4065	-3.4105	-0.97	-1.7435	-2.359	-1.6115	-2.0225	-2.4615			-0.1195	6.5395	5.2975	0.451		-1.2045	0.2575	-3.5075	2.628	1.25967	-3.113	-3.113			-2.4615		0.8345	0.0965	3.6265	-0.6705	2.377
TCGA-AQ-A04H-01	0.718	0.028	0.69	-0.2575	-1.3485	-0.218	-1.32783	-1.695	-1.1905	-0.962	-1.4805	-2.2375	-1.6135	-1.1375	-1.149	-0.72383	-1.1285	-1.695	0.2265	-2.385	-1.4165	-1.5215	-2.315	-1.97	-1.8495	0.14			3.6655	5.6565	4.899	-0.3905		-3.071	-0.215	-1.9635	-0.286	1.89083	-3.408	-3.408			0.14		2.0955	-0.7825	-1.4475	-1.7295	2.5545
TCGA-AQ-A04L-01	1.876	-0.545	2.421	-2.1215	-3.007	-3.3125	-2.946	-4.083	-2.355	-2.8285	-2.938	-2.546	-2.3205	-4.229	-2.7895	-0.70833	-4.1895	-4.083	-2.1885	-3.8685	-2.018	-3.241	-3.29	-2.992	-2.9695	-1.717			3.7955	8.244	8.2995	0.763		1.3515	-0.0715	1.416	1.4785	2.55533	-3.311	-3.311			-1.717		0.35	0.1515	3.193	-0.9455	0.9825
TCGA-B6-A0I6-01	2.1285	-0.19	2.3185	-0.032	-1.421	-1.673	-1.16967	-0.291	-0.4155	-1.6255	-0.341	-0.866	-0.2125	-1.938	-2.7535	0.92167	-1.0485	-0.291	-0.722	0.8325	-0.664	-1.4065	-1.9255	-0.6	-1.369	0.1495			4.3095	7.4745	7.0475	1.066		2.369	-0.7775	1.1005	-3.9615	1.99533	-0.121	-0.121			0.1495		-0.5795	-1.002	4.1185	0.731	0.949
TCGA-BH-A0BJ-01	1.855	0.2155	1.6395	-1.3245	-2.9845	-2.6725	-3.47267	-3.6645	-2.3055	-3.0035	-3.1045	-2.9105	-2.761	-3.4795	-2.2545	-1.917	-2.0935	-3.6645	-2.5505	-4.358	-3.078	-2.307	-3.6555	-3.5035	-2.641	-2.45			3.4235	7.5885	5.231	0.232		2.282	-0.0965	-4.1205	0.5255	2.62833	-3.416	-3.416			-2.45		-0.1375	-0.364	3.251	-1.8645	2.5695
TCGA-BH-A0BV-01	2.257	-0.0605	2.3175	-0.576	-1.9105	-1.682	-3.21267	-3.475	-1.9645	-2.707	-2.112	-2.416	-2.5335	-3.4185	-3.0305	-2.32267	-2.768	-3.475	-3.265	-3.61	-2.4455	-2.194	-3.053	-3.214	-1.9985	-1.273			2.7695	6.9995	6.775	0.449		2.008	-0.762	-1.321	2.4955	1.98367	-3.2265	-3.2265			-1.273		0.7115	5.009	0.2085	-1.98	2.0435
TCGA-BH-A0C0-01	1.178	0.1615	1.0165	-0.4395	-1.4395	-1.1895	-0.92317	-2.309	-1.216	-0.9745	-0.9245	-1.1425	-1.244	-3.368	-1.543	0.09683	-2.0055	-2.309	-0.224	-3.0605	-1.41	-1.575	-1.949	-1.577	-2.156	-0.889			3.1165	6.0955	4.385	0.5645		0.785	-3.224	-2.31	-3.219	1.2375	-2.6445	-2.6445			-0.889		1.13	-0.669	3.2255	-1.988	1.3575
TCGA-BH-A0DH-01	0.4715	-0.182	0.6535	-1.0745	-3.0435	-1.9665	-2.347	-3.021	-1.9	-1.916	-2.1495	-1.418	-2.091	-1.971	-2.211	-1.10133	-1.0365	-3.021	-1.0475	-4.3885	-1.0775	-2.286	-2.77	-2.2465	-2.2975	-0.5555			2.913	7.0685	5.2105	-0.3085		2.3305	-1.495	-1.775	-0.792	1.52333	-4.5185	-4.5185			-0.5555		0.444	4.4985	1.2445	-0.8495	3.1115
TCGA-BH-A0DK-01	2.9555	0.1835	2.772	-0.211	-1.618	-2.291	-1.79933	-2.2725	-1.641	-2.559	-1.3935	-1.131	-2.701	-2.242	-1.524	-1.30433	-0.8715	-2.2725	-1.297	-2.65	-1.681	-1.8035	-2.269	-2.2645	-1.9005	-0.3475			4.0915	7.303	6.0775	0.3815		-1.198	0.372	-2.425	0.361	3.32767	-2.5335	-2.5335			-0.3475		1.2405	5.6325	0.476	-1.203	2.9025
TCGA-BH-A0DQ-01	1.8215	0.0795	1.742	-0.553	-1.992	-1.794	-2.69767	-3.5155	-1.607	-1.9465	-1.859	-2.0695	-2.116	-2.687	-2.419	-1.173	-1.561	-3.5155	-1.892	-2.9155	-0.7095	-2.087	-2.592	-2.6585	-2.5435	-0.97			3.1225	7.9265	7.3835	0.863		0.851	-0.4505	-0.1945	-0.7145	3.64067	-3.5435	-3.5435			-0.97		0.559	1.9155	1.5545	-2.3265	2.863
TCGA-BH-A0DS-01	2.339	-0.038	2.377	-0.682	-1.796	-2.3915	-3.38533	-3.583	-1.901	-2.6915	-2.508	-2.342	-2.745	-1.9665	-2.3375	-0.94333	-0.1215	-3.583	-1.9715	-3.417	-2.4245	-2.0775	-3.0985	-3.298	-2.116	-1.297			-0.065	7.1985	3.7935	-1.16		-0.3295	0.144	-3.626	1.0925	1.959	-2.788	-2.788			-1.297		-0.157	5.553	2.726	-2.164	2.3715
TCGA-BH-A0E0-01	1.2245	-0.083	1.3075	-0.674	0.241	-1.4925	-0.289	-1.5125	-1.513	-1.8855	-0.6865	-0.137	-0.9785	-2.2175	-1.3875	0.09467	-0.9525	-1.5125	-1.048	-1.418	-0.3105	-0.396	-2.172	-1.643	-2.0225	-0.9945			-0.8785	5.264	3.801	-1.523		0.2815	-0.797	-4.1205	1.6025	0.786	-1.637	-1.637			-0.9945		1.429	-1.0735	4.39	0.1135	0.9195
TCGA-BH-A0E1-01	1.7345	-0.2585	1.993	1.027	-0.928	-1.273	-1.53883	-1.804	-0.6055	-1.8595	-1.348	-1.04	-1.715	-0.9985	-0.9915	-0.40883	-0.3835	-1.804	-0.495	-2.1755	-0.2505	-1.3365	-2.057	-1.7955	-1.823	-0.476			1.438	7.0635	4.7445	-0.547		2.5595	-1.227	-3.3075	0.2645	2.25617	-1.688	-1.688			-0.476		1.4215	5.1495	-0.936	-1.2555	2.4395
TCGA-BH-A0E2-01	1.63	-0.069	1.699	0.0875	-1.7335	-1.7925	-1.6765	-1.031	-0.902	-1.995	-1.427	-1.029	-1.5895	-2.4955	-3.21	-1.41583	-2.1445	-1.031	-0.5075	-0.0855	-1.9765	-0.879	-2.096	-2.617	-1.9595	-1.171			6.0795	7.4445	7.1505	0.7455		2.8595	-1.2465	-0.2905	2.9425	2.41017	-1.1635	-1.1635			-1.171		0.9895	0.726	0.1715	-0.587	3.0865
TCGA-BH-A0E6-01	-0.115	-0.176	0.061	0.7685	-0.9155	-1.7035	-0.8815	-0.809	-0.616	-1.536	-1.4305	0.455	-1.7705	-2.0855	-3.6645	0.2595	-1.9795	-0.809	-0.242	-1.2685	0.3205	-1.106	-2.2075	-0.4225	-2.2935	-0.4075			0.2205	7.0975	5.8515	-0.2395		-2.454	-1.6295	-1.0665	4.4775	2.02717	-0.701	-0.701			-0.4075		2.104	-1.0895	4.508	0.4075	2.165
TCGA-BH-A0E7-01	0.531	-0.206	0.737	-2.6045	-4.1295	-2.9125	-2.824	-3.613	-2.3685	-3.483	-2.5	-3.0065	-3.639	-3.9325	-3.538	-2.288	-3.484	-3.613	-2.429	-4.094	-3.092	-2.925	-3.7465	-3.693	-2.1765	-1.678			5.0375	7.291	7.0205	0.1435		0.505	-0.2505	-0.9935	-3.935	2.037	-3.9275	-3.9275			-1.678		0.7795	1.058	1.8315	-2.381	2.655
TCGA-BH-A0EB-01	1.095	-0.276	1.371	-1.9005	-3.8465	-3.032	-3.5785	-3.5445	-2.8245	-3.3255	-3.071	-2.6065	-3.8315	-4.0585	-3.3905	-1.67483	-2.6895	-3.5445	-1.7925	-4.076	-3.1845	-2.575	-3.962	-3.608	-2.3725	-3.088			3.777	7.9345	7.082	0.6725		1.4995	-0.8305	-0.8605	0.7765	2.8995	-3.979	-3.979			-3.088		2.458	3.523	2.1025	-2.072	3.0235
TCGA-BH-A0EE-01	1.5385	-0.3205	1.859	0.0795	-1.3795	0.979	-1.06283	-0.4255	-1.072	1.6465	-0.9795	-1.425	-1.585	-2.6845	-3.002	1.23983	-1.651	-0.4255	-0.871	-1.462	0.0105	-1.063	-1.4355	-1.235	-0.8385	-0.621			4.1275	3.2385	3.129	-2.1425		-0.467	-1.1395	-4.96	3.863	0.75683	-1.458	-1.458			-0.621		2.194	5.707	2.766	0.006	4.283
TCGA-BH-A0GY-01	1.52	-0.198	1.718	-0.679	-2.666	-2.517	-1.96667	-2.7095	-1.667	-2.4315	-2.2285	-2.557	-1.8615	-3.438	-2.2205	-0.10833	-1.5905	-2.7095	-2.3185	-1.299	-1.1585	-2.3745	-3.083	-2.2175	-1.262	-1.217			6.1605	7.436	6.1685	0.748		3.0355	-1.3695	-1.0425	1.3555	2.63367	-3.002	-3.002			-1.217		2.113	0.773	3.0715	-1.3115	2.7955
TCGA-BH-A0GZ-01	1.539	0.6345	0.9045	-0.477	-1.9885	-2.1715	-2.95267	-2.2025	-2.156	-2.076	-2.652	-2.0235	-2.2635	-2.799	-3.8615	-0.596	-1.136	-2.2025	-0.6835	-2.331	-2.22	-1.5905	-3.4425	-2.602	-2.32	-2.106			4.9845	7.9105	7.481	0.7365		2.1865	-0.499	-0.0225	-0.438	3.15767	-3.125	-3.125			-2.106		1.9625	3.043	1.4285	-0.184	3.1025
TCGA-BH-A0H0-01	1.642	-0.297	1.939	0.0895	-1.2805	-0.8065	-1.34567	-2.074	-1.2815	-1.1705	-0.847	-1.5785	-1.387	-1.6175	-2.0125	0.11633	-1.7135	-2.074	-0.492	-1.8875	-0.398	-1.439	-1.3205	-2.23	-2.52	-0.121			-0.7305	4.6185	2.866	-2.3925		2.7275	-1.5325	-4.31	1.1395	0.12267	-1.913	-1.913			-0.121		0.6495	3.618	-1.776	-0.678	1.8285
TCGA-BH-A0H6-01	1.1735	-0.08	1.2535	-2.135	-3.9805	-3.071	-2.7945	-3.5515	-2.7875	-3.195	-2.609	-3.1085	-3.5255	-4.416	-4.2675	-0.70617	-4.099	-3.5515	-2.9215	-4.088	-3.348	-2.4625	-3.8325	-3.607	-2.201	-2.8625			5.561	8.0995	8.3325	1.2785		1.4815	-1.1675	0.2635	4.482	3.5925	-3.694	-3.694			-2.8625		1.753	1.8695	3.6525	-1.5765	2.3925
TCGA-BH-A0H7-01	0.6885	-0.4095	1.098	-0.9745	-2.098	-2.065	-2.4575	-2.698	-2.0765	-2.2125	-2.229	-2.223	-2.6205	-2.765	-2.0345	0.45217	-2.494	-2.698	-0.933	-2.6685	-2.0195	-2.1435	-3.1825	-2.474	-2.2705	-0.446			5.1595	8.27	8.603	1.8435		1.7205	0.138	-1.385	0.8885	4.18383	-2.8295	-2.8295			-0.446		-0.27	3.1875	2.95	-0.6945	2.5335
TCGA-BH-A0H9-01	2	0.369	1.631	-0.9315	-2.341	-2.008	-2.35717	-2.465	-2.1295	-2.208	-1.9735	-2.338	-2.25	-3.329	-2.587	-1.42183	-1.143	-2.465	-0.939	-3.179	-2.221	-1.8765	-3.1475	-2.7025	-1.201	-1.0265			3.026	6.8415	4.1935	0.1175		0.875	-2.3905	-2.6965	-2.1345	1.1345	-2.7895	-2.7895			-1.0265		2.004	2.529	0.55	-1.842	2.6025
TCGA-BH-A0HB-01	1.438	0.2775	1.1605	0.592	-1.7815	-1.665	-1.43183	-1.5535	-1.2205	-2.3045	-1.4255	-1.223	-1.5565	-1.958	-2.0205	0.89817	-1.317	-1.5535	-0.9695	-2.858	-0.998	-1.2905	-2.684	-1.335	-1.4525	-1.446			2.543	7.6755	5.9625	0.233		-0.1425	-3.3955	-3.0055	2.364	2.62917	-1.688	-1.688			-1.446		1.421	-0.586	2.102	0.657	3.577
TCGA-BH-A0HF-01	1.86475	-0.68175	2.5465	-2.04525	-3.72225	-2.89425	-2.82958	-3.07675	-2.41275	-2.38075	-3.00825	-2.07875	-3.51525	-3.66925	-2.40675	-1.21392	-2.37925	-3.07675	-3.16325	-3.31075	-2.36075	-2.50525	-3.44175	-3.00075	-2.74975	-1.31475			5.24575	7.86125	7.32925	1.33475		-0.63825	0.25575	-1.62625	-0.34775	3.50175	-4.06175	-4.06175			-1.31475		1.05575	3.36125	3.22025	-0.82025	2.49875
TCGA-BH-A0HI-01	3.03225	0.03575	2.9965	-1.75325	-2.88025	-3.05175	-3.43908	-3.18525	-2.50675	-2.42725	-3.22175	-2.60975	-3.17725	-3.27275	-1.68725	-1.51575	-1.92375	-3.18525	-2.21075	-4.36175	-3.01675	-2.58125	-3.55025	-3.36725	-3.13725	-2.03425			4.56375	7.16075	7.53075	-0.17375		2.12325	1.04675	-0.58975	-0.33025	2.89958	-4.65125	-4.65125			-2.03425		0.29475	4.26475	2.00325	-2.59025	2.00225
TCGA-BH-A0HN-01	3.112	0.305	2.807	-0.3735	0.0535	-0.2895	-0.96867	-1.144	-0.7855	-0.1845	-0.3905	0.6835	-0.7555	-3.0545	0.714	-0.036	-1.9575	-1.144	-0.604	-0.1585	0.5875	0.2285	-1.5995	0.0165	0.0465	-0.1725			2.1855	2.265	-3.2495	-2.4935		1.26	-2.1045	1.177	-3.5435	0.70133	-0.2675	-0.2675			-0.1725		1.3525	3.7125	-0.127	0.981	2.4035
TCGA-BH-A0HO-01	1.073	-0.4135	1.4865	-1.754	-2.8105	-3.063	-2.7305	-2.779	-2.422	-2.8275	-2.506	-2.6045	-3.066	-2.8435	-2.7745	-1.55083	-1.5965	-2.779	-1.8045	-3.664	-2.6305	-3.111	-3.07	-3.117	-2.804	-1.6335			2.436	6.5465	6.4125	-0.413		0.8685	-0.0535	-3.0885	-3.166	1.40983	-2.934	-2.934			-1.6335		0.003	4.3365	0.683	-1.851	1.615
TCGA-BH-A0HQ-01	1.1615	-0.5285	1.69	-1.0665	-2.37	-2.638	-3.04583	-2.45	-2.4815	-3.0425	-2.609	-2.7785	-3.161	-2.5205	-4.056	-1.31717	-1.19	-2.45	-1.906	-2.7595	-3.4355	-2.6505	-3.653	-3.552	-2.967	-1.4245			4.76	8.308	7.682	0.122		0.4325	-0.2055	-1.155	2.743	2.34317	-2.764	-2.764			-1.4245		1.121	1.746	2.0845	-1.4455	2.182
TCGA-BH-A0HU-01	1.716	0.161	1.555	0.9315	-0.1645	-0.999	-0.53033	-0.829	-1.1065	-0.8255	-0.816	-0.4085	-1.119	-2.6385	-3.558	1.90633	-1.3715	-0.829	-0.092	-1.0925	0.3675	-0.234	-2.395	-1.65	-1.8575	-0.1865			0.3525	7.3065	6.7205	-0.2035		2.5095	-0.2825	-2.8455	2.7365	2.03167	-1.781	-1.781			-0.1865		1.1185	0.8405	3.17	-0.4875	2.581
TCGA-A2-A0CM-01	1.614	-0.2385	1.8525	0.6665	-0.179	-1.152	-0.27533	-0.3245	-0.552	-1.4965	-0.214	0.3025	-0.5405	-0.2065	-1.6115	-0.36767	-0.432	-0.3245	0.591	-0.8975	-0.202	-0.3085	-0.3855	0.0695	-0.743	0.056			6.7555	7.226	6.716	0.14		-2.271	-2.021	-0.172	-3.3895	2.67267	-0.3355	-0.3355			0.056		1.37	0.6525	0.2025	-2.2005	1.487
TCGA-B6-A0I8-01	0.573	-0.5055	1.0785	-1.7715	-2.8805	-2.759	-2.90867	-3.532	-2.529	-2.955	-2.984	-3.4995	-3.405	-3.097	-2.95	-1.03133	-2.779	-3.532	-1.567	-4.5255	-4.055	-2.8195	-3.744	-3.804	-2.6645	-2.378			3.7875	7.6315	5.7385	-0.0785		-0.201	-2.812	-3.3025	3.9125	2.59033	-3.3495	-3.3495			-2.378		1.984	5.218	0.149	-1.508	2.017
TCGA-B6-A0IK-01	1.182	-0.054	1.236	-0.9185	-2.1035	-2.1975	-1.91917	-2.481	-0.779	-1.799	-2.039	-2.1215	-2.1565	-3.5635	-0.1465	-1.29783	-1.631	-2.481	-0.995	-2.373	-1.0975	-0.92	-2.216	-2.396	-0.7545	-0.227			3.7655	7.7455	5.223	0.242		-3.3245	-0.8635	-0.6165	-0.281	1.32283	-2.152	-2.152			-0.227		1.1635	5.5645	3.822	-2.0365	2.9675
TCGA-BH-A0HL-01	2.535	-1.098	3.633	0.2645	-0.564	-1.476	-1.44717	-0.6015	-1.2165	-2.098	-0.5695	-0.198	-0.975	-1.8065	-2.7225	-0.39317	-1.8665	-0.6015	-1.2155	-0.778	-0.457	-0.8375	-0.885	-1.921	-1.292	-1.434			6.0485	6.115	5.1105	0.2705		-0.633	-1.046	-0.829	-2.7685	2.51183	-0.505	-0.505			-1.434		1.938	-0.2965	-1.0705	-0.1975	2.447
TCGA-BH-A0HK-01	3.5065	-0.419	3.9255	-1.9065	-3.315	-3.592	-3.846	-3.5895	-2.5545	-3.145	-3.4995	-2.591	-4.268	-4.454	-2.9765	-2.79267	-3.151	-3.5895	-3.7845	-3.4615	-2.5115	-3.5535	-3.8315	-3.587	-3.68	-3.2615			-1.1005	4.729	2.075	-0.948		1.5235	-0.052	-2.8925	-2.5265	1.99267	-4.0595	-4.0595			-3.2615		0.502	4.0385	3.262	-1.7365	2.2205
bold Genes	ARE-gene cluster
bold and italics genes	Mitotic-gene cluster
[truncated: 379 more columns]

## Sheet: ARE-genes
Ensembl ID	Gene name	Cluster
ENSG00000134602	NA	1
ENSG00000145965	NA	1
ENSG00000117598	NA	1
ENSG00000184774	NA	1
ENSG00000170941	NA	1
ENSG00000188971	NA	1
ENSG00000204283	NA	1
ENSG00000180574	NA	1
ENSG00000175604	NA	1
ENSG00000205850	NA	1
ENSG00000183760	NA	1
ENSG00000172901	NA	1
ENSG00000145416	MARCH1	1
ENSG00000198060	MARCH5	1
ENSG00000145495	MARCH6	1
ENSG00000164402	SEPT8	1
ENSG00000186522	SEPT10	1
ENSG00000141338	ABCA8	1
ENSG00000135776	ABCB10	1
ENSG00000023839	ABCC2	1
ENSG00000164163	ABCE1	1
ENSG00000144827	ABHD10	1
ENSG00000163686	ABHD6	1
ENSG00000099204	ABLIM1	1
ENSG00000159842	ABR	1
ENSG00000115361	ACADL	1
ENSG00000114331	ACAP2	1
ENSG00000075239	ACAT1	1
ENSG00000068366	ACSL4	1
ENSG00000164398	ACSL6	1
ENSG00000138107	ACTR1A	1
ENSG00000115170	ACVR1	1
ENSG00000123612	ACVR1C	1
ENSG00000121989	ACVR2A	1
ENSG00000008277	ADAM22	1
ENSG00000042980	ADAM28	1
ENSG00000168615	ADAM9	1
ENSG00000138316	ADAMTS14	1
ENSG00000156140	ADAMTS3	1
ENSG00000158859	ADAMTS4	1
ENSG00000049192	ADAMTS6	1
ENSG00000136378	ADAMTS7	1
ENSG00000163638	ADAMTS9	1
ENSG00000156218	ADAMTSL3	1
ENSG00000065457	ADAT1	1
ENSG00000174233	ADCY6	1
ENSG00000198099	ADH4	1
ENSG00000156110	ADK	1
ENSG00000170425	ADORA2B	1
ENSG00000155966	AFF2	1
ENSG00000183077	AFMID	1
ENSG00000038002	AGA	1
ENSG00000146856	AGBL3	1
ENSG00000106351	AGFG2	1
ENSG00000162688	AGL	1
ENSG00000155189	AGPAT5	1
ENSG00000144891	AGTR1	1
ENSG00000153207	AHCTF1	1
ENSG00000173209	AHSA2	1
ENSG00000126878	AIF1L	1
ENSG00000129474	AJUBA	1
ENSG00000154027	AK5	1
ENSG00000170776	AKAP13	1
ENSG00000174574	AKIRIN1	1
ENSG00000162641	AKNAD1	1
ENSG00000184254	ALDH1A3	1
ENSG00000139133	ALG10	1
ENSG00000088035	ALG6	1
ENSG00000123505	AMD1	1
ENSG00000139344	AMDHD1	1
ENSG00000114019	AMOTL2	1
ENSG00000154188	ANGPT1	1
ENSG00000091879	ANGPT2	1
ENSG00000132855	ANGPTL3	1
ENSG00000171819	ANGPTL7	1
ENSG00000154122	ANKH	1
ENSG00000101745	ANKRD12	1
ENSG00000196774	ANKRD20A1	1
ENSG00000183148	ANKRD20A2	1
ENSG00000132498	ANKRD20A3	1
ENSG00000172014	ANKRD20A4	1
ENSG00000189127	ANKRD34B	1
ENSG00000154945	ANKRD40	1
ENSG00000132623	ANKRD5	1
ENSG00000139645	ANKRD52	1
ENSG00000135299	ANKRD6	1
ENSG00000181626	ANKRD62	1
ENSG00000171714	ANO5	1
ENSG00000152056	AP1S3	1
ENSG00000132842	AP3B1	1
ENSG00000103723	AP3B2	1
ENSG00000070718	AP3M2	1
ENSG00000081014	AP4E1	1
ENSG00000163697	APBB2	1
ENSG00000169621	APLF	1
ENSG00000157500	APPL1	1
ENSG00000171885	AQP4	1
ENSG00000047365	ARAP2	1
ENSG00000095139	ARCN1	1
ENSG00000198826	ARHGAP11A	1
ENSG00000107863	ARHGAP21	1
ENSG00000138639	ARHGAP24	1
ENSG00000147799	ARHGAP39	1
ENSG00000047648	ARHGAP6	1
ENSG00000104728	ARHGEF10	1
ENSG00000142632	ARHGEF19	1
ENSG00000137135	ARHGEF39	1
ENSG00000131089	ARHGEF9	1
ENSG00000049618	ARID1B	1
ENSG00000189079	ARID2	1
ENSG00000032219	ARID4A	1
ENSG00000054267	ARID4B	1
ENSG00000169379	ARL13B	1
ENSG00000179674	ARL14	1
ENSG00000152219	ARL14EP	1
ENSG00000185305	ARL15	1
ENSG00000188042	ARL4C	1
ENSG00000162980	ARL5A	1
ENSG00000113966	ARL6	1
ENSG00000177917	ARL6IP6	1
ENSG00000102401	ARMCX3	1
ENSG00000143437	ARNT	1
ENSG00000162704	ARPC5	1
ENSG00000172995	ARPP21	1
ENSG00000111339	ART4	1
ENSG00000004848	ARX	1
ENSG00000151693	ASAP2	1
ENSG00000115239	ASB3	1
ENSG00000005981	ASB4	1
ENSG00000164122	ASB5	1
ENSG00000148331	ASB6	1
ENSG00000119778	ATAD2B	1
ENSG00000176208	ATAD5	1
ENSG00000107669	ATE1	1
ENSG00000115966	ATF2	1
ENSG00000171681	ATF7IP	1
ENSG00000145782	ATG12	1
ENSG00000175224	ATG13	1
ENSG00000119787	ATL2	1
ENSG00000111676	ATN1	1
ENSG00000206190	ATP10A	1
ENSG00000118322	ATP10B	1
ENSG00000145246	ATP10D	1
ENSG00000058063	ATP11B	1
ENSG00000101974	ATP11C	1
ENSG00000143153	ATP1B1	1
ENSG00000157087	ATP2B2	1
ENSG00000186009	ATP4B	1
ENSG00000116459	ATP5F1	1
ENSG00000167283	ATP5L	1
ENSG00000182220	ATP6AP2	1
ENSG00000114573	ATP6V1A	1
ENSG00000165240	ATP7A	1
ENSG00000054793	ATP9A	1
ENSG00000168488	ATXN2L	1
ENSG00000148090	AUH	1
ENSG00000105778	AVL9	1
ENSG00000168646	AXIN2	1
ENSG00000169255	B3GALNT1	1
ENSG00000162885	B3GALNT2	1
ENSG00000176022	B3GALT6	1
ENSG00000187676	B3GALTL	1
ENSG00000112309	B3GAT2	1
ENSG00000170340	B3GNT2	1
ENSG00000176597	B3GNT5	1
ENSG00000158470	B4GALT5	1
ENSG00000135298	BAI3	1
ENSG00000143032	BARHL2	1
ENSG00000123636	BAZ2B	1
ENSG00000163093	BBS5	1
ENSG00000138686	BBS7	1
ENSG00000122507	BBS9	1
ENSG00000137936	BCAR3	1
ENSG00000064787	BCAS1	1
ENSG00000124243	BCAS4	1
ENSG00000186666	BCDIN3D	1
ENSG00000083123	BCKDHB	1
ENSG00000142867	BCL10	1
ENSG00000119866	BCL11A	1
ENSG00000121380	BCL2L14	1
ENSG00000116128	BCL9	1
ENSG00000135697	BCMO1	1
ENSG00000183337	BCOR	1
ENSG00000085185	BCORL1	1
ENSG00000186716	BCR	1
ENSG00000164039	BDH2	1
ENSG00000176697	BDNF	1
ENSG00000177324	BEND2	1
ENSG00000178409	BEND3	1
ENSG00000188848	BEND4	1
ENSG00000145692	BHMT	1
ENSG00000151746	BICD1	1
ENSG00000197299	BLM	1
ENSG00000188428	BLOC1S5	1
ENSG00000104164	BLOC1S6	1
ENSG00000117475	BLZF1	1
ENSG00000168283	BMI1	1
ENSG00000125845	BMP2	1
ENSG00000125378	BMP4	1
ENSG00000153162	BMP6	1
ENSG00000107779	BMPR1A	1
ENSG00000102010	BMX	1
ENSG00000140299	BNIP2	1
ENSG00000176171	BNIP3	1
ENSG00000104765	BNIP3L	1
ENSG00000038219	BOD1L1	1
ENSG00000163170	BOLA3	1
ENSG00000152430	BOLL	1
ENSG00000136122	BORA	1
ENSG00000172331	BPGM	1
ENSG00000162813	BPNT1	1
ENSG00000169925	BRD3	1
ENSG00000113460	BRIX1	1
ENSG00000164061	BSN	1
ENSG00000109743	BST1	1
ENSG00000154640	BTG3	1
ENSG00000168903	BTNL3	1
ENSG00000154473	BUB3	1
ENSG00000112276	BVES	1
ENSG00000176236	C10orf111	1
ENSG00000204161	C10orf128	1
ENSG00000154493	C10orf90	1
ENSG00000158636	C11orf30	1
ENSG00000182919	C11orf54	1
ENSG00000109944	C11orf63	1
ENSG00000180425	C11orf71	1
ENSG00000185742	C11orf87	1
ENSG00000187479	C11orf96	1
ENSG00000047621	C12orf4	1
ENSG00000070269	C14orf101	1
ENSG00000100744	C14orf129	1
ENSG00000186960	C14orf23	1
ENSG00000139971	C14orf37	1
ENSG00000179008	C14orf39	1
ENSG00000134152	C15orf29	1
ENSG00000176753	C15orf56	1
ENSG00000167523	C16orf55	1
ENSG00000180336	C17orf104	1
ENSG00000141219	C17orf80	1
ENSG00000152242	C18orf25	1
ENSG00000206043	C18orf63	1
ENSG00000006015	C19orf60	1
ENSG00000197223	C1D	1
ENSG00000106392	C1GALT1	1
ENSG00000179397	C1orf101	1
ENSG00000000460	C1orf112	1
ENSG00000182795	C1orf116	1
ENSG00000185523	C1orf227	1
ENSG00000157181	C1orf27	1
ENSG00000143612	C1orf43	1
ENSG00000159208	C1orf51	1
ENSG00000198715	C1orf85	1
ENSG00000162585	C1orf86	1
ENSG00000203685	C1orf95	1
ENSG00000203721	C1orf98	1
ENSG00000205863	C1QTNF9B	1
ENSG00000204364	C2	1
ENSG00000197183	C20orf112	1
ENSG00000089101	C20orf26	1
ENSG00000156265	C21orf7	1
ENSG00000150873	C2orf50	1
ENSG00000183833	C3orf15	1
ENSG00000179021	C3orf38	1
ENSG00000180044	C3orf80	1
ENSG00000174749	C4orf32	1
ENSG00000187533	C4orf40	1
ENSG00000197405	C5AR1	1
ENSG00000113583	C5orf15	1
ENSG00000181904	C5orf24	1
ENSG00000170085	C5orf25	1
ENSG00000151881	C5orf28	1
ENSG00000181751	C5orf30	1
ENSG00000113597	C5orf44	1
ENSG00000146476	C6orf211	1
ENSG00000165120	C7orf45	1
ENSG00000164746	C7orf57	1
ENSG00000168333	C8orf22	1
ENSG00000165084	C8orf34	1
ENSG00000156172	C8orf37	1
ENSG00000176907	C8orf4	1
ENSG00000137038	C9orf123	1
ENSG00000165181	C9orf84	1
ENSG00000155621	C9orf85	1
ENSG00000165233	C9orf89	1
ENSG00000116161	CACYBP	1
ENSG00000175161	CADM2	1
ENSG00000012822	CALCOCO1	1
ENSG00000138172	CALHM2	1
ENSG00000198668	CALM1	1
ENSG00000145349	CAMK2D	1
ENSG00000152495	CAMK4	1
ENSG00000118200	CAMSAP2	1
ENSG00000111530	CAND1	1
ENSG00000182472	CAPN12	1
ENSG00000092529	CAPN3	1
ENSG00000135387	CAPRIN1	1
ENSG00000180881	CAPS2	1
ENSG00000127995	CASD1	1
ENSG00000105971	CAV2	1
ENSG00000078699	CBFA2T2	1
ENSG00000110395	CBL	1
ENSG00000145439	CBR4	1
ENSG00000172785	CBWD1	1
ENSG00000136682	CBWD2	1
ENSG00000196873	CBWD3	1
ENSG00000147996	CBWD5	1
ENSG00000204790	CBWD6	1
ENSG00000122565	CBX3	1
ENSG00000137944	CCBL2	1
ENSG00000169193	CCDC126	1
ENSG00000004766	CCDC132	1
ENSG00000163492	CCDC141	1
ENSG00000181982	CCDC149	1
ENSG00000164989	CCDC171	1
ENSG00000176155	CCDC57	1
ENSG00000152133	CCDC75	1
ENSG00000055813	CCDC85A	1
ENSG00000110104	CCDC86	1
ENSG00000115355	CCDC88A	1
ENSG00000050393	CCDC90A	1
ENSG00000040275	CCDC99	1
ENSG00000187094	CCK	1
ENSG00000181374	CCL13	1
ENSG00000161573	CCL16	1
ENSG00000129277	CCL4	1
ENSG00000205020	CCL4L1	1
ENSG00000147082	CCNB3	1
ENSG00000112237	CCNC	1
ENSG00000110092	CCND1	1
ENSG00000112576	CCND3	1
ENSG00000175305	CCNE2	1
ENSG00000183813	CCR4	1
ENSG00000112486	CCR6	1
ENSG00000154429	CCSAP	1
ENSG00000146731	CCT6A	1
ENSG00000163606	CD200R1	1
ENSG00000004468	CD38	1
ENSG00000160654	CD3G	1
ENSG00000101017	CD40	1
ENSG00000117335	CD46	1
ENSG00000117091	CD48	1
ENSG00000153283	CD96	1
ENSG00000102181	CD99L2	1
ENSG00000079335	CDC14A	1
ENSG00000081377	CDC14B	1
ENSG00000158985	CDC42SE2	1
ENSG00000094804	CDC6	1
ENSG00000164649	CDCA7L	1
ENSG00000163814	CDCP1	1
ENSG00000040731	CDH10	1
ENSG00000113361	CDH6	1
ENSG00000103502	CDIPT	1
ENSG00000155111	CDK19	1
ENSG00000123374	CDK2	1
ENSG00000156345	CDK20	1
ENSG00000105810	CDK6	1
ENSG00000006837	CDKL3	1
ENSG00000129355	CDKN2D	1
ENSG00000163624	CDS1	1
ENSG00000101290	CDS2	1
ENSG00000101489	CELF4	1
ENSG00000143126	CELSR2	1
ENSG00000115163	CENPA	1
ENSG00000123219	CENPK	1
ENSG00000031691	CENPQ	1
ENSG00000203760	CENPW	1
ENSG00000174799	CEP135	1
ENSG00000198707	CEP290	1
ENSG00000011523	CEP68	1
ENSG00000182504	CEP97	1
ENSG00000134255	CEPT1	1
ENSG00000100422	CERK	1
ENSG00000134389	CFHR5	1
ENSG00000165410	CFL2	1
ENSG00000138135	CH25H	1
ENSG00000171316	CHD7	1
ENSG00000072609	CHFR	1
ENSG00000204116	CHIC1	1
ENSG00000134121	CHL1	1
ENSG00000188419	CHM	1
ENSG00000115561	CHMP3	1
ENSG00000101421	CHMP4B	1
ENSG00000128656	CHN1	1
ENSG00000106069	CHN2	1
ENSG00000187446	CHP1	1
ENSG00000181072	CHRM2	1
ENSG00000171310	CHST11	1
ENSG00000169105	CHST14	1
ENSG00000160679	CHTOP	1
ENSG00000144021	CIAO1	1
ENSG00000169607	CKAP2L	1
ENSG00000074054	CLASP1	1
ENSG00000171365	CLCN5	1
ENSG00000159261	CLDN14	1
ENSG00000156284	CLDN8	1
ENSG00000166523	CLEC4E	1
ENSG00000169504	CLIC4	1
ENSG00000112782	CLIC5	1
ENSG00000109684	CLNK	1
ENSG00000175416	CLTB	1
ENSG00000070371	CLTCL1	1
ENSG00000177182	CLVS1	1
ENSG00000162368	CMPK1	1
ENSG00000164309	CMYA5	1
ENSG00000132259	CNGA4	1
ENSG00000149970	CNKSR2	1
ENSG00000113300	CNOT6	1
ENSG00000118432	CNR1	1
ENSG00000174469	CNTNAP2	1
ENSG00000106714	CNTNAP3	1
ENSG00000154529	CNTNAP3B	1
ENSG00000119397	CNTRL	1
ENSG00000106078	COBL	1
ENSG00000082438	COBLL1	1
ENSG00000060718	COL11A1	1
ENSG00000111799	COL12A1	1
ENSG00000171502	COL24A1	1
ENSG00000113163	COL4A3BP	1
ENSG00000204262	COL5A2	1
ENSG00000093010	COMT	1
ENSG00000167186	COQ7	1
ENSG00000145244	CORIN	1
ENSG00000106789	CORO2A	1
ENSG00000138495	COX17	1
ENSG00000163626	COX18	1
ENSG00000203667	COX20	1
ENSG00000115944	COX7A2L	1
ENSG00000109472	CPE	1
ENSG00000106034	CPED1	1
ENSG00000165934	CPSF2	1
ENSG00000110090	CPT1A	1
ENSG00000007545	CRAMP1L	1
ENSG00000130545	CRB3	1
ENSG00000118260	CREB1	1
ENSG00000111269	CREBL2	1
ENSG00000145708	CRHBP	1
ENSG00000150938	CRIM1	1
ENSG00000101343	CRNKL1	1
ENSG00000080200	CRYBG3	1
ENSG00000009307	CSDE1	1
ENSG00000124207	CSE1L	1
ENSG00000198223	CSF2RA	1
ENSG00000147408	CSGALNACT1	1
ENSG00000169826	CSGALNACT2	1
ENSG00000104218	CSPP1	1
ENSG00000129170	CSRP3	1
ENSG00000144677	CTDSPL	1
ENSG00000118523	CTGF	1
ENSG00000116761	CTH	1
ENSG00000198561	CTNND1	1
ENSG00000109861	CTSC	1
ENSG00000143079	CTTNBP2NL	1
ENSG00000166266	CUL5	1
ENSG00000111249	CUX2	1
ENSG00000006210	CX3CL1	1
ENSG00000154639	CXADR	1
ENSG00000107562	CXCL12	1
ENSG00000163735	CXCL5	1
ENSG00000173681	CXorf23	1
ENSG00000185753	CXorf38	1
ENSG00000168772	CXXC4	1
ENSG00000103018	CYB5B	1
ENSG00000055163	CYFIP2	1
ENSG00000138061	CYP1B1	1
ENSG00000095596	CYP26A1	1
ENSG00000001630	CYP51A1	1
ENSG00000167910	CYP7A1	1
ENSG00000142871	CYR61	1
ENSG00000115165	CYTIP	1
ENSG00000146122	DAAM2	1
ENSG00000129562	DAD1	1
ENSG00000196730	DAPK1	1
ENSG00000070190	DAPP1	1
ENSG00000105516	DBP	1
ENSG00000138231	DBR1	1
ENSG00000137992	DBT	1
ENSG00000198876	DCAF12	1
ENSG00000146038	DCDC2	1
ENSG00000170959	DCDC5	1
ENSG00000152457	DCLRE1C	1
ENSG00000080166	DCT	1
ENSG00000104671	DCTN6	1
ENSG00000043093	DCUN1D1	1
ENSG00000150401	DCUN1D2	1
ENSG00000188215	DCUN1D3	1
ENSG00000130311	DDA1	1
ENSG00000167986	DDB1	1
ENSG00000067048	DDX3Y	1
ENSG00000118197	DDX59	1
ENSG00000137628	DDX60	1
ENSG00000181381	DDX60L	1
ENSG00000105339	DENND3	1
ENSG00000198837	DENND4B	1
ENSG00000137145	DENND4C	1
ENSG00000024526	DEPDC1	1
ENSG00000023697	DERA	1
ENSG00000095397	DFNB31	1
ENSG00000184210	DGAT2L6	1
ENSG00000178700	DHFRL1	1
ENSG00000139549	DHH	1
ENSG00000095059	DHPS	1
ENSG00000067596	DHX8	1
ENSG00000100697	DICER1	1
ENSG00000151240	DIP2C	1
ENSG00000165023	DIRAS2	1
ENSG00000083520	DIS3	1
ENSG00000162946	DISC1	1
ENSG00000150764	DIXDC1	1
ENSG00000186047	DLEU7	1
ENSG00000082458	DLG3	1
ENSG00000144355	DLX1	1
ENSG00000100206	DMC1	1
ENSG00000198947	DMD	1
ENSG00000183914	DNAH2	1
ENSG00000140403	DNAJA4	1
ENSG00000162616	DNAJB4	1
ENSG00000128590	DNAJB9	1
ENSG00000077232	DNAJC10	1
ENSG00000120675	DNAJC15	1
ENSG00000116675	DNAJC6	1
ENSG00000100246	DNAL4	1
ENSG00000105612	DNASE2	1
ENSG00000087470	DNM1L	1
ENSG00000067334	DNTTIP2	1
ENSG00000116641	DOCK7	1
ENSG00000154813	DPH3	1
ENSG00000173852	DPY19L1	1
ENSG00000147647	DPYS	1
ENSG00000113657	DPYSL3	1
ENSG00000117505	DR1	1
ENSG00000175550	DRAP1	1
ENSG00000162490	DRAXIN	1
ENSG00000183145	DSCR6	1
ENSG00000151914	DST	1
ENSG00000104047	DTWD1	1
ENSG00000158050	DUSP2	1
ENSG00000120875	DUSP4	1
ENSG00000088986	DYNLL1	1
ENSG00000165169	DYNLT3	1
ENSG00000157540	DYRK1A	1
ENSG00000133740	E2F5	1
ENSG00000129173	E2F8	1
ENSG00000145088	EAF2	1
ENSG00000147654	EBAG9	1
ENSG00000108001	EBF3	1
ENSG00000122882	ECD	1
ENSG00000117298	ECE1	1
ENSG00000093144	ECHDC1	1
ENSG00000106823	ECM2	1
ENSG00000164176	EDIL3	1
ENSG00000078401	EDN1	1
ENSG00000136160	EDNRB	1
ENSG00000178852	EFCAB13	1
ENSG00000203965	EFCAB7	1
ENSG00000183690	EFHC2	1
ENSG00000132294	EFR3A	1
ENSG00000100842	EFS	1
ENSG00000135766	EGLN1	1
ENSG00000179388	EGR3	1
ENSG00000024422	EHD2	1
ENSG00000173674	EIF1AX	1
ENSG00000144895	EIF2A	1
ENSG00000055332	EIF2AK2	1
ENSG00000172071	EIF2AK3	1
ENSG00000107581	EIF3A	1
ENSG00000163577	EIF5A2	1
ENSG00000107105	ELAVL2	1
ENSG00000111145	ELK3	1
ENSG00000158711	ELK4	1
ENSG00000105656	ELL	1
ENSG00000062598	ELMO2	1
ENSG00000118402	ELOVL4	1
ENSG00000012660	ELOVL5	1
ENSG00000164181	ELOVL7	1
ENSG00000162618	ELTD1	1
ENSG00000066629	EML1	1
ENSG00000135638	EMX1	1
ENSG00000163064	EN1	1
ENSG00000164778	EN2	1
ENSG00000151023	ENKUR	1
ENSG00000197594	ENPP1	1
ENSG00000136960	ENPP2	1
ENSG00000112796	ENPP5	1
ENSG00000163378	EOGT	1
ENSG00000185684	EP400NL	1
ENSG00000082397	EPB41L3	1
ENSG00000115109	EPB41L5	1
ENSG00000135999	EPC2	1
ENSG00000183317	EPHA10	1
ENSG00000044524	EPHA3	1
ENSG00000116106	EPHA4	1
ENSG00000196411	EPHB4	1
ENSG00000101448	EPPIN	1
ENSG00000164307	ERAP1	1
ENSG00000112851	ERBB2IP	1
ENSG00000087502	ERGIC2	1
ENSG00000104714	ERICH1	1
ENSG00000136541	ERMN	1
ENSG00000099219	ERMP1	1
ENSG00000197930	ERO1L	1
ENSG00000086619	ERO1LB	1
ENSG00000023318	ERP44	1
ENSG00000089048	ESF1	1
ENSG00000164283	ESM1	1
ENSG00000091831	ESR1	1
ENSG00000140009	ESR2	1
ENSG00000173153	ESRRA	1
ENSG00000196482	ESRRG	1
ENSG00000120705	ETF1	1
ENSG00000139163	ETNK1	1
ENSG00000157557	ETS2	1
ENSG00000006468	ETV1	1
ENSG00000182944	EWSR1	1
ENSG00000138190	EXOC6	1
ENSG00000112319	EYA4	1
ENSG00000092820	EZR	1
ENSG00000164251	F2RL1	1
ENSG00000164220	F2RL2	1
ENSG00000103089	FA2H	1
ENSG00000145384	FABP2	1
ENSG00000164434	FABP7	1
ENSG00000133193	FAM104A	1
ENSG00000145569	FAM105A	1
ENSG00000150510	FAM124A	1
ENSG00000179083	FAM133A	1
ENSG00000082269	FAM135A	1
ENSG00000138286	FAM149B1	1
ENSG00000196711	FAM150A	1
ENSG00000188659	FAM154B	1
ENSG00000170264	FAM161A	1
ENSG00000151327	FAM177A1	1
ENSG00000189350	FAM179A	1
ENSG00000047662	FAM184B	1
ENSG00000148481	FAM188A	1
ENSG00000188916	FAM196A	1
ENSG00000164125	FAM198B	1
ENSG00000163377	FAM19A4	1
ENSG00000165669	FAM204A	1
ENSG00000108021	FAM208B	1
ENSG00000197852	FAM212B	1
ENSG00000047346	FAM214A	1
ENSG00000204856	FAM216A	1
ENSG00000196227	FAM217B	1
ENSG00000178033	FAM26E	1
ENSG00000128578	FAM40B	1
ENSG00000197872	FAM49A	1
ENSG00000153310	FAM49B	1
ENSG00000198797	FAM5B	1
ENSG00000111913	FAM65B	1
ENSG00000180488	FAM73A	1
ENSG00000077458	FAM76B	1
ENSG00000188859	FAM78B	1
ENSG00000157470	FAM81A	1
ENSG00000137414	FAM8A1	1
ENSG00000187741	FANCA	1
ENSG00000158169	FANCC	1
ENSG00000115392	FANCL	1
ENSG00000026103	FAS	1
ENSG00000117560	FASLG	1
ENSG00000138399	FASTKD1	1
ENSG00000083857	FAT1	1
ENSG00000165323	FAT3	1
ENSG00000166147	FBN1	1
ENSG00000156860	FBRS	1
ENSG00000153832	FBXO36	1
ENSG00000174013	FBXO45	1
ENSG00000109670	FBXW7	1
ENSG00000119616	FCF1	1
ENSG00000137478	FCHSD2	1
ENSG00000163534	FCRL1	1
ENSG00000132185	FCRLA	1
ENSG00000180263	FGD6	1
ENSG00000113578	FGF1	1
ENSG00000102466	FGF14	1
ENSG00000162344	FGF19	1
ENSG00000075388	FGF4	1
ENSG00000138675	FGF5	1
ENSG00000140285	FGF7	1
ENSG00000127418	FGFRL1	1
ENSG00000000938	FGR	1
ENSG00000091483	FH	1
ENSG00000134775	FHOD3	1
ENSG00000176971	FIBIN	1
ENSG00000106080	FKBP14	1
ENSG00000106692	FKTN	1
ENSG00000143520	FLG2	1
ENSG00000185070	FLRT2	1
ENSG00000125848	FLRT3	1
ENSG00000161791	FMNL3	1
ENSG00000115414	FN1	1
ENSG00000137942	FNBP1L	1
ENSG00000102531	FNDC3A	1
ENSG00000184492	FOXD4L1	1
ENSG00000187559	FOXD4L3	1
ENSG00000204793	FOXD4L6	1
ENSG00000137273	FOXF2	1
ENSG00000198815	FOXJ3	1
ENSG00000164916	FOXK1	1
ENSG00000053254	FOXN3	1
ENSG00000150907	FOXO1	1
ENSG00000164379	FOXQ1	1
ENSG00000116783	FPGT-TNNI3K	1
ENSG00000171049	FPR2	1
ENSG00000172159	FRMD3	1
ENSG00000171877	FRMD5	1
ENSG00000169933	FRMPD4	1
ENSG00000137218	FRS3	1
ENSG00000186628	FSD2	1
ENSG00000163430	FSTL1	1
ENSG00000168843	FSTL5	1
ENSG00000167996	FTH1	1
ENSG00000180917	FTSJD1	1
ENSG00000069509	FUNDC1	1
ENSG00000165775	FUNDC2	1
ENSG00000172461	FUT9	1
ENSG00000132286	FXC1	1
ENSG00000114416	FXR1	1
ENSG00000155760	FZD7	1
ENSG00000177283	FZD8	1
ENSG00000092140	G2E3	1
ENSG00000138757	G3BP2	1
ENSG00000139112	GABARAPL1	1
ENSG00000154727	GABPA	1
ENSG00000104064	GABPB1	1
ENSG00000143458	GABPB2	1
ENSG00000109158	GABRA4	1
ENSG00000146276	GABRR1	1
ENSG00000128683	GAD1	1
ENSG00000109586	GALNT7	1
ENSG00000110328	GALNTL4	1
ENSG00000166573	GALR1	1
ENSG00000165219	GAPVD1	1
ENSG00000179348	GATA2	1
ENSG00000117228	GBP1	1
ENSG00000162654	GBP4	1
ENSG00000168505	GBX2	1
ENSG00000005436	GCFC2	1
ENSG00000131979	GCH1	1
ENSG00000023909	GCLM	1
ENSG00000187210	GCNT1	1
ENSG00000174500	GCSAM	1
ENSG00000119125	GDA	1
ENSG00000082516	GEMIN5	1
ENSG00000178295	GEN1	1
ENSG00000164347	GFM2	1
ENSG00000145990	GFOD1	1
ENSG00000131459	GFPT2	1
ENSG00000138604	GLCE	1
ENSG00000107249	GLIS3	1
ENSG00000145451	GLRA3	1
ENSG00000108010	GLRX3	1
ENSG00000198756	GLT25D2	1
ENSG00000197045	GMFB	1
ENSG00000205835	GMNC	1
ENSG00000156052	GNAQ	1
ENSG00000114450	GNB4	1
ENSG00000172380	GNG12	1
ENSG00000100522	GNPNAT1	1
ENSG00000109163	GNRHR	1
ENSG00000143457	GOLPH3L	1
ENSG00000111711	GOLT1B	1
ENSG00000088053	GP6	1
ENSG00000076716	GPC4	1
ENSG00000179399	GPC5	1
ENSG00000115159	GPD2	1
ENSG00000150625	GPM6A	1
ENSG00000111231	GPN3	1
ENSG00000152749	GPR180	1
ENSG00000120436	GPR31	1
ENSG00000164604	GPR85	1
ENSG00000089351	GRAMD1A	1
ENSG00000175318	GRAMD2	1
ENSG00000106070	GRB10	1
ENSG00000177885	GRB2	1
ENSG00000164418	GRIK2	1
ENSG00000180613	GSX2	1
ENSG00000140307	GTF2A2	1
ENSG00000197265	GTF2E2	1
ENSG00000119041	GTF3C3	1
ENSG00000105793	GTPBP10	1
ENSG00000172432	GTPBP2	1
ENSG00000070019	GUCY2C	1
ENSG00000144366	GULP1	1
ENSG00000206159	GYG2P1	1
ENSG00000111713	GYS2	1
ENSG00000125812	GZF1	1
ENSG00000132475	H3F3B	1
ENSG00000130956	HABP4	1
ENSG00000085382	HACE1	1
ENSG00000147874	HAUS6	1
ENSG00000138622	HCN4	1
ENSG00000116478	HDAC1	1
ENSG00000068024	HDAC4	1
ENSG00000108840	HDAC5	1
ENSG00000119285	HEATR1	1
ENSG00000008869	HEATR5B	1
ENSG00000068097	HEATR6	1
ENSG00000092148	HECTD1	1
ENSG00000165338	HECTD2	1
ENSG00000138411	HECW2	1
ENSG00000173706	HEG1	1
ENSG00000163312	HELQ	1
ENSG00000103657	HERC1	1
ENSG00000135547	HEY2	1
ENSG00000019991	HGF	1
ENSG00000164161	HHIP	1
ENSG00000156875	HIAT1	1
ENSG00000148110	HIATL1	1
ENSG00000181061	HIGD1A	1
ENSG00000111911	HINT3	1
ENSG00000180596	HIST1H2BC	1
ENSG00000196532	HIST1H3C	1
ENSG00000159399	HK2	1
ENSG00000206509	HLA-F	1
ENSG00000071794	HLTF	1
ENSG00000146151	HMGCLL1	1
ENSG00000198157	HMGN5	1
ENSG00000152795	HNRPDL	1
ENSG00000143889	HNRPLL	1
ENSG00000134709	HOOK1	1
ENSG00000168172	HOOK3	1
ENSG00000176635	HORMAD2	1
ENSG00000173917	HOXB2	1
ENSG00000120075	HOXB5	1
ENSG00000197757	HOXC6	1
ENSG00000127483	HP1BP3	1
ENSG00000153936	HS2ST1	1
ENSG00000149084	HSD17B12	1
ENSG00000132196	HSD17B7	1
ENSG00000025156	HSF2	1
ENSG00000176160	HSF5	1
ENSG00000187522	HSPA14	1
ENSG00000173110	HSPA6	1
ENSG00000120694	HSPH1	1
ENSG00000179097	HTR1F	1
ENSG00000102468	HTR2A	1
ENSG00000147246	HTR2C	1
ENSG00000142149	HUNK	1
ENSG00000149428	HYOU1	1
ENSG00000115738	ID2	1
ENSG00000166411	IDH3A	1
ENSG00000010404	IDS	1
ENSG00000188483	IER5L	1
ENSG00000169991	IFFO2	1
ENSG00000119922	IFIT2	1
ENSG00000152778	IFIT5	1
ENSG00000142166	IFNAR1	1
ENSG00000111537	IFNG	1
ENSG00000119650	IFT43	1
ENSG00000032742	IFT88	1
ENSG00000163453	IGFBP7	1
ENSG00000070061	IKBKAP	1
ENSG00000123411	IKZF4	1
ENSG00000095574	IKZF5	1
ENSG00000136634	IL10	1
ENSG00000169194	IL13	1
ENSG00000164136	IL15	1
ENSG00000134470	IL15RA	1
ENSG00000115008	IL1A	1
ENSG00000103522	IL21R	1
ENSG00000127318	IL22	1
ENSG00000164485	IL22RA2	1
ENSG00000110944	IL23A	1
ENSG00000197110	IL28B	1
ENSG00000136696	IL36B	1
ENSG00000136244	IL6	1
ENSG00000068383	INPP5A	1
ENSG00000198825	INPP5F	1
ENSG00000125629	INSIG2	1
ENSG00000074706	IPCEF1	1
ENSG00000065150	IPO5	1
ENSG00000127080	IPPK	1
ENSG00000174628	IQCK	1
ENSG00000140575	IQGAP1	1
ENSG00000124313	IQSEC2	1
ENSG00000198001	IRAK4	1
ENSG00000125347	IRF1	1
ENSG00000128604	IRF5	1
ENSG00000185950	IRS2	1
ENSG00000176842	IRX5	1
ENSG00000135070	ISCA1	1
ENSG00000143319	ISG20L2	1
ENSG00000066583	ISOC1	1
ENSG00000078747	ITCH	1
ENSG00000129636	ITFG1	1
ENSG00000138448	ITGAV	1
ENSG00000160255	ITGB2	1
ENSG00000115221	ITGB6	1
ENSG00000123243	ITIH5	1
ENSG00000113263	ITK	1
ENSG00000143772	ITPKB	1
ENSG00000198399	ITSN2	1
ENSG00000009765	IYD	1
ENSG00000153814	JAZF1	1
ENSG00000050130	JKAMP	1
ENSG00000183340	JRKL	1
ENSG00000107104	KANK1	1
ENSG00000144445	KANSL1L	1
ENSG00000156650	KAT6B	1
ENSG00000167216	KATNAL2	1
ENSG00000176595	KBTBD11	1
ENSG00000163376	KBTBD8	1
ENSG00000171385	KCND3	1
ENSG00000171126	KCNG3	1
ENSG00000183960	KCNH8	1
ENSG00000157542	KCNJ6	1
ENSG00000135750	KCNK1	1
ENSG00000082482	KCNK2	1
ENSG00000197584	KCNMB2	1
ENSG00000162687	KCNT2	1
ENSG00000164794	KCNV1	1
ENSG00000110906	KCTD10	1
ENSG00000174943	KCTD13	1
ENSG00000136636	KCTD3	1
ENSG00000180332	KCTD4	1
ENSG00000168301	KCTD6	1
ENSG00000104756	KCTD9	1
ENSG00000178202	KDELC2	1
ENSG00000107077	KDM4C	1
ENSG00000128052	KDR	1
ENSG00000080608	KIAA0020	1
ENSG00000122548	KIAA0087	1
ENSG00000170871	KIAA0232	1
ENSG00000142687	KIAA0319L	1
ENSG00000136051	KIAA1033	1
ENSG00000174145	KIAA1239	1
ENSG00000164659	KIAA1324L	1
ENSG00000164944	KIAA1429	1
ENSG00000165757	KIAA1462	1
ENSG00000165185	KIAA1958	1
ENSG00000116685	KIAA2013	1
ENSG00000050030	KIAA2022	1
ENSG00000134313	KIDINS220	1
ENSG00000138160	KIF11	1
ENSG00000121621	KIF18A	1
ENSG00000054523	KIF1B	1
ENSG00000112984	KIF20A	1
ENSG00000116852	KIF21B	1
ENSG00000165115	KIF27	1
ENSG00000068796	KIF2A	1
ENSG00000125498	KIR2DL1	1
ENSG00000183853	KIRREL	1
ENSG00000126259	KIRREL2	1
ENSG00000172059	KLF11	1
ENSG00000169926	KLF13	1
ENSG00000163884	KLF15	1
ENSG00000197776	KLHDC1	1
ENSG00000114648	KLHL18	1
ENSG00000109466	KLHL2	1
ENSG00000076321	KLHL20	1
ENSG00000162413	KLHL21	1
ENSG00000119771	KLHL29	1
ENSG00000146021	KLHL3	1
ENSG00000102271	KLHL4	1
ENSG00000145332	KLHL8	1
ENSG00000198642	KLHL9	1
ENSG00000134539	KLRD1	1
ENSG00000186432	KPNA4	1
ENSG00000025800	KPNA6	1
ENSG00000133703	KRAS	1
ENSG00000198945	L3MBTL3	1
ENSG00000135862	LAMC1	1
ENSG00000058085	LAMC2	1
ENSG00000002549	LAP3	1
ENSG00000162511	LAPTM5	1
ENSG00000138709	LARP1B	1
ENSG00000150457	LATS2	1
ENSG00000172155	LCE1D	1
ENSG00000178177	LCORL	1
ENSG00000130164	LDLR	1
ENSG00000179241	LDLRAD3	1
ENSG00000174106	LEMD3	1
ENSG00000141696	LEPREL4	1
ENSG00000104660	LEPROTL1	1
ENSG00000168924	LETM1	1
ENSG00000116977	LGALS8	1
ENSG00000145685	LHFPL2	1
ENSG00000107187	LHX3	1
ENSG00000143355	LHX9	1
ENSG00000131914	LIN28A	1
ENSG00000189308	LIN54	1
ENSG00000183814	LIN9	1
ENSG00000140471	LINS	1
ENSG00000074695	LMAN1	1
ENSG00000143013	LMO4	1
ENSG00000113441	LNPEP	1
ENSG00000165714	LOH12CR1	1
ENSG00000198121	LPAR1	1
ENSG00000147145	LPAR4	1
ENSG00000123684	LPGAT1	1
ENSG00000121207	LRAT	1
ENSG00000136141	LRCH1	1
ENSG00000186001	LRCH3	1
ENSG00000120256	LRP11	1
ENSG00000162337	LRP5	1
ENSG00000100068	LRP5L	1
ENSG00000157193	LRP8	1
ENSG00000079691	LRRC16A	1
ENSG00000175489	LRRC25	1
ENSG00000174004	LRRC33	1
ENSG00000171488	LRRC8C	1
ENSG00000133739	LRRCC1	1
ENSG00000162620	LRRIQ3	1
ENSG00000198862	LTN1	1
ENSG00000139329	LUM	1
ENSG00000102021	LUZP4	1
ENSG00000054219	LY75	1
ENSG00000163155	LYSMD1	1
ENSG00000176018	LYSMD3	1
ENSG00000183060	LYSMD4	1
ENSG00000163818	LZTFL1	1
ENSG00000180660	MAB21L1	1
ENSG00000173212	MAB21L3	1
ENSG00000172264	MACROD2	1
ENSG00000197063	MAFG	1
ENSG00000176774	MAGEB18	1
ENSG00000120289	MAGEB4	1
ENSG00000186675	MAGEE2	1
ENSG00000081026	MAGI3	1
ENSG00000017621	MAGIX	1
ENSG00000102158	MAGT1	1
ENSG00000198042	MAK16	1
ENSG00000172175	MALT1	1
ENSG00000111885	MAN1A1	1
ENSG00000198162	MAN1A2	1
ENSG00000131711	MAP1B	1
ENSG00000140941	MAP1LC3B	1
ENSG00000169032	MAP2K1	1
ENSG00000108984	MAP2K6	1
ENSG00000139625	MAP3K12	1
ENSG00000073803	MAP3K13	1
ENSG00000180815	MAP3K15	1
ENSG00000085511	MAP3K4	1
ENSG00000135341	MAP3K7	1
ENSG00000071054	MAP4K4	1
ENSG00000135525	MAP7	1
ENSG00000164114	MAP9	1
ENSG00000141639	MAPK4	1
ENSG00000069956	MAPK6	1
ENSG00000119487	MAPKAP1	1
ENSG00000101367	MAPRE1	1
ENSG00000186868	MAPT	1
ENSG00000152939	MARVELD2	1
ENSG00000129071	MBD4	1
ENSG00000151332	MBIP	1
ENSG00000176055	MBLAC2	1
ENSG00000152601	MBNL1	1
ENSG00000076770	MBNL3	1
ENSG00000012174	MBTPS2	1
ENSG00000171444	MCC	1
ENSG00000124370	MCEE	1
ENSG00000180398	MCFD2	1
ENSG00000065328	MCM10	1
ENSG00000175471	MCTP1	1
ENSG00000135272	MDFIC	1
ENSG00000138400	MDH1B	1
ENSG00000111554	MDM1	1
ENSG00000065833	ME1	1
ENSG00000169057	MECP2	1
ENSG00000184634	MED12	1
ENSG00000136146	MED4	1
ENSG00000068305	MEF2A	1
ENSG00000145794	MEGF10	1
ENSG00000106780	MEGF9	1
ENSG00000133895	MEN1	1
ENSG00000169519	METTL15	1
ENSG00000101574	METTL4	1
ENSG00000197614	MFAP5	1
ENSG00000171109	MFN1	1
ENSG00000118855	MFSD1	1
ENSG00000151690	MFSD6	1
ENSG00000174197	MGA	1
ENSG00000182050	MGAT4C	1
ENSG00000154305	MIA3	1
ENSG00000101752	MIB1	1
ENSG00000133808	MICALCL	1
ENSG00000101871	MID1	1
ENSG00000141741	MIEN1	1
ENSG00000198160	MIER1	1
ENSG00000155545	MIER3	1
ENSG00000107789	MINPP1	1
ENSG00000159055	MIS18A	1
ENSG00000186260	MKL2	1
ENSG00000128585	MKLN1	1
ENSG00000179455	MKRN3	1
ENSG00000120215	MLANA	1
ENSG00000151725	MLF1IP	1
ENSG00000171843	MLLT3	1
ENSG00000108788	MLX	1
ENSG00000151611	MMAA	1
ENSG00000196549	MME	1
ENSG00000137745	MMP13	1
ENSG00000156103	MMP16	1
ENSG00000130675	MNX1	1
ENSG00000114978	MOB1A	1
ENSG00000173542	MOB1B	1
ENSG00000115540	MOB4	1
ENSG00000164172	MOCS2	1
ENSG00000061987	MON2	1
ENSG00000101928	MOSPD1	1
ENSG00000079931	MOXD1	1
ENSG00000135698	MPHOSPH6	1
ENSG00000150054	MPP7	1
ENSG00000154889	MPPE1	1
ENSG00000160588	MPZL3	1
ENSG00000115364	MRPL19	1
ENSG00000136897	MRPL50	1
ENSG00000175110	MRPS22	1
ENSG00000112996	MRPS30	1
ENSG00000156738	MS4A1	1
ENSG00000166927	MS4A7	1
ENSG00000066697	MSANTD3	1
ENSG00000057468	MSH4	1
ENSG00000135097	MSI1	1
ENSG00000138294	MSMB	1
ENSG00000186715	MST1P9	1
ENSG00000138379	MSTN	1
ENSG00000163132	MSX1	1
ENSG00000109919	MTCH2	1
ENSG00000127989	MTERF	1
ENSG00000065911	MTHFD2	1
ENSG00000132749	MTL5	1
ENSG00000171100	MTM1	1
ENSG00000166912	MTMR10	1
ENSG00000150712	MTMR12	1
ENSG00000105887	MTPN	1
ENSG00000116984	MTR	1
ENSG00000120662	MTRF1	1
ENSG00000124275	MTRR	1
ENSG00000170681	MURC	1
ENSG00000120279	MYCT1	1
ENSG00000041515	MYO16	1
ENSG00000128641	MYO1B	1
ENSG00000095777	MYO3A	1
ENSG00000167306	MYO5B	1
ENSG00000128833	MYO5C	1
ENSG00000120729	MYOT	1
ENSG00000176182	MYPOP	1
ENSG00000186487	MYT1L	1
ENSG00000204899	MZT1	1
ENSG00000102921	N4BP1	1
ENSG00000139597	N4BP2L1	1
ENSG00000172766	NAA16	1
ENSG00000111300	NAA25	1
ENSG00000110583	NAA40	1
ENSG00000166886	NAB2	1
ENSG00000152620	NADKD1	1
ENSG00000188613	NANOS1	1
ENSG00000134440	NARS	1
ENSG00000134369	NAV1	1
ENSG00000163386	NBPF10	1
ENSG00000152042	NBPF11	1
ENSG00000186275	NBPF12	1
ENSG00000203827	NBPF16	1
ENSG00000203832	NBPF20	1
ENSG00000203836	NBPF24	1
ENSG00000142794	NBPF3	1
ENSG00000168614	NBPF9	1
ENSG00000104490	NCALD	1
ENSG00000154654	NCAM2	1
ENSG00000151503	NCAPD3	1
ENSG00000146918	NCAPG2	1
ENSG00000111912	NCOA7	1
ENSG00000166579	NDEL1	1
ENSG00000164100	NDST3	1
ENSG00000128609	NDUFA5	1
ENSG00000123545	NDUFAF4	1
ENSG00000101247	NDUFAF5	1
ENSG00000123119	NECAB1	1
ENSG00000157191	NECAP2	1
ENSG00000139350	NEDD1	1
ENSG00000069869	NEDD4	1
ENSG00000172260	NEGR1	1
ENSG00000165973	NELL1	1
ENSG00000067141	NEO1	1
ENSG00000173848	NET1	1
ENSG00000171208	NETO2	1
ENSG00000178403	NEUROG2	1
ENSG00000162614	NEXN	1
ENSG00000100968	NFATC4	1
ENSG00000100906	NFKBIA	1
ENSG00000170448	NFXL1	1
ENSG00000188158	NHS	1
ENSG00000087303	NID2	1
ENSG00000170113	NIPA1	1
ENSG00000140157	NIPA2	1
ENSG00000163293	NIPAL1	1
ENSG00000164190	NIPBL	1
ENSG00000136783	NIPSNAP3A	1
ENSG00000165028	NIPSNAP3B	1
ENSG00000140807	NKD1	1
ENSG00000114857	NKTR	1
ENSG00000109705	NKX3-2	1
ENSG00000165246	NLGN4Y	1
ENSG00000087095	NLK	1
ENSG00000123213	NLN	1
ENSG00000169251	NMD3	1
ENSG00000112992	NNT	1
ENSG00000141101	NOB1	1
ENSG00000188976	NOC2L	1
ENSG00000146909	NOM1	1
ENSG00000103512	NOMO1	1
ENSG00000185164	NOMO2	1
ENSG00000164867	NOS3	1
ENSG00000074181	NOTCH3	1
ENSG00000136999	NOV	1
ENSG00000144061	NPHP1	1
ENSG00000135838	NPL	1
ENSG00000168743	NPNT	1
ENSG00000156642	NPTN	1
ENSG00000126368	NR1D1	1
ENSG00000120798	NR2C1	1
ENSG00000113580	NR3C1	1
ENSG00000123358	NR4A1	1
ENSG00000119508	NR4A3	1
ENSG00000148200	NR6A1	1
ENSG00000148572	NRBF2	1
ENSG00000185737	NRG3	1
ENSG00000099250	NRP1	1
ENSG00000179915	NRXN1	1
ENSG00000088833	NSFL1C	1
ENSG00000126653	NSRP1	1
ENSG00000037474	NSUN2	1
ENSG00000178694	NSUN3	1
ENSG00000122643	NT5C3	1
ENSG00000111696	NT5DC3	1
ENSG00000185652	NTF3	1
ENSG00000162631	NTNG1	1
ENSG00000196358	NTNG2	1
ENSG00000198400	NTRK1	1
ENSG00000133636	NTS	1
ENSG00000069275	NUCKS1	1
ENSG00000120526	NUDCD1	1
ENSG00000112874	NUDT12	1
ENSG00000143228	NUF2	1
ENSG00000083635	NUFIP1	1
ENSG00000124789	NUP153	1
ENSG00000113569	NUP155	1
ENSG00000030066	NUP160	1
ENSG00000108559	NUP88	1
ENSG00000130045	NXNL2	1
ENSG00000101888	NXT2	1
ENSG00000104904	OAZ1	1
ENSG00000197822	OCLN	1
ENSG00000149256	ODZ4	1
ENSG00000087263	OGFOD1	1
ENSG00000116774	OLFML3	1
ENSG00000205927	OLIG2	1
ENSG00000177468	OLIG3	1
ENSG00000127083	OMD	1
ENSG00000079482	OPHN1	1
ENSG00000204694	OR11A1	1
ENSG00000196242	OR2C3	1
ENSG00000181023	OR56B1	1
ENSG00000115947	ORC4	1
ENSG00000128699	ORMDL1	1
ENSG00000091039	OSBPL8	1
ENSG00000128694	OSGEPL1	1
ENSG00000164823	OSGIN2	1
ENSG00000099985	OSM	1
ENSG00000081087	OSTM1	1
ENSG00000165899	OTOGL	1
ENSG00000089723	OTUB2	1
ENSG00000165312	OTUD1	1
ENSG00000164164	OTUD4	1
ENSG00000163113	OTUD7B	1
ENSG00000172939	OXSR1	1
ENSG00000180914	OXTR	1
ENSG00000083454	P2RX5	1
ENSG00000181631	P2RY13	1
ENSG00000163138	PACRGL	1
ENSG00000129116	PALLD	1
ENSG00000152520	PAN3	1
ENSG00000124171	PARD6B	1
ENSG00000178184	PARD6G	1
ENSG00000111224	PARP11	1
ENSG00000151883	PARP8	1
ENSG00000106331	PAX4	1
ENSG00000007372	PAX6	1
ENSG00000168078	PBK	1
ENSG00000156453	PCDH1	1
ENSG00000102290	PCDH11X	1
ENSG00000120328	PCDHB12	1
ENSG00000081818	PCDHB4	1
ENSG00000113209	PCDHB5	1
ENSG00000081853	PCDHGA2	1
ENSG00000185619	PCGF3	1
ENSG00000186472	PCLO	1
ENSG00000175426	PCSK1	1
ENSG00000112541	PDE10A	1
ENSG00000174840	PDE12	1
ENSG00000172572	PDE3A	1
ENSG00000184588	PDE4B	1
ENSG00000178104	PDE4DIP	1
ENSG00000138735	PDE5A	1
ENSG00000131828	PDHA1	1
ENSG00000175087	PDIK1L	1
ENSG00000004799	PDK4	1
ENSG00000163110	PDLIM5	1
ENSG00000172840	PDP2	1
ENSG00000162493	PDPN	1
ENSG00000131779	PEX11B	1
ENSG00000114757	PEX5L	1
ENSG00000197121	PGAP1	1
ENSG00000102144	PGK1	1
ENSG00000169299	PGM2	1
ENSG00000165434	PGM2L1	1
ENSG00000013375	PGM3	1
ENSG00000112419	PHACTR2	1
ENSG00000130024	PHF10	1
ENSG00000109118	PHF12	1
ENSG00000129292	PHF20L1	1
ENSG00000040199	PHLPP2	1
ENSG00000165443	PHYHIPL	1
ENSG00000073921	PICALM	1
ENSG00000153823	PID1	1
ENSG00000151665	PIGF	1
ENSG00000143315	PIGM	1
ENSG00000080572	PIH1D3	1
ENSG00000105851	PIK3CG	1
ENSG00000100100	PIK3IP1	1
ENSG00000115020	PIKFYVE	1
ENSG00000125207	PIWIL1	1
ENSG00000198961	PJA2	1
ENSG00000158683	PKD1L1	1
ENSG00000078795	PKD2L2	1
ENSG00000170927	PKHD1	1
ENSG00000205038	PKHD1L1	1
ENSG00000135549	PKIB	1
ENSG00000065243	PKN2	1
ENSG00000057294	PKP2	1
ENSG00000159337	PLA2G4D	1
ENSG00000137055	PLAA	1
ENSG00000145287	PLAC8	1
ENSG00000181690	PLAG1	1
ENSG00000126003	PLAGL2	1
ENSG00000137841	PLCB2	1
ENSG00000149527	PLCH2	1
ENSG00000182836	PLCXD3	1
ENSG00000075651	PLD1	1
ENSG00000180287	PLD5	1
ENSG00000115956	PLEK	1
ENSG00000107679	PLEKHA1	1
ENSG00000166689	PLEKHA7	1
ENSG00000175895	PLEKHF2	1
ENSG00000152527	PLEKHH2	1
ENSG00000145632	PLK2	1
ENSG00000173846	PLK3	1
ENSG00000198523	PLN	1
ENSG00000124225	PMEPA1	1
ENSG00000105819	PMPCB	1
ENSG00000115946	PNO1	1
ENSG00000177666	PNPLA2	1
ENSG00000138035	PNPT1	1
ENSG00000152359	POC5	1
ENSG00000143157	POGK	1
ENSG00000140521	POLG	1
ENSG00000132664	POLR3F	1
ENSG00000196313	POM121	1
ENSG00000135213	POM121C	1
ENSG00000187537	POTEM	1
ENSG00000185668	POU3F1	1
ENSG00000151615	POU4F2	1
ENSG00000205808	PPAPDC2	1
ENSG00000128059	PPAT	1
ENSG00000156194	PPEF2	1
ENSG00000131626	PPFIA1	1
ENSG00000110841	PPFIBP1	1
ENSG00000198161	PPIAL4C	1
ENSG00000168781	PPIP5K1	1
ENSG00000145725	PPIP5K2	1
ENSG00000198729	PPP1R14C	1
ENSG00000087074	PPP1R15A	1
ENSG00000158615	PPP1R15B	1
ENSG00000150722	PPP1R1C	1
ENSG00000154415	PPP1R3A	1
ENSG00000132825	PPP1R3D	1
ENSG00000049769	PPP1R3F	1
ENSG00000167393	PPP2R3B	1
ENSG00000154001	PPP2R5E	1
ENSG00000154845	PPP4R1	1
ENSG00000119698	PPP4R4	1
ENSG00000119414	PPP6C	1
ENSG00000196850	PPTC7	1
ENSG00000204491	PRAMEF18	1
ENSG00000204480	PRAMEF19	1
ENSG00000204503	PRAMEF3	1
ENSG00000198901	PRC1	1
ENSG00000057657	PRDM1	1
ENSG00000170325	PRDM10	1
ENSG00000130711	PRDM12	1
ENSG00000116731	PRDM2	1
ENSG00000116690	PRG4	1
ENSG00000163637	PRICKLE2	1
ENSG00000132356	PRKAA1	1
ENSG00000108946	PRKAR1A	1
ENSG00000005249	PRKAR2B	1
ENSG00000027075	PRKCH	1
ENSG00000113494	PRLR	1
ENSG00000171864	PRND	1
ENSG00000163421	PROK2	1
ENSG00000184500	PROS1	1
ENSG00000165630	PRPF18	1
ENSG00000112739	PRPF4B	1
ENSG00000141127	PRPSAP2	1
ENSG00000126464	PRR12	1
ENSG00000183530	PRR14L	1
ENSG00000176532	PRR15	1
ENSG00000150687	PRSS23	1
ENSG00000172382	PRSS27	1
ENSG00000146250	PRSS35	1
ENSG00000135069	PSAT1	1
ENSG00000156011	PSD3	1
ENSG00000159792	PSKH1	1
ENSG00000131470	PSMC3IP	1
ENSG00000101843	PSMD10	1
ENSG00000152229	PSTPIP2	1
ENSG00000188647	PTAR1	1
ENSG00000011304	PTBP1	1
ENSG00000119314	PTBP3	1
ENSG00000171862	PTEN	1
ENSG00000165983	PTER	1
ENSG00000171522	PTGER4	1
ENSG00000110958	PTGES3	1
ENSG00000169398	PTK2	1
ENSG00000187514	PTMA	1
ENSG00000165996	PTPLA	1
ENSG00000206527	PTPLB	1
ENSG00000163629	PTPN13	1
ENSG00000127329	PTPRB	1
ENSG00000081237	PTPRC	1
ENSG00000153707	PTPRD	1
ENSG00000152894	PTPRK	1
ENSG00000106278	PTPRZ1	1
ENSG00000150787	PTS	1
ENSG00000112531	QKI	1
ENSG00000198218	QRICH1	1
ENSG00000116260	QSOX1	1
ENSG00000151576	QTRTD1	1
ENSG00000103769	RAB11A	1
ENSG00000107560	RAB11FIP2	1
ENSG00000099246	RAB18	1
ENSG00000138069	RAB1A	1
ENSG00000172007	RAB33B	1
ENSG00000155961	RAB39B	1
ENSG00000152932	RAB3C	1
ENSG00000197562	RAB40C	1
ENSG00000123595	RAB9A	1
ENSG00000011454	RABGAP1	1
ENSG00000152061	RABGAP1L	1
ENSG00000070950	RAD18	1
ENSG00000111247	RAD51AP1	1
ENSG00000108384	RAD51C	1
ENSG00000197275	RAD54B	1
ENSG00000157927	RADIL	1
ENSG00000155918	RAET1L	1
ENSG00000017797	RALBP1	1
ENSG00000174373	RALGAPA1	1
ENSG00000010017	RANBP9	1
ENSG00000116473	RAP1A	1
ENSG00000123728	RAP2C	1
ENSG00000172575	RASGRP1	1
ENSG00000023287	RB1CC1	1
ENSG00000146587	RBAK	1
ENSG00000117222	RBBP5	1
ENSG00000103479	RBL2	1
ENSG00000185272	RBM11	1
ENSG00000139746	RBM26	1
ENSG00000131051	RBM39	1
ENSG00000177483	RBM44	1
ENSG00000165476	REEP3	1
ENSG00000134533	RERG	1
ENSG00000084093	REST	1
ENSG00000133119	RFC3	1
ENSG00000135002	RFK	1
ENSG00000080298	RFX3	1
ENSG00000143390	RFX5	1
ENSG00000182175	RGMA	1
ENSG00000187627	RGPD1	1
ENSG00000185304	RGPD2	1
ENSG00000015568	RGPD5	1
ENSG00000183054	RGPD6	1
ENSG00000169629	RGPD8	1
ENSG00000127074	RGS13	1
ENSG00000147509	RGS20	1
ENSG00000117152	RGS4	1
ENSG00000168421	RHOH	1
ENSG00000116574	RHOU	1
ENSG00000131941	RHPN2	1
ENSG00000080345	RIF1	1
ENSG00000187994	RINL	1
ENSG00000058729	RIOK2	1
ENSG00000101782	RIOK3	1
ENSG00000104312	RIPK2	1
ENSG00000143622	RIT1	1
ENSG00000178966	RMI1	1
ENSG00000157450	RNF111	1
ENSG00000137522	RNF121	1
ENSG00000134758	RNF138	1
ENSG00000013561	RNF14	1
ENSG00000163162	RNF149	1
ENSG00000180537	RNF182	1
ENSG00000121481	RNF2	1
ENSG00000152193	RNF219	1
ENSG00000108375	RNF43	1
ENSG00000111880	RNGTT	1
ENSG00000184719	RNLS	1
ENSG00000134318	ROCK2	1
ENSG00000185483	ROR1	1
ENSG00000129197	RPAIN	1
ENSG00000116745	RPE65	1
ENSG00000144713	RPL32	1
ENSG00000145592	RPL37	1
ENSG00000141425	RPRD1A	1
ENSG00000163125	RPRD2	1
ENSG00000141564	RPTOR	1
ENSG00000116954	RRAGC	1
ENSG00000171848	RRM2	1
ENSG00000067533	RRP15	1
ENSG00000136444	RSAD1	1
ENSG00000081019	RSBN1	1
ENSG00000182010	RTKN2	1
ENSG00000105784	RUNDC3B	1
ENSG00000124813	RUNX2	1
ENSG00000160753	RUSC1	1
ENSG00000182552	RWDD4	1
ENSG00000171509	RXFP1	1
ENSG00000163602	RYBP	1
ENSG00000203943	SAMD13	1
ENSG00000155307	SAMSN1	1
ENSG00000111961	SASH1	1
ENSG00000156876	SASS6	1
ENSG00000119042	SATB2	1
ENSG00000151748	SAV1	1
ENSG00000173611	SCAI	1
ENSG00000140386	SCAPER	1
ENSG00000074660	SCARF1	1
ENSG00000171951	SCG2	1
ENSG00000047634	SCML1	1
ENSG00000183873	SCN5A	1
ENSG00000153130	SCOC	1
ENSG00000144306	SCRN3	1
ENSG00000170616	SCRT1	1
ENSG00000136021	SCYL2	1
ENSG00000168497	SDPR	1
ENSG00000121542	SEC22A	1
ENSG00000138802	SEC24B	1
ENSG00000008952	SEC62	1
ENSG00000174175	SELP	1
ENSG00000075223	SEMA3C	1
ENSG00000170381	SEMA3E	1
ENSG00000086475	SEPHS1	1
ENSG00000109618	SEPSECS	1
ENSG00000142864	SERBP1	1
ENSG00000111897	SERINC1	1
ENSG00000132824	SERINC3	1
ENSG00000140093	SERPINA10	1
ENSG00000197632	SERPINB2	1
ENSG00000206075	SERPINB5	1
ENSG00000170542	SERPINB9	1
ENSG00000106366	SERPINE1	1
ENSG00000163536	SERPINI1	1
ENSG00000082497	SERTAD4	1
ENSG00000180440	SERTM1	1
ENSG00000139718	SETD1B	1
ENSG00000103037	SETD6	1
ENSG00000155542	SETD9	1
ENSG00000198879	SFMBT2	1
ENSG00000168878	SFTPB	1
ENSG00000164466	SFXN1	1
ENSG00000170624	SGCD	1
ENSG00000104205	SGK3	1
ENSG00000198964	SGMS1	1
ENSG00000126821	SGPP1	1
ENSG00000197860	SGTB	1
ENSG00000183918	SH2D1A	1
ENSG00000107957	SH3PXD2A	1
ENSG00000154447	SH3RF1	1
ENSG00000107338	SHB	1
ENSG00000148082	SHC3	1
ENSG00000171241	SHCBP1	1
ENSG00000169291	SHE	1
ENSG00000108061	SHOC2	1
ENSG00000146414	SHPRH	1
ENSG00000138771	SHROOM3	1
ENSG00000196470	SIAH1	1
ENSG00000105366	SIGLEC8	1
ENSG00000101307	SIRPB1	1
ENSG00000182628	SKA2	1
ENSG00000005020	SKAP2	1
ENSG00000157933	SKI	1
ENSG00000109171	SLAIN2	1
ENSG00000026751	SLAMF7	1
ENSG00000125255	SLC10A2	1
ENSG00000120519	SLC10A7	1
ENSG00000110911	SLC11A2	1
ENSG00000081800	SLC13A1	1
ENSG00000155380	SLC16A1	1
ENSG00000152779	SLC16A12	1
ENSG00000163053	SLC16A14	1
ENSG00000165449	SLC16A9	1
ENSG00000119899	SLC17A5	1
ENSG00000179520	SLC17A8	1
ENSG00000036565	SLC18A1	1
ENSG00000165646	SLC18A2	1
ENSG00000117479	SLC19A2	1
ENSG00000135917	SLC19A3	1
ENSG00000106688	SLC1A1	1
ENSG00000197658	SLC22A24	1
ENSG00000122912	SLC25A16	1
ENSG00000100372	SLC25A17	1
ENSG00000085491	SLC25A24	1
ENSG00000174032	SLC25A30	1
ENSG00000151475	SLC25A31	1
ENSG00000151729	SLC25A4	1
ENSG00000176274	SLC25A53	1
ENSG00000181045	SLC26A11	1
ENSG00000117394	SLC2A1	1
ENSG00000163581	SLC2A2	1
ENSG00000196660	SLC30A10	1
ENSG00000145740	SLC30A5	1
ENSG00000152683	SLC30A6	1
ENSG00000014824	SLC30A9	1
ENSG00000117620	SLC35A3	1
ENSG00000138459	SLC35A5	1
ENSG00000116704	SLC35D1	1
ENSG00000182747	SLC35D3	1
ENSG00000176273	SLC35G1	1
ENSG00000123643	SLC36A1	1
ENSG00000139209	SLC38A4	1
ENSG00000196950	SLC39A10	1
ENSG00000104635	SLC39A14	1
ENSG00000133065	SLC41A1	1
ENSG00000137968	SLC44A5	1
ENSG00000198743	SLC5A3	1
ENSG00000157103	SLC6A1	1
ENSG00000072041	SLC6A15	1
ENSG00000115616	SLC9A2	1
ENSG00000139155	SLCO1C1	1
ENSG00000172716	SLFN11	1
ENSG00000154760	SLFN13	1
ENSG00000121871	SLITRK3	1
ENSG00000065613	SLK	1
ENSG00000175387	SMAD2	1
ENSG00000166949	SMAD3	1
ENSG00000137834	SMAD6	1
ENSG00000163104	SMARCAD1	1
ENSG00000163029	SMC6	1
ENSG00000100335	SMCR7L	1
ENSG00000188176	SMTNL2	1
ENSG00000198742	SMURF1	1
ENSG00000099940	SNAP29	1
ENSG00000184602	SNN	1
ENSG00000163788	SNRK	1
ENSG00000100603	SNW1	1
ENSG00000086300	SNX10	1
ENSG00000104497	SNX16	1
ENSG00000109762	SNX25	1
ENSG00000148158	SNX30	1
ENSG00000112320	SOBP	1
ENSG00000184557	SOCS3	1
ENSG00000170677	SOCS6	1
ENSG00000112096	SOD2	1
ENSG00000167941	SOST	1
ENSG00000176887	SOX11	1
ENSG00000203883	SOX18	1
ENSG00000110693	SOX6	1
ENSG00000171056	SOX7	1
ENSG00000185591	SP1	1
ENSG00000113140	SPARC	1
ENSG00000182957	SPATA13	1
ENSG00000162814	SPATA17	1
ENSG00000114902	SPCS1	1
ENSG00000118363	SPCS2	1
ENSG00000100014	SPECC1L	1
ENSG00000204991	SPIRE2	1
ENSG00000196104	SPOCK3	1
ENSG00000121067	SPOP	1
ENSG00000164056	SPRY1	1
ENSG00000168939	SPRY3	1
ENSG00000187678	SPRY4	1
ENSG00000123178	SPRYD7	1
ENSG00000172296	SPTLC3	1
ENSG00000165389	SPTSSA	1
ENSG00000179119	SPTY2D1	1
ENSG00000128039	SRD5A3	1
ENSG00000153914	SREK1	1
ENSG00000153006	SREK1IP1	1
ENSG00000151304	SRFBP1	1
ENSG00000075142	SRI	1
ENSG00000188529	SRSF10	1
ENSG00000116754	SRSF11	1
ENSG00000141380	SS18	1
ENSG00000114850	SSR3	1
ENSG00000117155	SSX2IP	1
ENSG00000100380	ST13	1
ENSG00000007341	ST7L	1
ENSG00000111728	ST8SIA1	1
ENSG00000101638	ST8SIA5	1
ENSG00000144681	STAC	1
ENSG00000101972	STAG2	1
ENSG00000172345	STARD5	1
ENSG00000159433	STARD9	1
ENSG00000168610	STAT3	1
ENSG00000040341	STAU2	1
ENSG00000113739	STC2	1
ENSG00000157214	STEAP2	1
ENSG00000167323	STIM1	1
ENSG00000109689	STIM2	1
ENSG00000164543	STK17A	1
ENSG00000081320	STK17B	1
ENSG00000152953	STK32B	1
ENSG00000198648	STK39	1
ENSG00000101109	STK4	1
ENSG00000115808	STRN	1
ENSG00000196792	STRN3	1
ENSG00000101846	STS	1
ENSG00000135604	STX11	1
ENSG00000117758	STX12	1
ENSG00000135823	STX6	1
ENSG00000079950	STX7	1
ENSG00000136854	STXBP1	1
ENSG00000145087	STXBP5L	1
ENSG00000172340	SUCLG2	1
ENSG00000111707	SUDS3	1
ENSG00000130540	SULT4A1	1
ENSG00000143502	SUSD4	1
ENSG00000173705	SUSD5	1
ENSG00000159164	SV2A	1
ENSG00000165124	SVEP1	1
ENSG00000197321	SVIL	1
ENSG00000198168	SVIP	1
ENSG00000116668	SWT1	1
ENSG00000196074	SYCP2	1
ENSG00000067715	SYT1	1
ENSG00000143469	SYT14	1
ENSG00000132872	SYT4	1
ENSG00000102362	SYTL4	1
ENSG00000147041	SYTL5	1
ENSG00000055208	TAB2	1
ENSG00000157625	TAB3	1
ENSG00000147133	TAF1	1
ENSG00000165632	TAF3	1
ENSG00000137413	TAF8	1
ENSG00000168394	TAP1	1
ENSG00000198650	TAT	1
ENSG00000132405	TBC1D14	1
ENSG00000065491	TBC1D22B	1
ENSG00000133138	TBC1D8B	1
ENSG00000183735	TBK1	1
ENSG00000112592	TBP	1
ENSG00000028839	TBPL1	1
ENSG00000154144	TBRG1	1
ENSG00000122145	TBX22	1
ENSG00000179152	TCAIM	1
ENSG00000172465	TCEAL1	1
ENSG00000176896	TCEANC	1
ENSG00000011007	TCEB3	1
ENSG00000100207	TCF20	1
ENSG00000101190	TCFL5	1
ENSG00000120438	TCP1	1
ENSG00000156414	TDRD9	1
ENSG00000196663	TECPR2	1
ENSG00000135269	TES	1
ENSG00000107140	TESK1	1
ENSG00000070759	TESK2	1
ENSG00000168769	TET2	1
ENSG00000187605	TET3	1
ENSG00000151287	TEX30	1
ENSG00000108064	TFAM	1
ENSG00000105967	TFEC	1
ENSG00000003436	TFPI	1
ENSG00000105825	TFPI2	1
ENSG00000072274	TFRC	1
ENSG00000088451	TGDS	1
ENSG00000163235	TGFA	1
ENSG00000069702	TGFBR3	1
ENSG00000152291	TGOLN2	1
ENSG00000105549	THEG	1
ENSG00000172673	THEMIS	1
ENSG00000100296	THOC5	1
ENSG00000151090	THRB	1
ENSG00000136114	THSD1	1
ENSG00000144229	THSD7B	1
ENSG00000146426	TIAM2	1
ENSG00000035862	TIMP2	1
ENSG00000142910	TINAGL1	1
ENSG00000106829	TLE4	1
ENSG00000174123	TLR10	1
ENSG00000164342	TLR3	1
ENSG00000136869	TLR4	1
ENSG00000101916	TLR8	1
ENSG00000169490	TM2D2	1
ENSG00000169908	TM4SF1	1
ENSG00000198498	TMA16	1
ENSG00000117500	TMED5	1
ENSG00000184988	TMEM106A	1
ENSG00000106460	TMEM106B	1
ENSG00000164180	TMEM161B	1
ENSG00000157600	TMEM164	1
ENSG00000174695	TMEM167A	1
ENSG00000151353	TMEM18	1
ENSG00000170417	TMEM182	1
ENSG00000163444	TMEM183A	1
ENSG00000164855	TMEM184A	1
ENSG00000164168	TMEM184C	1
ENSG00000124208	TMEM189-UBE2V1	1
ENSG00000188807	TMEM201	1
ENSG00000065600	TMEM206	1
ENSG00000188133	TMEM215	1
ENSG00000106771	TMEM245	1
ENSG00000106609	TMEM248	1
ENSG00000112697	TMEM30A	1
ENSG00000126950	TMEM35	1
ENSG00000095209	TMEM38B	1
ENSG00000151715	TMEM45B	1
ENSG00000147027	TMEM47	1
ENSG00000118600	TMEM5	1
ENSG00000183726	TMEM50A	1
ENSG00000155099	TMEM55A	1
ENSG00000152078	TMEM56	1
ENSG00000204178	TMEM57	1
ENSG00000180694	TMEM64	1
ENSG00000164983	TMEM65	1
ENSG00000164953	TMEM67	1
ENSG00000167904	TMEM68	1
ENSG00000175348	TMEM9B	1
ENSG00000144747	TMF1	1
ENSG00000136842	TMOD1	1
ENSG00000185873	TMPRSS11B	1
ENSG00000154620	TMSB4Y	1
ENSG00000166479	TMX3	1
ENSG00000125827	TMX4	1
ENSG00000104689	TNFRSF10A	1
ENSG00000006327	TNFRSF12A	1
ENSG00000107854	TNKS2	1
ENSG00000064419	TNPO3	1
ENSG00000136205	TNS3	1
ENSG00000078902	TOLLIP	1
ENSG00000141198	TOM1L1	1
ENSG00000131747	TOP2A	1
ENSG00000163781	TOPBP1	1
ENSG00000198846	TOX	1
ENSG00000146242	TPBG	1
ENSG00000186815	TPCN1	1
ENSG00000076554	TPD52	1
ENSG00000139287	TPH2	1
ENSG00000140416	TPM1	1
ENSG00000188001	TPRG1	1
ENSG00000166157	TPTE	1
ENSG00000132958	TPTE2	1
ENSG00000056972	TRAF3IP2	1
ENSG00000082512	TRAF5	1
ENSG00000182606	TRAK1	1
ENSG00000115993	TRAK2	1
ENSG00000067167	TRAM1	1
ENSG00000160218	TRAPPC10	1
ENSG00000196459	TRAPPC2	1
ENSG00000182400	TRAPPC6B	1
ENSG00000153339	TRAPPC8	1
ENSG00000124496	TRERF1	1
ENSG00000071575	TRIB2	1
ENSG00000113595	TRIM23	1
ENSG00000197323	TRIM33	1
ENSG00000104228	TRIM35	1
ENSG00000152503	TRIM36	1
ENSG00000204614	TRIM40	1
ENSG00000172524	TRIM40	1
ENSG00000132256	TRIM5	1
ENSG00000100505	TRIM9	1
ENSG00000145331	TRMT10A	1
ENSG00000066651	TRMT11	1
ENSG00000122435	TRMT13	1
ENSG00000126814	TRMT5	1
ENSG00000144935	TRPC1	1
ENSG00000083067	TRPM3	1
ENSG00000119121	TRPM6	1
ENSG00000092439	TRPM7	1
ENSG00000144481	TRPM8	1
ENSG00000196428	TSC22D2	1
ENSG00000123297	TSFM	1
ENSG00000135951	TSGA10	1
ENSG00000179981	TSHZ1	1
ENSG00000182463	TSHZ2	1
ENSG00000145777	TSLP	1
ENSG00000116918	TSNAX	1
ENSG00000128881	TTBK2	1
ENSG00000183891	TTC32	1
ENSG00000113638	TTC33	1
ENSG00000085831	TTC39A	1
ENSG00000165914	TTC7B	1
ENSG00000162222	TTC9C	1
ENSG00000125482	TTF1	1
ENSG00000101407	TTI1	1
ENSG00000155657	TTN	1
ENSG00000074935	TUBE1	1
ENSG00000126216	TUBGCP3	1
ENSG00000143367	TUFT1	1
ENSG00000128791	TWSG1	1
ENSG00000164440	TXLNB	1
ENSG00000086712	TXLNG	1
ENSG00000115514	TXNDC9	1
ENSG00000162971	TYW5	1
ENSG00000163714	U2SURP	1
ENSG00000137831	UACA	1
ENSG00000117143	UAP1	1
ENSG00000072401	UBE2D1	1
ENSG00000109332	UBE2D3	1
ENSG00000184787	UBE2G2	1
ENSG00000160714	UBE2Q1	1
ENSG00000169139	UBE2V2	1
ENSG00000122042	UBL3	1
ENSG00000188021	UBQLN2	1
ENSG00000144224	UBXN4	1
ENSG00000163960	UBXN7	1
ENSG00000070010	UFD1L	1
ENSG00000014123	UFL1	1
ENSG00000148154	UGCG	1
ENSG00000109814	UGDH	1
ENSG00000065060	UHRF1BP1	1
ENSG00000111647	UHRF1BP1L	1
ENSG00000147854	UHRF2	1
ENSG00000111981	ULBP1	1
ENSG00000131015	ULBP2	1
ENSG00000114491	UMPS	1
ENSG00000137766	UNC13C	1
ENSG00000141161	UNC45B	1
ENSG00000007001	UPP2	1
ENSG00000042781	USH2A	1
ENSG00000152484	USP12	1
ENSG00000101557	USP14	1
ENSG00000184979	USP18	1
ENSG00000162402	USP24	1
ENSG00000155313	USP25	1
ENSG00000170832	USP32	1
ENSG00000077254	USP33	1
ENSG00000090686	USP48	1
ENSG00000129204	USP6	1
ENSG00000132952	USPL1	1
ENSG00000111962	UST	1
ENSG00000115652	UXS1	1
ENSG00000124333	VAMP7	1
ENSG00000101558	VAPA	1
ENSG00000143494	VASH2	1
ENSG00000168140	VASN	1
ENSG00000148704	VAX1	1
ENSG00000175073	VCPIP1	1
ENSG00000151650	VENTX	1
ENSG00000206538	VGLL3	1
ENSG00000147852	VLDLR	1
ENSG00000112299	VNN1	1
ENSG00000197969	VPS13A	1
ENSG00000132549	VPS13B	1
ENSG00000129003	VPS13C	1
ENSG00000122958	VPS26A	1
ENSG00000167987	VPS37C	1
ENSG00000119541	VPS4B	1
ENSG00000170419	VSTM2A	1
ENSG00000165633	VSTM4	1
ENSG00000100987	VSX1	1
ENSG00000102763	VWA8	1
ENSG00000062650	WAPAL	1
ENSG00000106299	WASL	1
ENSG00000138442	WDR12	1
ENSG00000162923	WDR26	1
ENSG00000148225	WDR31	1
ENSG00000118965	WDR35	1
ENSG00000134987	WDR36	1
ENSG00000141580	WDR45L	1
ENSG00000091157	WDR7	1
ENSG00000166415	WDR72	1
ENSG00000116455	WDR77	1
ENSG00000197748	WDR96	1
ENSG00000196151	WDSUB1	1
ENSG00000147548	WHSC1L1	1
ENSG00000115935	WIPF1	1
ENSG00000104415	WISP1	1
ENSG00000112761	WISP3	1
ENSG00000196632	WNK3	1
ENSG00000135925	WNT10A	1
ENSG00000085741	WNT11	1
ENSG00000002745	WNT16	1
ENSG00000188064	WNT7B	1
ENSG00000158955	WNT9B	1
ENSG00000143184	XCL1	1
ENSG00000047597	XK	1
ENSG00000136936	XPA	1
ENSG00000132953	XPO4	1
ENSG00000143324	XPR1	1
ENSG00000114127	XRN1	1
ENSG00000093217	XYLB	1
ENSG00000015153	YAF2	1
ENSG00000137693	YAP1	1
ENSG00000176105	YES1	1
ENSG00000181704	YIPF6	1
ENSG00000136758	YME1L1	1
ENSG00000180667	YOD1	1
ENSG00000175155	YPEL2	1
ENSG00000126804	ZBTB1	1
[truncated: 1,658 more rows]

## Sheet: TCGA-BREAST-upregulated
TCGA Breast
Gene Rank	Gene Name	Gene Symbol	Reporter ID	t-Test	P-value	Q-value	Fold Change
39	collagen, type X, alpha 1	COL10A1	A_23_P214144	35.0883	1.30785e-52	2.69133e-49	43.718
1	collagen, type XI, alpha 1	COL11A1	NM_080629_1_6174	33.9114	1.11137e-73	1.23499e-68	40.9063
4	gap junction protein, beta 2, 26kDa	GJB2	A_23_P204941	30.923	9.17671e-69	2.54936e-64	18.9657
7	matrix metallopeptidase 11 (stromelysin 3)	MMP11	A_23_P57420	40.8958	5.96033e-63	6.6233e-59	16.6335
21	matrix metallopeptidase 13 (collagenase 3)	MMP13	A_23_P138931	23.819	1.154e-56	4.57987e-53	14.1709
180	NIMA (never in mitosis gene a)-related kinase 2	NEK2	A_23_P35214	26.4075	2.49535e-41	9.833e-39	13.7287
15	phosphatidic acid phosphatase type 2 domain containing 1A	PPAPDC1A	A_24_P810284	28.4596	7.28319e-59	4.04665e-55	11.2925
34	matrix metallopeptidase 1 (interstitial collagenase)	MMP1	A_23_P1691	21.5445	2.15838e-53	4.89481e-50	11.2412
219	centrosomal protein 55kDa	CEP55	A_23_P115873	24.0899	1.12848e-39	3.54239e-37	10.8623
205	kinesin family member 14	KIF14	NKI_NM_014875	23.2732	4.37004e-40	1.45829e-37	10.4427
676	family with sequence similarity 111, member B	FAM111B	A_24_P332312	17.6625	2.16194e-29	1.82139e-27	10.2854
152	family with sequence similarity 83, member D	FAM83D	A_23_P323751	23.6347	2.41197e-42	1.15032e-39	10.2828
597	Na+/K+ transporting ATPase interacting 1	NKAIN1	A_23_P51376	14.9171	1.6086e-30	1.54764e-28	10.0292
167	budding uninhibited by benzimidazoles 1 homolog (yeast)	BUB1	NKI_NM_004336	25.034	8.38111e-42	3.62387e-39	9.95999
70	antigen identified by monoclonal antibody Ki-67	MKI67	A_23_P202232	26.0611	3.50527e-47	3.70968e-44	9.78279
129	NUF2, NDC80 kinetochore complex component, homolog (S. cerevisiae)	NUF2	A_23_P74351	25.3871	6.24709e-44	3.6156e-41	9.65197
8	TPX2, microtubule-associated, homolog (Xenopus laevis)	TPX2	A_23_P68608	33.5923	8.79894e-63	8.88877e-59	8.82614
134	topoisomerase (DNA) II alpha 170kDa	TOP2A	NM_001067_2_5468	25.1405	1.33071e-43	7.39365e-41	8.76807
227	asp (abnormal spindle) homolog, microcephaly associated (Drosophila)	ASPM	A_24_P911179	22.2847	2.63832e-39	7.86001e-37	8.66219
26	cyclin E2	CCNE2	NKI_NM_004702	28.8375	3.78156e-54	1.07748e-50	8.6469
311	KIAA1199	KIAA1199	A_32_P161855	19.0207	1.70854e-36	3.41472e-34	8.23289
837	contactin associated protein-like 2	CNTNAP2	A_23_P84399	13.8553	3.06902e-27	2.05693e-25	8.14068
174	centromere protein A	CENPA	NKI_NM_001809	23.1148	1.56945e-41	6.48336e-39	8.1289
250	S100 calcium binding protein P	S100P	A_23_P58266	17.4929	2.03754e-38	5.29013e-36	7.95514
59	inhibin, beta A	INHBA	A_23_P122924	26.8607	5.20111e-48	6.64325e-45	7.93357
29	maternal embryonic leucine zipper kinase	MELK	A_23_P94422	27.6507	4.59664e-54	1.21617e-50	7.9296
649	cancer susceptibility candidate 5	CASC5	A_23_P100127	18.4272	9.18209e-30	8.10438e-28	7.88825
137	effector cell peptidase receptor 1 (non-protein coding)	EPR1	NKI_NM_001168*	24.0573	1.90926e-43	1.03494e-40	7.71872
246	budding uninhibited by benzimidazoles 1 homolog beta (yeast)	BUB1B	NM_001211_3_3511	23.2397	1.46111e-38	3.84746e-36	7.57977
275	tryptophan 2,3-dioxygenase	TDO2	A_23_P80976	20.2822	1.12294e-37	2.61603e-35	7.54211
329	kinesin family member 26B	KIF26B	A_23_P63538	21.2036	4.94976e-36	9.1825e-34	7.5192
208	E2F transcription factor 7	E2F7	A_23_P336178	22.127	6.41979e-40	2.10438e-37	7.4607
1333	carcinoembryonic antigen-related cell adhesion molecule 6 (non-specific cross reacting antigen)	CEACAM6	A_23_P218442	11.3445	5.13892e-22	2.05859e-20	7.36206
411	cytoskeleton associated protein 2-like	CKAP2L	A_23_P388812	19.5736	7.39275e-34	1.06138e-31	7.27839
257	discs, large (Drosophila) homolog-associated protein 5	DLGAP5	A_23_P88333	22.5001	3.04119e-38	7.69808e-36	7.1507
272	histone cluster 1, H3d	HIST1H3D	A_23_P219045	20.5652	1.00191e-37	2.35381e-35	7.12223
67	WNT1 inducible signaling pathway protein 1	WISP1	NKI_NM_003882	25.55	2.66639e-47	2.90488e-44	7.11303
1628	ADAM-like, decysin 1	ADAMDEC1	A_23_P256421	12.0015	5.64262e-20	1.78436e-18	7.02474
1174	protein phosphatase, EF-hand calcium binding domain 1	PPEF1	A_23_P125503	14.4515	3.21372e-23	1.45882e-21	6.99968
335	DEP domain containing 1	DEPDC1	NM_017779_1_2266	20.2137	1.08788e-35	1.95613e-33	6.99642
238	kinesin family member 18B	KIF18B	A_24_P680950	21.9754	7.70909e-39	2.13099e-36	6.85136
148	kinesin family member 2C	KIF2C	A_23_P34784	23.2124	1.49614e-42	7.2919e-40	6.80695
576	establishment of cohesion 1 homolog 2 (S. cerevisiae)	ESCO2	A_24_P323598	18.6038	8.79964e-31	8.76988e-29	6.73825
188	SPC25, NDC80 kinetochore complex component, homolog (S. cerevisiae)	SPC25	NM_020675_3_736	24.1814	5.72539e-41	2.1494e-38	6.72523
468	DEP domain containing 1B	DEPDC1B	A_23_P361414	19.3525	1.4082e-32	1.75037e-30	6.50401
738	cathelicidin antimicrobial peptide	CAMP	A_23_P253791	14.5581	1.50425e-28	1.15519e-26	6.49668
117	centromere protein F, 350/400ka (mitosin)	CENPF	NM_016343_2_9472	24.8751	2.49704e-44	1.54155e-41	6.49115
360	hyaluronan-mediated motility receptor (RHAMM)	HMMR	NM_012484_1_2547	21.2441	3.28241e-35	5.50983e-33	6.46943
25	kinesin family member 4A	KIF4A	A_23_P148474	29.8846	8.01609e-55	2.47437e-51	6.44287
115	RAD51 homolog (RecA homolog, E. coli) (S. cerevisiae)	RAD51	A_23_P88731	24.9534	1.93819e-44	1.21682e-41	6.41608
222	leucine rich repeat containing 15	LRRC15	A_24_P827032	19.3696	1.88198e-39	5.77711e-37	6.41543
252	kinesin family member 23	KIF23	A_23_P48836	22.6814	2.44444e-38	6.2733e-36	6.35197
262	family with sequence similarity 64, member A	FAM64A	NM_019013_1_1397	20.9787	5.34843e-38	1.32074e-35	6.28937
356	histone cluster 1, H1b	HIST1H1B	A_23_P250385	19.0898	2.53075e-35	4.31326e-33	6.18079
122	ZW10 interactor	ZWINT	A_23_P63790	25.4453	3.38871e-44	2.02454e-41	5.98522
120	kringle containing transmembrane protein 2	KREMEN2	A_23_P77612*	17.7865	2.81484e-44	1.69997e-41	5.96569
164	NDC80 homolog, kinetochore complex component (S. cerevisiae)	NDC80	A_23_P50108	23.0107	7.75001e-42	3.40397e-39	5.96502
547	chromosome 1 open reading frame 135	C1orf135	A_23_P160537	18.5828	4.16388e-31	4.36512e-29	5.95117
127	non-SMC condensin I complex, subunit G	NCAPG	A_23_P155816*	23.9934	5.59028e-44	3.2524e-41	5.89642
128	ligand dependent nuclear receptor corepressor-like	LCORL	A_23_P155816*	23.9934	5.59028e-44	3.2524e-41	5.89642
203	Opa interacting protein 5	OIP5	A_23_P379614	23.4573	3.44616e-40	1.16398e-37	5.86476
110	ubiquitin-conjugating enzyme E2T (putative)	UBE2T	NM_014176_1_723	24.9098	1.27378e-44	8.32626e-42	5.85917
65	cyclin-dependent kinase 1	CDK1	A_23_P138507	25.5839	1.95208e-47	2.19112e-44	5.85412
440	hydroxysteroid (17-beta) dehydrogenase 6 homolog (mouse)	HSD17B6	A_23_P25030	19.4483	3.1649e-33	4.21695e-31	5.83164
45	fibronectin 1	FN1	A_23_P308521	26.366	1.87699e-51	3.25901e-48	5.8008
545	chemokine (C-X-C motif) ligand 11	CXCL11	A_24_P20602	15.4717	3.64198e-31	3.84703e-29	5.79508
443	troponin T type 1 (skeletal, slow)	TNNT1	A_23_P56049	14.8972	3.46177e-33	4.5741e-31	5.79236
63	hypothetical protein LOC100128844	LOC100128844	A_32_P141365	21.3815	1.77264e-47	2.03073e-44	5.77711
402	PDZ binding kinase	PBK	A_32_P62997	19.4728	3.52066e-34	5.1818e-32	5.77432
52	excision repair cross-complementing rodent repair deficiency, complementation group 6-like	ERCC6L	A_23_P96323	26.8876	1.07288e-49	1.56871e-46	5.74165
806	IQ motif containing GTPase activating protein 3	IQGAP3	A_32_P119154	16.526	1.40665e-27	9.76331e-26	5.69228
450	histone cluster 1, H3b	HIST1H3B	A_23_P93258	18.7954	5.95561e-33	7.66866e-31	5.6582
61	cell division cycle associated 8	CDCA8	A_23_P375	25.2457	6.23004e-48	7.52501e-45	5.63285
24	hematological and neurological expressed 1	HN1	NM_016185_1_598	28.0202	5.57343e-55	1.76953e-51	5.60256
675	serine dehydratase	SDS	A_23_P2645	18.0767	2.11631e-29	1.78565e-27	5.59788
44	cell division cycle associated 5	CDCA5	A_23_P104652	26.528	1.03564e-51	1.91806e-48	5.54128
102	nucleolar and spindle associated protein 1	NUSAP1	NKI_NM_018454	25.1201	6.01354e-45	4.17651e-42	5.52411
316	Down syndrome critical region gene 6	DSCR6	A_23_P109320	17.415	2.47284e-36	4.82933e-34	5.46294
464	chromosome 19 open reading frame 21	C19orf21	A_23_P390068	16.0743	1.18194e-32	1.47906e-30	5.4627
690	nei endonuclease VIII-like 3 (E. coli)	NEIL3	A_23_P155710	17.2812	3.40758e-29	2.81323e-27	5.44654
325	family with sequence similarity 54, member A	FAM54A	A_23_P253752	19.8508	4.13951e-36	7.78332e-34	5.40925
13	sperm associated antigen 5	SPAG5	A_23_P89509	28.292	6.05236e-60	3.73642e-56	5.40548
869	endothelial cell-specific molecule 1	ESM1	A_23_P144835	15.6484	7.16107e-27	4.6131e-25	5.39116
280	G protein-coupled receptor, family C, group 5, member A	GPRC5A	A_23_P36825	18.6359	1.34261e-37	3.06986e-35	5.37997
71	anillin, actin binding protein	ANLN	A_23_P356684	24.4444	3.78509e-47	3.96803e-44	5.36124
251	ribonucleotide reductase M2	RRM2	NM_001034_1_2330	20.6937	2.3825e-38	6.12849e-36	5.2992
1019	transient receptor potential cation channel, subfamily A, member 1	TRPA1	A_23_P94249	12.3782	7.4326e-25	3.93302e-23	5.2839
273	cyclin B2	CCNB2	A_23_P65758	21.3221	1.02301e-37	2.39831e-35	5.28301
195	histone cluster 1, H2ai	HIST1H2AI	A_23_P168008	21.0785	9.93511e-41	3.56135e-38	5.27172
156	kinesin family member 20A	KIF20A	A_23_P256956	24.0548	3.99556e-42	1.83471e-39	5.26906
20	hydroxyacylglutathione hydrolase-like	HAGHL	A_24_P356367	27.2594	2.23678e-57	9.20584e-54	5.24284
53	forkhead box M1	FOXM1	NM_021953_1_2813	24.8307	1.67541e-49	2.38687e-46	5.20167
293	TTK protein kinase	TTK	A_23_P259586	20.1595	4.6948e-37	1.00714e-34	5.18101
23	protein regulator of cytokinesis 1	PRC1	NM_003981_1_2900	27.716	9.69211e-56	3.36568e-52	5.15621
125	cell division cycle associated 2	CDCA2	A_23_P385863	21.4127	4.81182e-44	2.82912e-41	5.14156
88	ubiquitin-conjugating enzyme E2C	UBE2C	A_23_P143207	23.9114	1.21013e-45	9.88777e-43	5.13647
112	baculoviral IAP repeat-containing 5	BIRC5	A_23_P118812	22.8099	1.52213e-44	9.72087e-42	5.12177
194	similar to Putative uncharacterized protein C6orf99	LOC100130967	A_23_P257497	21.7383	9.09691e-41	3.28206e-38	5.1174
170	family with sequence similarity 72, member B	FAM72B	A_32_P151794*	21.0079	1.36636e-41	5.72957e-39	5.10844
171	family with sequence similarity 72, member A	FAM72A	A_32_P151794*	21.0079	1.36636e-41	5.72957e-39	5.10844
1170	homeobox C13	HOXC13	A_23_P64809	12.7885	2.91004e-23	1.32584e-21	5.10266
331	v-myb myeloblastosis viral oncogene homolog (avian)-like 2	MYBL2	A_23_P143184	18.3874	7.12445e-36	1.30212e-33	5.08584
184	denticleless homolog (Drosophila)	DTL	NKI_NM_016448	23.3898	4.56786e-41	1.75033e-38	5.0808
372	cartilage intermediate layer protein 2	CILP2	A_23_P108238	19.3474	7.09357e-35	1.13746e-32	5.06983
507	chromosome 16 open reading frame 75	C16orf75	A_23_P353717	18.7787	7.29399e-32	8.28763e-30	5.0624
81	integrin-binding sialoprotein	IBSP	A_23_P144549	21.8398	2.83505e-46	2.64738e-43	5.06027
473	hyaluronan and proteoglycan link protein 1	HAPLN1	A_23_P7727	14.9925	1.82722e-32	2.24857e-30	5.0559
113	pituitary tumor-transforming 1	PTTG1	NM_004219_2_4	23.5328	1.76882e-44	1.12318e-41	5.03923
338	casein kinase 1, gamma 1	CSNK1G1	A_23_P117853*	20.9408	1.23259e-35	2.20207e-33	5.00994
339	KIAA0101	KIAA0101	A_23_P117853*	20.9408	1.23259e-35	2.20207e-33	5.00994
1425	cartilage oligomeric matrix protein	COMP	A_23_P90436	13.3387	2.52106e-21	9.36009e-20	5.00081
686	diaphanous homolog 3 (Drosophila)	DIAPH3	A_32_P150890	16.8351	2.70348e-29	2.25033e-27	5.00017
318	histone cluster 1, H2bd	HIST1H2BD	A_24_P146209	19.7905	2.72124e-36	5.24987e-34	4.99416
163	cadherin 24, type 2	CDH24	A_23_P405267	21.5624	7.31001e-42	3.22345e-39	4.99046
2135	synaptotagmin XIII	SYT13	A_23_P161659	9.35335	4.44952e-17	1.02988e-15	4.98443
179	exonuclease 1	EXO1	A_23_P23304	22.1165	2.4133e-41	9.57761e-39	4.87329
173	tubulin, beta 3	TUBB3	A_23_P77493	18.8896	1.44262e-41	6.00406e-39	4.85772
95	Holliday junction recognition protein	HJURP	NKI_NM_018410	24.219	2.43027e-45	1.82472e-42	4.85081
177	kinesin family member 15	KIF15	A_23_P80902	21.9641	2.23915e-41	9.01526e-39	4.83242
35	progestin and adipoQ receptor family member IV	PAQR4	A_23_P397339*	27.4918	4.66924e-53	1.03772e-49	4.82273
36	protein kinase, membrane associated tyrosine/threonine 1	PKMYT1	A_23_P397339*	27.4918	4.66924e-53	1.03772e-49	4.82273
734	lamin B1	LMNB1	A_23_P258492	15.8869	1.43844e-28	1.10926e-26	4.81033
92	pituitary tumor-transforming 3 (pseudogene)	PTTG3P	A_23_P60018	24.1488	1.8261e-45	1.40918e-42	4.78241
206	coiled-coil domain containing 19	CCDC19	A_23_P62642	20.103	4.54629e-40	1.51257e-37	4.78162
89	minichromosome maintenance complex component 10	MCM10	A_23_P161473	21.5265	1.42156e-45	1.15305e-42	4.77422
662	meiotic nuclear divisions 1 homolog (S. cerevisiae)	MND1	A_23_P133123	16.4131	1.37956e-29	1.18837e-27	4.76827
1089	chromosome 20 open reading frame 103	C20orf103	NKI_NM_012261	13.5312	4.23724e-24	2.08343e-22	4.70731
37	aurora kinase A	AURKA	NM_003600_1_2082	25.6895	7.02437e-53	1.53053e-49	4.70142
314	ISG15 ubiquitin-like modifier	ISG15	A_23_P815	17.5278	2.29605e-36	4.53994e-34	4.69725
1467	orthodenticle homeobox 1	OTX1	A_23_P403285	12.1439	4.80145e-21	1.72058e-19	4.67171
202	CDC28 protein kinase regulatory subunit 2	CKS2	NKI_NM_001827	23.3456	3.31508e-40	1.12655e-37	4.64386
126	cell division cycle 6 homolog (S. cerevisiae)	CDC6	NM_001254_2_2130	21.2721	5.5266e-44	3.23228e-41	4.61216
538	carcinoembryonic antigen-related cell adhesion molecule 5	CEACAM5	NM_004363_1_2090	13.8927	3.20384e-31	3.4167e-29	4.60393
216	zinc finger protein 587	ZNF587	A_23_P388146*	22.9296	9.57875e-40	3.04991e-37	4.52748
217	similar to ubiquitin-conjugating enzyme E2C	LOC730173	A_23_P388146*	22.9296	9.57875e-40	3.04991e-37	4.52748
131	cyclin B1	CCNB1	A_23_P122193	24.2749	7.53476e-44	4.3159e-41	4.52607
108	chromosome 16 open reading frame 59	C16orf59	A_23_P26554	25.6147	1.23574e-44	8.17377e-42	4.5098
838	pyrroline-5-carboxylate reductase 1	PYCR1	A_23_P130194	16.7623	3.22546e-27	2.16047e-25	4.50787
200	enhancer of zeste homolog 2 (Drosophila)	EZH2	NKI_NM_004456	22.3572	2.24326e-40	7.71757e-38	4.49974
62	thymidine kinase 1, soluble	TK1	NM_003258_1_580	24.9323	1.6804e-47	1.94512e-44	4.48717
207	spindle and kinetochore associated complex subunit 1	SKA1	A_24_P322354	21.2043	4.96896e-40	1.64826e-37	4.44165
952	transmembrane protein 90B	TMEM90B	A_23_P251043	13.9445	9.99903e-26	5.75711e-24	4.44111
96	similar to hematological and neurological expressed 1	LOC100130171	A_24_P384032	23.5086	2.9181e-45	2.16179e-42	4.44027
742	squalene epoxidase	SQLE	A_23_P146285	16.1855	1.90868e-28	1.45572e-26	4.43983
1518	collagen triple helix repeat containing 1	CTHRC1	A_23_P111888	12.5223	1.05295e-20	3.63149e-19	4.42266
58	thyroid hormone receptor interactor 13	TRIP13	NKI_U96131	22.9865	2.69779e-48	3.5269e-45	4.41891
241	meteorin, glial cell differentiation regulator	METRN	A_23_P49256	18.2382	1.00396e-38	2.7013e-36	4.38316
93	histone cluster 2, H2aa4	HIST2H2AA4	A_23_P103985*	20.4596	1.96132e-45	1.49279e-42	4.31556
94	histone cluster 2, H2aa3	HIST2H2AA3	A_23_P103985*	20.4596	1.96132e-45	1.49279e-42	4.31556
1621	chromosome 6 open reading frame 126	C6orf126	A_23_P122592	11.3979	5.43634e-20	1.72404e-18	4.29553
948	coagulation factor XII (Hageman factor)	F12	A_23_P167674	14.6613	9.01115e-26	5.21263e-24	4.29287
1962	matrix metallopeptidase 10 (stromelysin 2)	MMP10	A_23_P13094	10.2749	5.41809e-18	1.39144e-16	4.28773
46	high-mobility group box 3-like 1	HMGB3L1	A_23_P373119	23.1619	2.24391e-51	3.83616e-48	4.27552
644	platelet-activating factor acetylhydrolase 1b, catalytic subunit 3 (29kDa)	PAFAH1B3	A_23_P16078	19.1239	7.3094e-30	6.49794e-28	4.2623
114	non-SMC condensin I complex, subunit H	NCAPH	BC024211_1_1961	22.6851	1.81945e-44	1.14877e-41	4.25512
66	centromere protein E, 312kDa	CENPE	NM_001813_1_8118	24.0777	2.58086e-47	2.83953e-44	4.24731
155	cell division cycle 20 homolog (S. cerevisiae)	CDC20	A_23_P149196	21.7939	3.27272e-42	1.52805e-39	4.2462
10	kinesin family member 11	KIF11	A_23_P52279	27.6568	1.92761e-61	1.64771e-57	4.23912
255	ATPase family, AAA domain containing 2	ATAD2	NKI_NM_014109	19.8847	2.93217e-38	7.47321e-36	4.20994
404	kinesin family member 18A	KIF18A	A_23_P150668	18.6899	4.65717e-34	6.79159e-32	4.19804
232	cell division cycle 25 homolog C (S. pombe)	CDC25C	NM_001790_2_2002	22.6719	5.61e-39	1.59846e-36	4.19464
969	prolyl 4-hydroxylase, alpha polypeptide III	P4HA3	A_24_P290286	15.1399	1.60528e-25	9.06884e-24	4.18359
249	CHK1 checkpoint homolog (S. pombe)	CHEK1	A_23_P116124	19.4957	1.96198e-38	5.10588e-36	4.17847
157	cytochrome c oxidase subunit VIc	COX6C	NM_004374_2_138	16.9982	4.45236e-42	2.01943e-39	4.17754
2221	collagen, type I, alpha 1	COL1A1	A_23_P207521	10.5998	1.25522e-16	2.7747e-15	4.16237
3572	S100 calcium binding protein A14	S100A14	A_23_P124619	7.93002	6.87002e-12	8.82359e-11	4.13745
710	IGF-like family member 2	IGFL2	A_23_P153571	14.8262	5.67666e-29	4.56116e-27	4.10661
181	placenta-specific 1	PLAC1	A_23_P148609	19.2501	2.65981e-41	1.0444e-38	4.105
688	GINS complex subunit 2 (Psf2 homolog)	GINS2	A_23_P118243	16.8688	3.14193e-29	2.60553e-27	4.10044
681	DEAQ box RNA-dependent ATPase 1	DQX1	A_23_P56659	13.9192	2.58276e-29	2.15955e-27	4.08541
780	thymidylate synthetase	TYMS	A_23_P50095	15.6775	6.52556e-28	4.66928e-26	4.07008
27	cystatin SN	CST1	A_23_P112859	20.3922	3.81476e-54	1.05977e-50	4.05671
696	single-minded homolog 2 (Drosophila)	SIM2	A_23_P211111	13.1808	4.12153e-29	3.36515e-27	4.0415
50	cell division cycle associated 3	CDCA3	A_23_P162479	24.845	1.12777e-50	1.76509e-47	4.04051
436	glutamate receptor, metabotropic 8	GRM8	A_32_P8221	18.0984	2.68204e-33	3.60382e-31	4.03641
327	germ cell associated 2 (haspin)	GSG2	A_24_P76521	19.629	4.34386e-36	8.14002e-34	4.02861
154	paired-like homeodomain 1	PITX1	A_23_P58636	19.8219	3.20595e-42	1.50318e-39	4.02173
2	cystatin SA	CST2	A_24_P237172	23.4747	5.65845e-71	3.14392e-66	4.01893
582	SHC SH2-domain binding protein 1	SHCBP1	A_23_P206540	17.4207	1.08505e-30	1.07177e-28	4.01501
4670	chemokine (C-X-C motif) ligand 13	CXCL13	A_23_P121697	6.41455	4.58914e-09	4.2653e-08	4.00493
135	histone cluster 1, H2ad	HIST1H2AD	A_23_P428184	19.7908	1.39761e-43	7.72667e-41	3.98675
2411	ankyrin repeat domain 22	ANKRD22	A_23_P161426	9.98035	8.79502e-16	1.77084e-14	3.98015
416	matrilin 3	MATN3	NKI_AJ224741	15.4911	8.81961e-34	1.25488e-31	3.97682
297	polymerase (DNA directed), theta	POLQ	A_23_P218827	19.7559	5.73625e-37	1.21879e-34	3.96798
263	protein kinase C and casein kinase substrate in neurons 1	PACSIN1	A_23_P258088	18.7986	5.42661e-38	1.33708e-35	3.95906
185	feline leukemia virus subgroup C cellular receptor 1	FLVCR1	A_23_P12113	22.6032	4.80789e-41	1.82968e-38	3.95173
589	v-myb myeloblastosis viral oncogene homolog (avian)-like 1	MYBL1	A_24_P367227	15.6698	1.30801e-30	1.27612e-28	3.94977
192	cyclin-dependent kinase inhibitor 3	CDKN3	A_23_P48669	22.1493	7.9779e-41	2.90665e-38	3.93807
1777	epithelial splicing regulatory protein 1	ESRP1	A_23_P259127	12.215	5.15451e-19	1.4839e-17	3.93682
3897	keratin 19	KRT19	NM_002276_2_1204	7.64543	5.25236e-11	6.06587e-10	3.92999
324	chromosome 8 open reading frame 51	C8orf51	A_23_P71502	19.9241	4.01127e-36	7.55498e-34	3.91824
225	chromosome 9 open reading frame 100	C9orf100	A_23_P216517	21.2896	2.32821e-39	7.01133e-37	3.9002
17	bone morphogenetic protein 8a	BMP8A	A_23_P85922	28.6984	2.59269e-58	1.30958e-54	3.87903
294	ASF1 anti-silencing function 1 homolog B (S. cerevisiae)	ASF1B	NM_018154_1_937	21.8513	5.21125e-37	1.1115e-34	3.87215
349	histone cluster 1, H2aj	HIST1H2AJ	A_24_P394511*	18.6921	2.11226e-35	3.66179e-33	3.85727
40	high-mobility group box 3	HMGB3	A_32_P161910*	22.8698	4.27112e-52	8.47536e-49	3.8482
41	similar to high mobility group box 3	LOC729952	A_32_P161910*	22.8698	4.27112e-52	8.47536e-49	3.8482
48	high mobility group protein B3-like protein-like	LOC441795	A_24_P67681	22.5849	4.2864e-51	7.00467e-48	3.84314
169	ubiquitin-like with PHD and ring finger domains 1	UHRF1	A_32_P101230	21.4416	1.24743e-41	5.27064e-39	3.8359
119	similar to high mobility group box 3	LOC646993	A_24_P49753	21.3651	2.61342e-44	1.58694e-41	3.82754
618	KIAA1211	KIAA1211	A_24_P331885	15.8453	3.11969e-30	2.89857e-28	3.82603
1191	neuromedin U	NMU	A_23_P69537	11.4773	4.46873e-23	1.99911e-21	3.82065
1147	receptor (G protein-coupled) activity modifying protein 1	RAMP1	A_23_P50946	12.6083	1.81604e-23	8.43311e-22	3.81337
86	Fanconi anemia, complementation group I	FANCI	A_23_P375104	23.3099	8.69503e-46	7.21058e-43	3.80737
183	epithelial cell transforming sequence 2 oncogene	ECT2	NKI_NM_018098	22.5685	3.88666e-41	1.49964e-38	3.79978
457	chemokine (C-C motif) ligand 11	CCL11	A_23_P66635	16.9897	8.19953e-33	1.04251e-30	3.79665
90	chromosome 15 open reading frame 42	C15orf42	A_23_P345707	21.5495	1.62858e-45	1.28349e-42	3.79544
500	MLF1 interacting protein	MLF1IP	A_23_P254733	18.0256	4.94418e-32	5.70521e-30	3.78809
375	E2F transcription factor 2	E2F2	A_23_P408957	18.4628	8.36731e-35	1.32639e-32	3.7854
1189	macrophage scavenger receptor 1	MSR1	A_23_P392942	13.5822	4.38982e-23	1.96618e-21	3.77118
392	Rho GTPase activating protein 11A	ARHGAP11A	A_23_P136805	18.8175	2.13968e-34	3.23494e-32	3.75921
220	similar to high mobility group box 3	LOC729595	A_24_P24685	20.1755	1.20649e-39	3.77657e-37	3.72394
1129	ret proto-oncogene	RET	A_24_P343687	12.2002	1.28935e-23	6.06587e-22	3.70294
449	histone cluster 1, H4h	HIST1H4H	A_23_P323685	17.2235	5.1997e-33	6.71867e-31	3.69085
16	Rac GTPase activating protein 1	RACGAP1	A_23_P65110	27.4356	1.05943e-58	5.60603e-55	3.68131
1141	ezrin	EZR	A_24_P290473	14.2158	1.57591e-23	7.3518e-22	3.6788
1556	homeobox C12	HOXC12	A_23_P335981	10.4715	2.01415e-20	6.72733e-19	3.66556
172	histone cluster 2, H2ab	HIST2H2AB	A_24_P68635	19.8929	1.40683e-41	5.87711e-39	3.66385
599	eukaryotic translation elongation factor 1 alpha 2	EEF1A2	A_24_P399640	14.0757	1.6895e-30	1.61986e-28	3.66166
186	kinesin family member C1	KIFC1	A_23_P133954	21.4109	4.95355e-41	1.87868e-38	3.65238
240	aurora kinase A pseudogene 1	AURKAPS1	A_24_P195463	20.2873	7.97283e-39	2.19298e-36	3.63829
5	POC1 centriolar protein homolog A (Chlamydomonas)	POC1A	A_24_P345748	32.0749	1.71316e-64	2.37964e-60	3.63171
617	carcinoembryonic antigen-related cell adhesion molecule 7	CEACAM7	A_24_P228302	13.0204	3.04801e-30	2.83435e-28	3.63008
687	2'-5'-oligoadenylate synthetase-like	OASL	A_23_P139786	14.9482	3.02814e-29	2.51492e-27	3.62829
601	nucleoporin 210kDa	NUP210	A_23_P212150	18.4709	1.75824e-30	1.68287e-28	3.62589
732	syndecan 1	SDC1	A_24_P97129	15.7125	1.33818e-28	1.03481e-26	3.61357
1833	endothelin 2	EDN2	A_23_P46718	11.122	1.04077e-18	2.8935e-17	3.6066
143	coiled-coil domain containing 78	CCDC78	A_23_P354864	18.3039	5.94117e-43	3.0424e-40	3.58532
1073	rhotekin 2	RTKN2	A_23_P52410	13.722	2.3636e-24	1.18631e-22	3.58017
415	centromere protein I	CENPI	A_23_P252291	18.5027	8.59388e-34	1.2259e-31	3.57861
1803	melanoma antigen family A, 1 (directs expression of antigen MZ2-E)	MAGEA1	A_23_P96291	9.87278	7.29512e-19	2.06537e-17	3.57055
737	hypothetical LOC729983	LOC729983	A_32_P152696	16.2665	1.49703e-28	1.15045e-26	3.56973
2789	MARVEL domain containing 2	MARVELD2	A_24_P106363	9.59691	1.82942e-14	3.16503e-13	3.5683
399	C1q and tumor necrosis factor related protein 6	C1QTNF6	A_24_P211565	18.9825	3.25983e-34	4.82347e-32	3.56793
355	hypothetical protein LOC651721	LOC651721	A_24_P282266	17.9828	2.51791e-35	4.29796e-33	3.55323
743	chromosome 9 open reading frame 140	C9orf140	A_24_P100517	16.0972	1.94619e-28	1.48229e-26	3.53384
1508	chemokine (C-C motif) ligand 7	CCL7	A_23_P78028	11.1598	8.72092e-21	3.03411e-19	3.52984
266	unc-5 homolog B (C. elegans)	UNC5B	A_23_P52337	19.3305	6.36532e-38	1.55117e-35	3.52948
5749	epithelial cell adhesion molecule	EPCAM	A_23_P91081	5.408	5.46593e-07	4.01899e-06	3.52887
97	spindle and kinetochore associated complex subunit 3	SKA3	NM_145061_1_2084	23.5684	3.03803e-45	2.23573e-42	3.52378
161	cell division cycle 45 homolog (S. cerevisiae)	CDC45	NM_003504_2_1120	20.4237	5.9465e-42	2.65379e-39	3.5185
988	claspin homolog (Xenopus laevis)	CLSPN	A_23_P126212	14.8268	2.36335e-25	1.3118e-23	3.51262
77	RecQ protein-like 4	RECQL4	A_23_P71558	22.6483	1.43054e-46	1.39444e-43	3.51181
3581	keratin 18 pseudogene	FLJ40504	A_23_P373704	8.08105	7.1896e-12	9.20108e-11	3.50805
42	transforming, acidic coiled-coil containing protein 3	TACC3	A_23_P212844	25.9751	6.98187e-52	1.33767e-48	3.50678
277	TLC domain containing 1	TLCD1	A_23_P420413	19.9684	1.18733e-37	2.75448e-35	3.50666
235	SPC24, NDC80 kinetochore complex component, homolog (S. cerevisiae)	SPC24	A_24_P314571	20.138	5.85299e-39	1.65077e-36	3.49431
91	G protein regulated inducer of neurite outgrowth 1	GPRIN1	A_24_P160466	23.357	1.74918e-45	1.35926e-42	3.48824
727	neuralized homolog (Drosophila)	NEURL	A_23_P138492	13.749	1.01693e-28	7.96929e-27	3.47893
1520	regulating synaptic membrane exocytosis 4	RIMS4	A_32_P38649	10.8903	1.14644e-20	3.93928e-19	3.47712
159	histone cluster 2, H4b	HIST2H4B	A_24_P370921*	17.4616	4.78136e-42	2.15109e-39	3.47324
160	histone cluster 2, H4a	HIST2H4A	A_24_P370921*	17.4616	4.78136e-42	2.15109e-39	3.47324
452	transmembrane protein 97	TMEM97	A_23_P355134	17.5123	6.35243e-33	8.15128e-31	3.46987
990	motor neuron and pancreas homeobox 1	MNX1	A_32_P6015	12.6036	2.37632e-25	1.31703e-23	3.46556
1744	periostin, osteoblast specific factor	POSTN	NM_006475_1_2434	11.2573	3.0221e-19	8.8866e-18	3.46041
269	collagen, type XII, alpha 1	COL12A1	A_24_P291810	16.6941	6.71423e-38	1.6255e-35	3.45677
51	Sec61 alpha 2 subunit (S. cerevisiae)	SEC61A2	A_23_P161197	23.5642	5.98706e-50	8.99054e-47	3.44875
894	Similar to LOC166075	LOC401097	A_23_P305245	15.1067	1.62802e-26	1.01464e-24	3.44299
446	transmembrane protease, serine 4	TMPRSS4	A_23_P127608	13.8986	3.51441e-33	4.62168e-31	3.44048
76	histone cluster 1, H3h	HIST1H3H	A_23_P333484	23.6644	1.40651e-46	1.38315e-43	3.437
432	SCL/TAL1 interrupting locus	STIL	A_23_P370604	18.2659	2.04992e-33	2.80534e-31	3.43303
1366	calpain 9	CAPN9	A_23_P149427	11.5344	8.26617e-22	3.23665e-20	3.41828
429	RAD54-like (S. cerevisiae)	RAD54L	A_23_P74115	18.4775	1.92369e-33	2.64563e-31	3.41827
279	histone cluster 1, H4f	HIST1H4F	A_23_P359540	18.7695	1.34219e-37	3.07521e-35	3.41771
756	solute carrier family 7 (cationic amino acid transporter, y+ system), member 5	SLC7A5	A_24_P335618	14.3462	3.01162e-28	2.25512e-26	3.40929
479	MAD2 mitotic arrest deficient-like 1 (yeast)	MAD2L1	NKI_NM_002358	17.2904	2.14461e-32	2.59886e-30	3.40785
330	zinc finger protein 367	ZNF367	AK091289_1_2540	19.0211	6.06006e-36	1.11677e-33	3.40255
942	artemin	ARTN	A_23_P103648	14.1802	6.38083e-26	3.73975e-24	3.402
438	histone cluster 1, H2bi	HIST1H2BI	A_23_P111043	17.6351	2.93691e-33	3.93203e-31	3.39791
2570	matrix metallopeptidase 3 (stromelysin 1, progelatinase)	MMP3	A_23_P161698	9.30114	3.13236e-15	5.90061e-14	3.39427
661	janus kinase and microtubule interacting protein 1	JAKMIP1	A_23_P144274	13.936	1.35686e-29	1.17064e-27	3.39286
461	protein phosphatase 2, regulatory subunit B, gamma	PPP2R2C	A_23_P155657	14.2763	1.07567e-32	1.3537e-30	3.39
1387	hairy and enhancer of split 6 (Drosophila)	HES6	A_23_P131199	12.7019	1.24472e-21	4.77779e-20	3.38425
2434	tumor protein D52	TPD52	A_24_P166807	10.2838	1.04382e-15	2.08469e-14	3.38361
2556	adaptor-related protein complex 1, mu 2 subunit	AP1M2	A_23_P78543	10.1086	2.89833e-15	5.48766e-14	3.38335
717	tumor necrosis factor (ligand) superfamily, member 4	TNFSF4	A_23_P126833	16.1193	7.28426e-29	5.79005e-27	3.37317
1042	histone cluster 1, H1d	HIST1H1D	A_24_P260640	13.8594	1.23023e-24	6.36737e-23	3.36965
911	2'-5'-oligoadenylate synthetase 2, 69/71kDa	OAS2	NM_002535_1_2575	14.204	2.73988e-26	1.67012e-24	3.36602
373	NUAK family, SNF1-like kinase, 2	NUAK2	A_23_P52158	19.1663	7.28629e-35	1.16668e-32	3.3563
1243	cyclin A2	CCNA2	A_23_P58316	13.4159	1.06789e-22	4.58529e-21	3.35088
1055	wingless-type MMTV integration site family, member 7B	WNT7B	A_23_P320050	13.3877	1.55117e-24	7.93971e-23	3.34735
9	epiphycan	EPYC	NM_004950_2_685	19.9429	1.69838e-61	1.57274e-57	3.34651
1599	collagen, type V, alpha 2	COL5A2	A_23_P33196	11.705	4.02829e-20	1.29787e-18	3.31788
1360	discs, large homolog 3 (Drosophila)	DLG3	A_23_P125698	13.7419	7.73523e-22	3.03947e-20	3.30629
2904	collagen, type VIII, alpha 1	COL8A1	A_23_P69030	9.13283	4.94189e-14	8.16348e-13	3.30088
997	RIB43A domain with coiled-coils 2	RIBC2	A_23_P166527	14.0654	3.14905e-25	1.7238e-23	3.29972
1468	BRCA1 interacting protein C-terminal helicase 1	BRIP1	A_23_P15843	12.5106	4.82775e-21	1.72945e-19	3.29929
193	histone cluster 1, H4i	HIST1H4I	A_24_P20873	19.814	9.07963e-41	3.2865e-38	3.29663
4464	similar to RIKEN cDNA 4930443G12	LOC727941	A_24_P212548	6.35285	1.58737e-09	1.55331e-08	3.2959
1378	family with sequence similarity 132, member B	FAM132B	A_23_P364505	12.1576	1.03534e-21	4.00594e-20	3.29566
2290	keratin 19 pseudogene 2	KRT19P2	A_23_P353865	10.22	2.55165e-16	5.44027e-15	3.2818
1125	enabled homolog (Drosophila)	ENAH	A_23_P337767	13.9561	1.21392e-23	5.73775e-22	3.26469
419	membrane-associated ring finger (C3HC4) 4	2004-03-01	A_23_P333230	16.2658	1.24474e-33	1.75088e-31	3.2644
630	homeobox C10	HOXC10	A_24_P218806	14.1225	4.37219e-30	3.98893e-28	3.26012
1226	forkhead box J1	FOXJ1	A_23_P348636	10.9667	8.16026e-23	3.54909e-21	3.25959
1359	transmembrane protein 132A	TMEM132A	A_23_P24713	12.8798	7.66643e-22	3.0135e-20	3.2533
961	placenta-specific 2 (non-protein coding)	PLAC2	A_23_P359666	12.7423	1.46551e-25	8.32576e-24	3.24699
2781	cingulin	CGN	A_24_P45730	9.49302	1.66554e-14	2.89141e-13	3.24248
2874	matrix metallopeptidase 12 (macrophage elastase)	MMP12	A_23_P150317	8.40042	3.9266e-14	6.55946e-13	3.23465
494	chromobox homolog 2 (Pc class homolog, Drosophila)	CBX2	AL157459_1_1981	14.4839	4.05183e-32	4.73949e-30	3.23178
299	histone cluster 1, H3f	HIST1H3F	A_23_P30799	20.86	6.48408e-37	1.36723e-34	3.23066
391	histone cluster 3, H2bb	HIST3H2BB	A_23_P332993	18.0962	2.13118e-34	3.22647e-32	3.22889
1569	sorbitol dehydrogenase	SORD	A_23_P77103	12.0802	2.53375e-20	8.37471e-19	3.22643
362	E2F transcription factor 1	E2F1	A_23_P80032	18.6644	4.21207e-35	6.97552e-33	3.22181
73	hypothetical LOC146880	LOC146880	A_23_P125262*	22.2245	4.88572e-47	5.027e-44	3.2176
74	karyopherin alpha 2 (RAG cohort 1, importin alpha 1)	KPNA2	A_23_P125262*	22.2245	4.88572e-47	5.027e-44	3.2176
199	ubiquitin-conjugating enzyme E2S	UBE2S	NM_014501_1_635	21.5666	1.64248e-40	5.68589e-38	3.21686
1180	RAB11 family interacting protein 1 (class I)	RAB11FIP1	A_23_P391198	12.9975	3.7286e-23	1.68565e-21	3.20886
442	ectonucleoside triphosphate diphosphohydrolase 7	ENTPD7	A_23_P86623	19.7929	3.39766e-33	4.50009e-31	3.20772
3599	similar to hCG1777210	PP14571	AK092442_1_1901	7.4066	8.0922e-12	1.02863e-10	3.19583
629	helicase, lymphoid-specific	HELLS	A_23_P12812	16.9865	4.3275e-30	3.95139e-28	3.19376
979	breast cancer 2, early onset	BRCA2	NM_000059_1_10616	14.5025	2.09472e-25	1.17089e-23	3.19286
1559	histone cluster 1, H1c	HIST1H1C	A_23_P122445	11.1715	2.06948e-20	6.90385e-19	3.19103
918	proline rich 11	PRR11	A_23_P207306	14.2383	3.21982e-26	1.94878e-24	3.18907
1012	LIM homeobox 2	LHX2	A_23_P32165	12.3672	5.37251e-25	2.87577e-23	3.18887
2383	similar to keratin 8	LOC149501	A_32_P112546	10.1019	6.66738e-16	1.3607e-14	3.18864
1098	claudin 14	CLDN14	A_23_P91512	13.1856	5.32489e-24	2.59639e-22	3.18797
60	minichromosome maintenance complex component 4	MCM4	X74794_1_2546	22.6283	5.28781e-48	6.67725e-45	3.18701
1954	interleukin 19	IL19	NM_013371_1_850	10.0071	5.12094e-18	1.32001e-16	3.18468
4645	ovo-like 1(Drosophila)	OVOL1	A_23_P202810	6.607	3.92202e-09	3.67383e-08	3.18387
2066	complement factor B	CFB	NM_001710_2_1865	9.43825	2.09816e-17	5.0303e-16	3.17158
3427	solute carrier family 44, member 4	SLC44A4	A_23_P93349	7.77625	2.44856e-12	3.31819e-11	3.16983
492	histone cluster 1, H2al	HIST1H2AL	A_23_P363174	16.7325	3.68028e-32	4.32308e-30	3.16878
656	ring finger protein 213	RNF213	A_24_P923884	16.635	1.0974e-29	9.53453e-28	3.16371
1516	histone cluster 1, H2ae	HIST1H2AE	A_23_P59045	12.2552	1.00373e-20	3.46498e-19	3.15936
363	leucine rich repeat and fibronectin type III domain containing 2	LRFN2	A_32_P82114	16.4119	4.29203e-35	7.09738e-33	3.15936
1886	keratin 37	KRT37	A_23_P118854	10.0337	2.09703e-18	5.63959e-17	3.156
1787	prolactin receptor	PRLR	A_23_P167475	11.5404	6.31767e-19	1.80195e-17	3.15487
84	G-2 and S-phase expressed 1	GTSE1	A_23_P57588	22.6862	6.70819e-46	5.77856e-43	3.15383
951	radical S-adenosyl methionine domain containing 2	RSAD2	A_23_P120178	13.1837	9.89019e-26	5.70035e-24	3.1534
354	ADAM metallopeptidase domain 8	ADAM8	NM_001109_1_2491	18.1143	2.48236e-35	4.2438e-33	3.14678
445	chromosome 20 open reading frame 201	C20orf201	A_32_P88315	15.2798	3.51228e-33	4.62435e-31	3.14667
366	histone cluster 1, H2bm	HIST1H2BM	A_24_P3786	18.3793	4.84835e-35	7.94635e-33	3.14447
1519	SLAM family member 8	SLAMF8	A_23_P200130	11.8524	1.11994e-20	3.85536e-19	3.14165
559	homeobox B13	HOXB13	A_23_P4211	13.2366	5.24033e-31	5.40688e-29	3.13498
3298	hook homolog 1 (Drosophila)	HOOK1	A_23_P114879	8.65881	9.8538e-13	1.39827e-11	3.13123
592	Fanconi anemia, complementation group A	FANCA	A_23_P206441	15.6107	1.49075e-30	1.443e-28	3.12874
2334	matrix metallopeptidase 9 (gelatinase B, 92kDa gelatinase, 92kDa type IV collagenase)	MMP9	NM_004994_1_1525	10.4513	4.03039e-16	8.40594e-15	3.12817
517	calcyphosine	CAPS	A_24_P313993	15.18	1.20587e-31	1.33866e-29	3.12211
304	microfibrillar-associated protein 2	MFAP2	A_23_P1027	18.0232	8.25384e-37	1.70165e-34	3.12118
308	histone cluster 1, H2bj	HIST1H2BJ	A_23_P133851	18.1349	1.25391e-36	2.53804e-34	3.11831
3354	hypothetical protein LOC100128098	LOC100128098	A_32_P37288	7.57326	1.55205e-12	2.15747e-11	3.11506
1676	zinc finger, BED-type containing 2	ZBED2	A_23_P113793	10.8208	1.09362e-19	3.35524e-18	3.11039
413	histone cluster 1, H2bf	HIST1H2BF	A_23_P42178	17.2506	7.65984e-34	1.09689e-31	3.10894
98	ring finger protein, transmembrane 2	RNFT2	A_24_P13390	21.5804	3.1429e-45	2.29768e-42	3.10801
624	SPOC domain containing 1	SPOCD1	A_23_P431388	15.8675	3.82966e-30	3.51415e-28	3.10513
721	histone cluster 1, H2bg	HIST1H2BG	A_23_P167997	15.464	8.19937e-29	6.46198e-27	3.09321
2407	secreted phosphoprotein 1	SPP1	NM_000582_1_785	9.51837	8.44091e-16	1.70263e-14	3.09064
4095	RAB25, member RAS oncogene family	RAB25	A_23_P115091	7.44598	1.72345e-10	1.87796e-09	3.09023
146	centromere protein O	CENPO	A_23_P50990	21.6599	1.31089e-42	6.47424e-40	3.08716
2893	similar to keratin 18	LOC442249	A_24_P256064	9.16728	4.55442e-14	7.5515e-13	3.08332
1154	histone cluster 1, H1e	HIST1H1E	A_23_P7974	12.8904	1.99115e-23	9.2001e-22	3.08235
454	NK3 homeobox 2	NKX3-2	A_23_P386254	16.1955	7.22661e-33	9.21978e-31	3.08182
2490	tumor necrosis factor receptor superfamily, member 9	TNFRSF9	A_23_P51937	9.71089	1.75232e-15	3.40842e-14	3.08176
3246	UDP-N-acetyl-alpha-D-galactosamine:polypeptide N-acetylgalactosaminyltransferase 6 (GalNAc-T6)	GALNT6	A_23_P204133	8.36828	6.65953e-13	9.63953e-12	3.07935
83	absent in melanoma 1-like	AIM1L	A_23_P360324	20.424	4.85801e-46	4.21747e-43	3.07899
130	histone cluster 1, H2am	HIST1H2AM	A_23_P259547	19.2698	6.34243e-44	3.65176e-41	3.07875
358	citron (rho-interacting, serine/threonine kinase 21)	CIT	A_23_P420552	19.29	3.17507e-35	5.36205e-33	3.07738
1067	Nedd4 binding protein 3	N4BP3	A_23_P58747	14.0383	2.09139e-24	1.05541e-22	3.07126
2681	solute carrier family 16, member 6 (monocarboxylic acid transporter 7)	SLC16A6	A_23_P152791	8.95327	7.57275e-15	1.36675e-13	3.06119
353	Bloom syndrome, RecQ helicase-like	BLM	A_23_P88631	18.3085	2.43551e-35	4.17656e-33	3.05931
2695	cerebellin 2 precursor	CBLN2	A_23_P15886	8.24834	8.24392e-15	1.48115e-13	3.05673
971	GINS complex subunit 1 (Psf1 homolog)	GINS1	A_23_P210853	14.9534	1.66638e-25	9.40445e-24	3.04267
2938	keratin 18	KRT18	A_23_P99321	9.05904	6.40417e-14	1.04317e-12	3.04129
287	pituitary tumor-transforming 2	PTTG2	A_23_P18572	19.363	2.90173e-37	6.41052e-35	3.03909
374	bone morphogenetic protein 8b	BMP8B	A_23_P380939	18.1325	7.88299e-35	1.25499e-32	3.03135
1256	endoplasmic reticulum to nucleus signaling 2	ERN2	A_24_P313504*	13.5733	1.54443e-22	6.52553e-21	3.03021
977	sal-like 4 (Drosophila)	SALL4	A_23_P109074	14.3615	2.01773e-25	1.13069e-23	3.02614
1619	calumenin	CALU	A_32_P220102	11.9141	5.38162e-20	1.70766e-18	3.02458
485	BRI3 binding protein	BRI3BP	A_23_P25313	18.2132	2.68795e-32	3.21521e-30	3.02358
1020	inositol 1,4,5-trisphosphate 3-kinase A	ITPKA	A_23_P65917	13.1697	7.45582e-25	3.94155e-23	3.0231
439	RAB26, member RAS oncogene family	RAB26	A_23_P54709	16.5423	2.96066e-33	3.95905e-31	3.02195
6829	forkhead box A1	FOXA1	A_24_P347432	4.25147	2.92605e-05	0.000173841	3.01976
1116	actin-like 8	ACTL8	A_32_P176018	11.216	9.90587e-24	4.71826e-22	3.01765
398	gamma-aminobutyric acid (GABA) A receptor, delta	GABRD	A_23_P309720	18.6084	3.00024e-34	4.45717e-32	3.01523
2209	heparan sulfate 6-O-sulfotransferase 3	HS6ST3	A_23_P381523	9.39341	1.0782e-16	2.40201e-15	3.01186
2338	preferentially expressed antigen in melanoma	PRAME	A_23_P166356	8.94735	4.16483e-16	8.67495e-15	3.01163
328	chromosome 1 open reading frame 230	C1orf230	A_32_P212471	15.1356	4.41471e-36	8.25885e-34	3.00903
3681	protein tyrosine phosphatase, non-receptor type 14	PTPN14	A_24_P383660	7.87232	1.40185e-11	1.73125e-10	3.00804
832	E74-like factor 3 (ets domain transcription factor, epithelial-specific )	ELF3	A_24_P814749	15.1389	2.70751e-27	1.82564e-25	3.00359
1334	KIAA1244	KIAA1244	A_32_P498899	12.681	5.2521e-22	2.1009e-20	3.00358
1386	fatty acid binding protein 6, ileal	FABP6	A_23_P43846	10.9432	1.22088e-21	4.69114e-20	3.00079
957	phospholipase A2, group X	PLA2G10	NM_003561_1_783	12.3489	1.29688e-25	7.39041e-24	2.99934
755	zinc finger protein 695	ZNF695	A_24_P254705	13.687	2.92104e-28	2.19025e-26	2.9965
239	centromere protein L	CENPL	A_23_P126116	21.7421	7.72205e-39	2.12927e-36	2.99531
1056	centromere protein K	CENPK	A_23_P155989	14.4355	1.58051e-24	8.0824e-23	2.99253
747	hematopoietic SH2 domain containing	HSH2D	A_23_P153372	14.0882	2.14446e-28	1.62772e-26	2.98979
1822	solute carrier family 9 (sodium/hydrogen exchanger), member 3 regulator 1	SLC9A3R1	A_23_P308519	11.2548	9.08339e-19	2.5425e-17	2.9842
1460	interferon, gamma-inducible protein 30	IFI30	A_23_P153745	12.7559	4.44639e-21	1.60161e-19	2.98356
99	pyrroline-5-carboxylate reductase-like	PYCRL	A_24_P4213	22.5326	3.17481e-45	2.30585e-42	2.98102
3717	EPS8-like 1	EPS8L1	A_23_P208772	7.86932	1.70883e-11	2.09015e-10	2.97873
69	recombination activating gene 1 activating protein 1	RAG1AP1	A_23_P158621	23.7	3.31781e-47	3.54505e-44	2.97834
803	ADAM metallopeptidase with thrombospondin type 1 motif, 14	ADAMTS14	A_24_P275073	16.4107	1.24589e-27	8.68009e-26	2.97819
140	endothelin converting enzyme 2	ECE2	A_23_P92261	21.2606	4.4717e-43	2.36623e-40	2.97808
669	membrane bound O-acyltransferase domain containing 2	MBOAT2	A_23_P370636	15.9086	1.68932e-29	1.4418e-27	2.97361
786	PIF1 5'-to-3' DNA helicase homolog (S. cerevisiae)	PIF1	A_23_P416462	14.426	7.37643e-28	5.24099e-26	2.9717
469	sulfatase 1	SULF1	A_23_P43167	15.9895	1.48364e-32	1.84003e-30	2.97021
595	origin recognition complex, subunit 6 like (yeast)	ORC6L	A_23_P100345	15.4126	1.5694e-30	1.51255e-28	2.96839
345	PTK6 protein tyrosine kinase 6	PTK6	A_23_P56980	17.8849	1.50192e-35	2.64498e-33	2.96768
496	extra spindle pole bodies homolog 1 (S. cerevisiae)	ESPL1	A_23_P32707	18.1947	4.46601e-32	5.19661e-30	2.96655
426	apolipoprotein B mRNA editing enzyme, catalytic polypeptide-like 3A	APOBEC3A	A_24_P66027*	15.4198	1.73918e-33	2.40676e-31	2.96595
427	apolipoprotein B mRNA editing enzyme, catalytic polypeptide-like 3B	APOBEC3B	A_24_P66027*	15.4198	1.73918e-33	2.40676e-31	2.96595
593	F-box and leucine-rich repeat protein 6	FBXL6	A_23_P43297	17.2608	1.52744e-30	1.47467e-28	2.96587
433	histone cluster 1, H2bl	HIST1H2BL	A_23_P8013	17.0784	2.30611e-33	3.12896e-31	2.96515
3241	hox transcript antisense RNA (non-protein coding)	HOTAIR	A_32_P168441	7.96936	6.26465e-13	9.09401e-12	2.95408
3007	archaelysin family metallopeptidase 1	AMZ1	A_24_P383649	8.45095	1.07132e-13	1.6968e-12	2.94807
1439	glucocorticoid receptor DNA binding factor 1	GRLF1	A_23_P39137	12.6722	3.11003e-21	1.14171e-19	2.94575
2339	Wilms tumor 1	WT1	A_23_P116272	9.27202	4.17408e-16	8.69259e-15	2.94565
18	chromosome 6 open reading frame 129	C6orf129	A_23_P133770	28.9666	7.38907e-58	3.42123e-54	2.9407
2917	immunoglobulin superfamily, member 9	IGSF9	A_23_P85442	9.28748	5.49565e-14	9.02724e-13	2.93662
187	tumor necrosis factor receptor superfamily, member 18	TNFRSF18	A_23_P12215	17.7366	5.36924e-41	2.02941e-38	2.93433
337	solute carrier family 16, member 3 (monocarboxylic acid transporter 4)	SLC16A3	NM_004207_1_1404	18.1779	1.16405e-35	2.08297e-33	2.93382
484	histone cluster 1, H2bc	HIST1H2BC	A_24_P63671	16.6287	2.44184e-32	2.92712e-30	2.93308
5215	hypothetical LOC440335	LOC440335	A_24_P229884	5.92981	5.59988e-08	4.61526e-07	2.92822
1283	Ral GEF with PH domain and SH3 binding motif 2	RALGPS2	A_24_P173746	12.2092	2.51684e-22	1.04241e-20	2.92559
1238	fibrillin 2	FBN2	NM_001999_2_10052	12.0756	1.00592e-22	4.33761e-21	2.92372
319	chromosome 20 open reading frame 112	C20orf112	A_23_P303548	16.6398	2.73712e-36	5.27135e-34	2.92366
5366	proline rich 15-like	PRR15L	NM_024320_1_1054	5.78905	1.05475e-07	8.42794e-07	2.92094
2403	chemokine (C-X-C motif) ligand 9	CXCL9	A_23_P18452	9.68562	8.27805e-16	1.67342e-14	2.92
1176	similar to protein kinase, DNA-activated, catalytic polypeptide	LOC731751	A_32_P25206*	13.9675	3.58619e-23	1.62458e-21	2.91954
1902	syntaxin 6	STX6	A_23_P97725	11.2418	2.87726e-18	7.6399e-17	2.91943
2437	zyg-11 homolog A (C. elegans)	ZYG11A	A_32_P132589	9.61196	1.06811e-15	2.13053e-14	2.90903
1035	ADAM metallopeptidase domain 19 (meltrin beta)	ADAM19	A_23_P374074	13.9342	1.08642e-24	5.65196e-23	2.90242
1014	hypothetical LOC100127925	LOC100127925	A_23_P84754	14.1306	5.53586e-25	2.95608e-23	2.90084
651	SRY (sex determining region Y)-box 12	SOX12	A_23_P131887	16.6669	9.46504e-30	8.32107e-28	2.90011
2521	hypothetical protein LOC645249	LOC645249	A_32_P185319	8.88312	2.10595e-15	4.05439e-14	2.89971
712	golgi membrane protein 1	GOLM1	A_24_P394865	14.7724	6.19194e-29	4.95368e-27	2.89258
1926	annexin A9	ANXA9	NM_003568_1_1238	9.77246	3.67296e-18	9.62619e-17	2.89234
348	shugoshin-like 1 (S. pombe)	SGOL1	A_24_P225970	19.2671	2.00065e-35	3.47915e-33	2.89079
678	hypothetical LOC641518	LOC641518	A_24_P213785	16.2352	2.35036e-29	1.97414e-27	2.88986
972	FYVE, RhoGEF and PH domain containing 3	FGD3	A_23_P134980	13.7408	1.73384e-25	9.77028e-24	2.88942
3255	claudin 7	CLDN7	NM_001307_2_794	8.66696	7.03793e-13	1.01516e-11	2.8846
182	histone cluster 1, H2bh	HIST1H2BH	A_23_P366214	19.4834	2.93714e-41	1.1452e-38	2.88397
3906	ATPase, Ca++ transporting, type 2C, member 2	ATP2C2	A_23_P117993	7.42956	5.57518e-11	6.41734e-10	2.88308
550	minichromosome maintenance complex component 2	MCM2	A_23_P250808	17.8103	4.72966e-31	4.93034e-29	2.88225
214	polo-like kinase 1 (Drosophila)	PLK1	A_23_P118175	22.2417	9.03682e-40	2.89395e-37	2.88196
3480	myoglobin	MB	NM_005368_1_206	8.101	3.62006e-12	4.80612e-11	2.87952
458	isocitrate dehydrogenase 2 (NADP+), mitochondrial	IDH2	A_23_P129204	16.9444	8.50969e-33	1.07948e-30	2.87944
1938	metallothionein-like 5, testis-specific (tesmin)	MTL5	A_24_P25234	10.909	4.13917e-18	1.0787e-16	2.87879
2088	calcium channel, voltage-dependent, gamma subunit 1	CACNG1	A_23_P89302	9.53182	2.6716e-17	6.33403e-16	2.87767
640	hepatoma-derived growth factor	HDGF	A_24_P376707	17.6065	6.16072e-30	5.52541e-28	2.87623
792	immediate early response 5-like	IER5L	A_24_P383450	15.9264	8.9699e-28	6.33267e-26	2.86684
1855	bone morphogenetic protein receptor, type IB	BMPR1B	A_24_P63380	9.567	1.47721e-18	4.04415e-17	2.86279
47	timeless homolog (Drosophila)	TIMELESS	A_23_P53276	25.4839	3.11141e-51	5.23863e-48	2.86189
891	chromosome 11 open reading frame 82	C11orf82	A_23_P429491	14.7498	1.35274e-26	8.47829e-25	2.85088
580	G-protein signaling modulator 2 (AGS3-like, C. elegans)	GPSM2	A_23_P63402	16.2483	9.96616e-31	9.8705e-29	2.85017
1151	HMP19 protein	HMP19	A_23_P319000	11.2118	1.89789e-23	8.79113e-22	2.84815
1880	nebulette	NEBL	A_23_P104527	11.2375	1.89983e-18	5.13536e-17	2.84684
2247	mex-3 homolog A (C. elegans)	MEX3A	A_32_P96036	9.82946	1.5822e-16	3.45897e-15	2.83883
964	histone cluster 1, H2bn	HIST1H2BN	A_23_P402081	14.2464	1.52794e-25	8.66273e-24	2.83624
1303	C-type lectin domain family 5, member A	CLEC5A	A_23_P71165	13.0795	3.34444e-22	1.36634e-20	2.83619
3504	tubulin, alpha 3d	TUBA3D	A_23_P56737	7.69972	4.14597e-12	5.4671e-11	2.82239
549	cell division cycle 7 homolog (S. cerevisiae)	CDC7	NM_003503_2_2779	15.9259	4.38574e-31	4.58472e-29	2.82167
917	fibroblast growth factor receptor 3	FGFR3	A_23_P212837	13.059	3.21028e-26	1.94406e-24	2.82107
4908	F-box and leucine-rich repeat protein 16	FBXL16	A_23_P406385	6.12244	1.56912e-08	1.37751e-07	2.8207
455	histone cluster 1, H2bo	HIST1H2BO	A_23_P59069	17.0524	7.62944e-33	9.72255e-31	2.81996
3643	insulinoma-associated 1	INSM1	NM_002196_1_2322	7.26735	1.13044e-11	1.41239e-10	2.81676
2136	deiodinase, iodothyronine, type I	DIO1	A_23_P45805	9.70023	4.48934e-17	1.03888e-15	2.81562
579	oxidized low density lipoprotein (lectin-like) receptor 1	OLR1	A_23_P162634	16.3389	9.80983e-31	9.72434e-29	2.81182
1491	proline rich 15	PRR15	A_23_P431346	12.2946	6.73821e-21	2.37178e-19	2.80807
707	Rho GTPase activating protein 39	ARHGAP39	A_23_P424878	16.8094	5.17827e-29	4.17883e-27	2.80788
1216	cytochrome b-561	CYB561	A_23_P218331	13.8642	6.12454e-23	2.69536e-21	2.80704
777	H2B histone family, member S	H2BFS	A_23_P40464	15.1731	5.79803e-28	4.17289e-26	2.80615
483	histone cluster 1, H2ab	HIST1H2AB	A_23_P251633	17.3317	2.34458e-32	2.82577e-30	2.80543
705	signal transducer and activator of transcription 1, 91kDa	STAT1	A_24_P274270	15.0302	5.00028e-29	4.04106e-27	2.80375
386	Williams-Beuren syndrome chromosome region 28	WBSCR28	A_23_P418274	15.7929	1.66683e-34	2.55833e-32	2.80185
591	adenosine deaminase, RNA-specific	ADAR	A_23_P200438	18.0204	1.47231e-30	1.42764e-28	2.80048
2479	solute carrier family 1 (glial high affinity glutamate transporter), member 2	SLC1A2	A_23_P162067	9.12877	1.60426e-15	3.13635e-14	2.79958
1017	chromosome 18 open reading frame 56	C18orf56	A_24_P238496	13.188	6.76479e-25	3.59333e-23	2.79386
384	transmembrane protein 145	TMEM145	A_23_P67127	15.7133	1.3944e-34	2.15507e-32	2.79381
1434	protocadherin 17	PCDH17	A_23_P205057	13.1425	2.94389e-21	1.08322e-19	2.79361
1331	KIAA1257	KIAA1257	A_32_P163739*	11.2183	4.8192e-22	1.9333e-20	2.79352
1332	hypothetical protein LOC100132731	LOC100132731	A_32_P163739*	11.2183	4.8192e-22	1.9333e-20	2.79352
105	polo-like kinase 4 (Drosophila)	PLK4	A_23_P155971	22.0063	1.12178e-44	7.55491e-42	2.79341
57	abhydrolase domain containing 2	ABHD2	A_23_P140591	21.2345	1.54685e-48	2.04631e-45	2.79045
1550	aryl-hydrocarbon receptor nuclear translocator 2	ARNT2	NM_014862_1_5619	11.2736	1.73278e-20	5.81902e-19	2.78936
264	taperin	TPRN	A_23_P323832	19.1102	5.50265e-38	1.35281e-35	2.78883
213	Kazal-type serine peptidase inhibitor domain 1	KAZALD1	A_24_P192727	15.9799	8.50222e-40	2.73061e-37	2.78669
794	chloride channel CLIC-like 1	CLCC1	NKI_NM_013296*	15.05	9.69257e-28	6.82552e-26	2.78511
2544	kinesin family member 1A	KIF1A	A_23_P395454	8.53552	2.56584e-15	4.88476e-14	2.78343
226	cadherin, EGF LAG seven-pass G-type receptor 3 (flamingo homolog, Drosophila)	CELSR3	A_23_P92093	16.7506	2.54273e-39	7.59559e-37	2.78136
292	histone cluster 3, H2a	HIST3H2A	A_23_P149301	17.7211	4.04623e-37	8.74764e-35	2.78084
636	LY6/PLAUR domain containing 1	LYPD1	A_32_P101030	15.8538	5.84691e-30	5.27804e-28	2.77475
2046	hepsin	HPN	A_23_P101806	10.0158	1.55604e-17	3.7986e-16	2.77444
2302	HECT, UBA and WWE domain containing 1	HUWE1	A_24_P932016	10.3669	2.9035e-16	6.14798e-15	2.77268
145	histone cluster 2, H2ac	HIST2H2AC	A_24_P8723	19.1668	1.00554e-42	5.03327e-40	2.77248
2090	RAB11 family interacting protein 4 (class II)	RAB11FIP4	A_24_P401909	10.9811	2.7767e-17	6.5692e-16	2.77205
564	histone cluster 1, H2be	HIST1H2BE	A_23_P30776	15.8395	5.54229e-31	5.67105e-29	2.77032
1206	G protein-coupled receptor 68	GPR68	A_24_P931443	13.0958	5.54896e-23	2.45371e-21	2.76899
397	musashi homolog 2 (Drosophila)	MSI2	A_23_P369479	16.6988	2.68207e-34	4.00054e-32	2.76818
395	solute carrier family 35 (UDP-galactose transporter), member A2	SLC35A2	A_24_P310616	20.7324	2.33352e-34	3.50416e-32	2.7634
1290	hypothetical protein LOC100129652	LOC100129652	A_23_P19590*	13.4965	2.80457e-22	1.15641e-20	2.76233
121	ubiquitin associated protein 2-like	UBAP2L	A_24_P933838	22.3913	3.10157e-44	1.863e-41	2.76048
2639	chromosome 12 open reading frame 28	C12orf28	A_32_P424761	8.97057	4.93722e-15	9.07591e-14	2.76006
7365	cadherin 1, type 1, E-cadherin (epithelial)	CDH1	A_23_P206359	3.8574	0.00013649	0.000739071	2.75763
2004	chromosome 10 open reading frame 88 pseudogene	LOC399815	A_32_P17367	10.4251	9.722e-18	2.4321e-16	2.75668
3683	chromosome 8 open reading frame 85	C8orf85	A_32_P181527	7.5312	1.4492e-11	1.78694e-10	2.75613
3724	chromosome 2 open reading frame 54	C2orf54	A_23_P60990	7.42277	1.74442e-11	2.1304e-10	2.75565
1123	chromosome 6 open reading frame 154	C6orf154	A_24_P737939	13.2407	1.14543e-23	5.42093e-22	2.75517
2233	collagen, type V, alpha 1	COL5A1	NM_000093_2_5820	10.154	1.44381e-16	3.17326e-15	2.7536
4712	S100 calcium binding protein A7A	S100A7A	A_23_P103304*	6.07487	5.7995e-09	5.33315e-08	2.74661
4713	S100 calcium binding protein A7	S100A7	A_23_P103304*	6.07487	5.7995e-09	5.33315e-08	2.74661
342	kinesin family member 4B	KIF4B	A_24_P273038	20.3053	1.31036e-35	2.32978e-33	2.74445
578	neuropeptide W	NPW	A_23_P352799	13.447	9.05748e-31	9.0107e-29	2.74401
518	calcium activated nucleotidase 1	CANT1	A_24_P116669	16.8077	1.26021e-31	1.39759e-29	2.74334
3651	N-acetyltransferase 2 (arylamine N-acetyltransferase)	NAT2	A_23_P31798	7.31688	1.17488e-11	1.46413e-10	2.74251
3367	poliovirus receptor-related 4	PVRL4	A_23_P46440	8.37658	1.6675e-12	2.30757e-11	2.74223
4054	polycystic kidney disease 2-like 1	PKD2L1	A_23_P12552	7.37054	1.41925e-10	1.56243e-09	2.74062
2477	SIX homeobox 2	SIX2	A_24_P191445	9.40167	1.58428e-15	3.09892e-14	2.73407
256	tissue specific transplantation antigen P35B	TSTA3	A_23_P94300	19.9333	3.00207e-38	7.61642e-36	2.73143
1433	calcyphosine-like	CAPSL	A_23_P133536	10.8944	2.81331e-21	1.03758e-19	2.73116
2307	keratin 8	KRT8	A_23_P14072	10.2243	3.06138e-16	6.46996e-15	2.73069
4772	MARVEL domain containing 3	MARVELD3	A_23_P152426	6.47681	7.82415e-09	7.09691e-08	2.72935
1401	DNA replication helicase 2 homolog (yeast)	DNA2	A_24_P366107	12.8477	1.62854e-21	6.17851e-20	2.72495
4295	transmembrane channel-like 4	TMC4	A_23_P330460	7.02018	5.9676e-10	6.11581e-09	2.7234
698	mitogen-activated protein kinase 8 interacting protein 2	MAPK8IP2	A_23_P502070	14.0626	4.1604e-29	3.38941e-27	2.72321
3424	transcription factor AP-2 alpha (activating enhancer binding protein 2 alpha)	TFAP2A	A_32_P14187	8.34525	2.43485e-12	3.30122e-11	2.72316
1006	biglycan	BGN	A_23_P34128	14.8839	4.33437e-25	2.34037e-23	2.72276
723	RAD51 associated protein 1	RAD51AP1	A_23_P99292	14.9864	8.27749e-29	6.5143e-27	2.71935
4732	potassium inwardly-rectifying channel, subfamily J, member 3	KCNJ3	A_23_P153986	6.03245	6.2557e-09	5.73085e-08	2.71889
3013	Fc fragment of IgG, high affinity Ia, receptor (CD64)	FCGR1A	A_23_P63393*	9.13425	1.12336e-13	1.77518e-12	2.71688
3014	Fc fragment of IgG, high affinity Ib, receptor (CD64)	FCGR1B	A_23_P63393*	9.13425	1.12336e-13	1.77518e-12	2.71688
1487	B-cell CLL/lymphoma 9	BCL9	A_23_P382602	12.5797	6.58394e-21	2.32262e-19	2.71544
196	histone cluster 1, H2bb	HIST1H2BB	A_23_P111054	18.8405	1.06667e-40	3.8113e-38	2.7154
2668	ADAM metallopeptidase domain 12	ADAM12	NM_003474_2_4965	9.32547	6.97443e-15	1.26389e-13	2.71274
753	interleukin 21 receptor	IL21R	A_24_P227928	14.9222	2.78558e-28	2.0915e-26	2.71001
1220	lipolysis stimulated lipoprotein receptor	LSR	A_23_P142389	14.2014	6.59633e-23	2.89267e-21	2.70684
1870	RAD52 motif 1	RDM1	A_23_P141450	11.0042	1.68549e-18	4.58275e-17	2.70532
451	cyclin F	CCNF	A_23_P37954	19.0538	6.21886e-33	7.98911e-31	2.70357
444	deoxyribonuclease I	DNASE1	A_23_P66311	16.1557	3.48974e-33	4.60012e-31	2.70319
2054	tight junction protein 3 (zona occludens 3)	TJP3	A_23_P108157	11.1416	1.68376e-17	4.09061e-16	2.70314
3249	NADPH oxidase organizer 1	NOXO1	A_23_P413051	8.18413	6.79533e-13	9.82203e-12	2.70135
268	G protein-coupled receptor 84	GPR84	A_23_P25156	17.829	6.46915e-38	1.56959e-35	2.70125
3629	POTE ankyrin domain family, member F	POTEF	A_24_P357955*	7.43989	9.89477e-12	1.24354e-10	2.69951
3630	POTE ankyrin domain family, member E	POTEE	A_24_P357955*	7.43989	9.89477e-12	1.24354e-10	2.69951
276	vacuolar protein sorting 13 homolog B (yeast)	VPS13B	A_23_P20298	20.8943	1.18503e-37	2.75489e-35	2.69881
242	histone cluster 1, H2ah	HIST1H2AH	A_23_P81867	17.8844	1.01125e-38	2.71433e-36	2.69553
3	L antigen family, member 3	LAGE3	A_23_P73758	26.7352	1.23447e-69	4.5726e-65	2.69436
448	RUN and SH3 domain containing 1	RUSC1	A_24_P2943	18.6374	5.03314e-33	6.51103e-31	2.69268
54	tripartite motif-containing 59	TRIM59	A_23_P91900*	21.9264	9.61466e-49	1.30294e-45	2.68358
55	structural maintenance of chromosomes 4	SMC4	A_23_P91900*	21.9264	9.61466e-49	1.30294e-45	2.68358
1231	v-erb-b2 erythroblastic leukemia viral oncogene homolog 3 (avian)	ERBB3	A_24_P918970	13.0743	9.14738e-23	3.95673e-21	2.68116
1799	caspase recruitment domain family, member 14	CARD14	A_23_P320070	11.4994	7.11908e-19	2.01964e-17	2.67984
176	CDC42 small effector 1	CDC42SE1	A_24_P110663	22.8847	2.20366e-41	8.90463e-39	2.67731
1204	tribbles homolog 3 (Drosophila)	TRIB3	A_23_P210690	13.1648	5.41821e-23	2.39971e-21	2.67467
32	similar to L antigen family, member 3	LOC646808	A_24_P409117	23.8711	1.79418e-53	4.33424e-50	2.6714
459	interferon regulatory factor 7	IRF7	A_24_P378022	16.926	8.66544e-33	1.09673e-30	2.66713
49	flap structure-specific endonuclease 1	FEN1	NM_004111_4_2139	22.9956	5.18628e-51	8.35239e-48	2.66285
3165	cadherin 2, type 1, N-cadherin (neuronal)	CDH2	A_23_P38724	8.30753	3.6875e-13	5.49801e-12	2.66276
28	thymopoietin	TMPO	A_24_P210244	22.8632	4.23911e-54	1.14893e-50	2.66096
870	CD3e molecule, epsilon associated protein	CD3EAP	A_24_P267452*	15.0623	7.38466e-27	4.75162e-25	2.66041
871	excision repair cross-complementing rodent repair deficiency, complementation group 1 (includes overlapping antisense sequence)	ERCC1	A_24_P267452*	15.0623	7.38466e-27	4.75162e-25	2.66041
516	apolipoprotein B mRNA editing enzyme, catalytic polypeptide-like 3D	APOBEC3D	A_23_P369970	14.6453	1.15051e-31	1.28105e-29	2.65677
142	similar to hCG1644442	LOC203510	A_24_P195286	20.1142	5.43093e-43	2.83334e-40	2.65607
497	tubulin, alpha 1c	TUBA1C	A_24_P188073	18.3013	4.63106e-32	5.38303e-30	2.65526
983	FK506 binding protein 4, 59kDa	FKBP4	A_23_P128367	14.6197	2.16219e-25	1.20617e-23	2.6548
2187	apolipoprotein B mRNA editing enzyme, catalytic polypeptide-like 3F	APOBEC3F	A_23_P369966	9.93388	8.2602e-17	1.85885e-15	2.65139
3828	fibronectin type III domain containing 1	FNDC1	A_23_P407840	7.76129	3.38447e-11	3.99673e-10	2.6504
365	histone cluster 1, H2bk	HIST1H2BK	A_23_P145237	16.1129	4.65682e-35	7.65503e-33	2.64784
336	breast carcinoma amplified sequence 4	BCAS4	A_32_P199319	17.4466	1.15614e-35	2.07215e-33	2.64776
488	ATPase, aminophospholipid transporter, class I, type 8B, member 1	ATP8B1	A_23_P107599	17.5398	2.83452e-32	3.37962e-30	2.64632
1815	interferon, alpha-inducible protein 6	IFI6	A_23_P201450	10.639	8.04021e-19	2.26649e-17	2.64477
1968	nucleotide-binding oligomerization domain containing 2	NOD2	A_23_P420863	10.5677	6.05852e-18	1.54911e-16	2.64365
3022	fatty acid desaturase 2	FADS2	A_23_P98581	8.8296	1.1647e-13	1.83712e-12	2.64364
570	shugoshin-like 2 (S. pombe)	SGOL2	A_23_P411335	17.2637	7.30179e-31	7.35627e-29	2.64192
4461	family with sequence similarity 196, member A	FAM196A	A_32_P202014	6.41467	1.55165e-09	1.51955e-08	2.6415
1329	zinc finger, MYND-type containing 10	ZMYND10	A_23_P29663	11.5867	4.62553e-22	1.85829e-20	2.63967
414	chromosome 12 open reading frame 48	C12orf48	A_23_P87769	17.8157	8.27869e-34	1.18398e-31	2.6394
966	proline rich 7 (synaptic)	PRR7	A_24_P20806	14.8203	1.5681e-25	8.87684e-24	2.63786
754	plasminogen activator, urokinase receptor	PLAUR	NM_002659_1_1016	15.3669	2.83002e-28	2.12343e-26	2.63427
204	centromere protein M	CENPM	A_24_P399888	20.9217	3.45334e-40	1.16286e-37	2.63285
6156	transmembrane protein 125	TMEM125	A_23_P115022	4.98831	2.54073e-06	1.72459e-05	2.63195
4952	FXYD domain containing ion transport regulator 3	FXYD3	NM_021910_1_1291	6.19452	1.85678e-08	1.61537e-07	2.62999
3983	serine peptidase inhibitor, Kunitz type, 2	SPINT2	A_23_P27795	7.60942	9.12768e-11	1.02558e-09	2.6299
1159	ENTH domain containing 1	ENTHD1	A_23_P410117	12.4871	2.12894e-23	9.81231e-22	2.62859
75	stathmin 1	STMN1	A_23_P200866	19.3679	8.39194e-47	8.40124e-44	2.62855
2982	kynurenine 3-monooxygenase (kynurenine 3-hydroxylase)	KMO	A_24_P77082	8.58221	8.59278e-14	1.37706e-12	2.62795
3888	epithelial splicing regulatory protein 2	ESRP2	A_23_P100222	7.69073	5.0219e-11	5.81664e-10	2.62721
495	2'-5'-oligoadenylate synthetase 3, 100kDa	OAS3	A_24_P335305	16.2506	4.0536e-32	4.73657e-30	2.62559
1785	interleukin 4 induced 1	IL4I1	A_23_P502520	11.7265	6.28157e-19	1.79257e-17	2.62437
5473	chromosome 15 open reading frame 48	C15orf48	A_23_P26024	5.61601	1.72178e-07	1.34078e-06	2.62401
940	sperm associated antigen 1	SPAG1	A_24_P158157	14.379	6.19338e-26	3.63757e-24	2.62359
2765	beta-1,4-N-acetyl-galactosaminyl transferase 4	B4GALNT4	A_23_P344000	9.4183	1.42345e-14	2.48903e-13	2.62145
1390	protein phosphatase, Mg2+/Mn2+ dependent, 1J	PPM1J	A_23_P201939	11.83	1.28552e-21	4.92759e-20	2.6196
1513	carbohydrate (N-acetylglucosamine 6-O) sulfotransferase 6	CHST6	A_23_P106925	11.0444	8.93393e-21	3.09852e-19	2.61755
627	ets variant 7	ETV7	A_23_P42347	15.2422	4.21354e-30	3.85684e-28	2.61704
2404	armadillo repeat containing 3	ARMC3	A_23_P86540	9.02149	8.3443e-16	1.68498e-14	2.6164
521	dopey family member 2	DOPEY2	NM_005128_1_7006	17.225	1.59343e-31	1.75662e-29	2.61566
815	mannosidase, endo-alpha-like	MANEAL	A_23_P391228	14.1581	1.70789e-27	1.17224e-25	2.61436
1036	chromobox homolog 4 (Pc class homolog, Drosophila)	CBX4	A_23_P89623	14.2564	1.08657e-24	5.65009e-23	2.60879
667	dipeptidyl-peptidase 3	DPP3	A_23_P116082*	16.9613	1.6309e-29	1.39408e-27	2.60721
668	Bardet-Biedl syndrome 1	BBS1	A_23_P116082*	16.9613	1.6309e-29	1.39408e-27	2.60721
178	CTP synthase II	CTPS2	A_23_P10305	19.6186	2.34223e-41	9.32888e-39	2.6038
1794	KIAA0319	KIAA0319	A_23_P168316	10.3245	6.96915e-19	1.98014e-17	2.60217
708	distal-less homeobox 4	DLX4	A_23_P164196	14.0742	5.33222e-29	4.29683e-27	2.60186
2336	fibroblast activation protein, alpha	FAP	A_23_P56746	9.76492	4.15975e-16	8.66762e-15	2.59996
2363	leucine rich repeat containing 56	LRRC56	A_23_P368996	9.91389	5.50698e-16	1.13157e-14	2.59876
820	pre-B-cell leukemia homeobox 1	PBX1	A_23_P62948	14.7904	1.9718e-27	1.34672e-25	2.59813
3107	cAMP responsive element binding protein 3-like 4	CREB3L4	A_23_P63232	8.66219	2.5243e-13	3.8431e-12	2.59601
474	histone cluster 2, H2be	HIST2H2BE	A_24_P148321	14.7428	1.84589e-32	2.26904e-30	2.59572
1659	nephronectin	NPNT	A_32_P174978	10.8159	8.59425e-20	2.65874e-18	2.59504
4002	SRY (sex determining region Y)-box 11	SOX11	A_24_P302584	7.09765	1.03257e-10	1.15295e-09	2.59358
1834	troponin I type 3 (cardiac)	TNNI3	A_23_P67453	9.56287	1.07614e-18	2.9896e-17	2.59322
2164	epithelial stromal interaction 1 (breast)	EPSTI1	A_23_P105797	10.2319	6.45442e-17	1.46974e-15	2.59294
2234	kelch domain containing 7B	KLHDC7B	A_24_P117410	9.47449	1.44496e-16	3.17453e-15	2.59208
1618	cadherin 11, type 2, OB-cadherin (osteoblast)	CDH11	NM_033664_1_2938	11.5348	5.2874e-20	1.6792e-18	2.58446
72	ribonuclease H2, subunit A	RNASEH2A	A_23_P164827	24.6214	3.96292e-47	4.11562e-44	2.58409
4778	tetratricopeptide repeat domain 39A	TTC39A	A_23_P160214	6.35915	7.99673e-09	7.24222e-08	2.58273
2055	breast carcinoma amplified sequence 1	BCAS1	A_23_P17420	9.42995	1.69934e-17	4.12664e-16	2.58037
1316	lethal giant larvae homolog 2 (Drosophila)	LLGL2	A_23_P129738	13.4019	4.0086e-22	1.6204e-20	2.57984
1795	CUB domain containing protein 1	CDCP1	A_24_P160401	11.6385	7.00937e-19	1.99106e-17	2.57914
201	RAD54 homolog B (S. cerevisiae)	RAD54B	A_23_P82738	18.1989	2.68886e-40	9.19365e-38	2.57837
6150	ovo-like 2 (Drosophila)	OVOL2	A_23_P143348	5.00733	2.48562e-06	1.68925e-05	2.57609
383	UDP-galactose-4-epimerase	GALE	A_23_P160148	18.0242	1.28363e-34	1.98665e-32	2.57539
859	leucine rich repeat containing 45	LRRC45	A_23_P381461	15.6432	5.40592e-27	3.51917e-25	2.57458
4672	fibrous sheath interacting protein 1	FSIP1	A_23_P353125	6.1357	4.67643e-09	4.34389e-08	2.57
107	ROD1 regulator of differentiation 1 (S. pombe)	ROD1	A_24_P295452	23.4768	1.16585e-44	7.75762e-42	2.56899
3843	GATA binding protein 3	GATA3	A_23_P75056	7.34317	3.62204e-11	4.26323e-10	2.56673
571	low density lipoprotein receptor-related protein 8, apolipoprotein e receptor	LRP8	A_23_P200222	13.9502	7.63166e-31	7.67469e-29	2.56649
78	hematological and neurological expressed 1-like	HN1L	A_23_P434900	23.1887	1.63736e-46	1.56852e-43	2.56548
833	KIAA1524	KIAA1524	A_23_P250313	14.2459	2.71503e-27	1.82961e-25	2.56539
840	solute carrier family 2 (facilitated glucose transporter), member 1	SLC2A1	NM_006516_1_2663	14.0458	3.28996e-27	2.1997e-25	2.56527
525	rhophilin, Rho GTPase binding protein 1	RHPN1	A_23_P315382	16.9597	1.98701e-31	2.17325e-29	2.56356
999	solute carrier family 11 (proton-coupled divalent metal ion transporters), member 1	SLC11A1	A_24_P76831	14.17	3.58371e-25	1.95212e-23	2.56117
757	solute carrier family 39 (zinc transporter), member 4	SLC39A4	A_23_P20502	14.3776	3.05952e-28	2.28329e-26	2.55972
3001	leucine rich repeat containing 8 family, member E	LRRC8E	A_23_P90030	9.16779	1.0184e-13	1.61667e-12	2.5588
4561	similar to protein expressed in prostate, ovary, testis, and placenta 2	LOC653269	A_24_P237804*	6.35959	2.51132e-09	2.40594e-08	2.55835
4562	similar to protein expressed in prostate, ovary, testis, and placenta 2	LOC653781	A_24_P237804*	6.35959	2.51132e-09	2.40594e-08	2.55835
574	Zwilch, kinetochore associated, homolog (Drosophila)	ZWILCH	A_23_P112673	17.6479	8.32252e-31	8.32425e-29	2.55832
2609	hypothetical protein LOC388564	LOC388564	A_32_P92168	9.88185	4.15472e-15	7.71532e-14	2.5572
11	secretin	SCT	A_23_P104594	23.9337	1.94389e-61	1.54294e-57	2.55124
858	ermin, ERM-like protein	ERMN	A_23_P102017	12.8219	5.19034e-27	3.38478e-25	2.55021
2156	ATP-binding cassette, sub-family C (CFTR/MRP), member 13, pseudogene	ABCC13	A_23_P166207	8.91321	5.71068e-17	1.30708e-15	2.54978
401	tigger transposable element derived 3	TIGD3	A_23_P415663	17.6872	3.4195e-34	5.0396e-32	2.54712
2925	sushi domain containing 4	SUSD4	A_23_P201062	8.6085	5.9436e-14	9.72281e-13	2.54677
1674	semaphorin 7A, GPI membrane anchor (John Milton Hagen blood group)	SEMA7A	A_23_P106389	12.0731	1.08186e-19	3.32191e-18	2.54657
575	CTF18, chromosome transmission fidelity factor 18 homolog (S. cerevisiae)	CHTF18	A_23_P354297	17.4958	8.64725e-31	8.6335e-29	2.54117
896	SIX homeobox 4	SIX4	A_32_P204203	13.823	1.64777e-26	1.0258e-24	2.54115
908	cortexin 1	CTXN1	A_23_P336335	15.691	2.44697e-26	1.49733e-24	2.54055
1770	NEL-like 2 (chicken)	NELL2	A_23_P10025	9.60276	4.69178e-19	1.3556e-17	2.54022
594	tubulin tyrosine ligase-like family, member 12	TTLL12	A_23_P143749	15.7116	1.56193e-30	1.50665e-28	2.53522
2393	versican	VCAN	A_23_P144959	9.73782	7.09849e-16	1.44417e-14	2.53426
441	sterile alpha motif domain containing 14	SAMD14	A_24_P185186	18.6649	3.17259e-33	4.22213e-31	2.5292
531	chromodomain protein, Y-like 2	CDYL2	A_23_P371865	15.5902	2.76621e-31	2.9757e-29	2.5289
835	chromosome 4 open reading frame 48	C4orf48	A_32_P90045	14.3036	3.03647e-27	2.03757e-25	2.52824
424	cell division cycle 25 homolog A (S. pombe)	CDC25A	A_24_P397107	16.5254	1.47432e-33	2.05045e-31	2.52693
615	synaptonemal complex central element protein 2	SYCE2	A_32_P203528	15.6008	2.92445e-30	2.72401e-28	2.52524
388	Rac GTPase activating protein 1 pseudogene	RACGAP1P	A_23_P65040	17.8319	1.80335e-34	2.75267e-32	2.52504
542	F11 receptor	F11R	A_24_P319369	16.3254	3.42435e-31	3.63442e-29	2.5238
2123	cytoskeleton-associated protein 4	CKAP4	A_23_P48056	10.7713	3.80961e-17	8.87496e-16	2.52305
139	H2A histone family, member X	H2AFX	A_23_P47370	21.5038	4.04688e-43	2.15168e-40	2.52291
3776	histone cluster 1, H1a	HIST1H1A	A_23_P70448	7.13199	2.42359e-11	2.91374e-10	2.51956
3788	CDP-diacylglycerol synthase (phosphatidate cytidylyltransferase) 1	CDS1	A_23_P7250	7.82296	2.57532e-11	3.0868e-10	2.51817
80	RALBP1 associated Eps domain containing 2	REPS2	A_23_P251387	18.0121	1.99267e-46	1.87654e-43	2.51733
2657	keratin 8 pseudogene 12	KRT8P12	AL133645_1_1020	9.44236	6.09866e-15	1.11153e-13	2.51034
1041	microtubule associated monoxygenase, calponin and LIM domain containing 2	MICAL2	A_23_P24843	14.1452	1.21149e-24	6.27327e-23	2.50997
1936	carcinoembryonic antigen-related cell adhesion molecule 3	CEACAM3	A_23_P130520	9.66936	4.11912e-18	1.07423e-16	2.50703
4117	vav 3 guanine nucleotide exchange factor	VAV3	A_24_P7954	7.15076	1.96863e-10	2.12843e-09	2.50399
4777	collagen, type III, alpha 1	COL3A1	A_24_P935491	6.41342	7.92586e-09	7.18096e-08	2.5038
1211	matrix metallopeptidase 14 (membrane-inserted)	MMP14	A_23_P205504	12.8932	5.77853e-23	2.55015e-21	2.49857
2332	hypothetical protein LOC284804	LOC284804	A_24_P101800	9.58522	3.95756e-16	8.26025e-15	2.49773
637	F-box and leucine-rich repeat protein 18	FBXL18	A_23_P19922	16.477	6.03444e-30	5.43408e-28	2.49761
1395	T cell immunoreceptor with Ig and ITIM domains	TIGIT	A_23_P80529	11.5874	1.34232e-21	5.1347e-20	2.49617
3637	GDNF family receptor alpha 1	GFRA1	A_32_P59544	7.12621	1.06633e-11	1.33559e-10	2.49585
4844	neurogenin 3	NEUROG3	A_23_P35534	6.30638	1.11e-08	9.90179e-08	2.4955
3234	carcinoembryonic antigen-related cell adhesion molecule 8	CEACAM8	A_23_P50882	8.0018	5.86404e-13	8.53477e-12	2.49529
566	membrane bound O-acyltransferase domain containing 7	MBOAT7	A_23_P208517	17.3207	5.66158e-31	5.77715e-29	2.49496
2918	heparanase	HPSE	A_23_P256107	8.99371	5.57176e-14	9.14821e-13	2.49395
1984	solute carrier family 7, (cationic amino acid transporter, y+ system) member 11	SLC7A11	A_32_P165472	10.249	7.97004e-18	2.0156e-16	2.49221
1361	chromatin assembly factor 1, subunit B (p60)	CHAF1B	A_23_P57307	12.776	7.83054e-22	3.07475e-20	2.49086
168	cytoskeleton associated protein 2	CKAP2	NM_018204_2_2727	20.6416	1.15859e-41	4.91397e-39	2.4902
1773	spermatogenesis associated 17	SPATA17	A_23_P346908	10.9616	4.86353e-19	1.40231e-17	2.49011
2065	cadherin 7, type 2	CDH7	A_23_P153146	9.44429	2.02123e-17	4.85738e-16	2.48928
1270	chromosome 19 open reading frame 51	C19orf51	A_23_P335485	12.1891	1.97714e-22	8.26895e-21	2.48904
1061	polymerase (DNA directed), gamma	POLG	A_32_P95723	14.2653	1.64287e-24	8.38205e-23	2.48314
2241	melanoma inhibitory activity family, member 3	MIA3	A_24_P323420	10.3163	1.52006e-16	3.33164e-15	2.48124
2936	serine peptidase inhibitor, Kazal type 4	SPINK4	A_23_P71877	8.18667	6.34911e-14	1.03481e-12	2.47744
555	prostaglandin F2 receptor negative regulator	PTGFRN	A_23_P114968	16.8385	5.17788e-31	5.36236e-29	2.4765
14	processing of precursor 1, ribonuclease P/MRP subunit (S. cerevisiae)	POP1	A_23_P341275	22.244	1.91982e-59	1.12282e-55	2.4746
746	dysbindin (dystrobrevin binding protein 1) domain containing 1	DBNDD1	A_23_P26435	15.8986	2.13309e-28	1.6202e-26	2.47427
189	WD repeat and HMG-box DNA binding protein 1	WDHD1	A_23_P25873	20.0567	5.72665e-41	2.14264e-38	2.47399
407	paroxysmal nonkinesigenic dyskinesia	PNKD	BC036457_1_2273	16.3707	5.52713e-34	8.00771e-32	2.47282
1743	envoplakin	EVPL	A_23_P106963	11.9564	2.91448e-19	8.57241e-18	2.46906
801	pro-melanin-concentrating hormone	PMCH	A_23_P321222*	14.5619	1.17159e-27	8.1778e-26	2.46895
2417	StAR-related lipid transfer (START) domain containing 10	STARD10	A_23_P36345	9.61538	9.0748e-16	1.82354e-14	2.46792
902	immunoglobulin superfamily, member 3	IGSF3	A_23_P126916	14.5215	2.12756e-26	1.30981e-24	2.46569
1527	protein phosphatase methylesterase 1	PPME1	A_24_P4705	12.11	1.27468e-20	4.35702e-19	2.4656
2487	myelin transcription factor 1	MYT1	A_23_P210835	8.72658	1.70664e-15	3.3248e-14	2.46398
489	beta-1,3-N-acetylgalactosaminyltransferase 2	B3GALNT2	A_23_P334751	16.7543	3.26743e-32	3.86262e-30	2.46254
5013	N-acetyltransferase 1 (arylamine N-acetyltransferase)	NAT1	A_23_P112904	5.772	2.45005e-08	2.10139e-07	2.46005
1245	cystatin S	CST4	A_23_P166137	11.8319	1.12225e-22	4.802e-21	2.45938
3388	synaptonemal complex protein 2	SYCP2	A_24_P333644	7.83908	1.90063e-12	2.60906e-11	2.45921
147	protein phosphatase 1, regulatory (inhibitor) subunit 14B	PPP1R14B	A_23_P365814	19.6816	1.3916e-42	6.84241e-40	2.45752
144	aspartyl-tRNA synthetase 2, mitochondrial	DARS2	A_23_P148984	20.8452	9.65698e-43	4.85571e-40	2.45702
300	CTP synthase	CTPS	NM_001905_1_2389	18.0426	6.58129e-37	1.3851e-34	2.4558
4933	V-set and immunoglobulin domain containing 10 like	VSIG10L	A_24_P655733	6.20419	1.70797e-08	1.49245e-07	2.45446
2673	egl nine homolog 3 (C. elegans)	EGLN3	A_23_P360379	8.95597	7.14278e-15	1.29314e-13	2.4486
408	proline/serine-rich coiled-coil 1	PSRC1	A_23_P46539	17.6141	5.81652e-34	8.416e-32	2.44838
2064	leucine rich repeat and Ig domain containing 1	LINGO1	A_24_P112941	9.60299	2.01342e-17	4.84279e-16	2.44806
1148	hypothetical protein LOC284889	LOC284889	A_23_P91619*	14.124	1.8909e-23	8.76607e-22	2.4478
1149	macrophage migration inhibitory factor (glycosylation-inhibiting factor)	MIF	A_23_P91619*	14.124	1.8909e-23	8.76607e-22	2.4478
900	dynein, axonemal, heavy chain 14	DNAH14	A_23_P333951	14.6873	2.01276e-26	1.24189e-24	2.4461
2216	aggrecan	ACAN	A_23_P206032	10.2489	1.16682e-16	2.5901e-15	2.44589
309	aurora kinase B	AURKB	NM_004217_1_474	19.0694	1.64016e-36	3.28989e-34	2.4447
2659	formyl peptide receptor 3	FPR3	A_23_P208167	9.5039	6.1609e-15	1.12251e-13	2.43823
1478	chloride channel 5	CLCN5	A_23_P96340	12.2482	5.88058e-21	2.08976e-19	2.43691
490	sterile alpha motif domain containing 11	SAMD11	A_24_P402510	13.5049	3.34164e-32	3.94196e-30	2.43674
2871	killer cell lectin-like receptor subfamily G, member 2	KLRG2	A_32_P33263	8.40288	3.76279e-14	6.29433e-13	2.43295
3094	collagen, type I, alpha 2	COL1A2	A_24_P265274	8.54094	2.27909e-13	3.4889e-12	2.43094
2080	family with sequence similarity 84, member B	FAM84B	A_24_P943709	10.243	2.42666e-17	5.77427e-16	2.42812
1783	mucin 1, cell surface associated	MUC1	NM_002456_3_161	10.7744	6.24063e-19	1.78226e-17	2.42773
2698	golgin A3	GOLGA3	A_23_P98864	9.62525	8.26004e-15	1.48332e-13	2.42661
4720	LIM homeobox 1	LHX1	A_23_P78059	6.3475	6.00665e-09	5.51179e-08	2.42354
2822	solute carrier family 16, member 6 pseudogene	LOC440459	A_24_P731648	8.57033	2.39739e-14	4.09476e-13	2.42351
713	similar to protein phosphatase 1 regulatory subunit 14B	LOC729406	A_24_P349765	16.1625	6.50964e-29	5.20037e-27	2.42276
851	block of proliferation 1	BOP1	A_23_P43794*	14.6303	3.9645e-27	2.61452e-25	2.41935
852	similar to block of proliferation 1	LOC727967	A_23_P43794*	14.6303	3.9645e-27	2.61452e-25	2.41935
1184	holocarboxylase synthetase (biotin-(proprionyl-CoA-carboxylase (ATP-hydrolysing)) ligase)	HLCS	A_23_P132097	14.1282	3.94286e-23	1.77457e-21	2.41905
596	suppressor of cytokine signaling 7	SOCS7	A_32_P43711	15.8604	1.57496e-30	1.51659e-28	2.41854
430	GNAS complex locus	GNAS	A_24_P168574	15.0189	2.04376e-33	2.80381e-31	2.41681
389	ADP-ribosylation factor-like 6 interacting protein 1	ARL6IP1	A_24_P356218	18.503	1.86349e-34	2.84055e-32	2.41681
394	E2F transcription factor 8	E2F8	NM_024680_1_1600	17.3379	2.32127e-34	3.4952e-32	2.41552
4260	peroxidasin homolog (Drosophila)-like	PXDNL	A_24_P69489	6.98593	4.72507e-10	4.89799e-09	2.41472
1702	PRAME family member 19	PRAMEF19	A_24_P204686*	10.0278	1.56615e-19	4.73309e-18	2.41233
1703	PRAME family member 18	PRAMEF18	A_24_P204686*	10.0278	1.56615e-19	4.73309e-18	2.41233
577	ATPase, H+ transporting, lysosomal 21kDa, V0 subunit b	ATP6V0B	A_23_P137814	18.0062	8.963e-31	8.92469e-29	2.41021
1836	mal, T-cell differentiation protein 2	MAL2	A_23_P60130	10.9646	1.09351e-18	3.03633e-17	2.4095
510	MAP6 domain containing 1	MAP6D1	A_23_P80841	15.0795	8.93545e-32	1.01011e-29	2.40578
2519	RAS-like, family 11, member B	RASL11B	A_23_P69738	9.5568	2.09317e-15	4.03258e-14	2.4025
3266	DnaJ (Hsp40) homolog, subfamily C, member 5 beta	DNAJC5B	A_24_P355142	8.32699	7.54277e-13	1.08417e-11	2.40126
2711	forkhead box N4	FOXN4	A_32_P140028	8.49273	9.07757e-15	1.62279e-13	2.3989
470	ER degradation enhancer, mannosidase alpha-like 1	EDEM1	A_23_P40975	16.8353	1.73685e-32	2.14449e-30	2.39794
2971	synaptotagmin I	SYT1	A_32_P117966	8.03105	8.1371e-14	1.30875e-12	2.39755
909	ethanolaminephosphotransferase 1 (CDP-ethanolamine-specific)	EPT1	A_23_P68302	15.2994	2.55712e-26	1.56301e-24	2.3968
1663	transmembrane protein 92	TMEM92	A_23_P38388	10.7006	9.48596e-20	2.92726e-18	2.39438
885	ATPase family, AAA domain containing 5	ATAD5	A_23_P255750	14.4831	1.21714e-26	7.66303e-25	2.39281
1471	histone cluster 1, H4j	HIST1H4J	A_23_P30805	11.2483	5.17795e-21	1.84775e-19	2.39231
2282	serine incorporator 2	SERINC2	A_23_P147330	10.2245	2.4176e-16	5.17334e-15	2.39024
925	WD repeat domain 34	WDR34	A_23_P20823	15.5961	4.03874e-26	2.422e-24	2.38858
3977	EPH receptor A10	EPHA10	A_24_P930741	7.31746	8.85784e-11	9.96668e-10	2.38684
376	nuclear factor of kappa light polypeptide gene enhancer in B-cells inhibitor-like 2	NFKBIL2	A_23_P216355	17.678	8.59882e-35	1.36115e-32	2.38683
1276	chromatin licensing and DNA replication factor 1	CDT1	A_24_P176374	13.071	2.15444e-22	8.9733e-21	2.38444
3373	occludin pseudogene	LOC647859	A_24_P102053*	8.34326	1.75214e-12	2.41657e-11	2.38273
3374	occludin	OCLN	A_24_P102053*	8.34326	1.75214e-12	2.41657e-11	2.38273
2169	hypothetical LOC100130905	LOC100130905	A_23_P48058*	10.6681	6.62818e-17	1.50684e-15	2.38236
722	MAGI family member, X-linked	MAGIX	A_23_P84941	15.8057	8.2429e-29	6.49168e-27	2.38193
677	myocyte enhancer factor 2D	MEF2D	A_23_P334183	17.496	2.34161e-29	1.96977e-27	2.37936
2981	EPH receptor A8	EPHA8	A_24_P419236	8.23684	8.45876e-14	1.35676e-12	2.37813
38	poly (ADP-ribose) polymerase 1	PARP1	A_23_P114783	24.2371	9.84231e-53	2.0636e-49	2.37744
19	DEAD (Asp-Glu-Ala-Asp) box polypeptide 39	DDX39	A_23_P78660	24.7109	1.72874e-57	7.68412e-54	2.37604
2357	chemokine (C-X-C motif) ligand 10	CXCL10	A_23_P124884	10.3267	5.22516e-16	1.07725e-14	2.3735
221	cyclin E1	CCNE1	NM_001238_1_1283	16.7816	1.58723e-39	4.91302e-37	2.37349
285	adenosine A2a receptor	ADORA2A	A_23_P109436	16.0405	1.98942e-37	4.43026e-35	2.37343
4157	aquaporin 9	AQP9	A_23_P106366	6.97593	2.51647e-10	2.68727e-09	2.37247
3289	achaete-scute complex homolog 2 (Drosophila)	ASCL2	A_32_P171061	7.88078	9.12673e-13	1.29991e-11	2.37094
2024	potassium inwardly-rectifying channel, subfamily J, member 6	KCNJ6	A_23_P29053	9.78081	1.23508e-17	3.05059e-16	2.37081
3556	neuronal pentraxin II	NPTX2	A_23_P82651	7.82091	5.84673e-12	7.5644e-11	2.37051
2600	chromosome 6 open reading frame 26	C6orf26	NM_025259_3_3446	9.32625	3.90685e-15	7.27448e-14	2.36652
3597	interleukin 20	IL20	A_23_P401461	7.44129	8.05949e-12	1.02482e-10	2.36635
406	chromosome 12 open reading frame 70	C12orf70	A_23_P389250	15.5935	5.50212e-34	7.98189e-32	2.36561
505	nuclear factor of activated T-cells, cytoplasmic, calcineurin-dependent 2 interacting protein	NFATC2IP	A_24_P330623	17.8358	7.23344e-32	8.23567e-30	2.36468
632	hyaluronoglucosaminidase 3	HYAL3	A_23_P361406	15.8178	4.90427e-30	4.45607e-28	2.36282
1031	coiled-coil domain containing 87	CCDC87	A_23_P127483	12.7258	1.00272e-24	5.2337e-23	2.36278
1551	chromosome 16 open reading frame 13	C16orf13	A_32_P42213	12.5813	1.7766e-20	5.95718e-19	2.36006
804	chromosome 22 open reading frame 45	C22orf45	A_23_P109435*	13.8935	1.27206e-27	8.85681e-26	2.35891
261	tropomyosin 3	TPM3	A_32_P29784	22.8154	5.12704e-38	1.26889e-35	2.35552
620	La ribonucleoprotein domain family, member 4B	LARP4B	A_23_P35677	16.2928	3.20729e-30	2.9725e-28	2.35297
2179	spermatogenesis and oogenesis specific basic helix-loop-helix 1	SOHLH1	A_24_P307964	9.28533	7.92654e-17	1.78992e-15	2.35238
1945	poly (ADP-ribose) polymerase family, member 14	PARP14	A_32_P56759	10.7543	4.53932e-18	1.17828e-16	2.35132
2522	MARCKS-like 1	MARCKSL1	A_23_P307	10.0149	2.12496e-15	4.08746e-14	2.351
3971	lysosomal-associated membrane protein 3	LAMP3	A_23_P29774	7.05329	8.5772e-11	9.66951e-10	2.35076
633	solute carrier family 2 (facilitated glucose transporter), member 10	SLC2A10	A_24_P271323	13.9128	5.15296e-30	4.6782e-28	2.34925
116	FAD-dependent oxidoreductase domain containing 2	FOXRED2	NM_024955_3_3071	18.1551	2.03433e-44	1.27001e-41	2.34744
1311	histone cluster 1, H4k	HIST1H4K	A_23_P30813	11.9701	3.79982e-22	1.54049e-20	2.34667
1393	PYD (pyrin domain) containing 1	PYDC1	A_23_P407614	11.6615	1.32874e-21	5.08625e-20	2.34602
1432	CCR4 carbon catabolite repression 4-like (S. cerevisiae)	CCRN4L	A_24_P213794	12.1874	2.80342e-21	1.03428e-19	2.33997
333	WD repeat domain 5 pseudogene	LOC401127	A_23_P41267	17.7287	8.34776e-36	1.51821e-33	2.33943
3905	extracellular matrix protein 1	ECM1	A_23_P160563	7.30176	5.57424e-11	6.41693e-10	2.33901
552	histone cluster 1, H3j	HIST1H3J	A_23_P93280	17.9169	4.97741e-31	5.17404e-29	2.33443
2073	SRY (sex determining region Y)-box 4	SOX4	A_23_P82169	10.6037	2.24209e-17	5.35342e-16	2.33376
3366	ectodermal-neural cortex 1 (with BTB-like domain)	ENC1	A_23_P213424	8.21733	1.66058e-12	2.29885e-11	2.33307
109	tudor and KH domain containing	TDRKH	A_24_P41971	20.2086	1.23753e-44	8.13715e-42	2.33267
1637	RAS guanyl releasing protein 1 (calcium and DAG-regulated)	RASGRP1	A_23_P113258	10.7326	6.50026e-20	2.04278e-18	2.33235
1029	ring finger and WD repeat domain 3	RFWD3	A_24_P287826	14.1621	9.10801e-25	4.76736e-23	2.33095
1847	LIM domain kinase 1	LIMK1	A_23_P215460	11.186	1.30819e-18	3.60273e-17	2.33077
3126	tyrosinase-related protein 1	TYRP1	A_23_P94403	8.00468	2.91456e-13	4.40706e-12	2.33003
881	sphingosine-1-phosphate lyase 1	SGPL1	A_23_P75325	15.4684	1.1562e-26	7.30417e-25	2.32937
1394	transmembrane protein 79	TMEM79	A_23_P149256	12.428	1.33787e-21	5.11944e-20	2.32799
1496	N-ethylmaleimide-sensitive factor pseudogene 1	NSFP1	A_24_P221643*	12.4847	7.34312e-21	2.57166e-19	2.32735
1340	coronin, actin binding protein, 2A	CORO2A	A_23_P135055	12.3487	5.77746e-22	2.30276e-20	2.32708
334	chromosome 14 open reading frame 80	C14orf80	A_23_P431379	19.3641	9.64246e-36	1.74796e-33	2.32707
4520	asporin	ASPN	NM_017680_2_2198	6.58541	2.13915e-09	2.06416e-08	2.32641
748	essential meiotic endonuclease 1 homolog 2 (S. pombe)	EME2	A_23_P366130	14.1921	2.23252e-28	1.69341e-26	2.32285
3679	protease, serine, 8	PRSS8	A_24_P150806	7.96094	1.35056e-11	1.67088e-10	2.32095
6531	coagulation factor II (thrombin) receptor-like 2	F2RL2	A_32_P60065	4.5391	1.03489e-05	6.5204e-05	2.32044
1700	cation channel, sperm associated 1	CATSPER1	A_23_P52677	11.8769	1.51815e-19	4.59178e-18	2.31921
1863	syntaxin binding protein 2	STXBP2	A_23_P130614	11.6418	1.54756e-18	4.22012e-17	2.31794
1078	origin recognition complex, subunit 1-like (yeast)	ORC1L	A_23_P45797	13.1588	2.65808e-24	1.32752e-22	2.31771
714	SIN3 homolog B, transcription regulator (yeast)	SIN3B	A_24_P93901	14.5042	6.56251e-29	5.23507e-27	2.31664
1453	cyclin-dependent kinase inhibitor 2A (melanoma, p16, inhibits CDK4)	CDKN2A	A_23_P43490	10.8521	4.07508e-21	1.47551e-19	2.31565
4162	plakophilin 3	PKP3	A_23_P95810	7.30957	2.56148e-10	2.73272e-09	2.31526
209	zinc finger protein 703	ZNF703	A_24_P274928	16.8485	7.17063e-40	2.34359e-37	2.31466
5308	POTE ankyrin domain family, member B	POTEB	A_32_P16007	5.58616	8.42894e-08	6.81001e-07	2.3145
4715	erythrocyte membrane protein band 4.1 like 5	EPB41L5	A_23_P209290	6.49914	5.91953e-09	5.43768e-08	2.31339
1382	shroom family member 2	SHROOM2	A_23_P217753	12.3333	1.11349e-21	4.29633e-20	2.311
3669	melanophilin	MLPH	A_23_P154400	7.45399	1.2921e-11	1.60176e-10	2.31065
1201	SNHG3-RCC1 readthrough transcript	SNHG3-RCC1	A_23_P46309*	13.6102	5.19458e-23	2.30434e-21	2.30972
1202	regulator of chromosome condensation 1	RCC1	A_23_P46309*	13.6102	5.19458e-23	2.30434e-21	2.30972
4025	calmegin	CLGN	A_23_P18684	6.91334	1.16862e-10	1.29744e-09	2.30936
1158	methylenetetrahydrofolate dehydrogenase (NADP+ dependent) 2, methenyltetrahydrofolate cyclohydrolase	MTHFD2	A_23_P120317	13.4849	2.11074e-23	9.73244e-22	2.30913
511	UDP-glucose glycoprotein glucosyltransferase 1	UGGT1	A_23_P255011	17.595	1.00653e-31	1.13093e-29	2.30782
943	lymphocyte-activation gene 3	LAG3	A_23_P116944	12.1649	6.91514e-26	4.04437e-24	2.30692
481	hypothetical LOC440356	LOC440356	A_24_P865226	14.0014	2.26785e-32	2.74222e-30	2.30572
2199	inhibitor of kappa light polypeptide gene enhancer in B-cells, kinase epsilon	IKBKE	A_23_P882	10.3293	9.57823e-17	2.142e-15	2.30518
875	chromosome 9 open reading frame 86	C9orf86	A_23_P392995	12.9682	8.55295e-27	5.48114e-25	2.30473
215	chromosome 17 open reading frame 28	C17orf28	A_24_P350186	18.7381	9.10356e-40	2.90694e-37	2.30272
1168	chromosome 6 open reading frame 141	C6orf141	A_32_P114482	11.6695	2.58162e-23	1.18008e-21	2.30203
381	chromosome 9 open reading frame 116	C9orf116	A_23_P422115	15.4121	1.13548e-34	1.7672e-32	2.30053
2964	sialic acid binding Ig-like lectin 9	SIGLEC9	A_23_P4583	8.99702	7.90272e-14	1.27327e-12	2.29816
1852	24-dehydrocholesterol reductase	DHCR24	A_23_P217820	10.8075	1.426e-18	3.90875e-17	2.29708
1003	synaptonemal complex protein SC65	SC65	A_24_P407866	14.2569	4.20311e-25	2.27392e-23	2.29607
1385	7-dehydrocholesterol reductase	DHCR7	A_23_P24444	11.9524	1.1575e-21	4.45842e-20	2.29567
3044	triggering receptor expressed on myeloid cells 1	TREM1	A_23_P19334	8.85144	1.49948e-13	2.33632e-12	2.29407
2737	kinesin family member 24	KIF24	A_23_P43594	9.36276	1.13757e-14	2.01386e-13	2.29363
938	SKI-like oncogene	SKIL	A_23_P351215	14.4406	5.49551e-26	3.23967e-24	2.29358
985	RAB31, member RAS oncogene family	RAB31	A_23_P141688	12.3738	2.25733e-25	1.25672e-23	2.29208
1040	pyruvate dehydrogenase kinase, isozyme 3	PDK3	NM_005391_1_1265	13.3083	1.1856e-24	6.14496e-23	2.29193
322	downstream neighbor of SON	DONSON	A_23_P425504	17.1076	3.10279e-36	5.91408e-34	2.29153
1060	polymerase (DNA directed), epsilon 2 (p59 subunit)	POLE2	A_23_P163100	13.793	1.62348e-24	8.28693e-23	2.29073
378	selenophosphate synthetase 2	SEPHS2	A_23_P146798*	17.0705	9.54245e-35	1.50196e-32	2.29071
379	hypothetical LOC100131892	LOC100131892	A_23_P146798*	17.0705	9.54245e-35	1.50196e-32	2.29071
810	LAG1 homolog, ceramide synthase 6	LASS6	A_32_P5480	14.0417	1.53513e-27	1.06087e-25	2.28989
491	FAD1 flavin adenine dinucleotide synthetase homolog (S. cerevisiae)	FLAD1	A_23_P34527	18.1833	3.43152e-32	4.03941e-30	2.28801
609	endoplasmic reticulum metallopeptidase 1	ERMP1	A_23_P169153	15.5601	2.31318e-30	2.17653e-28	2.28749
480	solute carrier family 16, member 14 (monocarboxylic acid transporter 14)	SLC16A14	A_23_P131396	14.0895	2.17427e-32	2.63194e-30	2.28611
1904	mitogen-activated protein kinase 13	MAPK13	A_23_P145376	11.4931	2.91619e-18	7.73773e-17	2.28503
344	leucine rich repeat containing 46	LRRC46	A_23_P152950	15.609	1.43196e-35	2.52577e-33	2.28381
1010	chloride channel 2	CLCN2	A_23_P132845	14.2687	4.99952e-25	2.68387e-23	2.28224
347	lamin B2	LMNB2	A_23_P67725	17.9965	1.96408e-35	3.42629e-33	2.2819
346	eukaryotic translation initiation factor 2C, 2	EIF2C2	A_23_P112159	16.5192	1.6914e-35	2.96457e-33	2.27775
2850	non-protein coding RNA 176	NCRNA00176	A_24_P535483	9.0812	3.15225e-14	5.31383e-13	2.27518
1344	VGF nerve growth factor inducible	VGF	A_23_P352905	11.4926	6.10307e-22	2.42471e-20	2.27471
3763	chromosome 3 open reading frame 52	C3orf52	A_23_P58009	7.46135	2.22503e-11	2.68606e-10	2.27435
653	ankyrin repeat domain 5	ANKRD5	A_23_P256047	14.8541	9.93014e-30	8.69557e-28	2.27423
1348	melanoma antigen family A, 4	MAGEA4	A_23_P171175	10.2874	6.72109e-22	2.66168e-20	2.27334
1660	guanylate cyclase 1, soluble, beta 2	GUCY1B2	A_23_P14255	10.5466	8.73292e-20	2.70013e-18	2.27288
1258	transmembrane protease, serine 13	TMPRSS13	A_23_P203150	11.8992	1.56317e-22	6.59968e-21	2.27287
1278	hypothetical LOC340393	C8ORFK29	A_24_P298587	11.9095	2.19341e-22	9.12877e-21	2.27211
3542	kinesin family member 16B	KIF16B	A_23_P28906	7.88011	5.25067e-12	6.8362e-11	2.27151
2030	growth arrest-specific 2 like 3	GAS2L3	A_32_P189204	10.8863	1.33357e-17	3.28144e-16	2.27073
3580	potassium channel, subfamily K, member 1	KCNK1	NM_002245_2_1201	7.35099	7.15236e-12	9.15658e-11	2.27047
2070	testis expressed 19	TEX19	A_23_P375165	10.0804	2.19433e-17	5.24502e-16	2.26985
4214	carbonic anhydrase XII	CA12	A_23_P151956	6.63055	3.41985e-10	3.59496e-09	2.26882
524	mitogen-activated protein kinase-activated protein kinase 2	MAPKAPK2	NM_004759_2_2003	17.3488	1.89276e-31	2.0722e-29	2.2686
3998	pericentrin	PCNT	A_24_P393270	7.39236	9.90337e-11	1.10769e-09	2.26555
1372	crumbs homolog 3 (Drosophila)	CRB3	A_24_P108515	13.6485	9.18866e-22	3.57393e-20	2.26552
976	LSM14B, SCD6 homolog B (S. cerevisiae)	LSM14B	A_23_P323783	13.7754	1.97215e-25	1.10627e-23	2.26276
1866	glycoprotein hormones, alpha polypeptide	CGA	A_23_P42386	9.35649	1.59521e-18	4.34579e-17	2.2623
2505	v-myc myelocytomatosis viral oncogene homolog 1, lung carcinoma derived (avian)	MYCL1	A_24_P156757	9.04189	1.94821e-15	3.76965e-14	2.26178
5474	grainyhead-like 2 (Drosophila)	GRHL2	A_23_P259673	5.68756	1.73694e-07	1.35221e-06	2.26146
4148	melanoma antigen family C, 2	MAGEC2	A_23_P62096	6.62195	2.37265e-10	2.54274e-09	2.26082
2264	E2F transcription factor 5, p130-binding	E2F5	A_23_P31721	10.071	1.90584e-16	4.12992e-15	2.26033
123	ADP-ribosylation factor guanine nucleotide-exchange factor 2 (brefeldin A-inhibited)	ARFGEF2	A_23_P5995	21.0674	4.1677e-44	2.47662e-41	2.25975
1264	OTU domain, ubiquitin aldehyde binding 2	OTUB2	A_24_P124872	12.9548	1.73673e-22	7.29093e-21	2.2595
1411	coiled-coil domain containing 88C	CCDC88C	A_24_P911663	12.2443	1.97245e-21	7.40988e-20	2.2588
603	immunoglobulin heavy constant gamma 1 (G1m marker)	IGHG1	A_23_P384127	13.7457	1.90819e-30	1.817e-28	2.25879
1739	histone cluster 1, H4b	HIST1H4B	A_24_P166404	11.8134	2.75621e-19	8.12193e-18	2.25838
1829	protein phosphatase 4, catalytic subunit	PPP4C	A_23_P100353	11.7079	9.56387e-19	2.66759e-17	2.25749
1998	mucolipin 2	MCOLN2	A_23_P23640	10.2971	9.13669e-18	2.29342e-16	2.25615
2078	arylsulfatase family, member I	ARSI	A_23_P19030	10.2578	2.32264e-17	5.53386e-16	2.25558
1504	sorting nexin 5	SNX5	A_24_P914479	11.2276	8.05361e-21	2.80898e-19	2.25494
1194	BAI1-associated protein 2-like 1	BAIAP2L1	A_23_P168470	12.8072	4.70195e-23	2.09753e-21	2.25438
610	H2A histone family, member Y	H2AFY	A_23_P70045	17.6827	2.31937e-30	2.1805e-28	2.25423
5286	POTE ankyrin domain family, member C	POTEC	A_23_P420348*	5.66572	7.49554e-08	6.08776e-07	2.25397
5287	POTE ankyrin domain family, member D	POTED	A_23_P420348*	5.66572	7.49554e-08	6.08776e-07	2.25397
3153	stimulated by retinoic acid gene 6 homolog (mouse)	STRA6	A_23_P65779	8.68772	3.54526e-13	5.30585e-12	2.25272
1391	Snf2-related CREBBP activator protein	SRCAP	A_24_P941279	12.7007	1.29882e-21	4.97687e-20	2.25242
2003	SFRS protein kinase 3	SRPK3	A_23_P125773	9.5021	9.58917e-18	2.40157e-16	2.25083
890	apolipoprotein O	APOO	A_23_P61128	14.547	1.34255e-26	8.4192e-25	2.25044
631	DNA (cytosine-5-)-methyltransferase 3 beta	DNMT3B	A_23_P28954	13.678	4.80999e-30	4.37398e-28	2.25036
3113	chromosome 22 open reading frame 30	C22orf30	A_24_P404628	8.73118	2.63307e-13	4.00047e-12	2.24981
855	kinesin family member C2	KIFC2	A_23_P358537*	14.376	4.71777e-27	3.09111e-25	2.24937
856	forkhead box H1	FOXH1	A_23_P358537*	14.376	4.71777e-27	3.09111e-25	2.24937
2116	guanylate binding protein 5	GBP5	A_23_P74292	9.88707	3.63026e-17	8.47669e-16	2.248
396	cell division cycle associated 4	CDCA4	A_24_P133488	17.8837	2.58488e-34	3.86595e-32	2.24754
774	aspartate beta-hydroxylase domain containing 2	ASPHD2	A_23_P91640	15.0275	4.96135e-28	3.60104e-26	2.24617
265	threonyl-tRNA synthetase 2, mitochondrial (putative)	TARS2	A_23_P552	19.8816	6.25366e-38	1.52731e-35	2.24466
828	cyclin-dependent kinase 5, regulatory subunit 1 (p35)	CDK5R1	BC030792_1_3002	14.965	2.28861e-27	1.55166e-25	2.24255
3003	membrane-spanning 4-domains, subfamily A, member 8B	MS4A8B	A_23_P139147	8.27579	1.04906e-13	1.66345e-12	2.24227
1982	CD2-associated protein	CD2AP	A_23_P156484	10.9664	7.77228e-18	1.96648e-16	2.24049
4754	SET nuclear oncogene	SET	A_23_P217015	6.42162	7.22794e-09	6.57814e-08	2.24037
6863	microseminoprotein, beta-	MSMB	A_24_P146683	4.19158	3.15481e-05	0.000186444	2.23997
974	secernin 1	SCRN1	A_23_P215355	13.2685	1.74529e-25	9.81983e-24	2.23772
1022	cyclin N-terminal domain containing 2	CNTD2	A_23_P78903	12.3932	7.6845e-25	4.05472e-23	2.23693
2786	potassium channel, subfamily K, member 15	KCNK15	A_23_P109026	9.02082	1.7917e-14	3.10172e-13	2.23618
628	tripartite motif-containing 25	TRIM25	A_23_P15323	16.9009	4.2734e-30	3.90521e-28	2.23535
1356	chromosome 6 open reading frame 150	C6orf150	A_32_P1173	12.1777	7.31442e-22	2.88023e-20	2.23396
1919	G protein-coupled receptor 137C	GPR137C	A_23_P140316	10.5006	3.40935e-18	8.96492e-17	2.23138
1410	family with sequence similarity 110, member A	FAM110A	NM_031424_2_1306	13.0939	1.91669e-21	7.21016e-20	2.23088
1545	protein tyrosine phosphatase, receptor type, f polypeptide (PTPRF), interacting protein (liprin), alpha 3	PPFIA3	A_23_P320553	11.9293	1.63661e-20	5.51609e-19	2.22859
634	chromosome 8 open reading frame 30A	C8orf30A	A_23_P61268*	16.5052	5.54932e-30	5.02573e-28	2.22855
635	chromosome 8 open reading frame 30B	C8orf30B	A_23_P61268*	16.5052	5.54932e-30	5.02573e-28	2.22855
3172	cellular retinoic acid binding protein 2	CRABP2	A_23_P115063	8.26108	3.78816e-13	5.63522e-12	2.22816
933	MYC-associated zinc finger protein (purine-binding transcription factor)	MAZ	A_24_P93974	15.2819	4.77875e-26	2.84125e-24	2.22742
893	chromosome 19 open reading frame 28	C19orf28	A_23_P345139	15.5877	1.48641e-26	9.28991e-25	2.22535
1164	putative homeodomain transcription factor 2	PHTF2	A_24_P323945	13.7607	2.28062e-23	1.0468e-21	2.22279
2455	family with sequence similarity 108, member C1	FAM108C1	A_32_P39095	9.76928	1.32782e-15	2.62174e-14	2.22263
671	GINS complex subunit 4 (Sld5 homolog)	GINS4	A_23_P136787	15.0919	2.00031e-29	1.6968e-27	2.22007
4129	bromodomain adjacent to zinc finger domain, 1B	BAZ1B	A_32_P161327	7.24424	2.13449e-10	2.29769e-09	2.21991
244	hypothetical LOC653602	LOC653602	A_24_P413921*	17.2846	1.45264e-38	3.83426e-36	2.21977
245	family with sequence similarity 84, member A	FAM84A	A_24_P413921*	17.2846	1.45264e-38	3.83426e-36	2.21977
860	ATP-binding cassette, sub-family C (CFTR/MRP), member 5	ABCC5	A_23_P212660	13.6938	5.53234e-27	3.59936e-25	2.21848
1940	heparan sulfate (glucosamine) 3-O-sulfotransferase 3A1	HS3ST3A1	A_23_P66523	10.2708	4.23314e-18	1.10215e-16	2.21706
1039	G protein-coupled receptor 172A	GPR172A	A_23_P258281	14.4068	1.17738e-24	6.1052e-23	2.21646
1506	heat shock 27kDa protein-like 2 pseudogene	HSPBL2	A_32_P76247	11.2221	8.53652e-21	2.97368e-19	2.21637
1578	one cut homeobox 2	ONECUT2	A_23_P66988	10.2629	2.96891e-20	9.73199e-19	2.21636
476	family with sequence similarity 83, member H	FAM83H	A_24_P800604	16.8017	1.99568e-32	2.42632e-30	2.21505
22	chromosome 20 open reading frame 20	C20orf20	A_23_P17307	23.4836	1.32025e-56	5.05896e-53	2.2148
1025	spermatid perinuclear RNA binding protein	STRBP	A_23_P252155	15.0582	8.20999e-25	4.31765e-23	2.21453
752	adrenomedullin 2	ADM2	A_24_P91780	13.5346	2.77358e-28	2.08531e-26	2.21352
6695	hypothetical LOC100128031	LOC100128031	A_23_P19944*	4.46456	1.7089e-05	0.000104512	2.21327
6696	claudin 4	CLDN4	A_23_P19944*	4.46456	1.7089e-05	0.000104512	2.21327
1363	phosphate cytidylyltransferase 1, choline, alpha	PCYT1A	A_24_P17609	13.1516	8.10822e-22	3.17816e-20	2.21197
1584	histone cluster 1, H2ac	HIST1H2AC	A_23_P372859	12.1376	3.19425e-20	1.04092e-18	2.21179
625	proline-rich transmembrane protein 3	PRRT3	A_23_P80623	14.4779	3.96389e-30	3.63431e-28	2.21159
104	DDB1 and CUL4 associated factor 10	DCAF10	A_23_P217059	19.2471	9.36466e-45	6.3453e-42	2.21155
1269	ankyrin repeat domain 50	ANKRD50	A_23_P81017	12.3109	1.96297e-22	8.21276e-21	2.21002
453	heparan-alpha-glucosaminide N-acetyltransferase	HGSNAT	A_23_P147949	16.4166	6.62223e-33	8.4779e-31	2.20989
2124	keratin 8 pseudogene	FLJ46111	A_24_P489690	10.268	3.80979e-17	8.87352e-16	2.20939
2286	pleckstrin homology domain containing, family A member 6	PLEKHA6	A_23_P148753	10.0648	2.51008e-16	5.35884e-15	2.2093
1966	transcription elongation factor A (SII), 3	TCEA3	A_23_P34376	10.6205	5.7552e-18	1.4746e-16	2.20914
3398	SMG1 homolog, phosphatidylinositol 3-kinase-related kinase (C. elegans)	SMG1	A_32_P20120	8.32826	2.02288e-12	2.76833e-11	2.20849
1455	hypothetical protein LOC100128401	LOC100128401	A_24_P245813*	12.0476	4.16274e-21	1.50529e-19	2.20836
680	chromosome 5 open reading frame 13	C5orf13	A_23_P92794	15.5943	2.44601e-29	2.04829e-27	2.20732
882	carbohydrate (chondroitin 4) sulfotransferase 11	CHST11	A_23_P139919	14.1086	1.15731e-26	7.30706e-25	2.20708
2829	corin, serine peptidase	CORIN	A_23_P81131	8.83075	2.55472e-14	4.35412e-13	2.20653
6470	desmoplakin	DSP	NM_004415_1_8872	4.63208	8.08804e-06	5.16177e-05	2.20548
659	solute carrier family 25 (mitochondrial carrier: glutamate), member 22	SLC25A22	A_23_P409386	15.8156	1.19682e-29	1.0374e-27	2.20505
1484	tumor protein p53 inducible protein 11	TP53I11	A_24_P160969	12.4176	6.16748e-21	2.18403e-19	2.20487
1503	epsin 3	EPN3	A_24_P102343	12.3405	7.98667e-21	2.78651e-19	2.20399
764	CD80 molecule	CD80	A_23_P155628	15.0765	3.71217e-28	2.73909e-26	2.20325
1500	solute carrier family 39 (metal ion transporter), member 11	SLC39A11	A_24_P57528	11.6578	7.73232e-21	2.70116e-19	2.20239
1709	chondroitin polymerizing factor	CHPF	A_23_P131288	11.8997	1.74633e-19	5.25617e-18	2.20221
2844	G protein-coupled receptor 143	GPR143	A_23_P45559	8.77862	2.992e-14	5.05674e-13	2.20179
842	small optic lobes homolog (Drosophila)	SOLH	A_24_P928639	13.7696	3.37692e-27	2.25378e-25	2.20082
1636	sterile alpha motif domain containing 1	SAMD1	A_32_P89073	12.333	6.39056e-20	2.00945e-18	2.2003
150	DNA (cytosine-5-)-methyltransferase 3 alpha	DNMT3A	A_23_P154496	20.2303	1.80179e-42	8.66753e-40	2.19694
1421	EF-hand domain family, member D2	EFHD2	A_24_P251053	12.642	2.26487e-21	8.43711e-20	2.19675
2016	collagen, type XXII, alpha 1	COL22A1	A_32_P405759	10.1937	1.15543e-17	2.86469e-16	2.19484
4375	KIAA1543	KIAA1543	A_23_P394041	6.98531	9.14975e-10	9.16981e-09	2.19467
4285	oncostatin M	OSM	A_23_P166409	6.91145	5.57805e-10	5.73404e-09	2.19366
760	nucleus accumbens associated 1, BEN and BTB (POZ) domain containing	NACC1	A_24_P915007	16.6731	3.20647e-28	2.38496e-26	2.19327
4489	potassium voltage-gated channel, Isk-related family, member 4	KCNE4	A_23_P101983	6.44716	1.78199e-09	1.73535e-08	2.1926
1424	thymidine phosphorylase	TYMP	A_23_P91802	12.6354	2.36428e-21	8.78975e-20	2.19201
585	tuftelin 1	TUFT1	A_23_P371825	15.839	1.20683e-30	1.18574e-28	2.19103
1325	neuronal calcium sensor 1	NCS1	A_23_P217049	11.9577	4.44965e-22	1.79022e-20	2.19068
1127	La ribonucleoprotein domain family, member 4	LARP4	A_24_P222365	13.9495	1.24388e-23	5.86191e-22	2.19007
701	chromosome 8 open reading frame 38	C8orf38	A_23_P330478	14.7352	4.49626e-29	3.64966e-27	2.18994
2271	chromosome 8 open reading frame 59	C8orf59	A_23_P31714*	10.0074	2.03549e-16	4.3963e-15	2.18967
2584	chromosome 20 open reading frame 54	C20orf54	A_23_P57108	9.56973	3.42505e-15	6.42149e-14	2.18934
3275	chromobox homolog 1 (HP1 beta homolog Drosophila )	CBX1	A_23_P107508	8.28544	7.92133e-13	1.13477e-11	2.18746
2854	HHIP-like 2	HHIPL2	A_23_P86060	8.25286	3.36117e-14	5.65229e-13	2.18648
2955	pleckstrin homology domain containing, family N member 1	PLEKHN1	A_23_P23617	8.82177	7.19382e-14	1.16479e-12	2.18647
3496	paired box 9	PAX9	A_23_P162931	7.69491	3.97441e-12	5.25334e-11	2.18588
1192	growth factor receptor-bound protein 2	GRB2	A_23_P89246	13.6895	4.47849e-23	2.00267e-21	2.18548
1570	p21 protein (Cdc42/Rac)-activated kinase 4	PAK4	A_23_P67683	12.3936	2.54119e-20	8.3968e-19	2.18406
1444	nudE nuclear distribution gene E homolog 1 (A. nidulans)	NDE1	A_23_P206901	12.7962	3.5024e-21	1.27815e-19	2.18367
1764	chromosome 16 open reading frame 93	C16orf93	A_24_P842005*	11.1438	4.33512e-19	1.25844e-17	2.18287
923	ORM1-like 2 (S. cerevisiae)	ORMDL2	A_24_P124567	14.7257	3.84796e-26	2.31258e-24	2.18236
1338	clathrin, light chain B	CLTB	A_23_P252671	12.2297	5.55022e-22	2.21616e-20	2.18119
79	TEA domain family member 4	TEAD4	A_23_P32755	19.0488	1.7523e-46	1.66428e-43	2.17939
1542	thrombospondin 2	THBS2	A_24_P605620	11.4256	1.57935e-20	5.3328e-19	2.17782
5145	serine peptidase inhibitor, Kunitz type 1	SPINT1	A_23_P49060	6.0658	4.2702e-08	3.56834e-07	2.17577
876	lysophosphatidylcholine acyltransferase 1	LPCAT1	A_24_P406006	14.1482	8.75262e-27	5.60263e-25	2.17462
543	histone cluster 1, H2ag	HIST1H2AG	A_23_P59061	14.9275	3.4854e-31	3.69568e-29	2.17435
1175	pyrimidinergic receptor P2Y, G-protein coupled, 6	P2RY6	A_24_P372751	12.6443	3.57888e-23	1.62192e-21	2.17309
3790	neuropilin (NRP) and tolloid (TLL)-like 2	NETO2	A_32_P77989	7.36997	2.58615e-11	3.09877e-10	2.17275
2809	potassium voltage-gated channel, subfamily G, member 3	KCNG3	A_32_P800799	8.72433	2.14385e-14	3.67811e-13	2.17256
768	protein disulfide isomerase family A, member 4	PDIA4	NM_004911_2_2584	15.6325	4.02215e-28	2.9463e-26	2.17254
6109	NADPH oxidase 4	NOX4	A_23_P47147	4.99584	2.13158e-06	1.46034e-05	2.17245
4494	ubiquitin specific peptidase 43	USP43	A_24_P310009	6.77404	1.85279e-09	1.80066e-08	2.17159
197	cyclin-dependent kinase 5	CDK5	A_24_P329305	21.553	1.46868e-40	5.14839e-38	2.17043
2972	histone cluster 1, H4a	HIST1H4A	A_23_P431179	8.92189	8.15535e-14	1.31112e-12	2.16912
1726	pleckstrin homology domain containing, family A (phosphoinositide binding specific) member 8	PLEKHA8	A_23_P93767	11.5007	2.38445e-19	7.07902e-18	2.16897
2535	progestin and adipoQ receptor family member V	PAQR5	A_23_P163251	8.88029	2.33634e-15	4.47083e-14	2.16897
1309	cAMP responsive element binding protein 3-like 1	CREB3L1	NM_052854_1_2234	11.4261	3.5287e-22	1.43529e-20	2.16848
907	protein tyrosine phosphatase-like A domain containing 1	PTPLAD1	A_23_P99924	14.7444	2.40978e-26	1.47538e-24	2.16797
3526	transmembrane 7 superfamily member 4	TM7SF4	A_23_P43107	7.9067	4.87902e-12	6.37699e-11	2.16597
2953	matrix-remodelling associated 5	MXRA5	A_24_P282355	8.88121	7.0361e-14	1.14042e-12	2.16584
1741	regulator of G-protein signaling 19	RGS19	A_24_P65810	11.8357	2.84823e-19	8.38198e-18	2.16551
703	calcium channel, voltage-dependent, beta 3 subunit	CACNB3	A_23_P204016	15.3903	4.70266e-29	3.81162e-27	2.1654
823	leucine rich repeat containing 59	LRRC59	A_24_P181585*	14.9184	2.07635e-27	1.41552e-25	2.16518
824	essential meiotic endonuclease 1 homolog 1 (S. pombe)	EME1	A_24_P181585*	14.9184	2.07635e-27	1.41552e-25	2.16518
1769	nuclear factor (erythroid-derived 2)-like 3	NFE2L3	A_24_P136653	10.4786	4.66276e-19	1.34757e-17	2.16457
959	inner centromere protein antigens 135/155kDa	INCENP	A_23_P116387	13.3626	1.39274e-25	7.92447e-24	2.1645
2614	N-acetylglucosamine-1-phosphate transferase, alpha and beta subunits	GNPTAB	A_24_P288977	9.56323	4.41905e-15	8.18294e-14	2.16426
5522	chromosome 20 open reading frame 114	C20orf114	A_23_P154780	5.38112	2.08814e-07	1.60994e-06	2.16398
417	centromere protein N	CENPN	A_23_P88740	15.8709	1.01843e-33	1.44535e-31	2.16299
1167	chromosome 18 open reading frame 45	C18orf45	A_23_P89824	13.9648	2.53158e-23	1.15864e-21	2.16237
290	tripartite motif-containing 11	TRIM11	A_24_P370682	20.0906	3.73001e-37	8.0955e-35	2.16213
978	lysosomal protein transmembrane 4 beta	LAPTM4B	A_24_P180680	11.9125	2.06273e-25	1.15358e-23	2.16184
3019	sterol regulatory element binding transcription factor 1	SREBF1	A_24_P390785	8.67137	1.16165e-13	1.83309e-12	2.16165
1526	regulator of G-protein signaling 4	RGS4	A_23_P200730	11.362	1.26945e-20	4.3418e-19	2.16149
1740	potassium channel, subfamily K, member 6	KCNK6	A_23_P50591	10.8841	2.7731e-19	8.16954e-18	2.16139
590	ADP-ribosylation factor-like 8A	ARL8A	A_23_P415040	17.098	1.4286e-30	1.39011e-28	2.1613
295	bolA homolog 2 (E. coli)	BOLA2	A_32_P53483*	18.7016	5.56931e-37	1.18559e-34	2.16056
296	bolA homolog 2B (E. coli)	BOLA2B	A_32_P53483*	18.7016	5.56931e-37	1.18559e-34	2.16056
3021	beta-1,4-N-acetyl-galactosaminyl transferase 3	B4GALNT3	A_32_P49748	8.54189	1.16319e-13	1.835e-12	2.15908
775	glycerol kinase	GK	A_23_P96556	14.6325	5.28419e-28	3.82538e-26	2.15848
1173	Mdm2, transformed 3T3 cell double minute 2, p53 binding protein (mouse) binding protein, 104kDa	MTBP	A_23_P357794	12.6748	3.02063e-23	1.37341e-21	2.15797
2439	absent in melanoma 2	AIM2	A_23_P12100	8.83807	1.09193e-15	2.17648e-14	2.15679
1075	aldehyde dehydrogenase 18 family, member A1	ALDH18A1	A_23_P1361	14.3468	2.46264e-24	1.23324e-22	2.15618
4518	iroquois homeobox 5	IRX5	A_24_P48057	6.71969	2.12787e-09	2.05417e-08	2.15526
224	RAB interacting factor	RABIF	A_24_P345337	20.7835	2.12813e-39	6.4262e-37	2.15297
3506	solute carrier family 30 (zinc transporter), member 8	SLC30A8	A_23_P362798	7.29868	4.17408e-12	5.50156e-11	2.15288
456	family with sequence similarity 173, member A	FAM173A	A_23_P54728	17.2618	8.00283e-33	1.01867e-30	2.15287
4050	phosphatidylinositol-3,4,5-trisphosphate-dependent Rac exchange factor 1	PREX1	A_23_P413642	7.05615	1.40807e-10	1.55119e-09	2.15214
2637	proprotein convertase subtilisin/kexin type 6	PCSK6	A_23_P388186	8.94362	4.88851e-15	8.9938e-14	2.15203
4055	pleckstrin 2	PLEK2	A_23_P151506	7.38315	1.42334e-10	1.56677e-09	2.1517
844	major facilitator superfamily domain containing 3	MFSD3	A_23_P406347	14.5947	3.5555e-27	2.36586e-25	2.15166
1287	arginyl aminopeptidase (aminopeptidase B)	RNPEP	A_23_P97770	13.1352	2.65172e-22	1.09582e-20	2.15079
906	coiled-coil domain containing 151	CCDC151	A_23_P326891	11.8564	2.3635e-26	1.44864e-24	2.15065
3150	WDNM1-like pseudogene	LOC645638	A_24_P691826	8.03666	3.48523e-13	5.22164e-12	2.14993
4983	creatine kinase, mitochondrial 1A	CKMT1A	A_23_P163235*	5.92173	2.16452e-08	1.86832e-07	2.14885
4984	creatine kinase, mitochondrial 1B	CKMT1B	A_23_P163235*	5.92173	2.16452e-08	1.86832e-07	2.14885
1186	solute carrier family 12 (potassium/chloride transporters), member 8	SLC12A8	A_23_P110105	13.2345	4.18133e-23	1.87886e-21	2.14869
237	LSM4 homolog, U6 small nuclear RNA associated (S. cerevisiae)	LSM4	A_23_P153757	21.0314	6.33963e-39	1.77005e-36	2.1464
2529	chromosome 14 open reading frame 53	C14orf53	A_32_P58515	8.52934	2.24767e-15	4.31304e-14	2.14586
6498	ATP-binding cassette, sub-family A (ABC1), member 12	ABCA12	A_23_P56369	4.50962	9.24534e-06	5.86164e-05	2.14539
85	mitochondrial ribosomal protein S34	MRPS34	A_23_P163496	23.5227	7.86459e-46	6.62074e-43	2.14508
4086	zinc finger protein 552	ZNF552	A_23_P38824	7.16099	1.62203e-10	1.77336e-09	2.14508
520	SAC3 domain containing 1	SAC3D1	A_23_P348298	17.5781	1.55733e-31	1.71852e-29	2.14481
101	presenilin enhancer 2 homolog (C. elegans)	PSENEN	A_24_P48587	22.7061	5.51002e-45	3.87525e-42	2.14479
141	sideroflexin 1	SFXN1	A_23_P346337	20.7459	4.52837e-43	2.38486e-40	2.14463
995	abhydrolase domain containing 11	ABHD11	A_23_P8558	14.1674	2.65711e-25	1.46607e-23	2.14461
1499	calcium channel, voltage-dependent, gamma subunit 4	CACNG4	A_24_P70304	11.0603	7.69329e-21	2.68837e-19	2.14351
767	transient receptor potential cation channel, subfamily M, member 2	TRPM2	A_23_P40477	14.0189	3.81406e-28	2.80682e-26	2.14063
1748	nudix (nucleoside diphosphate linked moiety X)-type motif 19	NUDT19	A_23_P39215	11.4372	3.21379e-19	9.4353e-18	2.14057
526	ligase III, DNA, ATP-dependent	LIG3	NM_013975_1_3258	16.9993	2.09763e-31	2.28524e-29	2.14045
716	adenosylhomocysteinase-like 2	AHCYL2	A_23_P252075	15.9743	6.82371e-29	5.43174e-27	2.13918
2157	chromosome 20 open reading frame 85	C20orf85	A_32_P233688	9.04023	5.77958e-17	1.32203e-15	2.13854
4096	HtrA serine peptidase 4	HTRA4	A_23_P44414	7.16496	1.72451e-10	1.87893e-09	2.13854
1900	steroid-5-alpha-reductase, alpha polypeptide 2 (3-oxo-5 alpha-steroid delta 4-dehydrogenase alpha 2)	SRD5A2	A_23_P28183	9.64392	2.53101e-18	6.73984e-17	2.13795
4677	hypothetical protein LOC285878	LOC285878	A_23_P157026	6.06963	4.744e-09	4.40261e-08	2.13748
3337	myocardial infarction associated transcript (non-protein coding)	MIAT	A_24_P595225	8.00824	1.35948e-12	1.90144e-11	2.13728
1253	aldolase A, fructose-bisphosphate	ALDOA	A_23_P88963	13.0462	1.34976e-22	5.73793e-21	2.13726
3029	insulin-like growth factor 1 receptor	IGF1R	A_23_P205986	8.37358	1.22195e-13	1.92197e-12	2.13695
536	choroideremia-like (Rab escort protein 2)	CHML	A_23_P46118	15.1336	3.10572e-31	3.31843e-29	2.13649
3082	hypothetical protein MGC4294	MGC4294	A_23_P102681	8.58984	2.03136e-13	3.1269e-12	2.13495
573	nucleoporin 50kDa	NUP50	A_23_P211627	16.9098	8.12186e-31	8.14554e-29	2.13477
4146	roundabout, axon guidance receptor, homolog 2 (Drosophila)	ROBO2	A_24_P376150	6.64596	2.36401e-10	2.53421e-09	2.13398
1714	aldolase A, fructose-bisphosphate pseudogene 2	ALDOAP2	A_24_P740942	11.5735	2.01302e-19	6.04084e-18	2.13361
1403	kelch-like 35 (Drosophila)	KLHL35	A_24_P192978	11.6604	1.71741e-21	6.50011e-20	2.13331
298	Wolf-Hirschhorn syndrome candidate 1	WHSC1	A_23_P389919	18.5601	6.46913e-37	1.36667e-34	2.1328
2141	lymphoid enhancer-binding factor 1	LEF1	A_23_P213042	10.2101	4.87932e-17	1.12631e-15	2.13268
2289	growth differentiation factor 15	GDF15	NM_004864_1_924	9.22441	2.52289e-16	5.38101e-15	2.13263
302	UDP-Gal:betaGlcNAc beta 1,4- galactosyltransferase, polypeptide 3	B4GALT3	A_23_P103919	19.2815	7.18909e-37	1.49322e-34	2.13235
1232	calcium and integrin binding family member 3	CIB3	A_23_P130585	11.9674	9.17714e-23	3.96806e-21	2.13047
1244	leucine-rich repeats and transmembrane domains 2	LRTM2	A_23_P318615	11.2204	1.11749e-22	4.78529e-21	2.1299
805	family with sequence similarity 199, X-linked	FAM199X	A_23_P45295	15.4985	1.30333e-27	9.06888e-26	2.12978
284	kinetochore associated 1	KNTC1	A_23_P136814	18.4018	1.72868e-37	3.8729e-35	2.12941
772	p21 protein (Cdc42/Rac)-activated kinase 2	PAK2	A_23_P106441	15.4132	4.78595e-28	3.48056e-26	2.12928
278	dehydrogenase E1 and transketolase domain containing 1	DHTKD1	A_24_P722217	17.4937	1.28448e-37	2.94908e-35	2.12901
1827	protein tyrosine phosphatase, receptor type, N polypeptide 2	PTPRN2	A_32_P66805	9.63284	9.35028e-19	2.61129e-17	2.12887
731	dipeptidyl-peptidase 9	DPP9	A_23_P208917	16.2968	1.23296e-28	9.58781e-27	2.12802
267	LAG1 homolog, ceramide synthase 2	LASS2	A_23_P63009	18.5972	6.42992e-38	1.56348e-35	2.127
762	MICAL-like 2	MICALL2	AK074068_1_5126	14.2285	3.44188e-28	2.54981e-26	2.12683
3742	distal-less homeobox 5	DLX5	A_23_P31263	7.25752	1.91829e-11	2.33223e-10	2.12622
1718	endosulfine alpha pseudogene 3	ENSAP3	A_24_P118260	11.3667	2.22411e-19	6.63666e-18	2.12542
4064	BCL2-interacting killer (apoptosis-inducing)	BIK	A_23_P103163	7.28597	1.47914e-10	1.62418e-09	2.12497
2230	ligase I, DNA, ATP-dependent	LIG1	A_23_P39116	10.6796	1.4081e-16	3.09784e-15	2.12485
973	transmembrane protein 191C	TMEM191C	A_24_P787883	14.1347	1.74428e-25	9.81916e-24	2.12388
1648	methylcrotonoyl-CoA carboxylase 2 (beta)	MCCC2	A_23_P18887	11.1641	7.43807e-20	2.31654e-18	2.12377
2142	CD72 molecule	CD72	A_24_P21425	9.9864	4.96165e-17	1.14389e-15	2.12233
924	RAB3D, member RAS oncogene family	RAB3D	A_23_P404678	15.1903	3.85371e-26	2.31479e-24	2.12198
700	transmembrane protein 206	TMEM206	A_23_P717	15.4318	4.3801e-29	3.56057e-27	2.12145
2892	Rho GTPase activating protein 11B	ARHGAP11B	A_24_P485689*	9.26165	4.54774e-14	7.54154e-13	2.12144
745	general transcription factor IIIC, polypeptide 1, alpha 220kDa	GTF3C1	A_23_P152335	16.3606	2.1237e-28	1.61417e-26	2.12
306	acyl-CoA thioesterase 7	ACOT7	A_24_P205584	18.0907	9.49211e-37	1.93895e-34	2.1198
770	SUMO1/sentrin specific peptidase 5	SENP5	A_23_P18103	15.3546	4.64969e-28	3.39479e-26	2.11969
1939	zinc finger and BTB domain containing 41	ZBTB41	A_24_P221660	11.2702	4.18751e-18	1.09104e-16	2.1196
1914	chloride intracellular channel 3	CLIC3	A_23_P254654	10.1381	3.17504e-18	8.38053e-17	2.11773
310	phosphoglycerate mutase family member 5	PGAM5	A_23_P319710	17.8941	1.70327e-36	3.41031e-34	2.11763
1879	ribosomal modification protein rimK-like family member A	RIMKLA	A_23_P349406	9.63089	1.89673e-18	5.12823e-17	2.11724
1668	solute carrier family 1 (glutamate/neutral amino acid transporter), member 4	SLC1A4	A_23_P91151	11.5785	1.01126e-19	3.11201e-18	2.11707
1482	podocalyxin-like 2	PODXL2	A_23_P121033	11.7275	6.11964e-21	2.16916e-19	2.1159
584	DDB1 and CUL4 associated factor 17	DCAF17	A_23_P5483	17.0845	1.20655e-30	1.18651e-28	2.1158
2033	2',5'-oligoadenylate synthetase 1, 40/46kDa	OAS1	NM_016816_1_759	9.97552	1.35602e-17	3.33153e-16	2.11576
2750	ribosome binding protein 1 homolog 180kDa (dog)	RRBP1	A_23_P120566	9.3181	1.2758e-14	2.24463e-13	2.11571
2106	cofilin pseudogene 1	CFLP1	A_23_P395493	10.9433	3.29197e-17	7.72738e-16	2.11436
3042	Wilms tumor upstream neighbor 1	WIT1	A_23_P337689	8.15669	1.45782e-13	2.2746e-12	2.11371
3182	TBC1 domain family, member 24	TBC1D24	A_23_P391637	8.66489	4.02223e-13	5.96825e-12	2.11295
3074	creatine kinase, muscle	CKM	A_23_P50250	8.35999	1.93494e-13	2.9851e-12	2.11249
2406	La ribonucleoprotein domain family, member 1	LARP1	A_24_P7212	10.0724	8.42374e-16	1.69948e-14	2.11117
654	transducin-like enhancer of split 3 (E(sp1) homolog, Drosophila)	TLE3	A_24_P13682	17.0447	1.00435e-29	8.78097e-28	2.11081
1249	zinc finger protein 623	ZNF623	A_23_P258931	13.2688	1.17958e-22	5.03376e-21	2.11066
132	apolipoprotein A-I binding protein	APOA1BP	A_23_P126446	22.0925	8.93525e-44	5.09185e-41	2.11007
118	zinc finger protein 707	ZNF707	A_23_P83714	18.908	2.60933e-44	1.59317e-41	2.10983
2113	nuclear factor of kappa light polypeptide gene enhancer in B-cells inhibitor, epsilon	NFKBIE	A_23_P30655	10.6947	3.55265e-17	8.30068e-16	2.10932
3130	cytochrome P450, family 2, subfamily B, polypeptide 6	CYP2B6	A_23_P38917*	7.71955	2.96641e-13	4.48118e-12	2.10925
3131	cytochrome P450, family 2, subfamily B, polypeptide 7 pseudogene 1	CYP2B7P1	A_23_P38917*	7.71955	2.96641e-13	4.48118e-12	2.10925
3764	chromosome 5 open reading frame 46	C5orf46	A_23_P19176	7.3859	2.22666e-11	2.68745e-10	2.10804
4977	ADAM metallopeptidase with thrombospondin type 1 motif, 4	ADAMTS4	A_23_P360754	6.17266	2.09537e-08	1.81216e-07	2.10728
5154	lysozyme	LYZ	NM_000239_1_1425	5.79598	4.50416e-08	3.7534e-07	2.10697
1205	4-aminobutyrate aminotransferase	ABAT	A_24_P330685	11.1178	5.53453e-23	2.4483e-21	2.10681
5002	myosin VB	MYO5B	A_23_P101193	6.15593	2.33757e-08	2.00957e-07	2.10651
3225	chromodomain helicase DNA binding protein 6	CHD6	A_23_P91212	8.4407	5.48677e-13	8.02139e-12	2.10553
2294	chromosome 1 open reading frame 211	C1orf211	A_23_P343261	9.93581	2.67914e-16	5.70007e-15	2.10539
421	uridine-cytidine kinase 2	UCK2	A_23_P487	17.262	1.30702e-33	1.83153e-31	2.10315
1093	lymphocyte antigen 6 complex, locus H	LY6H	A_23_P134913	12.6253	4.84076e-24	2.37073e-22	2.10266
5003	neuroblastoma breakpoint family, member 4	NBPF4	A_23_P399251	5.83365	2.33808e-08	2.0097e-07	2.10199
648	IQ motif containing D	IQCD	A_24_P390061	14.48	7.848e-30	6.94342e-28	2.10076
523	tetratricopeptide repeat domain 26	TTC26	A_23_P257668	17.1848	1.759e-31	1.92957e-29	2.10065
1523	HEAT repeat containing 3	HEATR3	A_24_P138714	12.1438	1.21912e-20	4.17867e-19	2.1006
3364	histone cluster 1, H4e	HIST1H4E	A_23_P415411	8.21138	1.65374e-12	2.29052e-11	2.09962
3795	cytokine inducible SH2-containing protein	CISH	A_24_P97463	7.56362	2.70514e-11	3.23543e-10	2.09956
2493	transmembrane emp24 protein transport domain containing 9	TMED9	A_23_P70127	9.85854	1.80748e-15	3.51141e-14	2.09945
2288	crystallin, beta A2	CRYBA2	A_23_P165458	9.22127	2.51912e-16	5.37607e-15	2.09929
3208	DPY30 domain containing 2	DYDC2	A_23_P75060	7.87137	4.94481e-13	7.26637e-12	2.09798
3963	discoidin domain receptor tyrosine kinase 1	DDR1	A_23_P93311	7.52866	8.19141e-11	9.25713e-10	2.09794
1156	CCR4-NOT transcription complex, subunit 6	CNOT6	A_23_P18818	13.2254	2.00272e-23	9.24589e-22	2.09679
3482	Cas-Br-M (murine) ecotropic retroviral transforming sequence c	CBLC	A_23_P67121	8.14426	3.6904e-12	4.89541e-11	2.09592
1198	lemur tyrosine kinase 3	LMTK3	A_23_P164918	12.2789	5.05849e-23	2.24846e-21	2.09486
1339	zinc finger, DHHC-type containing 24	ZDHHC24	A_24_P259276	12.8796	5.72038e-22	2.28164e-20	2.09452
2506	transmembrane emp24 protein transport domain containing 3	TMED3	A_23_P26174	9.96394	1.94939e-15	3.77127e-14	2.09439
944	fibronectin type III and SPRY domain containing 1-like	FSD1L	A_23_P94462	13.5425	7.17058e-26	4.18496e-24	2.09435
1007	family with sequence similarity 195, member A	FAM195A	A_24_P253688	14.7936	4.60068e-25	2.47814e-23	2.09319
623	PAS domain containing serine/threonine kinase	PASK	A_23_P408236	15.5319	3.59288e-30	3.30506e-28	2.09299
2808	tumor necrosis factor receptor superfamily, member 4	TNFRSF4	A_32_P26092	9.28327	2.14158e-14	3.67478e-13	2.09212
64	chaperonin containing TCP1, subunit 3 (gamma)	CCT3	A_23_P160629	24.8126	1.90232e-47	2.15706e-44	2.09206
1095	pleckstrin homology domain containing, family B (evectins) member 2	PLEKHB2	A_23_P28642	14.3429	5.12427e-24	2.50517e-22	2.09007
133	DnaJ (Hsp40) homolog, subfamily C, member 1	DNAJC1	A_23_P127128	16.888	1.2126e-43	6.80544e-41	2.08944
1219	transmembrane protein 191A	TMEM191A	A_23_P166338	13.2772	6.56438e-23	2.88094e-21	2.08936
4156	lysophospholipase I	LYPLA1	A_32_P41697	7.20191	2.51299e-10	2.68407e-09	2.08847
2840	family with sequence similarity 110, member C	FAM110C	A_24_P50248	8.88876	2.92847e-14	4.96144e-13	2.08814
1974	inositol polyphosphate-4-phosphatase, type I, 107kDa	INPP4A	A_23_P393531	11.209	6.60828e-18	1.68425e-16	2.0872
5048	heterogeneous nuclear ribonucleoprotein U-like 2	HNRNPUL2	A_24_P917449	6.10394	2.78989e-08	2.376e-07	2.08549
2445	SH3-binding domain kinase 1	SBK1	A_24_P937620	9.75834	1.21871e-15	2.41617e-14	2.08492
1586	KIAA0226	KIAA0226	A_32_P109328	12.3418	3.38928e-20	1.09964e-18	2.08478
587	copine III	CPNE3	A_23_P94370	15.4521	1.25443e-30	1.22816e-28	2.08438
572	similar to hypothetical protein FLJ25976	FLJ25363	A_24_P229756	17.0651	7.66328e-31	7.69952e-29	2.08437
3993	TNF receptor-associated factor 4	TRAF4	A_23_P15653	7.42952	9.39779e-11	1.05369e-09	2.08363
4643	complexin 2	CPLX2	AK094266_1_2456	6.45828	3.91107e-09	3.66419e-08	2.08337
2551	integrin, alpha X (complement component 3 receptor 4 subunit)	ITGAX	A_23_P312132	9.91796	2.78514e-15	5.28326e-14	2.08285
1081	cyclin-dependent kinase inhibitor 2D (p19, inhibits CDK4)	CDKN2D	NM_001800_2_960	13.5213	2.87907e-24	1.43402e-22	2.08208
513	seven in absentia homolog 2 (Drosophila)	SIAH2	NM_005067_2_2176	14.8558	1.03285e-31	1.15699e-29	2.08032
6625	prostate-specific P704P	P704P	A_32_P16325	4.39307	1.40879e-05	8.70926e-05	2.0803
605	NME1-NME2 readthrough	NME1-NME2	NM_000269_1_184*	15.1133	2.15066e-30	2.0374e-28	2.07958
5050	engulfment and cell motility 3	ELMO3	A_23_P140831	6.10377	2.81475e-08	2.3957e-07	2.07888
138	glycyl-tRNA synthetase	GARS	A_24_P154948	20.1196	2.90806e-43	1.55362e-40	2.07885
486	ribophorin II	RPN2	A_23_P120390	17.3198	2.78713e-32	3.33026e-30	2.07514
2728	phosphatidylinositol-4-phosphate 5-kinase, type I, pseudogene 1	PIP5K1P1	A_23_P389427	9.37098	1.02886e-14	1.82869e-13	2.07415
258	chromosome 1 open reading frame 112	C1orf112	A_23_P11863*	18.4859	3.31171e-38	8.34483e-36	2.07412
259	SCY1-like 3 (S. cerevisiae)	SCYL3	A_23_P11863*	18.4859	3.31171e-38	8.34483e-36	2.07412
68	H2A histone family, member V	H2AFV	A_24_P195721	23.0629	2.89159e-47	3.11963e-44	2.07382
1263	hypothetical LOC645895	LOC645895	A_24_P911928*	12.0185	1.7267e-22	7.25156e-21	2.0732
7370	chromosome 1 open reading frame 172	C1orf172	A_23_P393051	3.85954	0.000138188	0.000747462	2.07243
949	Enah/Vasp-like	EVL	A_23_P129038	12.9954	9.31725e-26	5.38409e-24	2.07137
529	agmatine ureohydrolase (agmatinase)	AGMAT	A_23_P103720	15.157	2.47455e-31	2.6775e-29	2.07124
1284	hypothetical LOC643988	LOC643988	A_24_P731549	12.791	2.58387e-22	1.06898e-20	2.07044
1669	cytochrome P450, family 27, subfamily B, polypeptide 1	CYP27B1	A_23_P36397	10.4164	1.03196e-19	3.17218e-18	2.06911
4103	discs, large (Drosophila) homolog-associated protein 4	DLGAP4	A_24_P216253	7.28026	1.78772e-10	1.94456e-09	2.06898
2634	synovial sarcoma translocation gene on chromosome 18-like 1	SS18L1	A_32_P139654	9.53103	4.79675e-15	8.83084e-14	2.06875
1005	3'(2'), 5'-bisphosphate nucleotidase 1	BPNT1	A_24_P122634	14.149	4.26035e-25	2.30264e-23	2.06853
5157	MICAL C-terminal like	MICALCL	A_23_P2042	5.85358	4.60727e-08	3.83587e-07	2.06758
5631	actin, alpha 1, skeletal muscle	ACTA1	A_23_P1102	5.30755	3.31464e-07	2.49599e-06	2.06733
1597	chromosome 1 open reading frame 182	C1orf182	A_23_P394954	11.5101	3.90139e-20	1.25881e-18	2.06633
400	nucleolar and coiled-body phosphoprotein 1	NOLC1	A_23_P314151	17.276	3.31342e-34	4.88974e-32	2.06629
1307	ornithine decarboxylase antizyme 3	OAZ3	A_23_P432583	12.2244	3.45568e-22	1.40764e-20	2.06626
4343	glycine dehydrogenase (decarboxylating)	GLDC	A_23_P123595	6.32599	7.4982e-10	7.58993e-09	2.06615
818	NDRG family member 3	NDRG3	A_23_P154553	16.3212	1.86572e-27	1.27742e-25	2.06614
1481	zinc finger protein 239	ZNF239	A_23_P86731	11.9162	6.09814e-21	2.16292e-19	2.066
3296	sparc/osteonectin, cwcv and kazal-like domains proteoglycan (testican) 1	SPOCK1	A_23_P81598	8.1586	9.59593e-13	1.36394e-11	2.06583
1171	transmembrane protein 54	TMEM54	A_23_P62768	13.594	2.93649e-23	1.33734e-21	2.06555
1066	solute carrier family 19 (folate transporter), member 1	SLC19A1	A_24_P108711	13.6211	2.04828e-24	1.03507e-22	2.0655
588	SET and MYND domain containing 3	SMYD3	A_32_P103291	14.3909	1.29407e-30	1.26474e-28	2.06545
506	centromere protein P	CENPP	A_32_P119180	15.6214	7.26871e-32	8.26736e-30	2.06537
12	nuclear VCP-like	NVL	A_23_P96992	23.6078	3.05401e-60	2.12107e-56	2.0649
357	core-binding factor, runt domain, alpha subunit 2; translocated to, 2	CBFA2T2	A_23_P166167	18.4294	2.70366e-35	4.58684e-33	2.06365
320	nuclear cap binding protein subunit 2, 20kDa	NCBP2	A_23_P155316	17.6165	2.80138e-36	5.38577e-34	2.06333
1727	nipsnap homolog 1 (C. elegans)	NIPSNAP1	A_24_P237278	11.8206	2.42757e-19	7.19931e-18	2.06297
2083	heat shock 27kDa protein 1	HSPB1	A_23_P257709	9.83869	2.47806e-17	5.89277e-16	2.06146
1261	espin	ESPN	A_23_P12405	12.2699	1.70597e-22	7.17263e-21	2.06134
987	lectin, mannose-binding, 1	LMAN1	A_23_P78342	13.1621	2.30785e-25	1.28292e-23	2.06098
2354	Fc receptor-like B	FCRLB	A_23_P350575	8.4823	4.94273e-16	1.02205e-14	2.06094
638	retinoblastoma binding protein 5	RBBP5	A_23_P201882	17.1108	6.10768e-30	5.49558e-28	2.06062
3010	RCAN family member 3	RCAN3	A_23_P391275	8.83355	1.09784e-13	1.73683e-12	2.06009
2159	DENN/MADD domain containing 1B	DENND1B	A_23_P201605	9.92641	5.80404e-17	1.32708e-15	2.05988
3409	transcription factor EC	TFEC	A_23_P254296	7.86097	2.12237e-12	2.89771e-11	2.05905
1051	jumonji domain containing 4	JMJD4	A_23_P115523*	14.022	1.40968e-24	7.24551e-23	2.0587
1052	hypothetical LOC100130093	LOC100130093	A_23_P115523*	14.022	1.40968e-24	7.24551e-23	2.0587
2555	PRP19/PSO4 pre-mRNA processing factor 19 homolog (S. cerevisiae)	PRPF19	A_23_P52978	9.70334	2.84552e-15	5.38951e-14	2.05867
2320	glutamate decarboxylase 1 (brain, 67kDa)	GAD1	A_23_P209570	8.68446	3.57667e-16	7.50756e-15	2.05843
2018	PHD finger protein 6	PHF6	A_23_P171376	10.5717	1.16384e-17	2.88425e-16	2.05828
1358	WD repeat domain 76	WDR76	A_23_P129075	12.3223	7.6457e-22	3.00641e-20	2.05746
487	nudix (nucleoside diphosphate linked moiety X)-type motif 16-like 1	NUDT16L1	A_23_P49426	16.9675	2.81847e-32	3.36409e-30	2.05599
3054	sphingomyelin phosphodiesterase 3, neutral membrane (neutral sphingomyelinase II)	SMPD3	A_23_P152186	8.44933	1.64985e-13	2.56306e-12	2.05583
1103	ATP-binding cassette, sub-family G (WHITE), member 1	ABCG1	A_23_P166297	12.5204	6.33476e-24	3.06593e-22	2.05554
3494	calpain 13	CAPN13	NM_144575_1_1995	8.0742	3.87804e-12	5.13084e-11	2.05497
1943	ADP-ribosylation factor-like 11	ARL11	A_23_P76574	10.4176	4.4652e-18	1.15986e-16	2.05439
2564	hypothetical LOC100129656	LOC100129656	A_24_P171110*	9.46209	3.06527e-15	5.78403e-14	2.05423
2565	heterogeneous nuclear ribonucleoprotein U (scaffold attachment factor A)	HNRNPU	A_24_P171110*	9.46209	3.06527e-15	5.78403e-14	2.05423
1423	chromosome 1 open reading frame 74	C1orf74	A_23_P12147	12.6372	2.29541e-21	8.54228e-20	2.05253
1195	adaptor-related protein complex 3, mu 2 subunit	AP3M2	A_23_P170331	12.714	4.74165e-23	2.11439e-21	2.05211
2425	ATP-binding cassette, sub-family B (MDR/TAP), member 9	ABCB9	A_23_P128094	9.67057	9.84389e-16	1.97203e-14	2.05024
548	tigger transposable element derived 5	TIGD5	A_23_P20437	16.3119	4.24247e-31	4.43914e-29	2.04904
2900	G protein-coupled receptor 115	GPR115	A_24_P337667	8.34362	4.70933e-14	7.79207e-13	2.04831
901	tRNA splicing endonuclease 54 homolog (S. cerevisiae)	TSEN54	A_23_P147278	15.1606	2.03918e-26	1.25749e-24	2.04777
1692	insulin-like growth factor binding protein, acid labile subunit	IGFALS	A_23_P14893	10.2972	1.36224e-19	4.15185e-18	2.04766
3323	spermatogenesis associated 13	SPATA13	A_23_P390115	8.25265	1.21199e-12	1.7046e-11	2.04746
4927	SET translocation pseudogene	LOC389168	A_23_P217016*	6.19967	1.68351e-08	1.47281e-07	2.04629
3677	GATA binding protein 5	GATA5	A_23_P371835	7.19629	1.34603e-11	1.66564e-10	2.04612
2323	CD109 molecule	CD109	A_23_P214176	9.34216	3.76534e-16	7.88721e-15	2.04566
854	vav 2 guanine nucleotide exchange factor	VAV2	A_24_P84419	14.8948	4.52973e-27	2.97141e-25	2.04532
1388	hypothetical protein LOC100133042	LOC100133042	A_23_P13897*	12.6189	1.25995e-21	4.83459e-20	2.04388
1389	glyceraldehyde-3-phosphate dehydrogenase	GAPDH	A_23_P13897*	12.6189	1.25995e-21	4.83459e-20	2.04388
1320	chromosome 9 open reading frame 7	C9orf7	A_23_P123692	12.9415	4.121e-22	1.66341e-20	2.04318
930	synaptogyrin 4	SYNGR4	A_23_P164926	14.3198	4.58834e-26	2.73682e-24	2.04274
3642	inducible T-cell co-stimulator	ICOS	A_23_P371214	7.37923	1.11406e-11	1.39223e-10	2.04231
1087	phosphatidylinositol-4-phosphate 5-kinase, type I, alpha	PIP5K1A	A_32_P40474	13.3984	3.90732e-24	1.92547e-22	2.04204
2184	PHD finger protein 8	PHF8	A_24_P130865	10.3011	8.18403e-17	1.8432e-15	2.04187
867	interferon stimulated exonuclease gene 20kDa-like 2	ISG20L2	A_23_P126457	15.9624	6.80803e-27	4.40355e-25	2.04154
33	integrator complex subunit 7	INTS7	NKI_NM_015434	23.7616	2.06349e-53	4.77712e-50	2.04017
560	armadillo repeat containing 9	ARMC9	A_23_P209731	16.7966	5.27121e-31	5.42866e-29	2.03889
3115	chromosome 2 open reading frame 15	C2orf15	A_23_P415511	8.62827	2.72577e-13	4.13679e-12	2.03832
230	CASK interacting protein 1	CASKIN1	A_24_P53147*	19.356	5.45883e-39	1.55939e-36	2.03818
231	TNF receptor-associated factor 7	TRAF7	A_24_P53147*	19.356	5.45883e-39	1.55939e-36	2.03818
2152	T-cell leukemia/lymphoma 1B	TCL1B	A_23_P48495	9.3848	5.62381e-17	1.28906e-15	2.03748
3511	chromosome 19 open reading frame 33	C19orf33	A_23_P39202*	7.32124	4.30987e-12	5.67111e-11	2.03507
663	glucosamine-phosphate N-acetyltransferase 1	GNPNAT1	A_24_P943040	15.1942	1.45935e-29	1.2542e-27	2.035
3552	interferon-induced protein with tetratricopeptide repeats 2	IFIT2	A_24_P304067	7.66552	5.75422e-12	7.45339e-11	2.03469
741	zinc finger protein 48	ZNF48	A_23_P415643	16.0999	1.67833e-28	1.28621e-26	2.03426
1371	6-phosphofructo-2-kinase/fructose-2,6-biphosphatase 4	PFKFB4	A_24_P362899	12.9689	9.07186e-22	3.53344e-20	2.03364
3670	DIP2 disco-interacting protein 2 homolog B (Drosophila)	DIP2B	A_24_P68162	7.60496	1.2923e-11	1.60184e-10	2.03113
136	stimulated by retinoic acid 13 homolog (mouse)	STRA13	A_23_P253774	18.8626	1.55533e-43	8.4722e-41	2.03105
4058	suppression of tumorigenicity 14 (colon carcinoma)	ST14	NM_021978_2_2655	7.39796	1.44163e-10	1.58518e-09	2.03019
3779	melanoma antigen family A, 2B	MAGEA2B	A_23_P148262*	6.94046	2.48024e-11	2.97958e-10	2.02915
3780	melanoma antigen family A, 2	MAGEA2	A_23_P148262*	6.94046	2.48024e-11	2.97958e-10	2.02915
1652	similar to Actin-related protein 2/3 complex subunit 1B (ARP2/3 complex 41 kDa subunit) (p41-ARC)	LOC653888	A_23_P20194*	11.9542	7.70924e-20	2.39495e-18	2.02901
1653	actin related protein 2/3 complex, subunit 1B, 41kDa	ARPC1B	A_23_P20194*	11.9542	7.70924e-20	2.39495e-18	2.02901
798	cholinergic receptor, nicotinic, alpha 6	CHRNA6	A_23_P157593	14.0757	1.08752e-27	7.62934e-26	2.02883
2619	magnesium transporter 1	MAGT1	A_23_P148266	9.67404	4.47878e-15	8.28111e-14	2.02871
886	ubiquitin family domain containing 1	UBFD1	A_23_P15122	15.0805	1.25717e-26	7.91054e-25	2.02773
2215	nuclear receptor subfamily 2, group F, member 6	NR2F6	A_23_P108328	10.4421	1.12149e-16	2.49247e-15	2.02749
877	transducin (beta)-like 1 X-linked receptor 1	TBL1XR1	A_23_P57988	14.5036	9.04843e-27	5.77867e-25	2.02582
607	similar to histone H3.3B	LOC644950	A_24_P229760	16.6537	2.24102e-30	2.1176e-28	2.02582
2622	insulin-like growth factor binding protein-like 1	IGFBPL1	AK055716_1_1481	9.18096	4.57624e-15	8.4543e-14	2.02426
1008	transporter 1, ATP-binding cassette, sub-family B (MDR/TAP)	TAP1	A_23_P59005	12.1164	4.62907e-25	2.49223e-23	2.02397
3605	cysteine-rich protein 1 (intestinal)	CRIP1	A_23_P33284	7.45268	8.4e-12	1.06532e-10	2.02255
4205	phosphodiesterase 7A	PDE7A	A_23_P123477	7.01655	3.2499e-10	3.42507e-09	2.02229
368	protein tyrosine phosphatase, receptor type, J	PTPRJ	A_23_P405048	16.993	5.12595e-35	8.32764e-33	2.02186
359	DSN1, MIND kinetochore complex component, homolog (S. cerevisiae)	DSN1	A_23_P165938	17.2362	3.23149e-35	5.44079e-33	2.021
551	pogo transposable element with KRAB domain	POGK	A_23_P137715	16.6247	4.7868e-31	4.98522e-29	2.02076
2704	chromosome 20 open reading frame 94	C20orf94	A_23_P364766	9.31225	8.45667e-15	1.51692e-13	2.02031
773	FGFR1 oncogene partner	FGFR1OP	A_23_P145136	14.4584	4.80162e-28	3.48967e-26	2.0196
4923	guanine nucleotide binding protein (G protein), gamma transducing activity polypeptide 1	GNGT1	A_24_P196665	5.8094	1.66857e-08	1.46044e-07	2.01959
3346	vasodilator-stimulated phosphoprotein	VASP	A_23_P119103	8.26738	1.46354e-12	2.03954e-11	2.01925
1351	RAB, member of RAS oncogene family-like 3	RABL3	A_24_P752862	11.2758	6.81649e-22	2.69466e-20	2.01886
5307	wingless-type MMTV integration site family member 2	WNT2	A_23_P59813	5.74043	8.37317e-08	6.7684e-07	2.01859
2576	cytochrome P450, family 21, subfamily A, polypeptide 2	CYP21A2	A_23_P257471	8.98344	3.22486e-15	6.06663e-14	2.01834
986	histone cluster 1, H3a	HIST1H3A	A_23_P111037	14.7368	2.27233e-25	1.26381e-23	2.01637
785	G protein-coupled receptor 19	GPR19	A_23_P99285	13.5874	7.20487e-28	5.12565e-26	2.01632
471	importin 9	IPO9	A_23_P97154	18.4374	1.75472e-32	2.16415e-30	2.01547
307	deoxyribonuclease II, lysosomal	DNASE2	A_23_P119262	19.9997	1.16313e-36	2.3629e-34	2.01462
3725	AE binding protein 1	AEBP1	A_23_P145918	7.49723	1.78349e-11	2.17597e-10	2.01456
234	transmembrane protein 48	TMEM48	A_23_P73982	17.4313	5.77716e-39	1.63352e-36	2.01383
3009	dihydropyrimidinase-like 3	DPYSL3	A_23_P7528	8.52168	1.08713e-13	1.72111e-12	2.01251
2855	tripartite motif-containing 62	TRIM62	A_23_P250481	9.20201	3.40355e-14	5.72096e-13	2.01228
6130	coiled-coil domain containing 64B	CCDC64B	A_24_P273652	4.99759	2.3093e-06	1.57559e-05	2.01174
1971	ephrin-A3	EFNA3	A_23_P149029	10.4022	6.29896e-18	1.60799e-16	2.01146
4399	testis expressed 11	TEX11	A_23_P96503	6.81407	1.05318e-09	1.04991e-08	2.01118
1083	zinc finger protein 668	ZNF668	A_23_P66289	14.7987	3.30978e-24	1.64193e-22	2.01061
1208	DnaJ (Hsp40) homolog, subfamily A, member 4	DNAJA4	A_23_P129279	12.4485	5.57425e-23	2.46293e-21	2.01052
493	solute carrier family 27 (fatty acid transporter), member 4	SLC27A4	A_24_P257963	16.4558	3.68848e-32	4.32814e-30	2.00997
5545	keratin 83	KRT83	A_24_P410412	5.47779	2.31839e-07	1.77845e-06	2.00996
2585	major histocompatibility complex, class II, DQ alpha 2	HLA-DQA2	A_23_P42296	8.88275	3.44049e-15	6.44717e-14	2.00987
1587	EFR3 homolog B (S. cerevisiae)	EFR3B	A_32_P83051	10.1445	3.41713e-20	1.10738e-18	2.00939
3744	protein kinase, cAMP-dependent, regulatory, type II, alpha	PRKAR2A	A_24_P943335	7.72937	1.9443e-11	2.36231e-10	2.00838
916	AF4/FMR2 family, member 4	AFF4	A_24_P942636	14.3747	3.17043e-26	1.92203e-24	2.0082
1867	regulator of G protein signaling 9 binding protein	RGS9BP	A_32_P227605	9.91606	1.60279e-18	4.36429e-17	2.00806
2514	zinc finger and BTB domain containing 32	ZBTB32	A_23_P131025	9.06509	2.04946e-15	3.95453e-14	2.00771
1090	solute carrier family 30 (zinc transporter), member 7	SLC30A7	AI740796_1_374	13.5355	4.502e-24	2.21067e-22	2.00759
613	translocase of inner mitochondrial membrane 17 homolog B (yeast)	TIMM17B	A_23_P33883	16.8334	2.84091e-30	2.65064e-28	2.00757
2261	UDP-N-acetyl-alpha-D-galactosamine:polypeptide N-acetylgalactosaminyltransferase 5 (GalNAc-T5)	GALNT5	A_24_P408736	9.3565	1.87466e-16	4.06792e-15	2.00702
1070	ADP-ribosylation factor 3	ARF3	A_23_P36521	14.621	2.30112e-24	1.15704e-22	2.00689
1210	dehydrogenase/reductase (SDR family) member 13	DHRS13	A_23_P66719	12.5998	5.7497e-23	2.53844e-21	2.0067
30	outer dense fiber of sperm tails 2	ODF2	A_23_P71892	23.3079	8.60553e-54	2.22389e-50	2.00669
3361	phorbol-12-myristate-13-acetate-induced protein 1	PMAIP1	A_23_P366024	7.97096	1.63629e-12	2.26861e-11	2.00608
1705	myotubularin related protein 1	MTMR1	A_24_P290874	11.8874	1.63056e-19	4.91838e-18	2.00579
699	UDP-N-acetyl-alpha-D-galactosamine:polypeptide N-acetylgalactosaminyltransferase 10 (GalNAc-T10)	GALNT10	NM_017540_1_2569	14.6784	4.30291e-29	3.50039e-27	2.00549
1153	mitochondrial ribosomal protein L12	MRPL12	A_23_P10346	13.3608	1.96654e-23	9.09395e-22	2.00541
2017	ST3 beta-galactoside alpha-2,3-sialyltransferase 1	ST3GAL1	A_23_P31894	10.1527	1.16066e-17	2.877e-16	2.00255
1048	purine nucleoside phosphorylase	PNP	A_23_P140256	13.1095	1.28464e-24	6.62119e-23	2.00234
5022	solute carrier family 6 (neurotransmitter transporter, serotonin), member 4	SLC6A4	A_23_P152995	5.63384	2.55206e-08	2.18383e-07	2.0023
467	phosphoglycerate kinase 1	PGK1	NM_000291_2_1796	16.776	1.40131e-32	1.74376e-30	2.00089
1747	pituitary tumor-transforming 1 interacting protein	PTTG1IP	A_24_P391261	11.7499	3.07848e-19	9.04523e-18	1.9991
622	synapse associated protein 1, SAP47 homolog (Drosophila)	SYAP1	A_23_P83939	15.1365	3.52857e-30	3.25129e-28	1.99906
2281	carbohydrate (keratan sulfate Gal-6) sulfotransferase 1	CHST1	A_23_P98205	10.1497	2.41046e-16	5.15905e-15	1.99864
514	amyloid beta (A4) precursor-like protein 1	APLP1	NM_005166_2_2103	13.4887	1.042e-31	1.16606e-29	1.99808
326	sulfiredoxin 1 homolog (S. cerevisiae)	SRXN1	NM_080725_1_2161	17.8011	4.23302e-36	7.94571e-34	1.99784
1428	p21 protein (Cdc42/Rac)-activated kinase 1	PAK1	A_23_P75989	11.3145	2.66394e-21	9.85437e-20	1.99576
3444	gap junction protein, alpha 3, 46kDa	GJA3	A_32_P205238	7.91289	2.67419e-12	3.60767e-11	1.9956
1120	GTPase activating protein (SH3 domain) binding protein 2	G3BP2	A_23_P41254	13.6393	1.04084e-23	4.9449e-22	1.99519
1978	ubiquilin 4	UBQLN4	A_23_P201059	10.739	7.53902e-18	1.91138e-16	1.99424
5318	sphingomyelin phosphodiesterase, acid-like 3B	SMPDL3B	A_23_P160883	5.79912	8.65231e-08	6.98084e-07	1.99396
1464	zinc finger protein 467	ZNF467	A_23_P59474	11.4185	4.64727e-21	1.6691e-19	1.99389
2997	G protein-coupled receptor 26	GPR26	A_23_P415542	7.99303	1.00417e-13	1.59614e-12	1.9938
814	solute carrier family 39 (zinc transporter), member 9	SLC39A9	A_23_P380326	14.5863	1.65599e-27	1.14014e-25	1.99248
243	ATPase, H+ transporting, lysosomal accessory protein 1	ATP6AP1	A_23_P250462	18.5886	1.41487e-38	3.75238e-36	1.99235
175	family with sequence similarity 86, member A	FAM86A	A_23_P66302	19.8256	2.0689e-41	8.42134e-39	1.99234
1697	similar to EGFR-coamplified and overexpressed protein	LOC729086	A_23_P168210*	11.5728	1.48932e-19	4.5107e-18	1.99229
1698	vesicular, overexpressed in cancer, prosurvival protein 1	VOPP1	A_23_P168210*	11.5728	1.48932e-19	4.5107e-18	1.99229
1353	solute carrier family 20 (phosphate transporter), member 1	SLC20A1	A_23_P165657	12.9767	7.13168e-22	2.81325e-20	1.99183
6587	keratinocyte associated protein 3	KRTCAP3	BG546999_1_485	4.50031	1.24793e-05	7.77322e-05	1.99182
726	RAP2C, member of RAS oncogene family	RAP2C	A_23_P147829	13.9318	9.35514e-29	7.3416e-27	1.99168
1429	WD repeat domain 62	WDR62	A_23_P339705	12.5874	2.66517e-21	9.85565e-20	1.99123
1104	polypyrimidine tract binding protein 1	PTBP1	A_23_P208981	14.3577	6.87455e-24	3.31851e-22	1.99109
836	lysocardiolipin acyltransferase 1	LCLAT1	A_23_P108390	15.2932	3.06643e-27	2.05643e-25	1.99106
2731	Rho guanine nucleotide exchange factor (GEF) 16	ARHGEF16	NM_014448_2_1420	9.43503	1.08686e-14	1.92808e-13	1.99098
2432	dual specificity phosphatase 13	DUSP13	A_23_P104471	8.944	1.03141e-15	2.06066e-14	1.99098
2301	islet cell autoantigen 1, 69kDa	ICA1	A_24_P372012	9.89008	2.86452e-16	6.0666e-15	1.99061
5896	chromosome 19 open reading frame 46	C19orf46	A_23_P350074	5.22302	9.37177e-07	6.70326e-06	1.9906
1991	brain abundant, membrane attached signal protein 1	BASP1	NM_006317_2_1148	10.4018	8.78003e-18	2.20938e-16	1.99014
1639	plasminogen activator, urokinase	PLAU	NM_002658_1_1709	10.7935	6.68897e-20	2.09734e-18	1.98988
4497	PRR5-ARHGAP8 readthrough	PRR5-ARHGAP8	A_23_P91783*	6.8002	1.87845e-09	1.82448e-08	1.98828
4498	Rho GTPase activating protein 8	ARHGAP8	A_23_P91783*	6.8002	1.87845e-09	1.82448e-08	1.98828
1602	dipeptidase 1 (renal)	DPEP1	A_23_P152259	11.6494	4.12204e-20	1.32654e-18	1.98584
352	zinc finger, DHHC-type containing 9	ZDHHC9	A_23_P148057	17.8354	2.38454e-35	4.10182e-33	1.98493
1710	trophinin associated protein (tastin)	TROAP	NM_005480_1_2351	11.9543	1.75032e-19	5.26675e-18	1.98474
2168	malectin	MLEC	A_23_P2554	10.3146	6.54062e-17	1.48754e-15	1.98453
472	torsin family 3, member A	TOR3A	A_23_P115313	17.7843	1.76947e-32	2.17992e-30	1.98407
2428	tripartite motif-containing 14	TRIM14	A_23_P334083	9.93538	9.91294e-16	1.98407e-14	1.98348
1617	OTU domain containing 7B	OTUD7B	A_23_P138157	11.9997	5.2842e-20	1.67866e-18	1.98322
1665	transmembrane protein 8A	TMEM8A	A_23_P140907	11.7636	9.6459e-20	2.97497e-18	1.98176
765	septin 9	2009-09-01	A_24_P147910	15.2591	3.73885e-28	2.75512e-26	1.98134
4742	hypothetical LOC285150	FLJ33534	A_24_P374496	6.06435	6.71869e-09	6.13728e-08	1.98119
3248	beta-1,3-N-acetylgalactosaminyltransferase 1 (globoside blood group)	B3GALNT1	A_24_P88870	8.45316	6.68521e-13	9.67167e-12	1.98074
3145	zona pellucida glycoprotein 3 (sperm receptor)	ZP3	A_23_P134419	8.37487	3.36275e-13	5.04766e-12	1.98067
43	asparagine-linked glycosylation 1-like	ALG1L	A_24_P583350	20.6403	9.75935e-52	1.83811e-48	1.98024
3646	seizure related 6 homolog (mouse)-like 2	SEZ6L2	A_24_P116587	7.58761	1.147e-11	1.43148e-10	1.98
1285	stromal cell-derived factor 2-like 1	SDF2L1	A_23_P6344	12.8523	2.58566e-22	1.06932e-20	1.97957
4047	melanoregulin	MREG	A_24_P351283	7.29016	1.38672e-10	1.52904e-09	1.97947
1473	RMI1, RecQ mediated genome instability 1, homolog (S. cerevisiae)	RMI1	A_23_P112341	12.3929	5.40878e-21	1.92764e-19	1.97944
2906	KIT ligand	KITLG	A_23_P204650	8.06089	5.0905e-14	8.39649e-13	1.97788
4067	transglutaminase 2 (C polypeptide, protein-glutamine-gamma-glutamyltransferase)	TGM2	A_24_P923251	7.19839	1.49892e-10	1.64492e-09	1.97787
2246	structural maintenance of chromosomes 1B	SMC1B	A_23_P329861	9.03656	1.58132e-16	3.4577e-15	1.97778
2028	chromosome 9 open reading frame 98	C9orf98	A_23_P83200	10.1754	1.31575e-17	3.24119e-16	1.97778
4431	huntingtin interacting protein 1	HIP1	A_23_P71033	6.82946	1.30062e-09	1.28425e-08	1.97719
1930	heterogeneous nuclear ribonucleoprotein A/B	HNRNPAB	A_23_P19082	10.9789	3.93714e-18	1.02919e-16	1.97574
124	family with sequence similarity 158, member A	FAM158A	A_23_P88238	20.5639	4.68206e-44	2.76747e-41	1.97521
1612	N-acetyltransferase 14 (GCN5-related, putative)	NAT14	A_23_P50389	11.9878	4.99122e-20	1.59105e-18	1.97509
4458	G protein-coupled receptor 158	GPR158	A_24_P349117	6.27058	1.53024e-09	1.49978e-08	1.97454
1575	heat shock transcription factor 2 binding protein	HSF2BP	A_23_P143510	11.5806	2.88004e-20	9.46021e-19	1.97436
1924	chromosome 3 open reading frame 21	C3orf21	A_23_P345708	11.1696	3.59713e-18	9.43413e-17	1.97436
2889	proline rich Gla (G-carboxyglutamic acid) 4 (transmembrane)	PRRG4	A_23_P127663	9.09585	4.50928e-14	7.48112e-13	1.9739
1737	transferrin receptor (p90, CD71)	TFRC	NKI_NM_003234	10.5928	2.7418e-19	8.08378e-18	1.97357
2739	heat shock protein 90kDa alpha (cytosolic), class B member 2 (pseudogene)	HSP90AB2P	A_24_P684800	9.20597	1.16011e-14	2.05245e-13	1.97354
563	guanine monphosphate synthetase	GMPS	A_23_P21033	15.6199	5.44949e-31	5.59154e-29	1.97349
898	hypothetical protein LOC729991	LOC729991	A_24_P393473	13.3706	1.7936e-26	1.11098e-24	1.97329
211	forkhead box K2	FOXK2	A_23_P397966	19.4444	7.55099e-40	2.45348e-37	1.97297
1632	ubiquitin-conjugating enzyme E2Z	UBE2Z	A_24_P378506	11.7681	5.91411e-20	1.86544e-18	1.97248
3100	hypothetical LOC285548	LOC285548	A_24_P892494	8.25076	2.40177e-13	3.66559e-12	1.97247
1126	coiled-coil domain containing 21	CCDC21	A_23_P200873	13.3908	1.23385e-23	5.81709e-22	1.97197
198	kinesin family member 22	KIF22	A_23_P54617	20.1798	1.57092e-40	5.47227e-38	1.97142
2993	Z-DNA binding protein 1	ZBP1	A_23_P259141	8.23403	9.73136e-14	1.54925e-12	1.97018
393	breast cancer 1, early onset	BRCA1	A_23_P207400	14.779	2.20034e-34	3.32212e-32	1.9695
2308	KIAA1549	KIAA1549	A_23_P70829	9.79895	3.0689e-16	6.48461e-15	1.96887
166	small nuclear ribonucleoprotein 25kDa (U11/U12)	SNRNP25	A_23_P152282	19.7565	8.35096e-42	3.62494e-39	1.96851
2300	family with sequence similarity 19 (chemokine (C-C motif)-like), member A5	FAM19A5	A_23_P304489	9.10917	2.86073e-16	6.05971e-15	1.96824
539	leucine rich repeat containing 68	LRRC68	A_23_P101303	17.3694	3.24295e-31	3.45509e-29	1.968
503	nemo-like kinase	NLK	A_23_P15647	15.4757	6.34801e-32	7.26478e-30	1.96754
1842	zinc finger protein 91 homolog (mouse)	ZFP91	A_24_P325287	11.2282	1.27046e-18	3.5049e-17	1.96725
2420	alpha- and gamma-adaptin binding protein	AAGAB	A_23_P37545	10.1395	9.29082e-16	1.86493e-14	1.96601
975	centrosomal protein 97kDa	CEP97	A_23_P143952	13.9729	1.88582e-25	1.05998e-23	1.96598
2238	zinc finger protein 710	ZNF710	A_23_P54421	10.397	1.47923e-16	3.24597e-15	1.96581
3592	chromosome 15 open reading frame 2 pseudogene	LOC392364	A_24_P924915	7.74576	7.90966e-12	1.00693e-10	1.96563
2511	ubiquitin protein ligase E3C	UBE3C	A_24_P265135	9.81406	2.02575e-15	3.91219e-14	1.96544
1813	kelch domain containing 9	KLHDC9	BC022077_1_769	9.93716	7.9001e-19	2.22869e-17	1.9637
3654	ethanolamine kinase 2	ETNK2	A_23_P46025	7.64693	1.19983e-11	1.49321e-10	1.96365
229	dCTP pyrophosphatase 1	DCTPP1	A_23_P33614	17.9752	4.08325e-39	1.19406e-36	1.96304
2015	pantothenate kinase 3	PANK3	A_24_P380329	10.6282	1.11968e-17	2.78163e-16	1.96273
1485	Ras association (RalGDS/AF-6) domain family (N-terminal) member 7	RASSF7	A_23_P47117	12.4607	6.39068e-21	2.25732e-19	1.96257
1240	midnolin	MIDN	A_24_P912204	12.8994	1.03751e-22	4.46347e-21	1.96242
367	MORN repeat containing 3	MORN3	A_23_P98941	16.7456	5.00525e-35	8.16738e-33	1.96181
5247	similar to acetyl-Coenzyme A acyltransferase 2 (mitochondrial 3-oxoacyl-Coenzyme A thiolase)	LOC392335	A_32_P223173	5.88701	6.49484e-08	5.31189e-07	1.96146
970	chromosome 16 open reading frame 88	C16orf88	A_23_P66157	14.6293	1.62127e-25	9.15449e-24	1.96134
2880	PR domain containing 12	PRDM12	A_23_P43317	8.71158	4.10468e-14	6.84153e-13	1.96101
779	chromosome 6 open reading frame 167	C6orf167	A_24_P83678	13.4048	6.27763e-28	4.50348e-26	1.96032
841	CUGBP, Elav-like family member 1	CELF1	A_23_P318390	14.6016	3.29776e-27	2.20226e-25	1.96027
2691	solute carrier family 25 (mitochondrial carrier; dicarboxylate transporter), member 10	SLC25A10	A_23_P146830	9.48127	8.09481e-15	1.45624e-13	1.96005
1441	spindle and kinetochore associated complex subunit 2	SKA2	A_32_P164523	11.8708	3.26039e-21	1.19493e-19	1.95823
410	chromosome 16 open reading frame 53	C16orf53	A_23_P77418	17.0975	7.3292e-34	1.05361e-31	1.95783
6737	ladinin 1	LAD1	A_23_P415510	4.35288	2.01089e-05	0.000121987	1.95768
5139	B-box and SPRY domain containing	BSPRY	A_24_P180849	5.98414	4.19248e-08	3.50576e-07	1.95594
1858	apolipoprotein B48 receptor	APOB48R	A_23_P54767	10.9627	1.49602e-18	4.09061e-17	1.95586
1560	tetratricopeptide repeat domain 39B	TTC39B	A_23_P390094	10.6318	2.12362e-20	7.07597e-19	1.9554
2429	ankyrin repeat domain 58	ANKRD58	A_32_P123256	9.83885	9.96448e-16	1.99403e-14	1.95521
2093	CXXC finger 5	CXXC5	A_23_P399001	9.56334	2.807e-17	6.63524e-16	1.95498
4172	chromosome 12 open reading frame 42	C12orf42	A_24_P15632	7.15753	2.69911e-10	2.87182e-09	1.95444
984	deltex 3-like (Drosophila)	DTX3L	A_23_P347040	13.6202	2.21902e-25	1.23663e-23	1.95444
1789	ras homolog gene family, member D	RHOD	A_23_P1521	10.9484	6.49742e-19	1.85131e-17	1.95429
719	RAB10, member RAS oncogene family	RAB10	A_24_P319675	16.6129	7.9692e-29	6.29397e-27	1.95257
650	transmembrane protein 9	TMEM9	A_23_P114952	15.9086	9.29443e-30	8.19703e-28	1.95181
343	catechol-O-methyltransferase domain containing 1	COMTD1	A_23_P115863	16.0995	1.3264e-35	2.35453e-33	1.95179
1862	protein tyrosine phosphatase, non-receptor type 7	PTPN7	A_23_P201778	10.476	1.53122e-18	4.17966e-17	1.95167
1177	RNA binding motif protein 27	RBM27	A_23_P92779	13.7617	3.59401e-23	1.62745e-21	1.95158
3057	KIAA1598	KIAA1598	A_23_P202587	8.86219	1.69086e-13	2.6242e-12	1.95147
1986	sideroflexin 2	SFXN2	A_24_P175606	10.1657	8.33789e-18	2.10527e-16	1.95139
2367	zinc finger protein 696	ZNF696	A_23_P60101	10.0795	5.80618e-16	1.19107e-14	1.95078
2561	potassium voltage-gated channel, subfamily H (eag-related), member 2	KCNH2	A_23_P168403	8.61377	2.98535e-15	5.64089e-14	1.95058
769	chromosome 21 open reading frame 58	C21orf58	A_23_P132138	13.5658	4.18612e-28	3.06439e-26	1.95054
2568	sema domain, immunoglobulin domain (Ig), short basic domain, secreted, (semaphorin) 3F	SEMA3F	A_24_P300076	9.63319	3.09001e-15	5.82478e-14	1.95014
808	non-SMC condensin I complex, subunit D2	NCAPD2	A_24_P638455	14.6938	1.46815e-27	1.01648e-25	1.94937
1970	F-box protein 45	FBXO45	A_32_P181675	10.7617	6.29503e-18	1.60736e-16	1.94907
2400	cyclin D1	CCND1	A_24_P124550	8.89526	8.24648e-16	1.66826e-14	1.94886
1620	zinc finger protein 469	ZNF469	A_23_P335080	10.4923	5.39181e-20	1.7104e-18	1.94811
3071	KDEL (Lys-Asp-Glu-Leu) endoplasmic reticulum protein retention receptor 3	KDELR3	A_23_P211504	8.35039	1.90509e-13	2.9415e-12	1.94792
5918	solute carrier family 39 (zinc transporter), member 6	SLC39A6	NM_012319_2_2684	5.02501	1.04568e-06	7.43579e-06	1.94732
5530	pancreatic lipase-related protein 2	PNLIPRP2	A_23_P24083	5.30377	2.18941e-07	1.68416e-06	1.94726
861	lysine (K)-specific demethylase 5B	KDM5B	A_32_P70724	14.6866	5.66173e-27	3.68138e-25	1.94678
604	peptidylprolyl isomerase (cyclophilin)-like 5	PPIL5	A_24_P13533	15.7637	2.09567e-30	1.9887e-28	1.94492
2959	lysophosphatidic acid receptor 2	LPAR2	A_23_P101829	9.08319	7.56784e-14	1.22215e-12	1.94472
3908	actinin, alpha 2	ACTN2	A_23_P115012	6.82813	5.76276e-11	6.62366e-10	1.94421
2602	ring finger protein 19B	RNF19B	A_23_P321388	9.66002	3.91143e-15	7.28056e-14	1.94398
2819	CGRP receptor component	CRCP	A_23_P134575	9.25275	2.29742e-14	3.93066e-13	1.94341
4463	histone cluster 1, H4d	HIST1H4D	A_23_P395374	6.69674	1.55858e-09	1.52594e-08	1.94275
3600	ring finger protein 152	RNF152	A_32_P4199	7.69451	8.0992e-12	1.02917e-10	1.94179
350	polycomb group ring finger 3	PCGF3	A_23_P21348	18.2161	2.19041e-35	3.79135e-33	1.94141
2494	TIMP metallopeptidase inhibitor 1	TIMP1	A_23_P62115	9.57253	1.81739e-15	3.52881e-14	1.94114
3365	membrane associated guanylate kinase, WW and PDZ domain containing 3	MAGI3	A_23_P85980	8.09409	1.65415e-12	2.29081e-11	1.94049
1058	NmrA-like family domain containing 1	NMRAL1	A_23_P26645	14.6316	1.59405e-24	8.14415e-23	1.93983
1280	kelch domain containing 10	KLHDC10	A_24_P342127	13.1307	2.29599e-22	9.54497e-21	1.93889
5531	SH3 domain containing 20	SH3D20	A_23_P401626	5.58203	2.20114e-07	1.69271e-06	1.93884
691	outer dense fiber of sperm tails 3	ODF3	A_23_P53094	14.3515	3.62745e-29	2.98587e-27	1.93877
3688	suppressor of defective silencing 3 homolog (S. cerevisiae)	SUDS3	A_32_P13086	7.65438	1.49773e-11	1.84474e-10	1.93871
1756	YdjC homolog (bacterial)	YDJC	A_24_P92367	11.8391	3.6656e-19	1.07108e-17	1.9385
1960	Src homology 2 domain containing adaptor protein B	SHB	A_23_P257746	11.0043	5.36985e-18	1.38e-16	1.93843
2375	myosin ID	MYO1D	A_24_P119609	9.80231	6.37833e-16	1.30434e-14	1.93809
2825	synaptogyrin 2	SYNGR2	A_24_P347854	8.97571	2.45737e-14	4.19269e-13	1.93796
5373	coagulation factor V (proaccelerin, labile factor)	F5	A_23_P148766	5.64294	1.08749e-07	8.67702e-07	1.93731
4955	CSAG family, member 2	CSAG2	A_23_P45214*	5.78906	1.88228e-08	1.63653e-07	1.93664
4956	CSAG family, member 3	CSAG3	A_23_P45214*	5.78906	1.88228e-08	1.63653e-07	1.93664
1242	solute carrier family 37 (glycerol-3-phosphate transporter), member 1	SLC37A1	A_23_P17695	13.5347	1.06035e-22	4.55467e-21	1.93559
5069	chromosome 1 open reading frame 86	C1orf86	A_23_P51187*	6.12741	3.04424e-08	2.58095e-07	1.93555
5070	protein kinase C, zeta	PRKCZ	A_23_P51187*	6.12741	3.04424e-08	2.58095e-07	1.93555
766	chromobox homolog 8 (Pc class homolog, Drosophila)	CBX8	A_23_P55421	14.9297	3.75747e-28	2.76701e-26	1.93502
270	RCD1 required for cell differentiation1 homolog (S. pombe)	RQCD1	A_23_P5461	17.7507	7.10934e-38	1.71369e-35	1.935
463	chromosome 6 open reading frame 125	C6orf125	A_23_P156735	17.1943	1.13531e-32	1.42392e-30	1.93487
1915	phosphatidic acid phosphatase type 2 domain containing 1B	PPAPDC1B	A_23_P329971	10.1385	3.18458e-18	8.40171e-17	1.93469
826	inositol 1,3,4,5,6-pentakisphosphate 2-kinase	IPPK	A_32_P93996*	13.1055	2.22211e-27	1.51119e-25	1.93434
827	similar to hCG1985411	LOC100128361	A_32_P93996*	13.1055	2.22211e-27	1.51119e-25	1.93434
3314	orosomucoid 1	ORM1	A_23_P169486	7.78445	1.12304e-12	1.5839e-11	1.93416
321	polymerase (DNA directed), alpha 2 (70kD subunit)	POLA2	A_23_P161607	18.1094	2.93591e-36	5.61528e-34	1.93404
1817	exosome component 4	EXOSC4	A_23_P32463	11.2502	8.09728e-19	2.28027e-17	1.93343
283	mitochondrial ribosomal protein S12	MRPS12	A_23_P50805	19.3282	1.7069e-37	3.83959e-35	1.93248
3325	chromosome 20 open reading frame 96	C20orf96	A_23_P328035	8.17208	1.22125e-12	1.71653e-11	1.93222
1495	DNA (cytosine-5-)-methyltransferase 1	DNMT1	A_23_P27490	12.2822	7.13209e-21	2.50091e-19	1.9316
862	Fanconi anemia, complementation group D2	FANCD2	A_23_P143994	14.8041	5.72413e-27	3.71978e-25	1.93146
3562	LY6/PLAUR domain containing 5	LYPD5	A_23_P78930	7.93983	6.09927e-12	7.87371e-11	1.93145
1193	histone deacetylase 11	HDAC11	A_23_P155360	12.2878	4.63622e-23	2.06904e-21	1.93127
1638	brain-specific angiogenesis inhibitor 2	BAI2	A_23_P149021	10.413	6.66081e-20	2.08969e-18	1.93085
1000	GA binding protein transcription factor, beta subunit 1	GABPB1	A_23_P205789	13.5105	3.74387e-25	2.03737e-23	1.9307
1899	TBC1 domain family, member 20	TBC1D20	A_23_P354188	11.1482	2.52402e-18	6.72285e-17	1.93059
2473	microtubule-associated protein 7	MAP7	A_23_P122736	9.74438	1.52678e-15	2.99171e-14	1.93038
4448	claudin 3	CLDN3	A_24_P35109	6.73599	1.45285e-09	1.42683e-08	1.92982
2528	ORAI calcium release-activated calcium modulator 2	ORAI2	A_24_P329353	9.70921	2.23008e-15	4.28076e-14	1.92967
887	phosphoinositide-3-kinase, regulatory subunit 2 (beta)	PIK3R2	A_23_P142359	14.8463	1.26297e-26	7.94257e-25	1.92936
4352	MYST histone acetyltransferase (monocytic leukemia) 3	MYST3	A_24_P932203	6.85961	8.21194e-10	8.27621e-09	1.9292
1365	chromosome 9 open reading frame 142	C9orf142	A_23_P312646	13.2138	8.25492e-22	3.23339e-20	1.92908
4051	Fc fragment of IgG, low affinity IIIa, receptor (CD16a)	FCGR3A	A_23_P126298*	7.24048	1.41632e-10	1.55967e-09	1.92903
4052	Fc fragment of IgG, low affinity IIIb, receptor (CD16b)	FCGR3B	A_23_P126298*	7.24048	1.41632e-10	1.55967e-09	1.92903
4591	tumor necrosis factor receptor superfamily, member 12A	TNFRSF12A	A_23_P49335	6.5491	2.87279e-09	2.73059e-08	1.92865
5783	phosphatidic acid phosphatase type 2C	PPAP2C	A_23_P108294	5.32676	6.44122e-07	4.69972e-06	1.92865
782	RAD9 homolog A (S. pombe)	RAD9A	A_23_P323221*	15.4697	6.83283e-28	4.87659e-26	1.9286
783	protein phosphatase 1, catalytic subunit, alpha isozyme	PPP1CA	A_23_P323221*	15.4697	6.83283e-28	4.87659e-26	1.9286
2838	Fanconi anemia, complementation group B	FANCB	A_23_P356021	9.10616	2.82517e-14	4.79373e-13	1.92771
873	poly (ADP-ribose) polymerase family, member 12	PARP12	A_23_P111804	14.0399	8.05061e-27	5.16517e-25	1.92718
1724	M-phase phosphoprotein 9	MPHOSPH9	A_24_P398500	11.7654	2.3805e-19	7.07106e-18	1.92638
3755	formin binding protein 1-like	FNBP1L	A_24_P366960	7.64002	2.09703e-11	2.53871e-10	1.92594
1165	pannexin 1	PANX1	A_23_P47158	12.7589	2.45051e-23	1.12292e-21	1.9256
3890	melanocortin 1 receptor (alpha melanocyte stimulating hormone receptor)	MC1R	A_23_P329271	7.48351	5.03873e-11	5.83432e-10	1.92543
1112	spire homolog 2 (Drosophila)	SPIRE2	A_23_P37824	13.1207	8.9096e-24	4.26567e-22	1.92467
706	zinc finger, DHHC-type containing 21	ZDHHC21	A_24_P102097	14.8832	5.108e-29	4.12512e-27	1.92409
1130	coiled-coil domain containing 123	CCDC123	A_23_P130855	13.6509	1.3027e-23	6.12612e-22	1.92405
1461	myosin XIX	MYO19	A_23_P320250	11.9142	4.55338e-21	1.63855e-19	1.92344
1462	frizzled homolog 2 (Drosophila)	FZD2	A_23_P141362	11.9345	4.57765e-21	1.64569e-19	1.92275
3016	CUGBP, Elav-like family member 3	CELF3	A_23_P337855	8.00926	1.129e-13	1.78308e-12	1.92235
5846	lipid phosphate phosphatase-related protein type 3	LPPR3	A_23_P67569	5.07453	8.03232e-07	5.79783e-06	1.9223
3045	poly(A) polymerase alpha	PAPOLA	A_23_P376237	8.86599	1.51934e-13	2.36627e-12	1.92194
2248	ubiquitin specific peptidase 5 (isopeptidase T)	USP5	A_23_P64956	10.3688	1.60313e-16	3.50334e-15	1.92143
1839	chromosome 20 open reading frame 151	C20orf151	A_32_P331052	11.4643	1.19153e-18	3.2978e-17	1.92117
1525	RAB2A, member RAS oncogene family	RAB2A	A_23_P340254	12.0602	1.25255e-20	4.28665e-19	1.9211
3478	potassium voltage-gated channel, subfamily F, member 1	KCNF1	A_23_P142765	7.66699	3.55831e-12	4.72639e-11	1.9203
498	non-SMC condensin II complex, subunit G2	NCAPG2	NM_017760_2_3121	15.1146	4.67746e-32	5.43128e-30	1.92002
5302	ATPase, H+ transporting, lysosomal 38kDa, V0 subunit d2	ATP6V0D2	A_32_P121424	5.75942	8.18236e-08	6.61994e-07	1.92
1234	adaptor-related protein complex 2, beta 1 subunit	AP2B1	A_23_P55151	12.6795	9.41916e-23	4.06954e-21	1.91901
658	phosphoribosylaminoimidazole carboxylase, phosphoribosylaminoimidazole succinocarboxamide synthetase	PAICS	A_23_P41280	15.8672	1.11975e-29	9.71349e-28	1.91889
720	histone cluster 1, H3i	HIST1H3I	A_23_P59085	15.8372	8.18451e-29	6.45484e-27	1.9187
377	RuvB-like 1 (E. coli)	RUVBL1	A_23_P33053	18.6867	8.81738e-35	1.39376e-32	1.918
2380	family with sequence similarity 178, member A	FAM178A	A_32_P143516	9.72937	6.60955e-16	1.34964e-14	1.91743
1124	carcinoembryonic antigen-related cell adhesion molecule 20	CEACAM20	A_24_P118376	12.8075	1.19854e-23	5.66746e-22	1.9174
3315	BCL2 binding component 3	BBC3	AF332558_1_1519	8.44455	1.14119e-12	1.60889e-11	1.91737
2387	metastasis suppressor 1	MTSS1	A_23_P216262	9.502	6.84571e-16	1.3953e-14	1.91645
6780	endoplasmic reticulum protein 27	ERP27	A_23_P139685	4.30105	2.35127e-05	0.000141431	1.91631
2591	ADAM metallopeptidase with thrombospondin type 1 motif, 6	ADAMTS6	A_23_P213317	9.42356	3.6159e-15	6.7531e-14	1.91563
1753	DDB1 and CUL4 associated factor 7	DCAF7	A_23_P26834	11.5958	3.40194e-19	9.95874e-18	1.91518
735	acyl-CoA thioesterase 7 pseudogene	LOC344967	A_24_P698136	15.2282	1.4562e-28	1.12217e-26	1.91504
1894	melanoma antigen family D, 1	MAGED1	A_24_P391526	10.8078	2.42927e-18	6.48288e-17	1.91499
1759	secreted and transmembrane 1	SECTM1	A_23_P207905	10.4223	3.88951e-19	1.13412e-17	1.91416
1758	Putative spindle and kinetochore-associated protein 2-like	SKA2L	A_23_P301072	10.9452	3.88158e-19	1.13211e-17	1.91386
2679	calcineurin binding protein 1	CABIN1	A_24_P102512	9.43699	7.48569e-15	1.35169e-13	1.91367
1292	phosphatidylinositol-5-phosphate 4-kinase, type II, alpha	PIP4K2A	A_23_P104344	12.8651	2.87485e-22	1.18407e-20	1.91346
939	RAB35, member RAS oncogene family	RAB35	A_23_P204485	15.0955	5.70457e-26	3.35757e-24	1.91346
3274	phosphodiesterase 4D interacting protein	PDE4DIP	A_24_P253100	8.30363	7.92081e-13	1.13484e-11	1.91328
4114	family with sequence similarity 183, member A	FAM183A	A_24_P847329	6.86702	1.92038e-10	2.07929e-09	1.91279
4056	phosphate regulating endopeptidase homolog, X-linked	PHEX	A_23_P114084	6.93388	1.43422e-10	1.57781e-09	1.91279
1091	mannosyl (alpha-1,3-)-glycoprotein beta-1,4-N-acetylglucosaminyltransferase, isozyme A	MGAT4A	A_23_P28507	12.2044	4.76416e-24	2.33631e-22	1.91271
7033	C-type lectin domain family 3, member A	CLEC3A	A_23_P26404	3.99908	5.16638e-05	0.000296434	1.91199
1857	KIAA1432	KIAA1432	A_24_P306136	10.9535	1.48916e-18	4.07486e-17	1.91185
1100	similar to ARKadia-like 1	LOC729141	A_24_P161240	13.6443	5.84917e-24	2.84205e-22	1.91182
423	WD repeat domain 67	WDR67	A_23_P334219	14.877	1.45631e-33	2.02794e-31	1.9112
670	chromosome 18 open reading frame 25	C18orf25	A_23_P412554	15.8777	1.79995e-29	1.53386e-27	1.91089
846	F-box protein 6	FBXO6	A_23_P97061	14.7792	3.58112e-27	2.37721e-25	1.9107
5182	GRB10 interacting GYF protein 2	GIGYF2	A_24_P271985	5.90393	5.05464e-08	4.1867e-07	1.91063
6323	scratch homolog 2, zinc finger protein (Drosophila)	SCRT2	A_24_P117782	4.77735	4.81277e-06	3.16063e-05	1.90992
1768	coiled-coil domain containing 125	CCDC125	A_23_P432591	10.4775	4.57372e-19	1.32356e-17	1.9099
3179	calcium channel, voltage-dependent, T type, alpha 1H subunit	CACNA1H	A_23_P3483	8.01714	3.8993e-13	5.79048e-12	1.90937
1392	ATPase, H+ transporting, lysosomal 16kDa, V0 subunit c	ATP6V0C	A_23_P54817	12.713	1.32224e-21	5.0631e-20	1.90921
2094	ATP-binding cassette, sub-family B (MDR/TAP), member 8	ABCB8	A_23_P82249	10.7403	2.84234e-17	6.71306e-16	1.9088
5542	immediate early response 3	IER3	A_24_P394520	5.49019	2.2355e-07	1.71711e-06	1.908
1909	sperm associated antigen 4	SPAG4	A_23_P132027	10.5361	3.07856e-18	8.14133e-17	1.90799
504	histone cluster 1, H3e	HIST1H3E	A_23_P70445	17.0484	6.54675e-32	7.48451e-30	1.90796
3036	CD300 molecule-like family member f	CD300LF	A_23_P55020	8.62042	1.38062e-13	2.15991e-12	1.90715
2912	myeloid/lymphoid or mixed-lineage leukemia (trithorax homolog, Drosophila); translocated to, 11	MLLT11	A_23_P23346	8.58465	5.25045e-14	8.64749e-13	1.90697
382	H2A histone family, member Z	H2AFZ	A_24_P354468	16.2748	1.13962e-34	1.77117e-32	1.90682
2131	solute carrier family 35, member F2	SLC35F2	A_23_P202996	9.95321	4.0669e-17	9.44267e-16	1.90661
2549	transmembrane and tetratricopeptide repeat containing 3	TMTC3	A_23_P48264	9.58456	2.69792e-15	5.12217e-14	1.90643
288	glucosidase, beta, acid pseudogene 1	GBAP1	A_23_P201030*	17.4482	2.95388e-37	6.51277e-35	1.9062
289	glucosidase, beta, acid	GBA	A_23_P201030*	17.4482	2.95388e-37	6.51277e-35	1.9062
3092	v-abl Abelson murine leukemia viral oncogene homolog 2 (arg, Abelson-related gene)	ABL2	A_23_P138099	8.93252	2.1932e-13	3.36251e-12	1.90611
845	similar to vesicle-associated membrane protein-associated protein A	LOC728003	A_32_P58993*	13.2029	3.56474e-27	2.37059e-25	1.90567
3259	Thy-1 cell surface antigen	THY1	A_23_P47756	8.4662	7.13464e-13	1.0283e-11	1.90511
2362	chromosome 11 open reading frame 80	C11orf80	A_23_P96160	9.80289	5.48591e-16	1.12766e-14	1.90495
3540	serine incorporator 5	SERINC5	A_24_P6381	8.02508	5.20423e-12	6.77812e-11	1.90492
1033	E2F transcription factor 3	E2F3	NM_001949_2_4371	12.6779	1.04806e-24	5.45752e-23	1.90419
2026	reticulon 4 receptor	RTN4R	A_23_P132175	10.3532	1.27613e-17	3.14847e-16	1.90256
1345	sperm flagellar 1	SPEF1	NM_015417_2_1048	11.6179	6.34765e-22	2.51918e-20	1.90221
5598	F-box protein 16	FBXO16	A_23_P168847	5.45487	2.88955e-07	2.19238e-06	1.90207
1470	similar to CG7600	LOC100132306	A_23_P411215*	12.1617	5.16604e-21	1.84409e-19	1.90174
3481	lysyl oxidase-like 1	LOXL1	A_23_P124082	7.81434	3.67295e-12	4.87401e-11	1.90098
2658	bone morphogenetic protein 1	BMP1	A_24_P129417	9.48272	6.10587e-15	1.11266e-13	1.90097
1107	MAX dimerization protein 3	MXD3	A_23_P124554	13.2306	8.16263e-24	3.92325e-22	1.90049
3008	chloride channel 7	CLCN7	A_23_P129334	9.01934	1.08375e-13	1.716e-12	1.90045
1144	zinc finger CCCH-type, antiviral 1	ZC3HAV1	A_23_P20122	12.6797	1.65323e-23	7.68992e-22	1.90037
340	proteasome (prosome, macropain) 26S subunit, ATPase, 4	PSMC4	NM_006503_2_1201	19.2783	1.25727e-35	2.24256e-33	1.89982
831	xylulokinase homolog (H. influenzae)	XYLB	A_23_P212424	14.1066	2.69044e-27	1.81524e-25	1.89942
1422	ribosomal RNA processing 12 homolog (S. cerevisiae)	RRP12	A_23_P24186	13.2231	2.29323e-21	8.53703e-20	1.8989
2075	BRCA1 associated RING domain 1	BARD1	A_23_P67771	10.7877	2.2957e-17	5.47435e-16	1.89828
2996	thrombospondin 1	THBS1	A_23_P206212	8.68349	9.95369e-14	1.58238e-12	1.89761
1521	centromere protein W	CENPW	A_32_P143245	10.5768	1.16871e-20	4.01081e-19	1.89746
611	pyridoxal-dependent decarboxylase domain containing 1	PDXDC1	A_23_P147845	15.9397	2.50811e-30	2.348e-28	1.89743
3188	dihydrodiol dehydrogenase (dimeric)	DHDH	A_23_P67376	8.09469	4.14951e-13	6.14644e-12	1.89724
2730	dicer 1, ribonuclease type III	DICER1	A_32_P199924	8.75109	1.06155e-14	1.88409e-13	1.89615
2856	sterile alpha motif domain containing 9	SAMD9	A_23_P219079	8.55146	3.43756e-14	5.7755e-13	1.89606
3693	lysine (K)-specific demethylase 4A	KDM4A	A_23_P74446	7.861	1.5543e-11	1.91124e-10	1.89576
1298	steroid 5 alpha-reductase 3	SRD5A3	A_23_P121782	11.8377	3.15965e-22	1.29513e-20	1.89548
2512	glycerol-3-phosphate dehydrogenase 2 (mitochondrial)	GPD2	A_23_P119816	9.55405	2.0312e-15	3.92203e-14	1.8941
1511	zinc finger, AN1-type domain 3	ZFAND3	A_24_P186414	12.6924	8.82973e-21	3.06716e-19	1.89407
3665	tetratricopeptide repeat domain 9	TTC9	A_24_P273738	7.76234	1.26632e-11	1.57155e-10	1.89401
2316	runt-related transcription factor 1	RUNX1	A_23_P6245	9.84475	3.41471e-16	7.18117e-15	1.89364
3221	wingless-type MMTV integration site family, member 3	WNT3	A_23_P130158	7.92724	5.38958e-13	7.88554e-12	1.8926
2820	high-mobility group nucleosome binding domain 1	HMGN1	A_32_P78250	9.31472	2.35555e-14	4.0264e-13	1.89216
934	kinesin family member 21A	KIF21A	AB051495_2_5892	13.2095	4.85544e-26	2.88375e-24	1.89176
1567	glutamyl-tRNA(Gln) amidotransferase, subunit C homolog (bacterial)	GATC	A_23_P76435	11.8866	2.48653e-20	8.23579e-19	1.89176
153	integrator complex subunit 8	INTS8	A_23_P43079	18.0266	2.42078e-42	1.14959e-39	1.89136
565	beta-transducin repeat containing	BTRC	A_23_P35427	15.4598	5.58219e-31	5.70662e-29	1.89136
3809	KIAA1467	KIAA1467	A_23_P394567	7.21737	2.94741e-11	3.50707e-10	1.89129
218	polymerase (RNA) III (DNA directed) polypeptide K, 12.3 kDa	POLR3K	A_24_P382002	17.8864	1.09003e-39	3.44112e-37	1.89096
4304	hexokinase 3 (white cell)	HK3	A_24_P37962	6.891	6.24353e-10	6.3827e-09	1.89085
4281	chromosome 22 open reading frame 41	C22orf41	A_24_P659840	6.61379	5.38572e-10	5.54351e-09	1.89059
1498	endosulfine alpha	ENSA	A_32_P107747	12.0068	7.60432e-21	2.65895e-19	1.89017
2478	sterile alpha and TIR motif containing 1	SARM1	A_23_P66704*	9.15483	1.59681e-15	3.12289e-14	1.89001
5938	LY6/PLAUR domain containing 3	LYPD3	A_24_P48495	5.10438	1.1363e-06	8.04724e-06	1.88964
4542	CD1a molecule	CD1A	A_23_P63167	6.27288	2.33638e-09	2.24493e-08	1.88949
2105	PPPDE peptidase domain containing 1	PPPDE1	A_23_P422204	10.2442	3.28096e-17	7.70477e-16	1.88933
932	receptor accessory protein 4	REEP4	A_23_P96210	14.5683	4.66705e-26	2.7793e-24	1.8893
1296	phosphorylase kinase, alpha 1 (muscle)	PHKA1	A_24_P263089	12.1415	2.97947e-22	1.22353e-20	1.88835
1522	PYD and CARD domain containing	PYCARD	A_23_P26623	10.6202	1.21767e-20	4.17497e-19	1.88827
2295	chromosome 1 open reading frame 96	C1orf96	A_23_P366908	9.64983	2.68893e-16	5.71871e-15	1.88772
3594	chromosome 1 open reading frame 210	C1orf210	A_32_P42943	8.01304	7.95187e-12	1.01195e-10	1.88717
1877	tweety homolog 3 (Drosophila)	TTYH3	AB051478_2_4561	11.1444	1.86077e-18	5.0359e-17	1.88683
2101	ATPase type 13A3	ATP13A3	A_23_P155185	10.6342	3.16001e-17	7.43647e-16	1.88612
4237	CD84 molecule	CD84	A_24_P362193	7.0002	3.93109e-10	4.1052e-09	1.88545
1207	serine dehydratase-like	SDSL	A_23_P53439	12.3905	5.5515e-23	2.45386e-21	1.8854
5166	involucrin	IVL	A_23_P85509	5.66376	4.73943e-08	3.93941e-07	1.88495
1257	DBF4 homolog (S. cerevisiae)	DBF4	A_23_P254612	12.5536	1.55687e-22	6.57559e-21	1.88467
3765	proline rich Gla (G-carboxyglutamic acid) 2	PRRG2	A_23_P67355	7.6816	2.22682e-11	2.68735e-10	1.88446
958	E74-like factor 4 (ets domain transcription factor)	ELF4	A_23_P9621	14.0325	1.32584e-25	7.55156e-24	1.88441
3213	transmembrane protease, serine 6	TMPRSS6	A_23_P211494	7.66669	5.09086e-13	7.4711e-12	1.88392
834	structural maintenance of chromosomes 2	SMC2	A_23_P60271	13.7433	2.84192e-27	1.91048e-25	1.88321
233	phosphorylase kinase, gamma 2 (testis)	PHKG2	A_23_P77682	19.4257	5.71831e-39	1.62516e-36	1.88311
2578	ribosomal protein S6 kinase, 90kDa, polypeptide 1	RPS6KA1	A_23_P52086	9.64929	3.28958e-15	6.18002e-14	1.8831
1681	solute carrier family 2 (facilitated glucose transporter), member 6	SLC2A6	A_23_P169249	11.138	1.18086e-19	3.61391e-18	1.88302
1349	large subunit GTPase 1 homolog (S. cerevisiae)	LSG1	A_24_P148657	12.8204	6.73025e-22	2.66436e-20	1.88287
2150	TNF receptor-associated factor 3	TRAF3	A_23_P37068	10.6369	5.44002e-17	1.24847e-15	1.88267
499	minichromosome maintenance complex component 6	MCM6	A_23_P90612	15.569	4.72031e-32	5.4639e-30	1.88254
3781	pleckstrin homology-like domain, family A, member 2	PHLDA2	A_23_P47614	7.37673	2.48113e-11	2.98034e-10	1.88231
1313	solute carrier family 25, member 39	SLC25A39	A_23_P100762	13.1925	3.8697e-22	1.5671e-20	1.88171
5337	neuron navigator 1	NAV1	A_24_P212096	5.7598	9.47702e-08	7.61581e-07	1.8813
3083	TNFAIP3 interacting protein 3	TNIP3	A_23_P386478	8.0528	2.03836e-13	3.13681e-12	1.88126
2373	elongation factor RNA polymerase II-like 3	ELL3	A_24_P47988	9.72581	6.36288e-16	1.30166e-14	1.88119
868	karyopherin alpha 1 (importin alpha 5)	KPNA1	A_23_P351063	16.2162	6.99409e-27	4.516e-25	1.88066
260	pseudouridylate synthase-like 1	PUSL1	A_23_P51884	18.2992	3.84575e-38	9.58186e-36	1.88037
2471	quinolinate phosphoribosyltransferase	QPRT	A_23_P34233	9.13624	1.51125e-15	2.96286e-14	1.88029
1250	WD repeat domain 5	WDR5	A_23_P32558	12.6742	1.2617e-22	5.37797e-21	1.8798
3370	eukaryotic translation initiation factor 2-alpha kinase 2	EIF2AK2	A_23_P142752	8.18788	1.72946e-12	2.38826e-11	1.87929
3613	GA binding protein transcription factor, beta subunit 2	GABPB2	A_23_P73208	7.83908	8.82253e-12	1.11484e-10	1.87925
761	proliferating cell nuclear antigen	PCNA	A_23_P28886	14.6246	3.21017e-28	2.38611e-26	1.87922
2049	translocase of outer mitochondrial membrane 40 homolog (yeast)	TOMM40	A_23_P153266	10.9791	1.57779e-17	3.84831e-16	1.87916
2788	FH2 domain containing 1	FHDC1	A_32_P99336	8.96296	1.81335e-14	3.13773e-13	1.87899
341	budding uninhibited by benzimidazoles 3 homolog (yeast)	BUB3	A_23_P202316	16.498	1.29809e-35	2.31167e-33	1.87868
2224	cathepsin D	CTSD	A_23_P52557	9.78446	1.32048e-16	2.91258e-15	1.87863
2806	tetraspanin 13	TSPAN13	A_23_P168606	8.55004	2.12509e-14	3.64817e-13	1.87853
2114	taxilin alpha	TXLNA	A_24_P205627	10.7038	3.57908e-17	8.3607e-16	1.87844
4325	carboxymethylenebutenolidase homolog (Pseudomonas)	CMBL	A_32_P223504	6.5925	6.94507e-10	7.06091e-09	1.87835
2697	apolipoprotein C-II	APOC2	A_23_P417743	9.27287	8.25975e-15	1.48351e-13	1.87771
2650	dishevelled, dsh homolog 3 (Drosophila)	DVL3	A_24_P283000	9.67538	5.80809e-15	1.06049e-13	1.87769
3066	UHRF1 binding protein 1	UHRF1BP1	A_23_P145370	8.9125	1.82016e-13	2.81584e-12	1.87716
956	asparagine-linked glycosylation 3, alpha-1,3- mannosyltransferase homolog (S. cerevisiae)	ALG3	A_24_P414269	14.1972	1.24284e-25	7.09703e-24	1.87714
4127	lysophosphatidylglycerol acyltransferase 1	LPGAT1	A_23_P46608	7.19883	2.11339e-10	2.27631e-09	1.87711
281	trafficking protein particle complex 9	TRAPPC9	A_23_P257684	17.9354	1.34952e-37	3.07301e-35	1.87683
1426	WD repeat domain 24	WDR24	A_23_P26475	12.6707	2.58722e-21	9.59933e-20	1.87681
1047	leucine zipper-EF-hand containing transmembrane protein 1	LETM1	A_23_P94998	13.8706	1.27494e-24	6.57425e-23	1.87665
3626	zinc finger protein 768	ZNF768	A_23_P15212	7.97634	9.87671e-12	1.24169e-10	1.87648
2010	rhotekin	RTKN	A_23_P120056	11.1487	1.04683e-17	2.60765e-16	1.87588
1015	TRAF interacting protein	TRAIP	A_23_P147723	13.941	5.9838e-25	3.18609e-23	1.87588
3305	ephrin-A4	EFNA4	A_23_P322	8.14709	1.06249e-12	1.50213e-11	1.8755
673	GTP binding protein 3 (mitochondrial)	GTPBP3	A_23_P28064	15.0361	2.07913e-29	1.75962e-27	1.87493
1279	protein phosphatase, Mg2+/Mn2+ dependent, 1H	PPM1H	A_23_P13847	11.9949	2.20065e-22	9.15548e-21	1.87387
162	exportin 5	XPO5	A_24_P157889	19.8084	5.94705e-42	2.64342e-39	1.87322
1169	poliovirus receptor-related 2 (herpesvirus entry mediator B)	PVRL2	A_23_P352867	13.4315	2.78985e-23	1.27317e-21	1.87209
1297	aarF domain containing kinase 5	ADCK5	A_23_P94361	12.3659	3.12582e-22	1.28221e-20	1.87201
4034	suppressor of Ty 16 homolog (S. cerevisiae)	SUPT16H	A_24_P153800	7.256	1.22724e-10	1.35872e-09	1.87194
1084	metadherin	MTDH	A_23_P340365	13.3501	3.42435e-24	1.69649e-22	1.87192
1734	DENN/MADD domain containing 1A	DENND1A	A_23_P43557	10.9921	2.69195e-19	7.94523e-18	1.87192
679	sorting nexin 22	SNX22	A_24_P375421	15.302	2.36676e-29	1.98342e-27	1.8718
857	PHD finger protein 19	PHF19	A_23_P401905	13.5799	5.18212e-27	3.3814e-25	1.87174
1543	coiled-coil domain containing 137	CCDC137	A_24_P230184	11.9074	1.58905e-20	5.36392e-19	1.87153
4584	golgi transport 1 homolog A (S. cerevisiae)	GOLT1A	A_24_P280846	6.58873	2.79974e-09	2.66525e-08	1.87083
87	RAD21 homolog (S. pombe)	RAD21	NM_006265_1_3043	16.9562	1.00961e-45	8.31044e-43	1.87073
303	papillary renal cell carcinoma (translocation-associated)	PRCC	A_23_P23404	19.3839	7.83463e-37	1.62124e-34	1.87052
2456	small nuclear ribonucleoprotein polypeptide E	SNRPE	A_23_P126283	9.89531	1.33583e-15	2.63569e-14	1.87045
626	nuclear transcription factor Y, alpha	NFYA	A_23_P501583	15.2729	4.03785e-30	3.69908e-28	1.87007
2604	chromosome 6 open reading frame 115	C6orf115	A_32_P160972	9.12104	3.98014e-15	7.39979e-14	1.86969
1442	nuclear prelamin A recognition factor-like	NARFL	A_23_P37876	12.6136	3.36711e-21	1.2308e-19	1.86799
1850	macrophage stimulating 1 receptor (c-met-related tyrosine kinase)	MST1R	A_23_P256312	10.3235	1.35795e-18	3.72867e-17	1.86791
3877	tektin 5	TEKT5	A_32_P130309	7.23356	4.74373e-11	5.51226e-10	1.8679
1101	hypothetical protein LOC221710	LOC221710	A_23_P70683	13.0518	6.06473e-24	2.94293e-22	1.86784
4493	family with sequence similarity 98, member A	FAM98A	A_24_P119002	6.68273	1.84751e-09	1.79585e-08	1.86722
3437	potassium inwardly-rectifying channel, subfamily J, member 11	KCNJ11	A_23_P1973	7.94932	2.55243e-12	3.45054e-11	1.86689
1465	Rho GDP dissociation inhibitor (GDI) alpha	ARHGDIA	A_24_P133933	12.5415	4.68438e-21	1.68134e-19	1.86597
2472	homeobox C11	HOXC11	A_23_P47941	8.86458	1.52069e-15	2.98083e-14	1.86571
2023	cystathionine-beta-synthase	CBS	A_24_P48856	10.1825	1.20341e-17	2.97568e-16	1.86569
2165	solute carrier family 6 (neurotransmitter transporter, creatine), member 10 (pseudogene)	SLC6A10P	A_24_P15621	10.0808	6.51878e-17	1.48379e-15	1.86556
1306	retinoblastoma-like 1 (p107)	RBL1	A_23_P28733	12.1008	3.3869e-22	1.38166e-20	1.86507
3607	degenerative spermatocyte homolog 2, lipid desaturase (Drosophila)	DEGS2	A_23_P88450	7.51998	8.44822e-12	1.07107e-10	1.86471
2040	small nuclear ribonucleoprotein polypeptides B and B1	SNRPB	A_23_P154681	10.9397	1.47818e-17	3.61409e-16	1.86373
1106	itchy E3 ubiquitin protein ligase homolog (mouse)	ITCH	A_23_P132019	13.2062	7.47671e-24	3.60136e-22	1.86298
6998	SAM pointed domain containing ets transcription factor	SPDEF	A_23_P111194	4.12036	4.68179e-05	0.000270248	1.86294
2778	XK, Kell blood group complex subunit-related, X-linked	XKRX	A_32_P416161	8.81869	1.64399e-14	2.85758e-13	1.86293
647	serine hydroxymethyltransferase 2 (mitochondrial)	SHMT2	A_23_P169629	15.2956	7.65193e-30	6.77534e-28	1.8628
462	ELL associated factor 1	EAF1	A_23_P166742	16.2532	1.11148e-32	1.39719e-30	1.8627
460	proteasome (prosome, macropain) activator subunit 2 (PA28 beta)	PSME2	A_23_P65428	14.9684	9.75932e-33	1.23237e-30	1.86255
2830	SH3-domain binding protein 2	SH3BP2	A_23_P110117	9.29085	2.55575e-14	4.35519e-13	1.86182
3002	hairy and enhancer of split 2 (Drosophila)	HES2	A_23_P201686	8.27271	1.03473e-13	1.64166e-12	1.86163
1634	chromosome 16 open reading frame 55	C16orf55	A_32_P107494	11.6536	6.17419e-20	1.94361e-18	1.86156
522	histocompatibility (minor) 13	HM13	A_23_P40344	17.2676	1.62598e-31	1.79072e-29	1.8613
3254	solute carrier family 9 (sodium/hydrogen exchanger), member 7	SLC9A7	A_23_P11032	8.4523	6.9545e-13	1.0039e-11	1.86119
724	cell division cycle 25 homolog B (S. pombe)	CDC25B	A_23_P210726	14.1526	8.27874e-29	6.51067e-27	1.86093
2881	solute carrier family 35, member E3	SLC35E3	A_23_P147725	8.84192	4.15018e-14	6.91322e-13	1.86092
2319	hypothetical protein LOC285216	LOC285216	A_24_P272389	9.78069	3.52398e-16	7.39975e-15	1.86064
5487	low density lipoprotein receptor class A domain containing 1	LDLRAD1	A_24_P491397	5.41868	1.82042e-07	1.41363e-06	1.86013
1466	prolyl 4-hydroxylase, alpha polypeptide I	P4HA1	A_23_P35521	11.5821	4.68531e-21	1.68113e-19	1.85992
1684	gamma-glutamylcyclotransferase	GGCT	A_23_P42694	11.0398	1.23461e-19	3.77319e-18	1.85988
2569	Zic family member 2 (odd-paired homolog, Drosophila)	ZIC2	A_23_P36972	9.24637	3.10709e-15	5.85499e-14	1.85968
1142	regulator of chromosome condensation 2	RCC2	A_23_P74951	13.8062	1.60102e-23	7.46269e-22	1.85939
2858	FK506 binding protein 1A, 12kDa	FKBP1A	A_23_P397238	8.832	3.47561e-14	5.83415e-13	1.85889
672	heparan sulfate 6-O-sulfotransferase 1	HS6ST1	A_23_P90587	15.2281	2.06045e-29	1.74515e-27	1.85863
1133	GEM interacting protein	GMIP	A_23_P56228	13.7222	1.37124e-23	6.4321e-22	1.85861
5314	SH2 domain containing 3A	SH2D3A	A_24_P262723	5.84801	8.56887e-08	6.91703e-07	1.85832
1566	lectin, galactoside-binding, soluble, 8	LGALS8	A_23_P63026	11.2417	2.32293e-20	7.7031e-19	1.85777
1922	DAZ associated protein 1	DAZAP1	A_24_P271223	11.3087	3.50958e-18	9.21539e-17	1.85773
602	N-acetylneuraminic acid synthase	NANS	A_23_P9212	14.9637	1.80307e-30	1.72281e-28	1.85754
5047	KIAA1522	KIAA1522	AB040955_1_4509	6.11624	2.78374e-08	2.37131e-07	1.85744
740	Rho GTPase activating protein 32	ARHGAP32	A_24_P42436	14.1792	1.63198e-28	1.25156e-26	1.85739
3513	spleen focus forming virus (SFFV) proviral integration oncogene spi1	SPI1	A_23_P115992	7.95174	4.37685e-12	5.75585e-11	1.85727
612	potassium channel tetramerisation domain containing 5	KCTD5	A_32_P191084	17.2979	2.7794e-30	2.59761e-28	1.85691
1458	transcription factor 19	TCF19	A_24_P349965	11.4816	4.26757e-21	1.53969e-19	1.85689
1212	TNF receptor-associated factor 2	TRAF2	A_23_P169327	13.5667	5.9645e-23	2.63013e-21	1.85628
2914	transmembrane protein 110	TMEM110	A_24_P255082	9.0775	5.34114e-14	8.79034e-13	1.85593
912	similar to dual specificity phosphatase 8	LOC441554	A_32_P98298*	12.4362	2.76296e-26	1.68235e-24	1.85579
913	similar to dual specificity phosphatase 8	LOC728813	A_32_P98298*	12.4362	2.76296e-26	1.68235e-24	1.85579
1369	DDB1 and CUL4 associated factor 8	DCAF8	A_24_P76725	12.1077	8.4098e-22	3.28941e-20	1.85572
2476	ash1 (absent, small, or homeotic)-like (Drosophila)	ASH1L	A_23_P63079	9.99029	1.56369e-15	3.06027e-14	1.85516
4026	oncoprotein induced transcript 3	OIT3	A_23_P63777	7.21908	1.17745e-10	1.30659e-09	1.85509
1539	leucine rich repeat and coiled-coil domain containing 1	LRRCC1	A_24_P307695	11.1587	1.5015e-20	5.08072e-19	1.85402
3020	BR serine/threonine kinase 2	BRSK2	A_23_P32515	8.02759	1.16283e-13	1.83469e-12	1.85389
1717	rabaptin, RAB GTPase binding effector protein 2	RABEP2	A_23_P61100	11.7588	2.18522e-19	6.52413e-18	1.85382
1447	inositol 1,4,5-triphosphate receptor, type 3	ITPR3	A_23_P19517	12.3622	3.64636e-21	1.32764e-19	1.8536
2496	heat shock protein 90kDa alpha (cytosolic), class A member 1	HSP90AA1	A_23_P162874	9.3567	1.82686e-15	3.54596e-14	1.85301
3635	family with sequence similarity 188, member B2	FAM188B2	A_32_P40890	7.41581	1.04178e-11	1.30617e-10	1.85299
682	chromosome 13 open reading frame 34	C13orf34	A_23_P25623	14.1098	2.59576e-29	2.16879e-27	1.8525
2531	apolipoprotein O-like	APOOL	A_23_P136986	9.51726	2.26847e-15	4.34995e-14	1.85222
3936	leukocyte immunoglobulin-like receptor, subfamily B (with TM and ITIM domains), member 1	LILRB1	A_23_P343221	7.23392	6.95356e-11	7.92026e-10	1.85204
751	family with sequence similarity 122B	FAM122B	A_23_P382688	15.1037	2.64701e-28	1.99419e-26	1.85193
6075	HORMA domain containing 1	HORMAD1	A_23_P327532	4.77572	1.87797e-06	1.29489e-05	1.8514
3655	nebulin-related anchoring protein	NRAP	A_23_P402765*	7.24353	1.21026e-11	1.50518e-10	1.8514
3656	hyaluronan binding protein 2	HABP2	A_23_P402765*	7.24353	1.21026e-11	1.50518e-10	1.8514
5702	glutamate receptor interacting protein 1	GRIP1	A_23_P113381	5.33053	4.49579e-07	3.33591e-06	1.85139
103	jumping translocation breakpoint	JTB	A_23_P34979	20.6851	8.08606e-45	5.51256e-42	1.85112
1054	KDEL (Lys-Asp-Glu-Leu) endoplasmic reticulum protein retention receptor 1	KDELR1	A_23_P4919	14.2783	1.42316e-24	7.30801e-23	1.85106
2345	ADP-ribosylation factor-like 8B	ARL8B	A_23_P212229	9.89873	4.5082e-16	9.35159e-15	1.85077
784	solute carrier family 25 (mitochondrial thiamine pyrophosphate carrier), member 19	SLC25A19	A_23_P375404	14.4885	6.85337e-28	4.88811e-26	1.85075
962	ADP-ribosylation factor GTPase activating protein 1	ARFGAP1	A_23_P210379	14.4973	1.5151e-25	8.59872e-24	1.85074
1336	serine/threonine kinase 4	STK4	A_23_P143199	13.1431	5.47422e-22	2.18739e-20	1.8506
2002	nicalin homolog (zebrafish)	NCLN	A_23_P130898	10.9158	9.54844e-18	2.39245e-16	1.85057
1711	coatomer protein complex, subunit gamma	COPG	A_23_P44617	11.9222	1.8661e-19	5.60904e-18	1.85026
4803	docking protein 7	DOK7	A_23_P398854	6.05015	9.02517e-09	8.1266e-08	1.85016
1376	zinc finger and BTB domain containing 9	ZBTB9	A_23_P8112	13.1347	1.02788e-21	3.97983e-20	1.84991
2198	PWWP domain containing 2B	PWWP2B	A_23_P374389	10.5392	9.57644e-17	2.14203e-15	1.84977
2186	zinc finger protein 814	ZNF814	A_23_P101281*	9.83638	8.21255e-17	1.8485e-15	1.84971
2495	nuclear receptor coactivator 2	NCOA2	A_23_P134875	9.76763	1.82484e-15	3.54266e-14	1.84917
210	chromosome 21 open reading frame 45	C21orf45	A_23_P252335	18.6625	7.29239e-40	2.3764e-37	1.84852
236	ubiquilin 1	UBQLN1	A_23_P250910	18.0779	5.85977e-39	1.64849e-36	1.84851
3680	UDP-glucose ceramide glucosyltransferase	UGCG	A_23_P313380	7.31971	1.35676e-11	1.67818e-10	1.84828
1633	family with sequence similarity 155, member B	FAM155B	A_23_P22647	10.4913	5.99911e-20	1.89064e-18	1.84817
1132	hypoxanthine phosphoribosyltransferase 1	HPRT1	A_23_P11372	13.1606	1.35155e-23	6.34779e-22	1.848
788	N-terminal EF-hand calcium binding protein 3	NECAB3	A_23_P68628	13.185	7.69181e-28	5.45809e-26	1.848
3121	SLAM family member 9	SLAMF9	A_23_P96833	8.5867	2.83452e-13	4.29245e-12	1.84716
3708	adaptor-related protein complex 1, sigma 3 subunit	AP1S3	A_23_P385294	7.70758	1.65437e-11	2.02801e-10	1.84694
5666	pleckstrin and Sec7 domain containing 3	PSD3	A_23_P216167	5.24931	3.80229e-07	2.84258e-06	1.84678
1402	Bcl2 modifying factor	BMF	A_23_P379645	11.951	1.68506e-21	6.38423e-20	1.84672
2876	synovial sarcoma, X breakpoint 2 interacting protein	SSX2IP	A_23_P201373	9.03745	3.9973e-14	6.67455e-13	1.8467
1028	N-ethylmaleimide-sensitive factor attachment protein, gamma	NAPG	A_23_P141764	13.3219	8.97813e-25	4.70159e-23	1.84636
3419	sel-1 suppressor of lin-12-like (C. elegans)	SEL1L	A_23_P88411	8.16799	2.25628e-12	3.06885e-11	1.8453
1438	vascular endothelial growth factor A	VEGFA	A_23_P81806	11.9689	3.10218e-21	1.13921e-19	1.84524
2143	PPPDE peptidase domain containing 2	PPPDE2	A_23_P356325	10.4265	4.9725e-17	1.14615e-15	1.84507
3882	ankyrin repeat and IBR domain containing 1	ANKIB1	A_23_P93918	7.54265	4.83106e-11	5.60671e-10	1.84485
3125	makorin ring finger protein 3	MKRN3	A_23_P21334	8.36616	2.91028e-13	4.40118e-12	1.84462
1248	chromosome 1 open reading frame 93	C1orf93	A_32_P84289	12.5905	1.15471e-22	4.92951e-21	1.84429
4499	prostaglandin I2 (prostacyclin) receptor (IP)	PTGIR	A_23_P340853	6.70734	1.92986e-09	1.87277e-08	1.84404
2700	glutathione reductase	GSR	A_24_P346545	9.03334	8.30413e-15	1.49052e-13	1.84391
993	FCH and double SH3 domains 1	FCHSD1	A_23_P69850*	13.072	2.63666e-25	1.45551e-23	1.8433
994	RELT-like 2	RELL2	A_23_P69850*	13.072	2.63666e-25	1.45551e-23	1.8433
3885	parvalbumin	PVALB	A_23_P17843	6.93236	4.96311e-11	5.75215e-10	1.84322
2801	major histocompatibility complex, class II, DP beta 2 (pseudogene)	HLA-DPB2	A_23_P59171	8.58066	2.04746e-14	3.52415e-13	1.84241
3974	chromosome 21 open reading frame 96	C21orf96	A_23_P17642	7.149	8.74056e-11	9.8417e-10	1.84181
5809	sulfotransferase family, cytosolic, 2B, member 1	SULT2B1	A_23_P107981	5.20737	6.87761e-07	4.99974e-06	1.84107
1967	defective in sister chromatid cohesion 1 homolog (S. cerevisiae)	DSCC1	A_24_P363717	9.90644	5.84917e-18	1.49799e-16	1.84088
1137	ras homolog gene family, member F (in filopodia)	RHOF	A_24_P81789	12.1731	1.46304e-23	6.84248e-22	1.84059
2541	major histocompatibility complex, class II, DQ beta 1	HLA-DQB1	A_24_P239676	9.11566	2.5122e-15	4.79168e-14	1.84049
5342	small nucleolar RNA, H/ACA box 21	SNORA21	A_24_P205242	5.77142	9.68193e-08	7.77374e-07	1.84039
2239	ubiquitin specific peptidase 41	USP41	A_32_P54553	9.81748	1.50421e-16	3.29884e-15	1.84037
1607	ARP2 actin-related protein 2 homolog (yeast)	ACTR2	A_24_P872365	11.7149	4.56006e-20	1.45863e-18	1.84011
437	BCL2-like 12 (proline rich)	BCL2L12	A_24_P65638	15.7084	2.80694e-33	3.76255e-31	1.84008
3069	chromosome 19 open reading frame 59	C19orf59	A_23_P330561	8.25814	1.88986e-13	2.91919e-12	1.83988
412	histone cluster 2, H3c pseudogene	LOC391769	A_24_P7934	17.8701	7.50784e-34	1.07651e-31	1.83977
4817	midkine (neurite growth-promoting factor 2)	MDK	A_23_P116235	6.16195	9.84052e-09	8.82858e-08	1.83965
3873	phosphoserine phosphatase	PSPH	A_23_P251984	7.26036	4.57749e-11	5.32801e-10	1.83949
3043	coiled-coil domain containing 24	CCDC24	A_23_P420320	8.71353	1.49862e-13	2.33564e-12	1.83924
2851	acid phosphatase 2, lysosomal	ACP2	A_23_P138776	9.27952	3.19185e-14	5.37731e-13	1.83813
3705	profilin 2	PFN2	A_24_P396981	7.42132	1.63789e-11	2.00869e-10	1.83807
1996	family with sequence similarity 57, member B	FAM57B	A_23_P163710	9.97619	9.02557e-18	2.26706e-16	1.8379
1735	mitochondrial ribosomal protein L47	MRPL47	A_23_P425492	11.7365	2.71346e-19	8.00658e-18	1.8378
2833	similar to hCG1995469	FLJ39609	A_24_P940999	8.26215	2.59211e-14	4.41377e-13	1.83753
1547	phosphatidylinositol glycan anchor biosynthesis, class T	PIGT	NM_015937_2_1807	11.5108	1.67288e-20	5.63148e-19	1.8369
247	RAE1 RNA export 1 homolog (S. pombe)	RAE1	A_23_P346206	17.5578	1.52337e-38	4.00193e-36	1.83681
312	coatomer protein complex, subunit alpha	COPA	NM_004371_2_4912	18.5919	1.7258e-36	3.44302e-34	1.83675
5601	solute carrier family 26 (sulfate transporter), member 1	SLC26A1	A_24_P37667	5.49232	2.90083e-07	2.20019e-06	1.83653
2577	chromosome 19 open reading frame 22	C19orf22	A_23_P315286	9.73018	3.24768e-15	6.10749e-14	1.83642
1122	ring finger protein 187	RNF187	A_24_P23995	14.2664	1.12849e-23	5.34759e-22	1.8363
2722	WNK lysine deficient protein kinase 1	WNK1	A_23_P84587	9.44259	9.87889e-15	1.75953e-13	1.83628
2640	thymine-DNA glycosylase	TDG	A_24_P526171*	9.36629	4.94056e-15	9.07905e-14	1.83624
2641	similar to G/T mismatch-specific thymine DNA glycosylase	LOC732360	A_24_P526171*	9.36629	4.94056e-15	9.07905e-14	1.83624
4384	transmembrane protein 63B	TMEM63B	A_23_P167856	6.93119	9.70942e-10	9.70969e-09	1.83613
4449	hCG2045048	LOC644058	A_32_P4629	6.61867	1.45396e-09	1.42779e-08	1.83583
2627	solute carrier family 38, member 5	SLC38A5	A_23_P84928	9.23849	4.70715e-15	8.68027e-14	1.83521
4492	calcium binding tyrosine-(Y)-phosphorylation regulated	CABYR	A_23_P101170	6.61476	1.81802e-09	1.76888e-08	1.83457
3590	achaete-scute complex homolog 1 (Drosophila)	ASCL1	NM_004316_1_1451	7.23598	7.72711e-12	9.85154e-11	1.83438
736	UDP-N-acetyl-alpha-D-galactosamine:polypeptide N-acetylgalactosaminyltransferase 2 (GalNAc-T2)	GALNT2	A_23_P806	14.2986	1.49258e-28	1.14862e-26	1.8339
1791	tubulin, beta	TUBB	A_23_P387054	11.2072	6.77846e-19	1.92991e-17	1.83336
1451	mitochondrial ribosomal protein L13	MRPL13	A_23_P44974	11.7428	3.98357e-21	1.44426e-19	1.83323
660	hypothetical protein LOC729082	LOC729082	A_24_P655268	14.7885	1.26882e-29	1.09809e-27	1.83286
3797	solute carrier family 38, member 1	SLC38A1	A_23_P99231	7.51323	2.72078e-11	3.25308e-10	1.83253
1068	ubiquitin specific peptidase 6 (Tre-2 oncogene)	USP6	A_24_P170454	12.4188	2.12848e-24	1.07267e-22	1.83237
1798	chromosome 20 open reading frame 134	C20orf134	A_23_P210890	10.4297	7.09751e-19	2.01404e-17	1.83212
1032	DnaJ (Hsp40) homolog, subfamily A, member 3	DNAJA3	A_23_P118307	14.2205	1.04567e-24	5.44762e-23	1.83125
5462	iodotyrosine deiodinase	IYD	A_32_P110472	5.49046	1.652e-07	1.28924e-06	1.83124
1181	phosphatidylinositol glycan anchor biosynthesis, class Q	PIGQ	A_23_P502603	12.6764	3.74392e-23	1.6912e-21	1.83098
1819	carnitine palmitoyltransferase 1A (liver)	CPT1A	A_23_P104563	10.6505	8.36967e-19	2.35221e-17	1.83085
3297	chromosome 21 open reading frame 56	C21orf56	A_23_P371766	8.27035	9.84795e-13	1.3978e-11	1.8308
2579	importin 7	IPO7	A_32_P139589	9.7566	3.35301e-15	6.29599e-14	1.83071
2129	aminolevulinate dehydratase	ALAD	A_23_P324278	10.1498	3.91309e-17	9.09886e-16	1.83
3904	hypothetical protein LOC286149	LOC286149	A_32_P192882	7.19481	5.53677e-11	6.37512e-10	1.82994
1816	zinc finger with KRAB and SCAN domains 2	ZKSCAN2	A_24_P341325	11.3275	8.08659e-19	2.27784e-17	1.82976
864	Src-like-adaptor 2	SLA2	A_23_P102582*	14.2115	6.40922e-27	4.15526e-25	1.82939
2356	ELK1, member of ETS oncogene family	ELK1	A_23_P171048	10.2703	5.17893e-16	1.06811e-14	1.82896
2580	similar to Down-regulated in metastasis protein (Key-1A6 protein) (Novel nucleolar protein 73) (NNP73)	LOC653877	A_23_P162525*	9.44114	3.35413e-15	6.29702e-14	1.82895
2581	UTP20, small subunit (SSU) processome component, homolog (yeast)	UTP20	A_23_P162525*	9.44114	3.35413e-15	6.29702e-14	1.82895
3943	protein kinase C, iota	PRKCI	A_24_P461118	7.50023	7.30014e-11	8.29886e-10	1.82868
6605	chromatin modifying protein 4C	CHMP4C	A_23_P432598	4.50484	1.341e-05	8.31981e-05	1.82858
380	adiponectin receptor 1	ADIPOR1	NM_015999_2_1814	17.4694	1.03433e-34	1.62113e-32	1.82828
2177	transmembrane protein 121	TMEM121	A_23_P61986	9.46294	7.73368e-17	1.7485e-15	1.82778
3180	cysteine/histidine-rich 1	CYHR1	A_24_P40978	8.61368	3.93666e-13	5.84519e-12	1.82774
1810	selenophosphate synthetase pseudogene	LOC168474	A_24_P118452	10.7495	7.69034e-19	2.17228e-17	1.82761
1271	chromosome 15 open reading frame 23	C15orf23	A_23_P140705	12.4498	1.99965e-22	8.35992e-21	1.82749
1086	protease, serine, 22	PRSS22	A_23_P66203	13.4582	3.62135e-24	1.7909e-22	1.82703
315	stress-induced-phosphoprotein 1	STIP1	A_23_P113078	18.5709	2.41889e-36	4.74901e-34	1.82677
3855	cyclin M4	CNNM4	A_23_P119926	7.62597	4.01638e-11	4.70247e-10	1.82622
2086	mitochondrial protein 18 kDa	MTP18	A_23_P29204	10.504	2.61814e-17	6.21259e-16	1.82616
3404	ELKS/RAB6-interacting/CAST family member 1	ERC1	A_23_P258372	8.21736	2.10231e-12	2.87244e-11	1.82613
2716	myosin light chain kinase 2	MYLK2	A_23_P80008	9.2062	9.36583e-15	1.6719e-13	1.82574
2130	KIAA0040	KIAA0040	A_24_P11140	9.69995	3.99755e-17	9.28747e-16	1.82565
3334	Pvt1 oncogene (non-protein coding)	PVT1	A_23_P352014	8.05494	1.33297e-12	1.86694e-11	1.82507
2897	B-cell linker	BLNK	A_24_P64341	8.73294	4.58566e-14	7.59762e-13	1.825
4007	growth regulation by estrogen in breast cancer 1	GREB1	A_23_P108862	6.92587	1.07557e-10	1.19868e-09	1.82494
3329	chromosome 14 open reading frame 174	C14orf174	A_23_P349025	7.95893	1.28589e-12	1.80397e-11	1.82461
1026	chromosome 9 open reading frame 53	C9orf53	A_23_P307502	13.565	8.23761e-25	4.32807e-23	1.82437
1413	abhydrolase domain containing 12	ABHD12	A_23_P149494	11.8136	1.99902e-21	7.50462e-20	1.82419
100	family with sequence similarity 189, member B	FAM189B	A_23_P103690	18.9214	3.33691e-45	2.3923e-42	1.82372
2370	protein tyrosine phosphatase type IVA, member 3	PTP4A3	A_23_P72169	9.66697	5.95377e-16	1.22044e-14	1.82362
7188	proline rich 24	PRR24	A_23_P339744	3.9832	8.2408e-05	0.000460218	1.82339
1459	tetraspanin 17	TSPAN17	A_23_P425516	12.6843	4.38131e-21	1.58022e-19	1.82332
849	potassium channel tetramerisation domain containing 13	KCTD13	A_23_P44851	15.0611	3.8698e-27	2.5551e-25	1.82314
2451	LSM domain containing 1	LSMD1	A_23_P38206	9.41831	1.30809e-15	2.58553e-14	1.8231
1404	deoxyribonuclease I-like 2	DNASE1L2	A_23_P3642	11.6722	1.79355e-21	6.77905e-20	1.82304
223	OTU domain containing 4	OTUD4	A_23_P212970	17.0277	2.10181e-39	6.36403e-37	1.82272
6116	interferon regulatory factor 6	IRF6	A_23_P748	5.02705	2.16044e-06	1.47902e-05	1.82248
1558	deleted in lymphocytic leukemia 2 (non-protein coding)	DLEU2	A_23_P22075	11.0797	2.06132e-20	6.88076e-19	1.82204
825	glyceraldehyde-3-phosphate dehydrogenase-like 7, pseudogene	GAPDHL7	A_24_P662086	14.3285	2.21634e-27	1.50818e-25	1.82191
1437	DOT1-like, histone H3 methyltransferase (S. cerevisiae)	DOT1L	A_23_P408768	12.1128	3.04986e-21	1.12073e-19	1.82189
3363	phosphoglycolate phosphatase	PGP	A_23_P66097	8.22706	1.64458e-12	2.27812e-11	1.82162
3519	CD177 molecule	CD177	A_32_P143589	7.27979	4.63002e-12	6.06581e-11	1.82092
5204	hypothetical LOC646976	LOC646976	A_24_P350546	5.7329	5.43086e-08	4.48294e-07	1.82078
926	growth differentiation factor 11	GDF11	A_23_P76102	13.3622	4.43622e-26	2.65321e-24	1.82064
2194	Der1-like domain family, member 1	DERL1	A_24_P175347	10.091	8.82792e-17	1.97939e-15	1.82037
6311	melanoma antigen family C, 1	MAGEC1	A_23_P217170	4.68638	4.67238e-06	3.07315e-05	1.82004
1102	phosphoinositide-3-kinase, regulatory subunit 3 (gamma)	PIK3R3	BC021622_1_4952	13.2394	6.26841e-24	3.03646e-22	1.81982
1209	SWI/SNF related, matrix associated, actin dependent regulator of chromatin, subfamily c, member 1	SMARCC1	A_23_P123952	13.2184	5.67277e-23	2.50547e-21	1.81968
2448	similar to solute carrier family 6 member 8	LOC653562	A_24_P15627*	9.45601	1.23705e-15	2.44991e-14	1.81952
2483	zinc finger protein 643	ZNF643	A_23_P160200	9.55832	1.67012e-15	3.25766e-14	1.8194
5272	glucosaminyl (N-acetyl) transferase 3, mucin type	GCNT3	A_23_P151916	5.58953	7.08013e-08	5.7647e-07	1.81915
3390	sialic acid binding Ig-like lectin 10	SIGLEC10	A_23_P208182	8.01228	1.95237e-12	2.67811e-11	1.81889
2538	carbonic anhydrase IX	CA9	A_23_P157793	8.77815	2.41365e-15	4.61321e-14	1.8181
3140	chromosome 8 open reading frame 55	C8orf55	A_23_P257054	8.45762	3.20771e-13	4.82668e-12	1.81801
1145	adaptor-related protein complex 1, sigma 1 subunit	AP1S1	A_23_P157404	13.1663	1.66772e-23	7.75084e-22	1.81773
865	microtubule associated serine/threonine kinase 2	MAST2	A_23_P126006	15.1241	6.54137e-27	4.23847e-25	1.81688
3544	hypothetical protein FLJ23867	FLJ23867	A_23_P380264	7.59586	5.31446e-12	6.91359e-11	1.81625
2013	F-box protein 41	FBXO41	A_23_P349676	10.5949	1.09606e-17	2.72601e-16	1.81597
4621	proprotein convertase subtilisin/kexin type 1 inhibitor	PCSK1N	A_23_P22487	6.42694	3.43625e-09	3.23763e-08	1.81563
6120	NK2 homeobox 2	NKX2-2	A_23_P17524	4.77737	2.19932e-06	1.50397e-05	1.81554
1731	ADP-ribosylation factor-like 5B	ARL5B	A_23_P378588	10.8854	2.58671e-19	7.6529e-18	1.81529
1267	GrpE-like 2, mitochondrial (E. coli)	GRPEL2	A_23_P41676	12.8654	1.90979e-22	7.99931e-21	1.81471
3483	erythropoietin	EPO	A_23_P145664	7.46	3.7236e-12	4.93827e-11	1.81447
1811	ankyrin repeat and SOCS box-containing 13	ASB13	A_24_P278299	10.449	7.7121e-19	2.17787e-17	1.81437
1937	family with sequence similarity 102, member A	FAM102A	A_32_P89523	10.7654	4.1352e-18	1.07792e-16	1.81426
947	neurensin 2	NRSN2	A_23_P143274	14.3597	8.52481e-26	4.94417e-24	1.814
546	spermatogenesis associated, serine-rich 2	SPATS2	A_23_P99302	17.1838	4.14723e-31	4.35178e-29	1.81392
7479	OTU domain containing 7A	OTUD7A	A_23_P3413	3.75994	0.000179506	0.00095638	1.81366
3517	exocyst complex component 5	EXOC5	A_24_P224217	8.01913	4.53257e-12	5.94375e-11	1.81305
4651	reticulocalbin 3, EF-hand calcium binding domain	RCN3	A_23_P67339	6.50249	4.08068e-09	3.81505e-08	1.81303
6613	HtrA serine peptidase 3	HTRA3	A_23_P10542	4.45837	1.3657e-05	8.45795e-05	1.8126
3198	syndecan 4	SDC4	A_24_P373976	8.44476	4.69701e-13	6.92236e-12	1.81201
1246	mitochondrial ribosomal protein S30	MRPS30	A_23_P252369	11.4825	1.12247e-22	4.80107e-21	1.81164
1476	Berardinelli-Seip congenital lipodystrophy 2 (seipin)	BSCL2	A_23_P150566	12.1379	5.66786e-21	2.01739e-19	1.81147
3964	leucine rich repeat containing 58	LRRC58	A_24_P23866	7.3818	8.30902e-11	9.38432e-10	1.81137
5406	EF-hand calcium binding domain 10	EFCAB10	A_24_P84498	5.59334	1.33513e-07	1.05439e-06	1.81097
2498	solute carrier family 1 (neuronal/epithelial high affinity glutamate transporter, system Xag), member 1	SLC1A1	A_24_P232253	8.31076	1.84995e-15	3.58827e-14	1.81076
2063	glycine C-acetyltransferase	GCAT	NM_014291_2_1100	10.2396	1.99279e-17	4.79421e-16	1.81038
1409	endoplasmic reticulum-golgi intermediate compartment (ERGIC) 1	ERGIC1	A_23_P333227	12.374	1.87847e-21	7.07838e-20	1.80963
3414	hypothetical LOC151009	LOC151009	A_24_P11737	8.26511	2.14687e-12	2.92827e-11	1.80948
2625	similar to dynamin 1	LOC727858	A_23_P305981*	9.34851	4.68529e-15	8.64283e-14	1.80913
2626	hypothetical LOC388152	LOC388152	A_23_P305981*	9.34851	4.68529e-15	8.64283e-14	1.80913
31	CSE1 chromosome segregation 1-like (yeast)	CSE1L	A_23_P17394	19.9429	9.26618e-54	2.3402e-50	1.8088
1396	similar to tubulin, beta 5	LOC442308	A_24_P647683	12.2291	1.42451e-21	5.43411e-20	1.80878
992	microtubule associated serine/threonine kinase-like	MASTL	A_24_P258051	13.1628	2.59493e-25	1.4339e-23	1.80873
151	zinc finger protein 64 homolog (mouse)	ZFP64	A_23_P120467	18.8177	2.33841e-42	1.12005e-39	1.80842
1682	family with sequence similarity 91, member A2	FAM91A2	A_24_P845072*	11.324	1.22868e-19	3.75716e-18	1.80837
1861	sorting nexin family member 27	SNX27	A_23_P201238	10.8076	1.52636e-18	4.16742e-17	1.80831
3475	melanoma antigen family D, 2	MAGED2	A_23_P33898	7.58722	3.47368e-12	4.61839e-11	1.80826
639	Smith-Magenis syndrome chromosome region, candidate 8	SMCR8	A_23_P300124	15.8164	6.11512e-30	5.49782e-28	1.80821
2039	transcriptional regulating factor 1	TRERF1	A_24_P217904	9.53909	1.46271e-17	3.57704e-16	1.80814
1150	chromosome 12 open reading frame 66	C12orf66	A_23_P370564	12.4115	1.89195e-23	8.76728e-22	1.8079
2171	protein phosphatase 2A activator, regulatory subunit 4	PPP2R4	A_23_P60460	10.5539	6.85335e-17	1.55612e-15	1.8079
1649	LSM11, U7 small nuclear RNA associated	LSM11	A_32_P46525	11.6274	7.62626e-20	2.37182e-18	1.80781
2643	zinc finger protein 544	ZNF544	A_23_P141863	9.50783	5.06941e-15	9.3066e-14	1.80777
3485	chromosome 16 open reading frame 92	C16orf92	A_23_P163708*	7.69513	3.7439e-12	4.964e-11	1.80769
2489	nucleoporin like 1	NUPL1	A_23_P204892	9.90892	1.72873e-15	3.36607e-14	1.8073
3500	cancer susceptibility candidate 4	CASC4	A_24_P284213	7.98999	4.10192e-12	5.41351e-11	1.80722
2980	myosin IXB	MYO9B	A_24_P922921	9.01923	8.40144e-14	1.34776e-12	1.80679
2748	hypothetical LOC100127913	LOC100127913	A_32_P182048	8.89097	1.25822e-14	2.21616e-13	1.80677
387	zinc finger protein 8	ZNF8	A_23_P130466	17.5575	1.76041e-34	2.69081e-32	1.80662
431	splicing factor 3b, subunit 4, 49kDa	SF3B4	A_23_P35125	17.954	2.04758e-33	2.80559e-31	1.80577
3240	docking protein 3	DOK3	A_32_P121087	8.41917	6.10923e-13	8.87304e-12	1.80563
2513	X-ray repair complementing defective repair in Chinese hamster cells 2	XRCC2	A_23_P134585	9.48237	2.03505e-15	3.92879e-14	1.80561
1600	chromosome 1 open reading frame 194	C1orf194	A_32_P15510	10.3363	4.05119e-20	1.30487e-18	1.80541
1763	KIAA0562	KIAA0562	A_24_P295877	11.4497	4.32113e-19	1.25471e-17	1.80519
6624	glial cell derived neurotrophic factor	GDNF	A_24_P376454	4.48275	1.40528e-05	8.68807e-05	1.80503
5049	tumor necrosis factor (ligand) superfamily, member 13b	TNFSF13B	A_24_P205084	5.99078	2.80717e-08	2.39017e-07	1.80494
191	secretory carrier membrane protein 3	SCAMP3	A_23_P97271	19.6398	6.48883e-41	2.39554e-38	1.80452
2916	septin 3	2003-09-01	A_23_P211572	8.50455	5.42531e-14	8.91961e-13	1.80444
428	nuclear cap binding protein subunit 1, 80kDa	NCBP1	NM_002486_1_2751	17.7342	1.76239e-33	2.43584e-31	1.80425
2751	aldehyde dehydrogenase 1 family, member B1	ALDH1B1	A_23_P135295	9.25623	1.30433e-14	2.29337e-13	1.80368
2133	ankyrin repeat and MYND domain containing 1	ANKMY1	A_23_P131463	10.1085	4.24805e-17	9.84681e-16	1.80352
889	RAS protein activator like 2	RASAL2	A_23_P502740	13.6788	1.3205e-26	8.28557e-25	1.80346
927	similar to spermine synthase	LOC646347	A_23_P251661*	13.7897	4.47698e-26	2.67327e-24	1.80321
928	spermine synthase	SMS	A_23_P251661*	13.7897	4.47698e-26	2.67327e-24	1.80321
728	eukaryotic translation initiation factor 1A domain containing	EIF1AD	A_23_P127468	15.4702	1.03029e-28	8.06827e-27	1.80317
4032	heat shock protein 90kDa alpha (cytosolic), class B member 3 (pseudogene)	HSP90AB3P	A_24_P161525	7.2711	1.20611e-10	1.33626e-09	1.80312
2705	heat shock 105kDa/110kDa protein 1	HSPH1	A_23_P88121	9.22536	8.54686e-15	1.5326e-13	1.80305
2777	mannosidase, alpha, class 1A, member 2	MAN1A2	A_23_P103571	9.0863	1.61012e-14	2.80046e-13	1.80271
1431	ubiquitin-conjugating enzyme E2O	UBE2O	A_24_P172993	12.1589	2.77431e-21	1.02422e-19	1.80267
3056	solute carrier family 7 (cationic amino acid transporter, y+ system), member 2	SLC7A2	A_23_P255837	8.06568	1.67883e-13	2.60591e-12	1.80246
965	cyclin-dependent kinase 12	CDK12	A_23_P159115	12.9319	1.55909e-25	8.83029e-24	1.80218
1848	tumor necrosis factor, alpha-induced protein 8-like 1	TNFAIP8L1	A_23_P428875	11.1284	1.30854e-18	3.6028e-17	1.80182
537	leucine-rich repeats and WD repeat domain containing 1	LRWD1	AL133057_1_1975	17.2915	3.12815e-31	3.33919e-29	1.80162
733	Yip1 interacting factor homolog B (S. cerevisiae)	YIF1B	A_23_P153625	15.5317	1.42645e-28	1.10077e-26	1.80152
5246	solute carrier family 7, (cationic amino acid transporter, y+ system) member 13	SLC7A13	A_23_P336659	5.64799	6.46883e-08	5.2914e-07	1.80074
3291	suppressor of cytokine signaling 1	SOCS1	NM_003745_1_1000	8.2747	9.36015e-13	1.33213e-11	1.80067
3430	heat shock protein 90kDa alpha (cytosolic), class A member 6 (pseudogene)	HSP90AA6P	A_24_P783681	8.02901	2.48204e-12	3.36151e-11	1.80048
2948	Williams Beuren syndrome chromosome region 27	WBSCR27	A_23_P381017	8.43828	6.80324e-14	1.10445e-12	1.80026
4622	PTK7 protein tyrosine kinase 7	PTK7	A_23_P122402	6.48676	3.43874e-09	3.2397e-08	1.80019
1694	Gen homolog 1, endonuclease (Drosophila)	GEN1	A_24_P177583	11.3602	1.38252e-19	4.20557e-18	1.79984
[truncated: 463 more rows]
